# Supplementary material for: The protein phosphatase PPM1A dephosphorylates and activates YAP to govern mammalian intestinal and liver regeneration
Source: PubMed Central journal article supplement (PMC7978383; doi:10.1371/journal.pbio.3001122), 2021-02-25

Figure 1

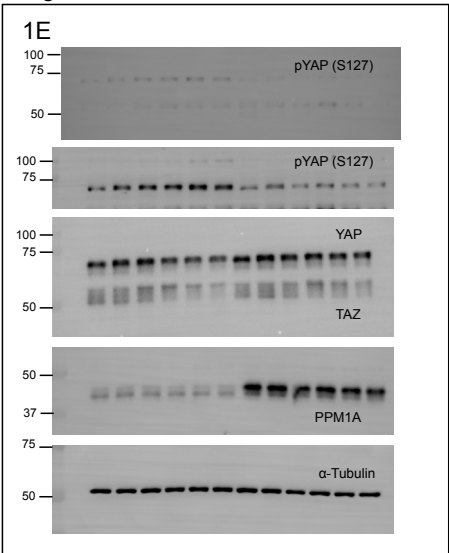

Figure 1

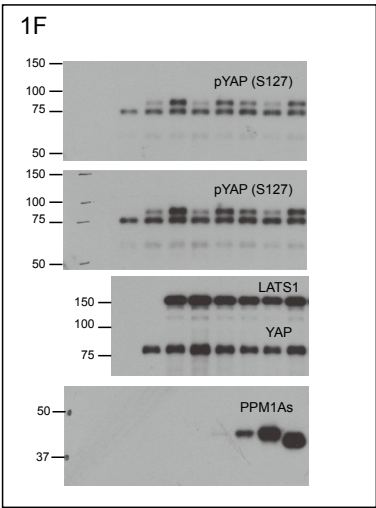

Figure 1

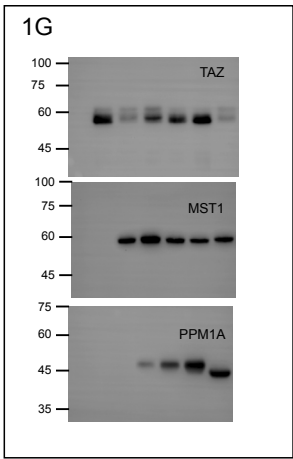

Figure 1

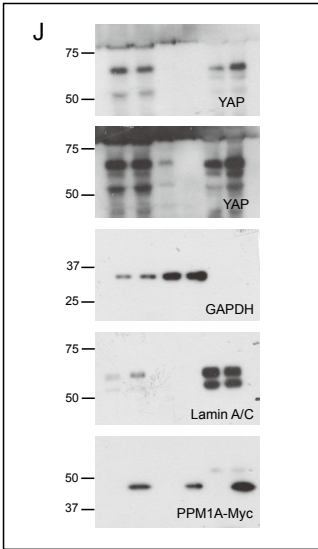

Figure S1

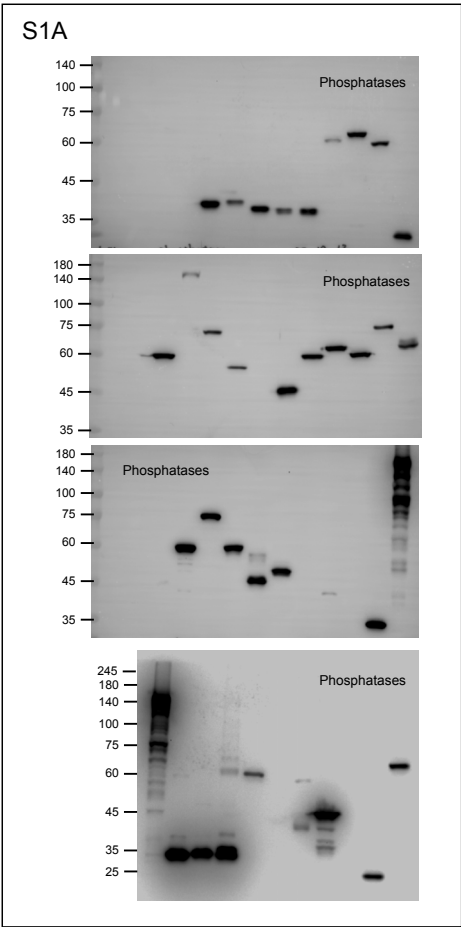

Figure 2

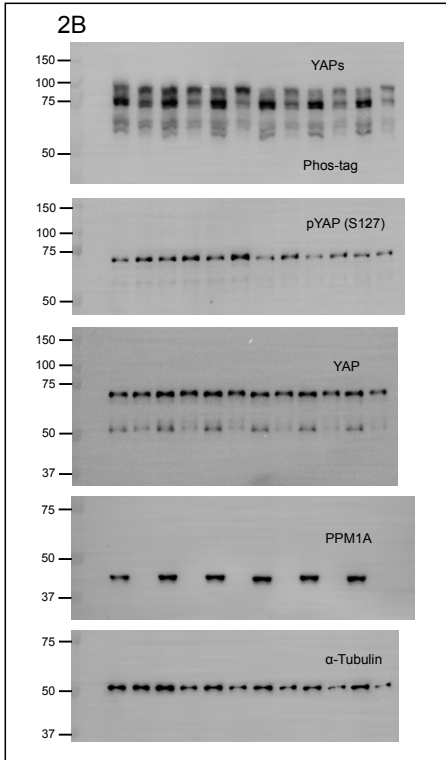

Figure 2

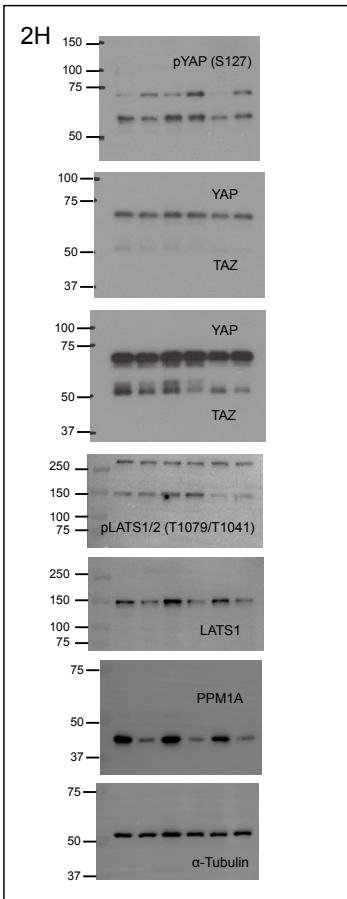

Figure 2

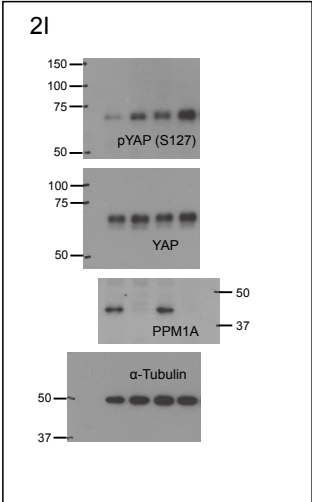

Figure 2

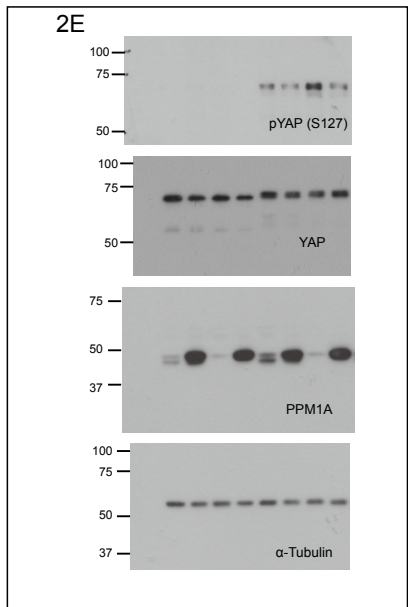

Figure S2

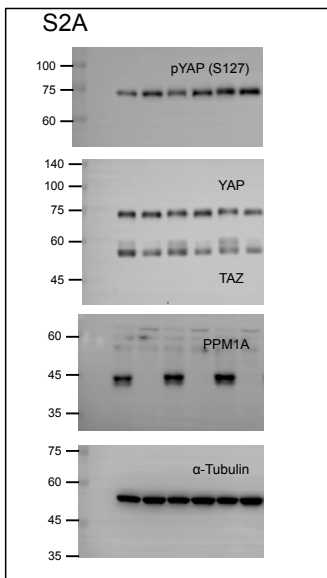

Figure S2

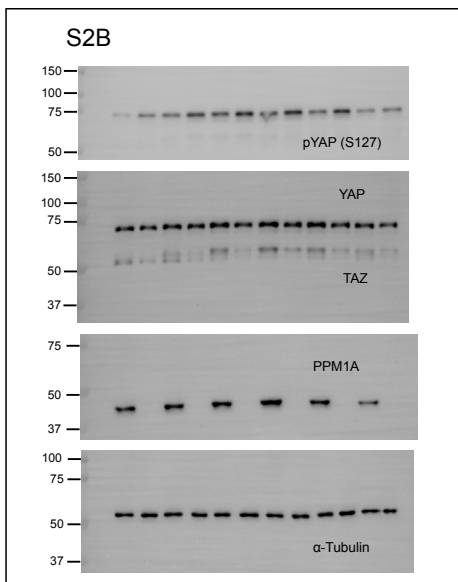

Figure S2

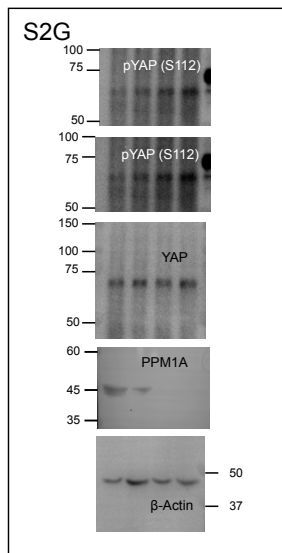

Figure S2

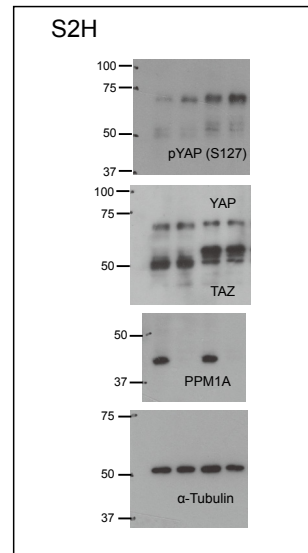

Figure 3

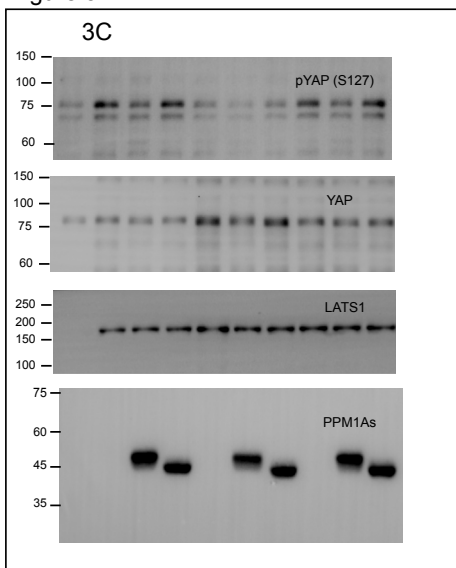

Figure 3

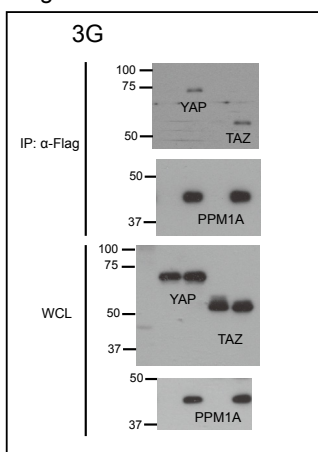

Figure 3

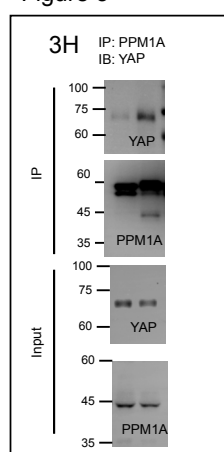

Figure 3

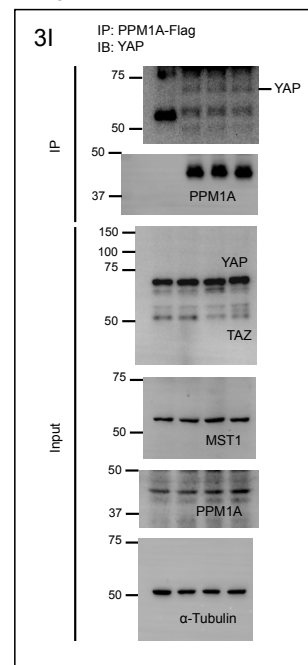

Figure 3

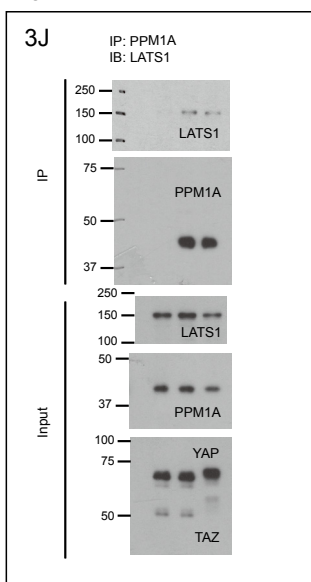

Figure 4

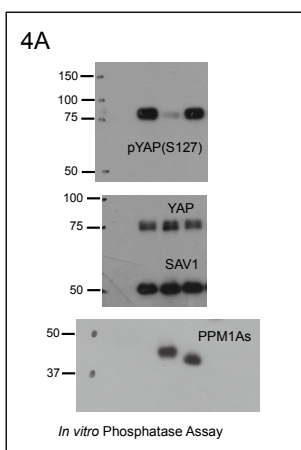

Figure 4

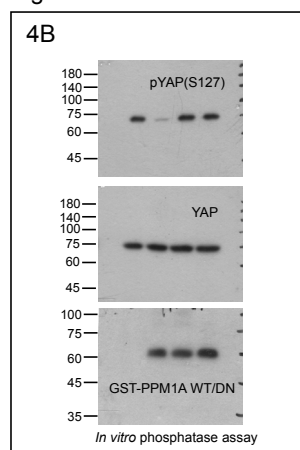

Figure 4

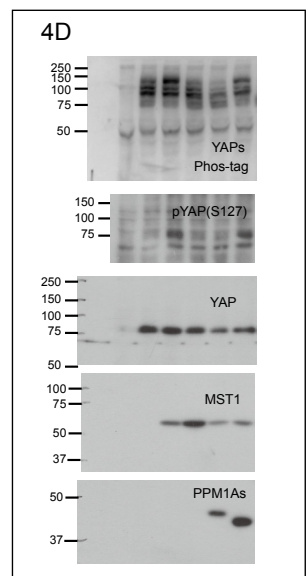

Figure S3

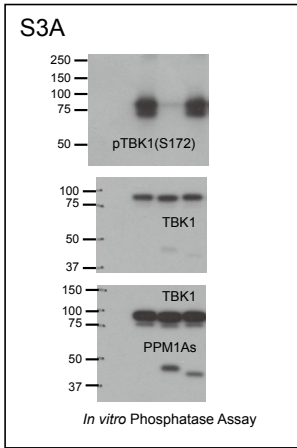

Figure S3

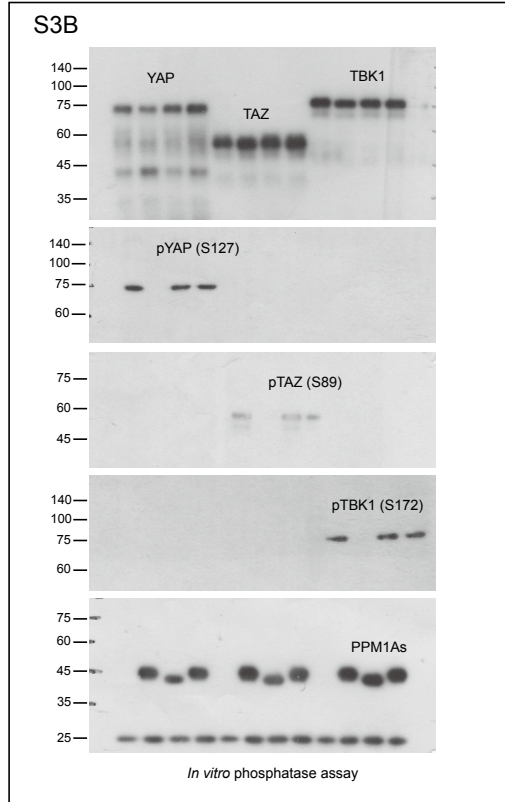

Figure 5

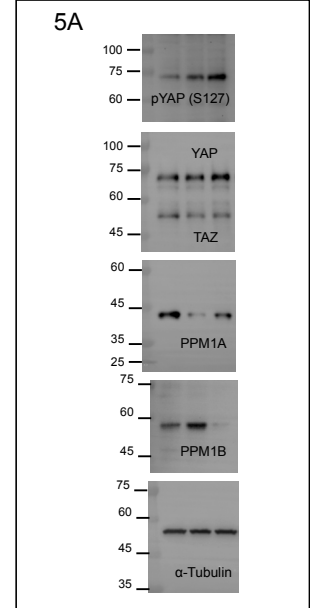

Figure 7

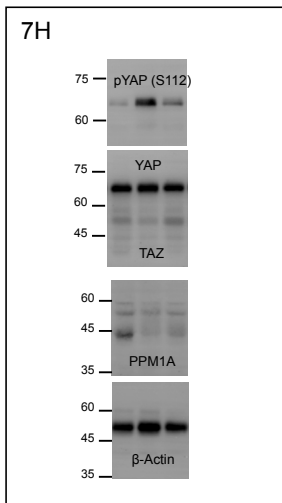

Supplement: pbio.3001122.s010.pdf [file pbio.3001122.s010.pdf]
