# Supplementary material for: The protein phosphatase PPM1A dephosphorylates and activates YAP to govern mammalian intestinal and liver regeneration
Source: PLoS Biol. 2021 Feb 25;19(2):e3001122. doi: 10.1371/journal.pbio.3001122 (PMC7978383; doi:10.1371/journal.pbio.3001122)
Supplement: S2 Table — (XLSX) [file pbio.3001122.s007.xlsx]

## Sheet: Antibodies
S2 Table. Antibodies Used in Study
Antibody	Company	Catalog	Species	Clone		Dilution
					WB	IP	IF	IHC
anti-YAP/TAZ	Santa Cruz Biotechnology	sc-101199	Mouse	Monoclonal	1:1000	1:100	1:100	1:50
anti-YAP	Cell Signaling Technology	14074	Rabbit	Monoclonal	1:1000	1:100	1:100	1:200
anti-pYAP (S127)	Cell Signaling Technology	4911	Rabbit	Polyclonal	1:1000
anti-pYAP (S127)	Cell Signaling Technology	13008	Rabbit	Monoclonal	1:1000		1:100	1:200
anti-pTAZ (S89)	Cell Signaling Technology	59971S	Rabbit	Monoclonal	1:1000
anti-PPM1A	Cell Signaling Technology	3549	Rabbit	Monoclonal	1:1000	1:100	1:200	1:200
anti-pLATS1/2 (T1079)	Cell Signaling Technology	8654	Rabbit	Monoclonal	1:1000
anti-LATS1	Cell Signaling Technology	3477	Rabbit	Monoclonal	1:1000
anti-pTBK1 (S172)	Cell Signaling Technology	5483S	Rabbit	Monoclonal	1:2000
anti-HA	Cell Signaling Technology	3724	Rabbit	Monoclonal	1:5000	1:200	1:200
anti-HA	Sigma	H9658	Mouse	Monoclonal	1:3000	1:200	1:200
anti-Flag (M2)	Sigma	F3165	Mouse	Monoclonal (M2 clone)	1:5000	1:200	1:500
anti-Flag M2 agarose	Sigma	A2220	Mouse	Monoclonal (M2 clone)	IP (~20ul/2mgs proteins)
Anti-α-tubulin	Sigma	T6199	Mouse	Monoclonal	1:20000
anti-Myc	Cell Signaling Technology	2276	Mouse	Monoclonal	1:3000	1:200	1:100
anti-β-Actin	Sigma	A5441	Mouse	Monoclonal	1:20000
anti-Ki67	Servicebio	GB13030-2	Rabbit	Monoclonal				1:200
anti-CK19	Servicebio	GB14058	Mouse	Monoclonal				1:200
Alexa-labeled secondary antibodies	Jackson	111-095-003					1:500
	Jackson	115-095-003					1:500
	Jackson	111-025-003					1:500
	Jackson	115-025-003					1:500
