# Supplementary material for: The protein phosphatase PPM1A dephosphorylates and activates YAP to govern mammalian intestinal and liver regeneration
Source: PLoS Biol. 2021 Feb 25;19(2):e3001122. doi: 10.1371/journal.pbio.3001122 (PMC7978383; doi:10.1371/journal.pbio.3001122)
Supplement: S4 Table — (XLSX) [file pbio.3001122.s009.xlsx]

## Sheet: S4 Table
S4 Table. MS Results of YAP Modification
(See details in the following sheets)

## Sheet: YAP+MST1+SAV1
Checked	Protein FDR Confidence: Combined	Master	Accession	Description	Exp. q-value: Combined	Sum PEP Score	Coverage [%]	# Peptides	# PSMs	# Unique Peptides	# Protein Groups	# AAs	MW [kDa]	calc. pI	Score Sequest HT: Sequest HT	# Peptides (by Search Engine): Sequest HT
FALSE	High	Master Protein	P46937	Transcriptional coactivator YAP1 OS=Homo sapiens OX=9606 GN=YAP1 PE=1 SV=2	0	146.628	59	21	142	21	1	504	54.4	5.17	582.8	21
	Checked	Confidence	Sequence	Modifications	Qvality PEP	Qvality q-value	# Protein Groups	# Proteins	# PSMs	Master Protein Accessions	# Missed Cleavages	Theo. MH+ [Da]	Confidence (by Search Engine): Sequest HT	Percolator q-Value (by Search Engine): Sequest HT	Percolator PEP (by Search Engine): Sequest HT	XCorr (by Search Engine): Sequest HT
	FALSE	High	LQQLQMEKER		0.024615	0	1	1	2	P46937	1	1302.68	High	0	0.02231	3.01
		Checked	Confidence	Identifying Node	PSM Ambiguity	Annotated Sequence	Modifications	# Protein Groups	# Proteins	Master Protein Accessions	Protein Accessions	# Missed Cleavages	Charge	DeltaScore	DeltaCn	Rank	Search Engine Rank	m/z [Da]	MH+ [Da]	Theo. MH+ [Da]	DeltaM [ppm]	Deltam/z [Da]	Activation Type	MS Order	Isolation Interference [%]	Ion Inject Time [ms]	RT [min]	First Scan	Spectrum File	File ID	XCorr	Percolator q-Value	Percolator PEP
		FALSE	High	Sequest HT (A2)	Unambiguous	LQQLQMEKER		1	1	P46937	P46937	1	2	0.608	0	1	1	651.846	1302.68	1302.68	0.71	0.00046	HCD (High Energy Collision Dissociation)	MS2	0	34.161	13.0192	11251	WQR_1_20190806.raw	F4	3.01	0	0.02231
		FALSE	High	Sequest HT (A2)	Unambiguous	LQQLQMEKER		1	1	P46937	P46937	1	3	0.358	0	1	1	434.9	1302.68	1302.68	0.4	0.00017	HCD (High Energy Collision Dissociation)	MS2	70.2171	10.992	13.0146	11247	WQR_1_20190806.raw	F4	2.43	0.0007925	0.05598
	FALSE	High	LPDSFFKPPEPK		0.00554244	0	1	1	4	P46937	0	1401.74	High	0	0.007147	4.38
		Checked	Confidence	Identifying Node	PSM Ambiguity	Annotated Sequence	Modifications	# Protein Groups	# Proteins	Master Protein Accessions	Protein Accessions	# Missed Cleavages	Charge	DeltaScore	DeltaCn	Rank	Search Engine Rank	m/z [Da]	MH+ [Da]	Theo. MH+ [Da]	DeltaM [ppm]	Deltam/z [Da]	Activation Type	MS Order	Isolation Interference [%]	Ion Inject Time [ms]	RT [min]	First Scan	Spectrum File	File ID	XCorr	Percolator q-Value	Percolator PEP
		FALSE	High	Sequest HT (A2)	Unambiguous	LPDSFFKPPEPK		1	1	P46937	P46937	0	2	0.6986	0	1	1	701.375	1401.74	1401.74	0.51	0.00036	HCD (High Energy Collision Dissociation)	MS2	8.14824	11.055	27.5493	28583	WQR_1_20190806.raw	F4	4.38	0	0.007147
		FALSE	High	Sequest HT (A2)	Unambiguous	LPDSFFKPPEPK		1	1	P46937	P46937	0	2	0.6615	0	1	1	701.375	1401.74	1401.74	1.47	0.00103	HCD (High Energy Collision Dissociation)	MS2	0	12.119	27.5542	28588	WQR_1_20190806.raw	F4	3.9	0	0.01192
		FALSE	High	Sequest HT (A2)	Unambiguous	LPDSFFKPPEPK		1	1	P46937	P46937	0	3	0.6201	0	1	1	467.919	1401.74	1401.74	0.59	0.00027	HCD (High Energy Collision Dissociation)	MS2	13.8962	0.613	27.7329	28819	WQR_1_20190806.raw	F4	3.58	0	0.004733
		FALSE	High	Sequest HT (A2)	Unambiguous	LPDSFFKPPEPK		1	1	P46937	P46937	0	3	0.544	0	1	1	467.919	1401.74	1401.74	0.32	0.00015	HCD (High Energy Collision Dissociation)	MS2	0	45	26.9694	27840	WQR_1_20190806.raw	F4	2.5	0.0007925	0.06794
	FALSE	High	TMTTNSSDPFLNSGTYHSR		4.40497e-06	0	1	1	2	P46937	0	2115.94	High	0	2.801e-06	5.19
		Checked	Confidence	Identifying Node	PSM Ambiguity	Annotated Sequence	Modifications	# Protein Groups	# Proteins	Master Protein Accessions	Protein Accessions	# Missed Cleavages	Charge	DeltaScore	DeltaCn	Rank	Search Engine Rank	m/z [Da]	MH+ [Da]	Theo. MH+ [Da]	DeltaM [ppm]	Deltam/z [Da]	Activation Type	MS Order	Isolation Interference [%]	Ion Inject Time [ms]	RT [min]	First Scan	Spectrum File	File ID	XCorr	Percolator q-Value	Percolator PEP
		FALSE	High	Sequest HT (A2)	Unambiguous	TMTTNSSDPFLNSGTYHSR		1	1	P46937	P46937	0	3	0.7148	0	1	1	705.987	2115.95	2115.94	2.87	0.00202	HCD (High Energy Collision Dissociation)	MS2	0	18.487	22.457	22336	WQR_1_20190806.raw	F4	5.19	0	2.801e-06
		FALSE	High	Sequest HT (A2)	Unambiguous	TMTTNSSDPFLNSGTYHSR		1	1	P46937	P46937	0	3	0.607	0	1	1	705.986	2115.94	2115.94	1.4	0.00099	HCD (High Energy Collision Dissociation)	MS2	21.9303	45	23.2177	23275	WQR_1_20190806.raw	F4	4.3	0	0.0006652
	FALSE	High	TMTTNSSDPFLNSGTYHSR	1xOxidation [M2]	1.23933e-05	0	1	1	1	P46937	0	2131.93	High	0	8.236e-06	5.9
		Checked	Confidence	Identifying Node	PSM Ambiguity	Annotated Sequence	Modifications	# Protein Groups	# Proteins	Master Protein Accessions	Protein Accessions	# Missed Cleavages	Charge	DeltaScore	DeltaCn	Rank	Search Engine Rank	m/z [Da]	MH+ [Da]	Theo. MH+ [Da]	DeltaM [ppm]	Deltam/z [Da]	Activation Type	MS Order	Isolation Interference [%]	Ion Inject Time [ms]	RT [min]	First Scan	Spectrum File	File ID	XCorr	Percolator q-Value	Percolator PEP
		FALSE	High	Sequest HT (A2)	Unambiguous	TmTTNSSDPFLNSGTYHSR	M2(Oxidation)	1	1	P46937	P46937	0	3	0.6915	0	1	1	711.319	2131.94	2131.93	3.83	0.00272	HCD (High Energy Collision Dissociation)	MS2	5.58242	19.971	19.9579	19309	WQR_1_20190806.raw	F4	5.9	0	8.236e-06
	FALSE	High	TMTTNSSDPFLNSGTYHSR	1xPhospho [S]	0.00201498	0	1	1	2	P46937	0	2195.91	High	0	0.001654	4
		Checked	Confidence	Identifying Node	PSM Ambiguity	Annotated Sequence	Modifications	# Protein Groups	# Proteins	Master Protein Accessions	Protein Accessions	# Missed Cleavages	Charge	DeltaScore	DeltaCn	Rank	Search Engine Rank	m/z [Da]	MH+ [Da]	Theo. MH+ [Da]	DeltaM [ppm]	Deltam/z [Da]	Activation Type	MS Order	Isolation Interference [%]	Ion Inject Time [ms]	RT [min]	First Scan	Spectrum File	File ID	XCorr	Percolator q-Value	Percolator PEP
		FALSE	High	Sequest HT (A2)	Unambiguous	TMTTNSsDPFLNSGTYHSR	S7(Phospho)	1	1	P46937	P46937	0	3	0.015	0	1	1	732.644	2195.92	2195.91	4.53	0.00332	HCD (High Energy Collision Dissociation)	MS2	64.2985	41.704	25.4075	25930	WQR_1_20190806.raw	F4	4	0	0.001654
		FALSE	High	Sequest HT (A2)	Unambiguous	TMTTNsSDPFLNSGTYHSR	S6(Phospho)	1	1	P46937	P46937	0	3		0.015	2	2	732.644	2195.92	2195.91	4.53	0.00332	HCD (High Energy Collision Dissociation)	MS2	64.2985	41.704	25.4075	25930	WQR_1_20190806.raw	F4	3.94	0	0.001714
	FALSE	High	TPDDFLNSVDEMDTGDTINQSTLPSQQNR		0.000194135	0	1	1	6	P46937	0	3238.44	High	0	0.0005918	6.27
		Checked	Confidence	Identifying Node	PSM Ambiguity	Annotated Sequence	Modifications	# Protein Groups	# Proteins	Master Protein Accessions	Protein Accessions	# Missed Cleavages	Charge	DeltaScore	DeltaCn	Rank	Search Engine Rank	m/z [Da]	MH+ [Da]	Theo. MH+ [Da]	DeltaM [ppm]	Deltam/z [Da]	Activation Type	MS Order	Isolation Interference [%]	Ion Inject Time [ms]	RT [min]	First Scan	Spectrum File	File ID	XCorr	Percolator q-Value	Percolator PEP
		FALSE	High	Sequest HT (A2)	Unambiguous	TPDDFLNSVDEMDTGDTINQSTLPSQQNR		1	1	P46937	P46937	0	3	0.7051	0	1	1	1080.15	3238.45	3238.44	1.77	0.00191	HCD (High Energy Collision Dissociation)	MS2	3.59723	17.09	41.049	44977	WQR_1_20190806.raw	F4	5.12	0	0.01441
		FALSE	High	Sequest HT (A2)	Unambiguous	TPDDFLNSVDEMDTGDTINQSTLPSQQNR		1	1	P46937	P46937	0	3	0.7853	0	1	1	1080.15	3238.45	3238.44	1.77	0.00191	HCD (High Energy Collision Dissociation)	MS2	19.0424	2.289	41.0484	44976	WQR_1_20190806.raw	F4	6.24	0	0.001783
		FALSE	High	Sequest HT (A2)	Unambiguous	TPDDFLNSVDEMDTGDTINQSTLPSQQNR		1	1	P46937	P46937	0	3	0.7443	0	1	1	1080.15	3238.45	3238.44	0.64	0.00069	HCD (High Energy Collision Dissociation)	MS2	0	11.52	40.8262	44714	WQR_1_20190806.raw	F4	5.67	0	0.0001644
		FALSE	High	Sequest HT (A2)	Unambiguous	TPDDFLNSVDEMDTGDTINQSTLPSQQNR		1	1	P46937	P46937	0	3	0.7927	0	1	1	1080.15	3238.45	3238.44	0.64	0.00069	HCD (High Energy Collision Dissociation)	MS2	0	10.761	40.8226	44708	WQR_1_20190806.raw	F4	6.27	0	0.0005918
		FALSE	High	Sequest HT (A2)	Unambiguous	TPDDFLNSVDEMDTGDTINQSTLPSQQNR		1	1	P46937	P46937	0	3	0.7017	0	1	1	1080.16	3238.46	3238.44	4.03	0.00435	HCD (High Energy Collision Dissociation)	MS2	14.3142	45	40.7593	44627	WQR_1_20190806.raw	F4	6	0	0.0001443
		FALSE	High	Sequest HT (A2)	Unambiguous	TPDDFLNSVDEMDTGDTINQSTLPSQQNR		1	1	P46937	P46937	0	3	0.5822	0	1	1	1080.16	3238.46	3238.44	4.37	0.00472	HCD (High Energy Collision Dissociation)	MS2	13.6101	45	40.5094	44308	WQR_1_20190806.raw	F4	5.17	0	0.0006111
	FALSE	High	TPDDFLNSVDEMDTGDTINQSTLPSQQNR	1xOxidation [M12]	4.09634e-05	0	1	1	4	P46937	0	3254.44	High	0	0.000774	6.15
		Checked	Confidence	Identifying Node	PSM Ambiguity	Annotated Sequence	Modifications	# Protein Groups	# Proteins	Master Protein Accessions	Protein Accessions	# Missed Cleavages	Charge	DeltaScore	DeltaCn	Rank	Search Engine Rank	m/z [Da]	MH+ [Da]	Theo. MH+ [Da]	DeltaM [ppm]	Deltam/z [Da]	Activation Type	MS Order	Isolation Interference [%]	Ion Inject Time [ms]	RT [min]	First Scan	Spectrum File	File ID	XCorr	Percolator q-Value	Percolator PEP
		FALSE	High	Sequest HT (A2)	Unambiguous	TPDDFLNSVDEmDTGDTINQSTLPSQQNR	M12(Oxidation)	1	1	P46937	P46937	0	3	0.6789	0	1	1	1085.49	3254.44	3254.44	1.34	0.00145	HCD (High Energy Collision Dissociation)	MS2	7.0993	36.792	35.5321	38416	WQR_1_20190806.raw	F4	5.17	0	0.0004944
		FALSE	High	Sequest HT (A2)	Unambiguous	TPDDFLNSVDEmDTGDTINQSTLPSQQNR	M12(Oxidation)	1	1	P46937	P46937	0	3	0.7597	0	1	1	1085.49	3254.45	3254.44	2.57	0.00279	HCD (High Energy Collision Dissociation)	MS2	0	33.913	35.5094	38391	WQR_1_20190806.raw	F4	5.91	0	0.0004124
		FALSE	High	Sequest HT (A2)	Unambiguous	TPDDFLNSVDEmDTGDTINQSTLPSQQNR	M12(Oxidation)	1	1	P46937	P46937	0	3	0.8211	0	1	1	1085.49	3254.44	3254.44	1.11	0.00121	HCD (High Energy Collision Dissociation)	MS2	0	37.748	35.4931	38374	WQR_1_20190806.raw	F4	6.15	0	0.000774
		FALSE	High	Sequest HT (A2)	Unambiguous	TPDDFLNSVDEmDTGDTINQSTLPSQQNR	M12(Oxidation)	1	1	P46937	P46937	0	3	0.7664	0	1	1	1085.48	3254.44	3254.44	-0.24	-0.00026	HCD (High Energy Collision Dissociation)	MS2	24.6065	32.286	35.4755	38354	WQR_1_20190806.raw	F4	5.65	0	2.86e-05
	FALSE	High	KLPDSFFKPPEPK		0.00155607	0	1	1	9	P46937	1	1529.84	High	0.0007925	0.03141	3.64
		Checked	Confidence	Identifying Node	PSM Ambiguity	Annotated Sequence	Modifications	# Protein Groups	# Proteins	Master Protein Accessions	Protein Accessions	# Missed Cleavages	Charge	DeltaScore	DeltaCn	Rank	Search Engine Rank	m/z [Da]	MH+ [Da]	Theo. MH+ [Da]	DeltaM [ppm]	Deltam/z [Da]	Activation Type	MS Order	Isolation Interference [%]	Ion Inject Time [ms]	RT [min]	First Scan	Spectrum File	File ID	XCorr	Percolator q-Value	Percolator PEP
		FALSE	High	Sequest HT (A2)	Unambiguous	KLPDSFFKPPEPK		1	1	P46937	P46937	1	3	0.713	0	1	1	510.618	1529.84	1529.84	1.52	0.00077	HCD (High Energy Collision Dissociation)	MS2	0.187925	0.096	24.8023	25208	WQR_1_20190806.raw	F4	3.38	0	0.02155
		FALSE	High	Sequest HT (A2)	Unambiguous	KLPDSFFKPPEPK		1	1	P46937	P46937	1	2	0.5823	0	1	1	765.423	1529.84	1529.84	1.35	0.00103	HCD (High Energy Collision Dissociation)	MS2	4.51759	1.052	24.9853	25428	WQR_1_20190806.raw	F4	3.28	0	0.01785
		FALSE	High	Sequest HT (A2)	Unambiguous	KLPDSFFKPPEPK		1	1	P46937	P46937	1	2	0.5923	0	1	1	765.423	1529.84	1529.84	1.67	0.00128	HCD (High Energy Collision Dissociation)	MS2	0	45	24.1125	24388	WQR_1_20190806.raw	F4	3.36	0	0.001259
		FALSE	High	Sequest HT (A2)	Unambiguous	KLPDSFFKPPEPK		1	1	P46937	P46937	1	3	0.6424	0	1	1	510.618	1529.84	1529.84	1.16	0.00059	HCD (High Energy Collision Dissociation)	MS2	13.4032	0.328	25.5612	26110	WQR_1_20190806.raw	F4	3.44	0.0007925	0.04168
		FALSE	High	Sequest HT (A2)	Unambiguous	KLPDSFFKPPEPK		1	1	P46937	P46937	1	3	0.5317	0	1	1	510.618	1529.84	1529.84	2	0.00102	HCD (High Energy Collision Dissociation)	MS2	9.04469	15.385	23.2721	23346	WQR_1_20190806.raw	F4	3.31	0.0007925	0.02655
		FALSE	High	Sequest HT (A2)	Unambiguous	KLPDSFFKPPEPK		1	1	P46937	P46937	1	3	0.6549	0	1	1	510.618	1529.84	1529.84	1.7	0.00087	HCD (High Energy Collision Dissociation)	MS2	0	5.242	23.6526	23801	WQR_1_20190806.raw	F4	3.39	0.0007925	0.02511
		FALSE	High	Sequest HT (A2)	Unambiguous	KLPDSFFKPPEPK		1	1	P46937	P46937	1	3	0.6758	0	1	1	510.617	1529.84	1529.84	-0.34	-0.00017	HCD (High Energy Collision Dissociation)	MS2	0	1.229	24.04	24304	WQR_1_20190806.raw	F4	3.64	0.0007925	0.03141
		FALSE	High	Sequest HT (A2)	Unambiguous	KLPDSFFKPPEPK		1	1	P46937	P46937	1	2	0.5179	0	1	1	765.422	1529.84	1529.84	0.23	0.00018	HCD (High Energy Collision Dissociation)	MS2	15.7402	36.897	25.7486	26335	WQR_1_20190806.raw	F4	3.07	0.00393	0.1967
		FALSE	High	Sequest HT (A2)	Unambiguous	KLPDSFFKPPEPK		1	1	P46937	P46937	1	4	0.7325	0	1	1	383.215	1529.84	1529.84	0.37	0.00014	HCD (High Energy Collision Dissociation)	MS2	0	2.514	24.5538	24903	WQR_1_20190806.raw	F4	3.14	0.00702	0.2611
	FALSE	High	QSSFEIPDDVPLPAGWEMAKTSSGQR		0.000766716	0	1	1	1	P46937	1	2833.35	High	0	0.0006026	5.43
		Checked	Confidence	Identifying Node	PSM Ambiguity	Annotated Sequence	Modifications	# Protein Groups	# Proteins	Master Protein Accessions	Protein Accessions	# Missed Cleavages	Charge	DeltaScore	DeltaCn	Rank	Search Engine Rank	m/z [Da]	MH+ [Da]	Theo. MH+ [Da]	DeltaM [ppm]	Deltam/z [Da]	Activation Type	MS Order	Isolation Interference [%]	Ion Inject Time [ms]	RT [min]	First Scan	Spectrum File	File ID	XCorr	Percolator q-Value	Percolator PEP
		FALSE	High	Sequest HT (A2)	Unambiguous	QSSFEIPDDVPLPAGWEMAKTSSGQR		1	1	P46937	P46937	1	3	0.7256	0	1	1	945.121	2833.35	2833.35	0.53	0.0005	HCD (High Energy Collision Dissociation)	MS2	0	45	43.4285	47759	WQR_1_20190806.raw	F4	5.43	0	0.0006026
	FALSE	High	QSSFEIPDDVPLPAGWEMAK	1xOxidation [M18]	0.00296249	0	1	1	6	P46937	0	2233.05	High	0.0007925	0.02916	4.29
		Checked	Confidence	Identifying Node	PSM Ambiguity	Annotated Sequence	Modifications	# Protein Groups	# Proteins	Master Protein Accessions	Protein Accessions	# Missed Cleavages	Charge	DeltaScore	DeltaCn	Rank	Search Engine Rank	m/z [Da]	MH+ [Da]	Theo. MH+ [Da]	DeltaM [ppm]	Deltam/z [Da]	Activation Type	MS Order	Isolation Interference [%]	Ion Inject Time [ms]	RT [min]	First Scan	Spectrum File	File ID	XCorr	Percolator q-Value	Percolator PEP
		FALSE	High	Sequest HT (A2)	Unambiguous	QSSFEIPDDVPLPAGWEmAK	M18(Oxidation)	1	1	P46937	P46937	0	2	0.6935	0	1	1	1117.03	2233.06	2233.05	3.71	0.00414	HCD (High Energy Collision Dissociation)	MS2	0	45	42.6021	46781	WQR_1_20190806.raw	F4	3.85	0	0.002463
		FALSE	High	Sequest HT (A2)	Unambiguous	QSSFEIPDDVPLPAGWEmAK	M18(Oxidation)	1	1	P46937	P46937	0	2	0.678	0	1	1	1117.03	2233.05	2233.05	2.29	0.00255	HCD (High Energy Collision Dissociation)	MS2	14.4781	25.102	50.9565	56334	WQR_1_20190806.raw	F4	2.36	0	0.02039
		FALSE	High	Sequest HT (A2)	Unambiguous	QSSFEIPDDVPLPAGWEmAK	M18(Oxidation)	1	1	P46937	P46937	0	2	0.7617	0	1	1	1117.03	2233.05	2233.05	1.85	0.00207	HCD (High Energy Collision Dissociation)	MS2	0	45	45.1081	49716	WQR_1_20190806.raw	F4	3.86	0	0.005113
		FALSE	High	Sequest HT (A2)	Unambiguous	QSSFEIPDDVPLPAGWEmAK	M18(Oxidation)	1	1	P46937	P46937	0	2	0.6416	0	1	1	1117.03	2233.05	2233.05	0.43	0.00048	HCD (High Energy Collision Dissociation)	MS2	11.5594	32.982	46.4836	51310	WQR_1_20190806.raw	F4	3.32	0	0.01938
		FALSE	High	Sequest HT (A2)	Unambiguous	QSSFEIPDDVPLPAGWEmAK	M18(Oxidation)	1	1	P46937	P46937	0	2	0.7576	0	1	1	1117.03	2233.05	2233.05	2.94	0.00329	HCD (High Energy Collision Dissociation)	MS2	0	45	46.4469	51270	WQR_1_20190806.raw	F4	4.29	0.0007925	0.02916
		FALSE	High	Sequest HT (A2)	Unambiguous	QSSFEIPDDVPLPAGWEmAK	M18(Oxidation)	1	1	P46937	P46937	0	2	0.7035	0	1	1	1117.02	2233.04	2233.05	-2.63	-0.00294	HCD (High Energy Collision Dissociation)	MS2	0	45	47.9496	52997	WQR_1_20190806.raw	F4	3.71	0.0075	0.2761
	FALSE	High	QSSFEIPDDVPLPAGWEMAK		0.000548515	0	1	1	5	P46937	0	2217.05	High	0	0.0004267	4.64
		Checked	Confidence	Identifying Node	PSM Ambiguity	Annotated Sequence	Modifications	# Protein Groups	# Proteins	Master Protein Accessions	Protein Accessions	# Missed Cleavages	Charge	DeltaScore	DeltaCn	Rank	Search Engine Rank	m/z [Da]	MH+ [Da]	Theo. MH+ [Da]	DeltaM [ppm]	Deltam/z [Da]	Activation Type	MS Order	Isolation Interference [%]	Ion Inject Time [ms]	RT [min]	First Scan	Spectrum File	File ID	XCorr	Percolator q-Value	Percolator PEP
		FALSE	High	Sequest HT (A2)	Unambiguous	QSSFEIPDDVPLPAGWEMAK		1	1	P46937	P46937	0	2	0.7751	0	1	1	1109.03	2217.06	2217.05	1.33	0.00148	HCD (High Energy Collision Dissociation)	MS2	0	15.426	48.0466	53116	WQR_1_20190806.raw	F4	4.58	0	0.0009425
		FALSE	High	Sequest HT (A2)	Unambiguous	QSSFEIPDDVPLPAGWEMAK		1	1	P46937	P46937	0	2	0.7845	0	1	1	1109.03	2217.05	2217.05	-0.98	-0.00109	HCD (High Energy Collision Dissociation)	MS2	0	31.278	48.0424	53112	WQR_1_20190806.raw	F4	4.64	0	0.0004267
		FALSE	High	Sequest HT (A2)	Unambiguous	QSSFEIPDDVPLPAGWEMAK		1	1	P46937	P46937	0	2	0.6454	0	1	1	1109.04	2217.06	2217.05	4.75	0.00526	HCD (High Energy Collision Dissociation)	MS2	57.998	21.407	53.2178	58826	WQR_1_20190806.raw	F4	2.51	0.0007925	0.05319
		FALSE	High	Sequest HT (A2)	Unambiguous	QSSFEIPDDVPLPAGWEMAK		1	1	P46937	P46937	0	2	0.6222	0	1	1	1109.04	2217.06	2217.05	4.75	0.00526	HCD (High Energy Collision Dissociation)	MS2	49.7507	31.02	53.2172	58825	WQR_1_20190806.raw	F4	2.25	0.002119	0.1354
		FALSE	High	Sequest HT (A2)	Unambiguous	QSSFEIPDDVPLPAGWEMAK		1	1	P46937	P46937	0	2	0.705	0	1	1	1109.03	2217.06	2217.05	1.33	0.00148	HCD (High Energy Collision Dissociation)	MS2	0	13.888	48.0472	53117	WQR_1_20190806.raw	F4	3.83	0.00453	0.2344
	FALSE	High	QPPPLAPQSPQGGVMGGSNSNQQQQMR	2xOxidation [M15; M26]	0.000267936	0	1	1	1	P46937	0	2851.32	High	0	0.0002019	6.42
		Checked	Confidence	Identifying Node	PSM Ambiguity	Annotated Sequence	Modifications	# Protein Groups	# Proteins	Master Protein Accessions	Protein Accessions	# Missed Cleavages	Charge	DeltaScore	DeltaCn	Rank	Search Engine Rank	m/z [Da]	MH+ [Da]	Theo. MH+ [Da]	DeltaM [ppm]	Deltam/z [Da]	Activation Type	MS Order	Isolation Interference [%]	Ion Inject Time [ms]	RT [min]	First Scan	Spectrum File	File ID	XCorr	Percolator q-Value	Percolator PEP
		FALSE	High	Sequest HT (A2)	Unambiguous	QPPPLAPQSPQGGVmGGSNSNQQQQmR	M15(Oxidation); M26(Oxidation)	1	1	P46937	P46937	0	3	0.8037	0	1	1	951.114	2851.33	2851.32	2.34	0.00222	HCD (High Energy Collision Dissociation)	MS2	0	45	16.0189	14721	WQR_1_20190806.raw	F4	6.42	0	0.0002019
	FALSE	High	SQLPTLEQDGGTQNPVSSPGMSQELR	1xPhospho [S18]; 1xOxidation [M21]	0.00498616	0	1	1	1	P46937	0	2852.28	High	0	0.004251	4.9
		Checked	Confidence	Identifying Node	PSM Ambiguity	Annotated Sequence	Modifications	# Protein Groups	# Proteins	Master Protein Accessions	Protein Accessions	# Missed Cleavages	Charge	DeltaScore	DeltaCn	Rank	Search Engine Rank	m/z [Da]	MH+ [Da]	Theo. MH+ [Da]	DeltaM [ppm]	Deltam/z [Da]	Activation Type	MS Order	Isolation Interference [%]	Ion Inject Time [ms]	RT [min]	First Scan	Spectrum File	File ID	XCorr	Percolator q-Value	Percolator PEP
		FALSE	High	Sequest HT (A2)	Unambiguous	SQLPTLEQDGGTQNPVSsPGmSQELR	S18(Phospho); M21(Oxidation)	1	1	P46937	P46937	0	3	0.0633	0	1	1	951.433	2852.28	2852.28	2.15	0.00204	HCD (High Energy Collision Dissociation)	MS2		45	29.2891	30682	WQR_1_20190806.raw	F4	4.9	0	0.004251
	FALSE	High	SQLPTLEQDGGTQNPVSSPGMSQELR	1xPhospho [S]	8.7121e-05	0	1	1	9	P46937	0	2836.28	High	0	0.002283	6.35
		Checked	Confidence	Identifying Node	PSM Ambiguity	Annotated Sequence	Modifications	# Protein Groups	# Proteins	Master Protein Accessions	Protein Accessions	# Missed Cleavages	Charge	DeltaScore	DeltaCn	Rank	Search Engine Rank	m/z [Da]	MH+ [Da]	Theo. MH+ [Da]	DeltaM [ppm]	Deltam/z [Da]	Activation Type	MS Order	Isolation Interference [%]	Ion Inject Time [ms]	RT [min]	First Scan	Spectrum File	File ID	XCorr	Percolator q-Value	Percolator PEP
		FALSE	High	Sequest HT (A2)	Unambiguous	SQLPTLEQDGGTQNPVSsPGMSQELR	S18(Phospho)	1	1	P46937	P46937	0	2	0.0245	0	1	1	1418.64	2836.28	2836.28	-0.12	-0.00018	HCD (High Energy Collision Dissociation)	MS2	55.5919	45	33.4666	35873	WQR_1_20190806.raw	F4	3.68	0	0.006976
		FALSE	High	Sequest HT (A2)	Unambiguous	SQLPTLEQDGGTQNPVsSPGMSQELR	S17(Phospho)	1	1	P46937	P46937	0	2		0.0245	2	2	1418.64	2836.28	2836.28	-0.12	-0.00018	HCD (High Energy Collision Dissociation)	MS2	55.5919	45	33.4666	35873	WQR_1_20190806.raw	F4	3.59	0	0.01929
		FALSE	High	Sequest HT (A2)	Unambiguous	SQLPTLEQDGGTQNPVsSPGMSQELR	S17(Phospho)	1	1	P46937	P46937	0	2		0.0032	2	2	1418.64	2836.28	2836.28	-2.28	-0.00323	HCD (High Energy Collision Dissociation)	MS2	54.1789	45	33.4018	35800	WQR_1_20190806.raw	F4	6.18	0	0.0002673
		FALSE	High	Sequest HT (A2)	Unambiguous	SQLPTLEQDGGTQNPVSsPGMSQELR	S18(Phospho)	1	1	P46937	P46937	0	2	0.0032	0	1	1	1418.64	2836.28	2836.28	-2.28	-0.00323	HCD (High Energy Collision Dissociation)	MS2	54.1789	45	33.4018	35800	WQR_1_20190806.raw	F4	6.2	0	6.282e-05
		FALSE	High	Sequest HT (A2)	Unambiguous	SQLPTLEQDGGTQNPVSsPGMSQELR	S18(Phospho)	1	1	P46937	P46937	0	3	0.0265	0	1	1	946.101	2836.29	2836.28	2.13	0.00201	HCD (High Energy Collision Dissociation)	MS2	0	45	33.217	35592	WQR_1_20190806.raw	F4	4.9	0	0.00704
		FALSE	High	Sequest HT (A2)	Unambiguous	SQLPTLEQDGGTQNPVsSPGMSQELR	S17(Phospho)	1	1	P46937	P46937	0	3		0.0265	2	2	946.101	2836.29	2836.28	2.13	0.00201	HCD (High Energy Collision Dissociation)	MS2	0	45	33.217	35592	WQR_1_20190806.raw	F4	4.77	0	0.01954
		FALSE	High	Sequest HT (A2)	Unambiguous	SQLPTLEQDGGTQNPVSsPGMSQELR	S18(Phospho)	1	1	P46937	P46937	0	3	0.0472	0	1	1	946.101	2836.29	2836.28	1.81	0.00171	HCD (High Energy Collision Dissociation)	MS2	0	42.256	33.3003	35687	WQR_1_20190806.raw	F4	6.35	0	0.002283
		FALSE	High	Sequest HT (A2)	Unambiguous	SQLPTLEQDGGTQNPVsSPGMSQELR	S17(Phospho)	1	1	P46937	P46937	0	3		0.0472	2	2	946.101	2836.29	2836.28	1.81	0.00171	HCD (High Energy Collision Dissociation)	MS2	0	42.256	33.3003	35687	WQR_1_20190806.raw	F4	6.05	0	0.006942
		FALSE	High	Sequest HT (A2)	Unambiguous	SQLPTLEQDGGTQNPVSsPGMSQELR	S18(Phospho)	1	1	P46937	P46937	0	3	0.0694	0	1	1	946.101	2836.29	2836.28	2.78	0.00263	HCD (High Energy Collision Dissociation)	MS2	41.4078	45	33.7229	36182	WQR_1_20190806.raw	F4	3.6	0.0007925	0.0332
	FALSE	High	SQLPTLEQDGGTQNPVSSPGMSQELR	1xOxidation [M21]	0.000318801	0	1	1	4	P46937	0	2772.31	High	0	0.0003182	4.92
		Checked	Confidence	Identifying Node	PSM Ambiguity	Annotated Sequence	Modifications	# Protein Groups	# Proteins	Master Protein Accessions	Protein Accessions	# Missed Cleavages	Charge	DeltaScore	DeltaCn	Rank	Search Engine Rank	m/z [Da]	MH+ [Da]	Theo. MH+ [Da]	DeltaM [ppm]	Deltam/z [Da]	Activation Type	MS Order	Isolation Interference [%]	Ion Inject Time [ms]	RT [min]	First Scan	Spectrum File	File ID	XCorr	Percolator q-Value	Percolator PEP
		FALSE	High	Sequest HT (A2)	Unambiguous	SQLPTLEQDGGTQNPVSSPGmSQELR	M21(Oxidation)	1	1	P46937	P46937	0	3	0.7033	0	1	1	924.775	2772.31	2772.31	0.41	0.00038	HCD (High Energy Collision Dissociation)	MS2	0	10.157	27.5192	28542	WQR_1_20190806.raw	F4	4.92	0	0.0003182
		FALSE	High	Sequest HT (A2)	Unambiguous	SQLPTLEQDGGTQNPVSSPGmSQELR	M21(Oxidation)	1	1	P46937	P46937	0	3	0.6857	0	1	1	924.777	2772.32	2772.31	2.39	0.00221	HCD (High Energy Collision Dissociation)	MS2	5.08482	9.752	27.5354	28564	WQR_1_20190806.raw	F4	4.55	0	0.0002422
		FALSE	High	Sequest HT (A2)	Unambiguous	SQLPTLEQDGGTQNPVSSPGmSQELR	M21(Oxidation)	1	1	P46937	P46937	0	3	0.7029	0	1	1	924.775	2772.31	2772.31	0.02	1e-05	HCD (High Energy Collision Dissociation)	MS2	19.988	7.39	27.6676	28736	WQR_1_20190806.raw	F4	4.78	0	0.0009134
		FALSE	High	Sequest HT (A2)	Unambiguous	SQLPTLEQDGGTQNPVSSPGmSQELR	M21(Oxidation)	1	1	P46937	P46937	0	3	0.6674	0	1	1	924.778	2772.32	2772.31	3.52	0.00325	HCD (High Energy Collision Dissociation)	MS2	47.4397	25.873	27.446	28445	WQR_1_20190806.raw	F4	4.33	0	0.002675
	FALSE	High	SQLPTLEQDGGTQNPVSSPGMSQELR		0.000261207	0	1	1	1	P46937	0	2756.32	High	0	0.0001966	5.25
		Checked	Confidence	Identifying Node	PSM Ambiguity	Annotated Sequence	Modifications	# Protein Groups	# Proteins	Master Protein Accessions	Protein Accessions	# Missed Cleavages	Charge	DeltaScore	DeltaCn	Rank	Search Engine Rank	m/z [Da]	MH+ [Da]	Theo. MH+ [Da]	DeltaM [ppm]	Deltam/z [Da]	Activation Type	MS Order	Isolation Interference [%]	Ion Inject Time [ms]	RT [min]	First Scan	Spectrum File	File ID	XCorr	Percolator q-Value	Percolator PEP
		FALSE	High	Sequest HT (A2)	Unambiguous	SQLPTLEQDGGTQNPVSSPGMSQELR		1	1	P46937	P46937	0	3	0.6952	0	1	1	919.445	2756.32	2756.32	1.78	0.00164	HCD (High Energy Collision Dissociation)	MS2	4.84613	30.901	31.3217	33203	WQR_1_20190806.raw	F4	5.25	0	0.0001966
	FALSE	High	QPPPLAPQSPQGGVMGGSNSNQQQQMR	1xOxidation [M]	2.65826e-05	0	1	1	3	P46937	0	2835.33	High	0	0.0003082	7.29
		Checked	Confidence	Identifying Node	PSM Ambiguity	Annotated Sequence	Modifications	# Protein Groups	# Proteins	Master Protein Accessions	Protein Accessions	# Missed Cleavages	Charge	DeltaScore	DeltaCn	Rank	Search Engine Rank	m/z [Da]	MH+ [Da]	Theo. MH+ [Da]	DeltaM [ppm]	Deltam/z [Da]	Activation Type	MS Order	Isolation Interference [%]	Ion Inject Time [ms]	RT [min]	First Scan	Spectrum File	File ID	XCorr	Percolator q-Value	Percolator PEP
		FALSE	High	Sequest HT (A2)	Unambiguous	QPPPLAPQSPQGGVmGGSNSNQQQQMR	M15(Oxidation)	1	1	P46937	P46937	0	3	0.5189	0	1	1	945.786	2835.34	2835.33	6.52	0.00616	HCD (High Energy Collision Dissociation)	MS2		45	22.6071	22519	WQR_1_20190806.raw	F4	5.3	0	0.01694
		FALSE	High	Sequest HT (A2)	Unambiguous	QPPPLAPQSPQGGVMGGSNSNQQQQmR	M26(Oxidation)	1	1	P46937	P46937	0	3	0.3388	0	1	1	945.783	2835.33	2835.33	2.97	0.00281	HCD (High Energy Collision Dissociation)	MS2	0	45	20.4542	19897	WQR_1_20190806.raw	F4	7.29	0	0.0003082
		FALSE	High	Sequest HT (A2)	Unambiguous	QPPPLAPQSPQGGVmGGSNSNQQQQMR	M15(Oxidation)	1	1	P46937	P46937	0	3	0.4304	0	1	1	945.78	2835.32	2835.33	-0.71	-0.00067	HCD (High Energy Collision Dissociation)	MS2	0	45	18.1729	17222	WQR_1_20190806.raw	F4	6.9	0	1.818e-05
	FALSE	High	QPPPLAPQSPQGGVMGGSNSNQQQQMR		3.13798e-06	0	1	1	3	P46937	0	2819.33	High	0	1.97e-06	7.64
		Checked	Confidence	Identifying Node	PSM Ambiguity	Annotated Sequence	Modifications	# Protein Groups	# Proteins	Master Protein Accessions	Protein Accessions	# Missed Cleavages	Charge	DeltaScore	DeltaCn	Rank	Search Engine Rank	m/z [Da]	MH+ [Da]	Theo. MH+ [Da]	DeltaM [ppm]	Deltam/z [Da]	Activation Type	MS Order	Isolation Interference [%]	Ion Inject Time [ms]	RT [min]	First Scan	Spectrum File	File ID	XCorr	Percolator q-Value	Percolator PEP
		FALSE	High	Sequest HT (A2)	Unambiguous	QPPPLAPQSPQGGVMGGSNSNQQQQMR		1	1	P46937	P46937	0	3	0.649	0	1	1	940.45	2819.34	2819.33	1.73	0.00162	HCD (High Energy Collision Dissociation)	MS2	0	10.037	22.4055	22273	WQR_1_20190806.raw	F4	4.9	0	0.02294
		FALSE	High	Sequest HT (A2)	Unambiguous	QPPPLAPQSPQGGVMGGSNSNQQQQMR		1	1	P46937	P46937	0	3	0.793	0	1	1	940.452	2819.34	2819.33	3.61	0.00339	HCD (High Energy Collision Dissociation)	MS2	18.2911	34.155	22.3414	22195	WQR_1_20190806.raw	F4	7.15	0	2.954e-05
		FALSE	High	Sequest HT (A2)	Unambiguous	QPPPLAPQSPQGGVMGGSNSNQQQQMR		1	1	P46937	P46937	0	3	0.7997	0	1	1	940.45	2819.33	2819.33	1.08	0.00101	HCD (High Energy Collision Dissociation)	MS2	64.5197	45	22.3255	22176	WQR_1_20190806.raw	F4	7.64	0	1.97e-06
	FALSE	High	QASTDAGTAGALTPQHVR	1xPhospho [T/S]	0.000908391	0	1	1	12	P46937	0	1860.86	High	0	0.0007209	4.92
		Checked	Confidence	Identifying Node	PSM Ambiguity	Annotated Sequence	Modifications	# Protein Groups	# Proteins	Master Protein Accessions	Protein Accessions	# Missed Cleavages	Charge	DeltaScore	DeltaCn	Rank	Search Engine Rank	m/z [Da]	MH+ [Da]	Theo. MH+ [Da]	DeltaM [ppm]	Deltam/z [Da]	Activation Type	MS Order	Isolation Interference [%]	Ion Inject Time [ms]	RT [min]	First Scan	Spectrum File	File ID	XCorr	Percolator q-Value	Percolator PEP
		FALSE	High	Sequest HT (A2)	Unambiguous	QAsTDAGTAGALTPQHVR	S3(Phospho)	1	1	P46937	P46937	0	2	0.0328	0	1	1	930.934	1860.86	1860.86	0.88	0.00082	HCD (High Energy Collision Dissociation)	MS2	0	45	15.136	13721	WQR_1_20190806.raw	F4	3.35	0	0.005343
		FALSE	High	Sequest HT (A2)	Unambiguous	QAStDAGTAGALTPQHVR	T4(Phospho)	1	1	P46937	P46937	0	2		0.0328	2	2	930.934	1860.86	1860.86	0.88	0.00082	HCD (High Energy Collision Dissociation)	MS2	0	45	15.136	13721	WQR_1_20190806.raw	F4	3.24	0	0.006273
		FALSE	High	Sequest HT (A2)	Unambiguous	QAsTDAGTAGALTPQHVR	S3(Phospho)	1	1	P46937	P46937	0	3	0.012	0	1	1	620.96	1860.86	1860.86	2.19	0.00136	HCD (High Energy Collision Dissociation)	MS2	0	45	15.6282	14277	WQR_1_20190806.raw	F4	4.15	0	0.001983
		FALSE	High	Sequest HT (A2)	Unambiguous	QAStDAGTAGALTPQHVR	T4(Phospho)	1	1	P46937	P46937	0	3		0.012	2	2	620.96	1860.86	1860.86	2.19	0.00136	HCD (High Energy Collision Dissociation)	MS2	0	45	15.6282	14277	WQR_1_20190806.raw	F4	4.1	0	0.002033
		FALSE	High	Sequest HT (A2)	Unambiguous	QASTDAGtAGALTPQHVR	T8(Phospho)	1	1	P46937	P46937	0	3		0.0386	3	3	620.96	1860.86	1860.86	2.19	0.00136	HCD (High Energy Collision Dissociation)	MS2	0	45	15.6282	14277	WQR_1_20190806.raw	F4	3.99	0	0.006728
		FALSE	High	Sequest HT (A2)	Unambiguous	QAsTDAGTAGALTPQHVR	S3(Phospho)	1	1	P46937	P46937	0	3	0.0168	0	1	1	620.96	1860.86	1860.86	2.19	0.00136	HCD (High Energy Collision Dissociation)	MS2	0	45	15.6292	14278	WQR_1_20190806.raw	F4	4.16	0	0.004084
		FALSE	High	Sequest HT (A2)	Unambiguous	QAStDAGTAGALTPQHVR	T4(Phospho)	1	1	P46937	P46937	0	3		0.0168	2	2	620.96	1860.86	1860.86	2.19	0.00136	HCD (High Energy Collision Dissociation)	MS2	0	45	15.6292	14278	WQR_1_20190806.raw	F4	4.09	0	0.00412
		FALSE	High	Sequest HT (A2)	Unambiguous	QAStDAGTAGALTPQHVR	T4(Phospho)	1	1	P46937	P46937	0	3	0.05	0	1	1	620.957	1860.86	1860.86	-1.26	-0.00078	HCD (High Energy Collision Dissociation)	MS2	0	45	15.7346	14398	WQR_1_20190806.raw	F4	4.4	0	0.00397
		FALSE	High	Sequest HT (A2)	Unambiguous	QAsTDAGTAGALTPQHVR	S3(Phospho)	1	1	P46937	P46937	0	3	0.05	0	1	2	620.957	1860.86	1860.86	-1.26	-0.00078	HCD (High Energy Collision Dissociation)	MS2	0	45	15.7346	14398	WQR_1_20190806.raw	F4	4.4	0	0.003976
		FALSE	High	Sequest HT (A2)	Unambiguous	QASTDAGtAGALTPQHVR	T8(Phospho)	1	1	P46937	P46937	0	3		0.05	3	3	620.957	1860.86	1860.86	-1.26	-0.00078	HCD (High Energy Collision Dissociation)	MS2	0	45	15.7346	14398	WQR_1_20190806.raw	F4	4.18	0	0.006818
		FALSE	High	Sequest HT (A2)	Unambiguous	QAsTDAGTAGALTPQHVR	S3(Phospho)	1	1	P46937	P46937	0	2	0.1118	0	1	1	930.935	1860.86	1860.86	1.41	0.00131	HCD (High Energy Collision Dissociation)	MS2	0	35.309	15.9068	14593	WQR_1_20190806.raw	F4	4.92	0	0.0007209
		FALSE	High	Sequest HT (A2)	Unambiguous	QAsTDAGTAGALTPQHVR	S3(Phospho)	1	1	P46937	P46937	0	2	0.0716	0	1	1	930.936	1860.86	1860.86	2.06	0.00192	HCD (High Energy Collision Dissociation)	MS2	0	45	15.957	14650	WQR_1_20190806.raw	F4	3.91	0	0.0008857
	FALSE	High	QASTDAGTAGALTPQHVR		1.66046e-05	0	1	1	11	P46937	0	1780.89	High	0	1.116e-05	5.38
		Checked	Confidence	Identifying Node	PSM Ambiguity	Annotated Sequence	Modifications	# Protein Groups	# Proteins	Master Protein Accessions	Protein Accessions	# Missed Cleavages	Charge	DeltaScore	DeltaCn	Rank	Search Engine Rank	m/z [Da]	MH+ [Da]	Theo. MH+ [Da]	DeltaM [ppm]	Deltam/z [Da]	Activation Type	MS Order	Isolation Interference [%]	Ion Inject Time [ms]	RT [min]	First Scan	Spectrum File	File ID	XCorr	Percolator q-Value	Percolator PEP
		FALSE	High	Sequest HT (A2)	Unambiguous	QASTDAGTAGALTPQHVR		1	1	P46937	P46937	0	3	0.6368	0	1	1	594.303	1780.9	1780.89	0.93	0.00055	HCD (High Energy Collision Dissociation)	MS2	73.5066	45	14.2614	12715	WQR_1_20190806.raw	F4	4.02	0	0.0004792
		FALSE	High	Sequest HT (A2)	Unambiguous	QASTDAGTAGALTPQHVR		1	1	P46937	P46937	0	3	0.7329	0	1	1	594.303	1780.9	1780.89	1.23	0.00073	HCD (High Energy Collision Dissociation)	MS2	0.25474	0.382	13.6472	11996	WQR_1_20190806.raw	F4	4.68	0	0.01422
		FALSE	High	Sequest HT (A2)	Unambiguous	QASTDAGTAGALTPQHVR		1	1	P46937	P46937	0	2	0.8048	0	1	1	890.951	1780.89	1780.89	0.66	0.00059	HCD (High Energy Collision Dissociation)	MS2	0	2.461	13.6478	11997	WQR_1_20190806.raw	F4	5.38	0	1.116e-05
		FALSE	High	Sequest HT (A2)	Unambiguous	QASTDAGTAGALTPQHVR		1	1	P46937	P46937	0	2	0.7976	0	1	1	890.951	1780.89	1780.89	0.66	0.00059	HCD (High Energy Collision Dissociation)	MS2	0	2.543	13.6484	11998	WQR_1_20190806.raw	F4	4.99	0	2.598e-05
		FALSE	High	Sequest HT (A2)	Unambiguous	QASTDAGTAGALTPQHVR		1	1	P46937	P46937	0	2	0.7443	0	1	1	890.951	1780.89	1780.89	0.66	0.00059	HCD (High Energy Collision Dissociation)	MS2	0	5.28	13.6496	12000	WQR_1_20190806.raw	F4	4.81	0	0.0002481
		FALSE	High	Sequest HT (A2)	Unambiguous	QASTDAGTAGALTPQHVR		1	1	P46937	P46937	0	2	0.7132	0	1	1	890.951	1780.89	1780.89	0.25	0.00022	HCD (High Energy Collision Dissociation)	MS2	0	41.415	13.6551	12006	WQR_1_20190806.raw	F4	4.01	0	0.0005011
		FALSE	High	Sequest HT (A2)	Unambiguous	QASTDAGTAGALTPQHVR		1	1	P46937	P46937	0	2	0.6793	0	1	1	890.951	1780.9	1780.89	0.86	0.00077	HCD (High Energy Collision Dissociation)	MS2	0	45	13.6875	12047	WQR_1_20190806.raw	F4	3.68	0	0.005949
		FALSE	High	Sequest HT (A2)	Unambiguous	QASTDAGTAGALTPQHVR		1	1	P46937	P46937	0	3	0.7051	0	1	1	594.303	1780.89	1780.89	0.62	0.00037	HCD (High Energy Collision Dissociation)	MS2	1.79344	1.384	13.5818	11919	WQR_1_20190806.raw	F4	4.95	0	0.002449
		FALSE	High	Sequest HT (A2)	Unambiguous	QASTDAGTAGALTPQHVR		1	1	P46937	P46937	0	3	0.681	0	1	1	594.305	1780.9	1780.89	3.19	0.00189	HCD (High Energy Collision Dissociation)	MS2	55.3843	12.031	13.4998	11820	WQR_1_20190806.raw	F4	3.26	0	0.002761
		FALSE	High	Sequest HT (A2)	Unambiguous	QASTDAGTAGALTPQHVR		1	1	P46937	P46937	0	3	0.643	0	1	1	594.303	1780.9	1780.89	0.93	0.00055	HCD (High Energy Collision Dissociation)	MS2	40.0651	10.318	13.5256	11851	WQR_1_20190806.raw	F4	4.09	0	0.00124
		FALSE	High	Sequest HT (A2)	Unambiguous	QASTDAGTAGALTPQHVR		1	1	P46937	P46937	0	3	0.6735	0	1	1	594.303	1780.9	1780.89	1.23	0.00073	HCD (High Energy Collision Dissociation)	MS2	0.564718	0.872	13.6508	12002	WQR_1_20190806.raw	F4	4.38	0.0007925	0.03302
	FALSE	High	YFLNHIDQTTTWQDPR		0.000908391	0	1	1	9	P46937	0	2034.97	High	0	0.001029	5.21
		Checked	Confidence	Identifying Node	PSM Ambiguity	Annotated Sequence	Modifications	# Protein Groups	# Proteins	Master Protein Accessions	Protein Accessions	# Missed Cleavages	Charge	DeltaScore	DeltaCn	Rank	Search Engine Rank	m/z [Da]	MH+ [Da]	Theo. MH+ [Da]	DeltaM [ppm]	Deltam/z [Da]	Activation Type	MS Order	Isolation Interference [%]	Ion Inject Time [ms]	RT [min]	First Scan	Spectrum File	File ID	XCorr	Percolator q-Value	Percolator PEP
		FALSE	High	Sequest HT (A2)	Unambiguous	YFLNHIDQTTTWQDPR		1	1	P46937	P46937	0	3	0.4829	0	1	1	678.996	2034.97	2034.97	2.86	0.00194	HCD (High Energy Collision Dissociation)	MS2	65.3831	7.748	30.4212	32059	WQR_1_20190806.raw	F4	3.21	0	0.001383
		FALSE	High	Sequest HT (A2)	Unambiguous	YFLNHIDQTTTWQDPR		1	1	P46937	P46937	0	3	0.5881	0	1	1	678.996	2034.97	2034.97	2.86	0.00194	HCD (High Energy Collision Dissociation)	MS2	64.7797	9.139	30.4218	32060	WQR_1_20190806.raw	F4	3.86	0	0.00168
		FALSE	High	Sequest HT (A2)	Unambiguous	YFLNHIDQTTTWQDPR		1	1	P46937	P46937	0	3	0.6353	0	1	1	678.995	2034.97	2034.97	1.33	0.0009	HCD (High Energy Collision Dissociation)	MS2	45.3778	6.839	30.4377	32080	WQR_1_20190806.raw	F4	5.21	0	0.001029
		FALSE	High	Sequest HT (A2)	Unambiguous	YFLNHIDQTTTWQDPR		1	1	P46937	P46937	0	3	0.6432	0	1	1	678.995	2034.97	2034.97	1.33	0.0009	HCD (High Energy Collision Dissociation)	MS2	22.5144	5.621	30.448	32092	WQR_1_20190806.raw	F4	4.4	0	0.005864
		FALSE	High	Sequest HT (A2)	Unambiguous	YFLNHIDQTTTWQDPR		1	1	P46937	P46937	0	3	0.6247	0	1	1	678.996	2034.97	2034.97	2.59	0.00176	HCD (High Energy Collision Dissociation)	MS2	0.125942	0.105	31.2065	33054	WQR_1_20190806.raw	F4	4.05	0	0.0007217
		FALSE	High	Sequest HT (A2)	Unambiguous	YFLNHIDQTTTWQDPR		1	1	P46937	P46937	0	3	0.5094	0	1	1	678.997	2034.98	2034.97	5.47	0.00371	HCD (High Energy Collision Dissociation)	MS2	4.50442	9.488	34.4628	37106	WQR_1_20190806.raw	F4	4.24	0	0.0009416
		FALSE	High	Sequest HT (A2)	Unambiguous	YFLNHIDQTTTWQDPR		1	1	P46937	P46937	0	3	0.5026	0	1	1	678.994	2034.97	2034.97	0.07	5e-05	HCD (High Energy Collision Dissociation)	MS2	71.6864	6.822	32.2717	34384	WQR_1_20190806.raw	F4	1.93	0	0.0166
		FALSE	High	Sequest HT (A2)	Unambiguous	YFLNHIDQTTTWQDPR		1	1	P46937	P46937	0	3	0.614	0	1	1	678.997	2034.98	2034.97	5.29	0.00359	HCD (High Energy Collision Dissociation)	MS2	11.3791	4.374	31.4133	33319	WQR_1_20190806.raw	F4	3.99	0	0.003636
		FALSE	High	Sequest HT (A2)	Unambiguous	YFLNHIDQTTTWQDPR		1	1	P46937	P46937	0	3	0.5289	0	1	1	678.997	2034.98	2034.97	5.29	0.00359	HCD (High Energy Collision Dissociation)	MS2	2.78779	4.116	31.4151	33322	WQR_1_20190806.raw	F4	3.46	0	0.003058
	FALSE	High	AHSSPASLQLGAVSPGTLTPTGVVSGPAATPTAQHLR	1xPhospho [T/S]	6.05038e-05	0	1	1	2	P46937	0	3614.83	High	0	4.289e-05	11.93
		Checked	Confidence	Identifying Node	PSM Ambiguity	Annotated Sequence	Modifications	# Protein Groups	# Proteins	Master Protein Accessions	Protein Accessions	# Missed Cleavages	Charge	DeltaScore	DeltaCn	Rank	Search Engine Rank	m/z [Da]	MH+ [Da]	Theo. MH+ [Da]	DeltaM [ppm]	Deltam/z [Da]	Activation Type	MS Order	Isolation Interference [%]	Ion Inject Time [ms]	RT [min]	First Scan	Spectrum File	File ID	XCorr	Percolator q-Value	Percolator PEP
		FALSE	High	Sequest HT (A2)	Unambiguous	AHSSPASLQLGAVsPGTLTPTGVVSGPAATPTAQHLR	S14(Phospho)	1	1	P46937	P46937	0	4	0.0436	0	1	1	904.463	3614.83	3614.83	-0.67	-0.00061	HCD (High Energy Collision Dissociation)	MS2	0	45	35.7021	38612	WQR_1_20190806.raw	F4	11.93	0	4.289e-05
		FALSE	High	Sequest HT (A2)	Unambiguous	AHSSPASLQLGAVSPGtLTPTGVVSGPAATPTAQHLR	T17(Phospho)	1	1	P46937	P46937	0	4		0.0436	2	2	904.463	3614.83	3614.83	-0.67	-0.00061	HCD (High Energy Collision Dissociation)	MS2	0	45	35.7021	38612	WQR_1_20190806.raw	F4	11.41	0	5.524e-05
	FALSE	High	AHSSPASLQLGAVSPGTLTPTGVVSGPAATPTAQHLR		1.35131e-08	0	1	1	7	P46937	0	3534.87	High	0	6.755e-09	10.44
		Checked	Confidence	Identifying Node	PSM Ambiguity	Annotated Sequence	Modifications	# Protein Groups	# Proteins	Master Protein Accessions	Protein Accessions	# Missed Cleavages	Charge	DeltaScore	DeltaCn	Rank	Search Engine Rank	m/z [Da]	MH+ [Da]	Theo. MH+ [Da]	DeltaM [ppm]	Deltam/z [Da]	Activation Type	MS Order	Isolation Interference [%]	Ion Inject Time [ms]	RT [min]	First Scan	Spectrum File	File ID	XCorr	Percolator q-Value	Percolator PEP
		FALSE	High	Sequest HT (A2)	Unambiguous	AHSSPASLQLGAVSPGTLTPTGVVSGPAATPTAQHLR		1	1	P46937	P46937	0	3	0.7065	0	1	1	1178.95	3534.85	3534.87	-5.77	-0.0068	HCD (High Energy Collision Dissociation)	MS2	60.3443	45	37.2718	40457	WQR_1_20190806.raw	F4	4.43	0	2.576e-05
		FALSE	High	Sequest HT (A2)	Unambiguous	AHSSPASLQLGAVSPGTLTPTGVVSGPAATPTAQHLR		1	1	P46937	P46937	0	4	0.7966	0	1	1	884.473	3534.87	3534.87	1.6	0.00141	HCD (High Energy Collision Dissociation)	MS2	0.253628	0.293	33.5701	35995	WQR_1_20190806.raw	F4	8.31	0	2.465e-07
		FALSE	High	Sequest HT (A2)	Unambiguous	AHSSPASLQLGAVSPGTLTPTGVVSGPAATPTAQHLR		1	1	P46937	P46937	0	4	0.7238	0	1	1	884.472	3534.87	3534.87	-0.27	-0.00024	HCD (High Energy Collision Dissociation)	MS2	39.6481	22.624	34.1025	36644	WQR_1_20190806.raw	F4	7.53	0	0.001382
		FALSE	High	Sequest HT (A2)	Unambiguous	AHSSPASLQLGAVSPGTLTPTGVVSGPAATPTAQHLR		1	1	P46937	P46937	0	4	0.814	0	1	1	884.474	3534.87	3534.87	2.36	0.00208	HCD (High Energy Collision Dissociation)	MS2	0.565504	0.253	33.4156	35817	WQR_1_20190806.raw	F4	8.71	0	2.824e-07
		FALSE	High	Sequest HT (A2)	Unambiguous	AHSSPASLQLGAVSPGTLTPTGVVSGPAATPTAQHLR		1	1	P46937	P46937	0	4	0.7002	0	1	1	884.474	3534.87	3534.87	2.22	0.00196	HCD (High Energy Collision Dissociation)	MS2	0	13.431	32.8012	35073	WQR_1_20190806.raw	F4	10.44	0	6.755e-09
		FALSE	High	Sequest HT (A2)	Unambiguous	AHSSPASLQLGAVSPGTLTPTGVVSGPAATPTAQHLR		1	1	P46937	P46937	0	4	0.6946	0	1	1	884.472	3534.87	3534.87	0.42	0.00038	HCD (High Energy Collision Dissociation)	MS2	2.37055	7.012	32.9743	35302	WQR_1_20190806.raw	F4	8.84	0	0.0007699
		FALSE	High	Sequest HT (A2)	Unambiguous	AHSSPASLQLGAVSPGTLTPTGVVSGPAATPTAQHLR		1	1	P46937	P46937	0	3	0.5611	0	1	1	1178.95	3534.85	3534.87	-5.15	-0.00607	HCD (High Energy Collision Dissociation)	MS2	94.5762	15.974	37.2306	40412	WQR_1_20190806.raw	F4	1.8	0.0007925	0.05883
	FALSE	High	DESTDSGLSMSSYSVPR	1xOxidation [M10]	3.89316e-05	0	1	1	4	P46937	0	1833.78	High	0	0.0003651	5.51
		Checked	Confidence	Identifying Node	PSM Ambiguity	Annotated Sequence	Modifications	# Protein Groups	# Proteins	Master Protein Accessions	Protein Accessions	# Missed Cleavages	Charge	DeltaScore	DeltaCn	Rank	Search Engine Rank	m/z [Da]	MH+ [Da]	Theo. MH+ [Da]	DeltaM [ppm]	Deltam/z [Da]	Activation Type	MS Order	Isolation Interference [%]	Ion Inject Time [ms]	RT [min]	First Scan	Spectrum File	File ID	XCorr	Percolator q-Value	Percolator PEP
		FALSE	High	Sequest HT (A2)	Unambiguous	DESTDSGLSmSSYSVPR	M10(Oxidation)	1	1	P46937	P46937	0	2	0.7985	0	1	1	917.394	1833.78	1833.78	0.39	0.00035	HCD (High Energy Collision Dissociation)	MS2	0	6.997	21.0598	20653	WQR_1_20190806.raw	F4	5.51	0	0.0003651
		FALSE	High	Sequest HT (A2)	Unambiguous	DESTDSGLSmSSYSVPR	M10(Oxidation)	1	1	P46937	P46937	0	2	0.7289	0	1	1	917.395	1833.78	1833.78	1.52	0.00139	HCD (High Energy Collision Dissociation)	MS2	0	25.967	21.1305	20752	WQR_1_20190806.raw	F4	4.39	0	0.0002458
		FALSE	High	Sequest HT (A2)	Unambiguous	DESTDSGLSmSSYSVPR	M10(Oxidation)	1	1	P46937	P46937	0	2	0.7806	0	1	1	917.395	1833.78	1833.78	1.45	0.00133	HCD (High Energy Collision Dissociation)	MS2	0	15.835	21.0799	20682	WQR_1_20190806.raw	F4	5.06	0	0.001142
		FALSE	High	Sequest HT (A2)	Unambiguous	DESTDSGLSmSSYSVPR	M10(Oxidation)	1	1	P46937	P46937	0	2	0.8036	0	1	1	917.395	1833.78	1833.78	1.45	0.00133	HCD (High Energy Collision Dissociation)	MS2	0	3.478	21.0788	20680	WQR_1_20190806.raw	F4	4.94	0	2.705e-05
	FALSE	High	DESTDSGLSMSSYSVPR		5.3278e-05	0	1	1	12	P46937	0	1817.79	High	0	4.268e-05	5.36
		Checked	Confidence	Identifying Node	PSM Ambiguity	Annotated Sequence	Modifications	# Protein Groups	# Proteins	Master Protein Accessions	Protein Accessions	# Missed Cleavages	Charge	DeltaScore	DeltaCn	Rank	Search Engine Rank	m/z [Da]	MH+ [Da]	Theo. MH+ [Da]	DeltaM [ppm]	Deltam/z [Da]	Activation Type	MS Order	Isolation Interference [%]	Ion Inject Time [ms]	RT [min]	First Scan	Spectrum File	File ID	XCorr	Percolator q-Value	Percolator PEP
		FALSE	High	Sequest HT (A2)	Unambiguous	DESTDSGLSMSSYSVPR		1	1	P46937	P46937	0	2	0.8064	0	1	1	909.399	1817.79	1817.79	2.49	0.00227	HCD (High Energy Collision Dissociation)	MS2	0	3.846	27.5318	28558	WQR_1_20190806.raw	F4	5.32	0	0.0003563
		FALSE	High	Sequest HT (A2)	Unambiguous	DESTDSGLSMSSYSVPR		1	1	P46937	P46937	0	2	0.7166	0	1	1	909.397	1817.79	1817.79	0.88	0.0008	HCD (High Energy Collision Dissociation)	MS2	0	10.677	27.5778	28620	WQR_1_20190806.raw	F4	4.87	0	0.0004761
		FALSE	High	Sequest HT (A2)	Unambiguous	DESTDSGLSMSSYSVPR		1	1	P46937	P46937	0	3	0.7294	0	1	1	606.6	1817.79	1817.79	0.57	0.00035	HCD (High Energy Collision Dissociation)	MS2	8.81598	14.409	27.5819	28627	WQR_1_20190806.raw	F4	4.36	0	0.0007118
		FALSE	High	Sequest HT (A2)	Unambiguous	DESTDSGLSMSSYSVPR		1	1	P46937	P46937	0	3	0.763	0	1	1	606.6	1817.79	1817.79	0.07	4e-05	HCD (High Energy Collision Dissociation)	MS2	0	4.191	27.5858	28631	WQR_1_20190806.raw	F4	3.84	0	0.0007602
		FALSE	High	Sequest HT (A2)	Unambiguous	DESTDSGLSMSSYSVPR		1	1	P46937	P46937	0	2	0.8041	0	1	1	909.397	1817.79	1817.79	0.81	0.00074	HCD (High Energy Collision Dissociation)	MS2	0	0.857	27.6013	28651	WQR_1_20190806.raw	F4	5.36	0	4.268e-05
		FALSE	High	Sequest HT (A2)	Unambiguous	DESTDSGLSMSSYSVPR		1	1	P46937	P46937	0	3	0.7412	0	1	1	606.601	1817.79	1817.79	0.87	0.00053	HCD (High Energy Collision Dissociation)	MS2	0	4.116	27.6054	28656	WQR_1_20190806.raw	F4	4.25	0	0.0009613
		FALSE	High	Sequest HT (A2)	Unambiguous	DESTDSGLSMSSYSVPR		1	1	P46937	P46937	0	2	0.6704	0	1	1	909.397	1817.79	1817.79	0.34	0.00031	HCD (High Energy Collision Dissociation)	MS2	0	14.558	27.619	28672	WQR_1_20190806.raw	F4	4.49	0	0.001404
		FALSE	High	Sequest HT (A2)	Unambiguous	DESTDSGLSMSSYSVPR		1	1	P46937	P46937	0	3	0.7645	0	1	1	606.6	1817.79	1817.79	0.37	0.00022	HCD (High Energy Collision Dissociation)	MS2	0	3.506	27.6439	28706	WQR_1_20190806.raw	F4	4.67	0	0.01367
		FALSE	High	Sequest HT (A2)	Unambiguous	DESTDSGLSMSSYSVPR		1	1	P46937	P46937	0	2	0.8366	0	1	1	909.397	1817.79	1817.79	0.34	0.00031	HCD (High Energy Collision Dissociation)	MS2	0	42.153	28.8189	30148	WQR_1_20190806.raw	F4	5.08	0	4.104e-05
		FALSE	High	Sequest HT (A2)	Unambiguous	DESTDSGLSMSSYSVPR		1	1	P46937	P46937	0	2	0.782	0	1	1	909.397	1817.79	1817.79	0.34	0.00031	HCD (High Energy Collision Dissociation)	MS2	0	45	28.8254	30155	WQR_1_20190806.raw	F4	5.32	0	0.0003897
		FALSE	High	Sequest HT (A2)	Unambiguous	DESTDSGLSMSSYSVPR		1	1	P46937	P46937	0	2	0.7227	0	1	1	909.393	1817.78	1817.79	-3.68	-0.00335	HCD (High Energy Collision Dissociation)	MS2	0	38.694	27.3008	28256	WQR_1_20190806.raw	F4	4.76	0	3.765e-05
		FALSE	High	Sequest HT (A2)	Unambiguous	DESTDSGLSMSSYSVPR		1	1	P46937	P46937	0	2	0.6602	0	1	1	909.396	1817.78	1817.79	-0.93	-0.00085	HCD (High Energy Collision Dissociation)	MS2	69.9792	15.658	26.5301	27293	WQR_1_20190806.raw	F4	3.59	0	5.03e-05
	FALSE	High	GDSETDLEALFNAVMNPK	1xPhospho [S3]	0.00838839	0	1	1	1	P46937	0	2030.88	High	0	0.007281	3.46
		Checked	Confidence	Identifying Node	PSM Ambiguity	Annotated Sequence	Modifications	# Protein Groups	# Proteins	Master Protein Accessions	Protein Accessions	# Missed Cleavages	Charge	DeltaScore	DeltaCn	Rank	Search Engine Rank	m/z [Da]	MH+ [Da]	Theo. MH+ [Da]	DeltaM [ppm]	Deltam/z [Da]	Activation Type	MS Order	Isolation Interference [%]	Ion Inject Time [ms]	RT [min]	First Scan	Spectrum File	File ID	XCorr	Percolator q-Value	Percolator PEP
		FALSE	High	Sequest HT (A2)	Unambiguous	GDsETDLEALFNAVMNPK	S3(Phospho)	1	1	P46937	P46937	0	2	0.0549	0	1	1	1015.94	2030.88	2030.88	-1.29	-0.00131	HCD (High Energy Collision Dissociation)	MS2	39.9193	45	57.8093	63409	WQR_1_20190806.raw	F4	3.46	0	0.007281
	FALSE	High	GDSETDLEALFNAVMNPK		5.10665e-05	0	1	1	4	P46937	0	1950.91	High	0	0.000901	4.67
		Checked	Confidence	Identifying Node	PSM Ambiguity	Annotated Sequence	Modifications	# Protein Groups	# Proteins	Master Protein Accessions	Protein Accessions	# Missed Cleavages	Charge	DeltaScore	DeltaCn	Rank	Search Engine Rank	m/z [Da]	MH+ [Da]	Theo. MH+ [Da]	DeltaM [ppm]	Deltam/z [Da]	Activation Type	MS Order	Isolation Interference [%]	Ion Inject Time [ms]	RT [min]	First Scan	Spectrum File	File ID	XCorr	Percolator q-Value	Percolator PEP
		FALSE	High	Sequest HT (A2)	Unambiguous	GDSETDLEALFNAVMNPK		1	1	P46937	P46937	0	3	0.79	0	1	1	650.975	1950.91	1950.91	0.17	0.00011	HCD (High Energy Collision Dissociation)	MS2	0	45	55.9819	61728	WQR_1_20190806.raw	F4	4.38	0	0.001014
		FALSE	High	Sequest HT (A2)	Unambiguous	GDSETDLEALFNAVMNPK		1	1	P46937	P46937	0	2	0.7646	0	1	1	975.96	1950.91	1950.91	0.99	0.00096	HCD (High Energy Collision Dissociation)	MS2	16.418	33.919	55.9782	61725	WQR_1_20190806.raw	F4	4.63	0	3.587e-05
		FALSE	High	Sequest HT (A2)	Unambiguous	GDSETDLEALFNAVMNPK		1	1	P46937	P46937	0	2	0.773	0	1	1	975.96	1950.91	1950.91	0.99	0.00096	HCD (High Energy Collision Dissociation)	MS2	11.8916	31.679	55.9732	61720	WQR_1_20190806.raw	F4	4.67	0	0.000901
		FALSE	High	Sequest HT (A2)	Unambiguous	GDSETDLEALFNAVMNPK		1	1	P46937	P46937	0	2	0.7863	0	1	1	975.962	1950.92	1950.91	2.86	0.00279	HCD (High Energy Collision Dissociation)	MS2	26.7801	45	55.9445	61692	WQR_1_20190806.raw	F4	4.54	0	0.0009893
	FALSE	High	GDSETDLEALFNAVMNPK	1xOxidation [M15]	6.92947e-05	0	1	1	6	P46937	0	1966.91	High	0	0.001001	4.93
		Checked	Confidence	Identifying Node	PSM Ambiguity	Annotated Sequence	Modifications	# Protein Groups	# Proteins	Master Protein Accessions	Protein Accessions	# Missed Cleavages	Charge	DeltaScore	DeltaCn	Rank	Search Engine Rank	m/z [Da]	MH+ [Da]	Theo. MH+ [Da]	DeltaM [ppm]	Deltam/z [Da]	Activation Type	MS Order	Isolation Interference [%]	Ion Inject Time [ms]	RT [min]	First Scan	Spectrum File	File ID	XCorr	Percolator q-Value	Percolator PEP
		FALSE	High	Sequest HT (A2)	Unambiguous	GDSETDLEALFNAVmNPK	M15(Oxidation)	1	1	P46937	P46937	0	3	0.7346	0	1	1	656.307	1966.91	1966.91	-0.35	-0.00023	HCD (High Energy Collision Dissociation)	MS2	55.6072	45	49.9029	55233	WQR_1_20190806.raw	F4	4.86	0	0.0006223
		FALSE	High	Sequest HT (A2)	Unambiguous	GDSETDLEALFNAVmNPK	M15(Oxidation)	1	1	P46937	P46937	0	2	0.6504	0	1	1	983.96	1966.91	1966.91	3.44	0.00338	HCD (High Energy Collision Dissociation)	MS2	16.2973	24.053	49.8525	55177	WQR_1_20190806.raw	F4	4.92	0	0.0005893
		FALSE	High	Sequest HT (A2)	Unambiguous	GDSETDLEALFNAVmNPK	M15(Oxidation)	1	1	P46937	P46937	0	2	0.6973	0	1	1	983.958	1966.91	1966.91	1.51	0.00149	HCD (High Energy Collision Dissociation)	MS2	0	45	49.7882	55101	WQR_1_20190806.raw	F4	4.79	0	4.94e-05
		FALSE	High	Sequest HT (A2)	Unambiguous	GDSETDLEALFNAVmNPK	M15(Oxidation)	1	1	P46937	P46937	0	2	0.7201	0	1	1	983.958	1966.91	1966.91	1.64	0.00161	HCD (High Energy Collision Dissociation)	MS2	22.2394	11.952	49.9757	55309	WQR_1_20190806.raw	F4	4.93	0	0.001001
		FALSE	High	Sequest HT (A2)	Unambiguous	GDSETDLEALFNAVmNPK	M15(Oxidation)	1	1	P46937	P46937	0	3	0.6495	0	1	1	656.308	1966.91	1966.91	1.88	0.00123	HCD (High Energy Collision Dissociation)	MS2	63.1606	7.429	50.4459	55802	WQR_1_20190806.raw	F4	3.11	0.001475	0.08856
		FALSE	High	Sequest HT (A2)	Unambiguous	GDSETDLEALFNAVmNPK	M15(Oxidation)	1	1	P46937	P46937	0	2	0.5144	0	1	1	983.96	1966.91	1966.91	2.82	0.00277	HCD (High Energy Collision Dissociation)	MS2	51.0824	45	50.4443	55800	WQR_1_20190806.raw	F4	2.08	0.00393	0.2177
	FALSE	High	TANVPQTVPMRLR		0.0435656	0.00152962	1	1	1	P46937	1	1482.82	High	0.0007925	0.04035	3.2
		Checked	Confidence	Identifying Node	PSM Ambiguity	Annotated Sequence	Modifications	# Protein Groups	# Proteins	Master Protein Accessions	Protein Accessions	# Missed Cleavages	Charge	DeltaScore	DeltaCn	Rank	Search Engine Rank	m/z [Da]	MH+ [Da]	Theo. MH+ [Da]	DeltaM [ppm]	Deltam/z [Da]	Activation Type	MS Order	Isolation Interference [%]	Ion Inject Time [ms]	RT [min]	First Scan	Spectrum File	File ID	XCorr	Percolator q-Value	Percolator PEP
		FALSE	High	Sequest HT (A2)	Unambiguous	TANVPQTVPMRLR		1	1	P46937	P46937	1	3	0.5562	0	1	1	494.945	1482.82	1482.82	-0.01	-1e-05	HCD (High Energy Collision Dissociation)	MS2	36.5143	45	21.0316	20617	WQR_1_20190806.raw	F4	3.2	0.0007925	0.04035
	FALSE	High	TANVPQTVPMR		0.0563937	0.00152962	1	1	1	P46937	0	1213.64	High	0.0007925	0.0528	2.82
		Checked	Confidence	Identifying Node	PSM Ambiguity	Annotated Sequence	Modifications	# Protein Groups	# Proteins	Master Protein Accessions	Protein Accessions	# Missed Cleavages	Charge	DeltaScore	DeltaCn	Rank	Search Engine Rank	m/z [Da]	MH+ [Da]	Theo. MH+ [Da]	DeltaM [ppm]	Deltam/z [Da]	Activation Type	MS Order	Isolation Interference [%]	Ion Inject Time [ms]	RT [min]	First Scan	Spectrum File	File ID	XCorr	Percolator q-Value	Percolator PEP
		FALSE	High	Sequest HT (A2)	Unambiguous	TANVPQTVPMR		1	1	P46937	P46937	0	2	0.695	0	1	1	607.322	1213.64	1213.64	0.72	0.00044	HCD (High Energy Collision Dissociation)	MS2	51.6582	12.977	16.8786	15688	WQR_1_20190806.raw	F4	2.82	0.0007925	0.0528
	FALSE	High	LQQLQMEKER	1xOxidation [M6]	0.0702051	0.00152962	1	1	1	P46937	1	1318.68	High	0.0007925	0.06636	2.64
		Checked	Confidence	Identifying Node	PSM Ambiguity	Annotated Sequence	Modifications	# Protein Groups	# Proteins	Master Protein Accessions	Protein Accessions	# Missed Cleavages	Charge	DeltaScore	DeltaCn	Rank	Search Engine Rank	m/z [Da]	MH+ [Da]	Theo. MH+ [Da]	DeltaM [ppm]	Deltam/z [Da]	Activation Type	MS Order	Isolation Interference [%]	Ion Inject Time [ms]	RT [min]	First Scan	Spectrum File	File ID	XCorr	Percolator q-Value	Percolator PEP
		FALSE	High	Sequest HT (A2)	Unambiguous	LQQLQmEKER	M6(Oxidation)	1	1	P46937	P46937	1	3	0.5038	0	1	1	440.232	1318.68	1318.68	1.36	0.0006	HCD (High Energy Collision Dissociation)	MS2	2.27195	19.662	8.8514	6389	WQR_1_20190806.raw	F4	2.64	0.0007925	0.06636
	FALSE	High	LQQLQMEK		0.126092	0.00267473	1	1	1	P46937	0	1017.54	High	0.002119	0.1212	2.55
		Checked	Confidence	Identifying Node	PSM Ambiguity	Annotated Sequence	Modifications	# Protein Groups	# Proteins	Master Protein Accessions	Protein Accessions	# Missed Cleavages	Charge	DeltaScore	DeltaCn	Rank	Search Engine Rank	m/z [Da]	MH+ [Da]	Theo. MH+ [Da]	DeltaM [ppm]	Deltam/z [Da]	Activation Type	MS Order	Isolation Interference [%]	Ion Inject Time [ms]	RT [min]	First Scan	Spectrum File	File ID	XCorr	Percolator q-Value	Percolator PEP
		FALSE	High	Sequest HT (A2)	Unambiguous	LQQLQMEK		1	1	P46937	P46937	0	2	0.3412	0	1	1	509.274	1017.54	1017.54	1.36	0.00069	HCD (High Energy Collision Dissociation)	MS2	19.8365	3.075	15.1475	13733	WQR_1_20190806.raw	F4	2.55	0.002119	0.1212
	FALSE	High	KLPDSFFKPPEPKSHSR		0.0858335	0.00267473	1	1	1	P46937	2	1997.06	High	0.001475	0.08143	2.54
		Checked	Confidence	Identifying Node	PSM Ambiguity	Annotated Sequence	Modifications	# Protein Groups	# Proteins	Master Protein Accessions	Protein Accessions	# Missed Cleavages	Charge	DeltaScore	DeltaCn	Rank	Search Engine Rank	m/z [Da]	MH+ [Da]	Theo. MH+ [Da]	DeltaM [ppm]	Deltam/z [Da]	Activation Type	MS Order	Isolation Interference [%]	Ion Inject Time [ms]	RT [min]	First Scan	Spectrum File	File ID	XCorr	Percolator q-Value	Percolator PEP
		FALSE	High	Sequest HT (A2)	Unambiguous	KLPDSFFKPPEPKSHSR		1	1	P46937	P46937	2	4	0.5551	0	1	1	500.02	1997.06	1997.06	-1.4	-0.0007	HCD (High Energy Collision Dissociation)	MS2	15.6182	45	18.7683	17891	WQR_1_20190806.raw	F4	2.54	0.001475	0.08143
	FALSE	High	ISQSAPVK		0.139902	0.00267473	1	1	2	P46937	0	829.478	High	0.002119	0.1349	2.41
		Checked	Confidence	Identifying Node	PSM Ambiguity	Annotated Sequence	Modifications	# Protein Groups	# Proteins	Master Protein Accessions	Protein Accessions	# Missed Cleavages	Charge	DeltaScore	DeltaCn	Rank	Search Engine Rank	m/z [Da]	MH+ [Da]	Theo. MH+ [Da]	DeltaM [ppm]	Deltam/z [Da]	Activation Type	MS Order	Isolation Interference [%]	Ion Inject Time [ms]	RT [min]	First Scan	Spectrum File	File ID	XCorr	Percolator q-Value	Percolator PEP
		FALSE	High	Sequest HT (A2)	Unambiguous	ISQSAPVK		1	1	P46937	P46937	0	2	0.3734	0	1	1	415.243	829.479	829.478	1.07	0.00045	HCD (High Energy Collision Dissociation)	MS2	30.0069	5.88	8.3802	5821	WQR_1_20190806.raw	F4	2.41	0.002119	0.1349
		FALSE	High	Sequest HT (A2)	Unambiguous	ISQSAPVK		1	1	P46937	P46937	0	2	0.2222	0	1	1	415.243	829.478	829.478	0.04	2e-05	HCD (High Energy Collision Dissociation)	MS2	13.5183	34.46	7.9411	5294	WQR_1_20190806.raw	F4	1.98	0.00453	0.2358
	FALSE	High	TTSWIDPR		0.199318	0.00497177	1	4	2	P46937	0	975.489	High	0.003364	0.1946	1.82
		Checked	Confidence	Identifying Node	PSM Ambiguity	Annotated Sequence	Modifications	# Protein Groups	# Proteins	Master Protein Accessions	Protein Accessions	# Missed Cleavages	Charge	DeltaScore	DeltaCn	Rank	Search Engine Rank	m/z [Da]	MH+ [Da]	Theo. MH+ [Da]	DeltaM [ppm]	Deltam/z [Da]	Activation Type	MS Order	Isolation Interference [%]	Ion Inject Time [ms]	RT [min]	First Scan	Spectrum File	File ID	XCorr	Percolator q-Value	Percolator PEP
		FALSE	High	Sequest HT (A2)	Unambiguous	TTSWIDPR		1	1		Q8IX03	0	2	0	0	1	1	488.249	975.491	975.489	1.45	0.00071	HCD (High Energy Collision Dissociation)	MS2	73.4023	15.01	23.0745	23099	WQR_1_20190806.raw	F4	1.82	0.003364	0.1946
		FALSE	High	Sequest HT (A2)	Unambiguous	TTSWLDPR		1	3	P46937	P46937; Q96QZ7; Q86UL8	0	2		0	1	2	488.249	975.491	975.489	1.45	0.00071	HCD (High Energy Collision Dissociation)	MS2	73.4023	15.01	23.0745	23099	WQR_1_20190806.raw	F4	1.82	0.003364	0.1946
	FALSE	High	LQQLQMEK	1xOxidation [M6]	0.185867	0.00497177	1	1	1	P46937	0	1033.53	High	0.003364	0.1809	2.39
		Checked	Confidence	Identifying Node	PSM Ambiguity	Annotated Sequence	Modifications	# Protein Groups	# Proteins	Master Protein Accessions	Protein Accessions	# Missed Cleavages	Charge	DeltaScore	DeltaCn	Rank	Search Engine Rank	m/z [Da]	MH+ [Da]	Theo. MH+ [Da]	DeltaM [ppm]	Deltam/z [Da]	Activation Type	MS Order	Isolation Interference [%]	Ion Inject Time [ms]	RT [min]	First Scan	Spectrum File	File ID	XCorr	Percolator q-Value	Percolator PEP
		FALSE	High	Sequest HT (A2)	Unambiguous	LQQLQmEK	M6(Oxidation)	1	1	P46937	P46937	0	2	0.5188	0	1	1	517.272	1033.54	1033.53	1.83	0.00094	HCD (High Energy Collision Dissociation)	MS2	37.9787	7.384	9.7575	7459	WQR_1_20190806.raw	F4	2.39	0.003364	0.1809
	FALSE	High	LKQQELLR		0.238488	0.00596215	1	1	1	P46937	1	1027.63	High	0.00453	0.2336	2.24
		Checked	Confidence	Identifying Node	PSM Ambiguity	Annotated Sequence	Modifications	# Protein Groups	# Proteins	Master Protein Accessions	Protein Accessions	# Missed Cleavages	Charge	DeltaScore	DeltaCn	Rank	Search Engine Rank	m/z [Da]	MH+ [Da]	Theo. MH+ [Da]	DeltaM [ppm]	Deltam/z [Da]	Activation Type	MS Order	Isolation Interference [%]	Ion Inject Time [ms]	RT [min]	First Scan	Spectrum File	File ID	XCorr	Percolator q-Value	Percolator PEP
		FALSE	High	Sequest HT (A2)	Unambiguous	LKQQELLR		1	1	P46937	P46937	1	2	0.2812	0	1	1	514.317	1027.63	1027.63	1.12	0.00057	HCD (High Energy Collision Dissociation)	MS2	15.2703	2.391	12.4479	10579	WQR_1_20190806.raw	F4	2.24	0.00453	0.2336
FALSE	High	Master Protein	P0DMV9	Heat shock 70 kDa protein 1B OS=Homo sapiens OX=9606 GN=HSPA1B PE=1 SV=1	0	143.39	59	34	135	20	1	641	70	5.66	574.37	34
	Checked	Confidence	Sequence	Modifications	Qvality PEP	Qvality q-value	# Protein Groups	# Proteins	# PSMs	Master Protein Accessions	# Missed Cleavages	Theo. MH+ [Da]	Confidence (by Search Engine): Sequest HT	Percolator q-Value (by Search Engine): Sequest HT	Percolator PEP (by Search Engine): Sequest HT	XCorr (by Search Engine): Sequest HT
	FALSE	High	TTPSYVAFTDTER		0.00386804	0	4	6	2	P17066; P11142; P0DMV9; P34931	0	1487.7	High	0	0.00746	3.18
		Checked	Confidence	Identifying Node	PSM Ambiguity	Annotated Sequence	Modifications	# Protein Groups	# Proteins	Master Protein Accessions	Protein Accessions	# Missed Cleavages	Charge	DeltaScore	DeltaCn	Rank	Search Engine Rank	m/z [Da]	MH+ [Da]	Theo. MH+ [Da]	DeltaM [ppm]	Deltam/z [Da]	Activation Type	MS Order	Isolation Interference [%]	Ion Inject Time [ms]	RT [min]	First Scan	Spectrum File	File ID	XCorr	Percolator q-Value	Percolator PEP
		FALSE	High	Sequest HT (A2)	Unambiguous	TTPSYVAFTDTER		4	6	P17066; P11142; P0DMV9; P34931	P48741; P17066; P54652; P11142; P0DMV9; P34931	0	3	0.6447	0	1	1	496.572	1487.7	1487.7	-0.26	-0.00013	HCD (High Energy Collision Dissociation)	MS2	59.7366	45	25.5014	26041	WQR_1_20190806.raw	F4	3.18	0	0.00746
		FALSE	High	Sequest HT (A2)	Unambiguous	TTPSYVAFTDTER		4	6	P17066; P11142; P0DMV9; P34931	P48741; P17066; P54652; P11142; P0DMV9; P34931	0	2	0.5845	0	1	1	744.355	1487.7	1487.7	0.87	0.00065	HCD (High Energy Collision Dissociation)	MS2	17.1152	6.115	25.4211	25944	WQR_1_20190806.raw	F4	2.84	0	0.003252
	FALSE	High	MKEIAEAYLGYPVTNAVITVPAYFNDSQR	1xOxidation [M1]	0.000172405	0	1	1	2	P0DMV9	1	3276.62	High	0	0.0001274	5.16
		Checked	Confidence	Identifying Node	PSM Ambiguity	Annotated Sequence	Modifications	# Protein Groups	# Proteins	Master Protein Accessions	Protein Accessions	# Missed Cleavages	Charge	DeltaScore	DeltaCn	Rank	Search Engine Rank	m/z [Da]	MH+ [Da]	Theo. MH+ [Da]	DeltaM [ppm]	Deltam/z [Da]	Activation Type	MS Order	Isolation Interference [%]	Ion Inject Time [ms]	RT [min]	First Scan	Spectrum File	File ID	XCorr	Percolator q-Value	Percolator PEP
		FALSE	High	Sequest HT (A2)	Unambiguous	mKEIAEAYLGYPVTNAVITVPAYFNDSQR	M1(Oxidation)	1	1	P0DMV9	P0DMV9	1	3	0.5328	0	1	1	1092.88	3276.63	3276.62	2.18	0.00238	HCD (High Energy Collision Dissociation)	MS2	19.4937	19.958	47.4623	52445	WQR_1_20190806.raw	F4	4.11	0	0.004703
		FALSE	High	Sequest HT (A2)	Unambiguous	mKEIAEAYLGYPVTNAVITVPAYFNDSQR	M1(Oxidation)	1	1	P0DMV9	P0DMV9	1	3	0.6899	0	1	1	1092.88	3276.63	3276.62	2.52	0.00275	HCD (High Energy Collision Dissociation)	MS2	0	45	47.4171	52396	WQR_1_20190806.raw	F4	5.16	0	0.0001274
	FALSE	High	MKEIAEAYLGYPVTNAVITVPAYFNDSQR		2.83279e-05	0	1	1	5	P0DMV9	1	3260.63	High	0	1.948e-05	6.65
		Checked	Confidence	Identifying Node	PSM Ambiguity	Annotated Sequence	Modifications	# Protein Groups	# Proteins	Master Protein Accessions	Protein Accessions	# Missed Cleavages	Charge	DeltaScore	DeltaCn	Rank	Search Engine Rank	m/z [Da]	MH+ [Da]	Theo. MH+ [Da]	DeltaM [ppm]	Deltam/z [Da]	Activation Type	MS Order	Isolation Interference [%]	Ion Inject Time [ms]	RT [min]	First Scan	Spectrum File	File ID	XCorr	Percolator q-Value	Percolator PEP
		FALSE	High	Sequest HT (A2)	Unambiguous	MKEIAEAYLGYPVTNAVITVPAYFNDSQR		1	1	P0DMV9	P0DMV9	1	3	0.6163	0	1	1	1087.55	3260.64	3260.63	2.17	0.00236	HCD (High Energy Collision Dissociation)	MS2	0	45	48.6226	53772	WQR_1_20190806.raw	F4	5.63	0	0.001065
		FALSE	High	Sequest HT (A2)	Unambiguous	MKEIAEAYLGYPVTNAVITVPAYFNDSQR		1	1	P0DMV9	P0DMV9	1	3	0.5982	0	1	1	1087.55	3260.64	3260.63	2.17	0.00236	HCD (High Energy Collision Dissociation)	MS2	0	45	48.617	53766	WQR_1_20190806.raw	F4	5.7	0	0.0009719
		FALSE	High	Sequest HT (A2)	Unambiguous	MKEIAEAYLGYPVTNAVITVPAYFNDSQR		1	1	P0DMV9	P0DMV9	1	3	0.7173	0	1	1	1087.55	3260.63	3260.63	0.82	0.00089	HCD (High Energy Collision Dissociation)	MS2	0	45	48.6107	53760	WQR_1_20190806.raw	F4	6.65	0	1.948e-05
		FALSE	High	Sequest HT (A2)	Unambiguous	MKEIAEAYLGYPVTNAVITVPAYFNDSQR		1	1	P0DMV9	P0DMV9	1	3	0.6375	0	1	1	1087.55	3260.63	3260.63	0.82	0.00089	HCD (High Energy Collision Dissociation)	MS2	0	45	48.6087	53758	WQR_1_20190806.raw	F4	6.29	0	8.539e-05
		FALSE	High	Sequest HT (A2)	Unambiguous	MKEIAEAYLGYPVTNAVITVPAYFNDSQR		1	1	P0DMV9	P0DMV9	1	3	0.6256	0	1	1	1087.55	3260.63	3260.63	0.82	0.00089	HCD (High Energy Collision Dissociation)	MS2	0	45	48.6069	53756	WQR_1_20190806.raw	F4	5.77	0	0.000328
	FALSE	High	LVNHFVEEFKR		0.010901	0	1	1	1	P0DMV9	1	1417.76	High	0	0.009567	3.81
		Checked	Confidence	Identifying Node	PSM Ambiguity	Annotated Sequence	Modifications	# Protein Groups	# Proteins	Master Protein Accessions	Protein Accessions	# Missed Cleavages	Charge	DeltaScore	DeltaCn	Rank	Search Engine Rank	m/z [Da]	MH+ [Da]	Theo. MH+ [Da]	DeltaM [ppm]	Deltam/z [Da]	Activation Type	MS Order	Isolation Interference [%]	Ion Inject Time [ms]	RT [min]	First Scan	Spectrum File	File ID	XCorr	Percolator q-Value	Percolator PEP
		FALSE	High	Sequest HT (A2)	Unambiguous	LVNHFVEEFKR		1	1	P0DMV9	P0DMV9	1	3	0.664	0	1	1	473.259	1417.76	1417.76	3.45	0.00163	HCD (High Energy Collision Dissociation)	MS2	54.5934	3.519	20.913	20463	WQR_1_20190806.raw	F4	3.81	0	0.009567
	FALSE	High	LVNHFVEEFK		0.0260006	0	1	1	2	P0DMV9	0	1261.66	High	0	0.02371	3.8
		Checked	Confidence	Identifying Node	PSM Ambiguity	Annotated Sequence	Modifications	# Protein Groups	# Proteins	Master Protein Accessions	Protein Accessions	# Missed Cleavages	Charge	DeltaScore	DeltaCn	Rank	Search Engine Rank	m/z [Da]	MH+ [Da]	Theo. MH+ [Da]	DeltaM [ppm]	Deltam/z [Da]	Activation Type	MS Order	Isolation Interference [%]	Ion Inject Time [ms]	RT [min]	First Scan	Spectrum File	File ID	XCorr	Percolator q-Value	Percolator PEP
		FALSE	High	Sequest HT (A2)	Unambiguous	LVNHFVEEFK		1	1	P0DMV9	P0DMV9	0	3	0.5921	0	1	1	421.224	1261.66	1261.66	-0.59	-0.00025	HCD (High Energy Collision Dissociation)	MS2	17.0427	12.178	23.9659	24205	WQR_1_20190806.raw	F4	3.8	0	0.02371
		FALSE	High	Sequest HT (A2)	Unambiguous	LVNHFVEEFK		1	1	P0DMV9	P0DMV9	0	2	0.5804	0	1	1	631.333	1261.66	1261.66	0.27	0.00017	HCD (High Energy Collision Dissociation)	MS2	0	39.685	24.1613	24444	WQR_1_20190806.raw	F4	3.36	0.001475	0.1017
	FALSE	High	LDKAQIHDLVLVGGSTR		0.000151815	0	1	1	10	P0DMV9	1	1822.02	High	0	0.0002422	6.26
		Checked	Confidence	Identifying Node	PSM Ambiguity	Annotated Sequence	Modifications	# Protein Groups	# Proteins	Master Protein Accessions	Protein Accessions	# Missed Cleavages	Charge	DeltaScore	DeltaCn	Rank	Search Engine Rank	m/z [Da]	MH+ [Da]	Theo. MH+ [Da]	DeltaM [ppm]	Deltam/z [Da]	Activation Type	MS Order	Isolation Interference [%]	Ion Inject Time [ms]	RT [min]	First Scan	Spectrum File	File ID	XCorr	Percolator q-Value	Percolator PEP
		FALSE	High	Sequest HT (A2)	Unambiguous	LDKAQIHDLVLVGGSTR		1	1	P0DMV9	P0DMV9	1	3	0.6709	0	1	1	608.011	1822.02	1822.02	0.36	0.00022	HCD (High Energy Collision Dissociation)	MS2	38.6616	45	26.3493	27078	WQR_1_20190806.raw	F4	6.26	0	0.0002422
		FALSE	High	Sequest HT (A2)	Unambiguous	LDKAQIHDLVLVGGSTR		1	1	P0DMV9	P0DMV9	1	3	0.7808	0	1	1	608.011	1822.02	1822.02	0.56	0.00034	HCD (High Energy Collision Dissociation)	MS2	17.207	18.387	26.3748	27109	WQR_1_20190806.raw	F4	6.25	0	0.0001117
		FALSE	High	Sequest HT (A2)	Unambiguous	LDKAQIHDLVLVGGSTR		1	1	P0DMV9	P0DMV9	1	2	0.762	0	1	1	911.514	1822.02	1822.02	1.6	0.00146	HCD (High Energy Collision Dissociation)	MS2	0	45	26.4424	27191	WQR_1_20190806.raw	F4	5.42	0	0.002298
		FALSE	High	Sequest HT (A2)	Unambiguous	LDKAQIHDLVLVGGSTR		1	1	P0DMV9	P0DMV9	1	2	0.7491	0	1	1	911.514	1822.02	1822.02	1.6	0.00146	HCD (High Energy Collision Dissociation)	MS2	0	45	26.447	27196	WQR_1_20190806.raw	F4	5.42	0	0.002938
		FALSE	High	Sequest HT (A2)	Unambiguous	LDKAQIHDLVLVGGSTR		1	1	P0DMV9	P0DMV9	1	3	0.6994	0	1	1	608.011	1822.02	1822.02	0.76	0.00046	HCD (High Energy Collision Dissociation)	MS2	5.02134	1.493	26.501	27256	WQR_1_20190806.raw	F4	4.69	0	0.00206
		FALSE	High	Sequest HT (A2)	Unambiguous	LDKAQIHDLVLVGGSTR		1	1	P0DMV9	P0DMV9	1	3	0.6952	0	1	1	608.011	1822.02	1822.02	0.76	0.00046	HCD (High Energy Collision Dissociation)	MS2	2.66754	2.4	26.504	27261	WQR_1_20190806.raw	F4	4.56	0	0.01935
		FALSE	High	Sequest HT (A2)	Unambiguous	LDKAQIHDLVLVGGSTR		1	1	P0DMV9	P0DMV9	1	4	0.595	0	1	1	456.261	1822.02	1822.02	1.52	0.00069	HCD (High Energy Collision Dissociation)	MS2	0	5.454	26.4062	27146	WQR_1_20190806.raw	F4	3.58	0.001475	0.1107
		FALSE	High	Sequest HT (A2)	Unambiguous	LDKAQIHDLVLVGGSTR		1	1	P0DMV9	P0DMV9	1	4	0.651	0	1	1	456.261	1822.02	1822.02	1.52	0.00069	HCD (High Energy Collision Dissociation)	MS2	59.3802	1.965	26.4074	27148	WQR_1_20190806.raw	F4	2.98	0.002119	0.1215
		FALSE	High	Sequest HT (A2)	Unambiguous	LDKAQIHDLVLVGGSTR		1	1	P0DMV9	P0DMV9	1	4	0.6077	0	1	1	456.261	1822.02	1822.02	1.52	0.00069	HCD (High Energy Collision Dissociation)	MS2	68.8791	1.602	26.4102	27152	WQR_1_20190806.raw	F4	3.11	0.002119	0.1354
		FALSE	High	Sequest HT (A2)	Unambiguous	LDKAQIHDLVLVGGSTR		1	1	P0DMV9	P0DMV9	1	4	0.609	0	1	1	456.261	1822.02	1822.02	1.52	0.00069	HCD (High Energy Collision Dissociation)	MS2	59.3802	2.004	26.4079	27149	WQR_1_20190806.raw	F4	3.35	0.002731	0.1473
	FALSE	High	IINEPTAAAIAYGLDR		0.000480964	0	2	2	10	P17066; P0DMV9	0	1687.9	High	0	0.002571	4.77
		Checked	Confidence	Identifying Node	PSM Ambiguity	Annotated Sequence	Modifications	# Protein Groups	# Proteins	Master Protein Accessions	Protein Accessions	# Missed Cleavages	Charge	DeltaScore	DeltaCn	Rank	Search Engine Rank	m/z [Da]	MH+ [Da]	Theo. MH+ [Da]	DeltaM [ppm]	Deltam/z [Da]	Activation Type	MS Order	Isolation Interference [%]	Ion Inject Time [ms]	RT [min]	First Scan	Spectrum File	File ID	XCorr	Percolator q-Value	Percolator PEP
		FALSE	High	Sequest HT (A2)	Unambiguous	IINEPTAAAIAYGLDR		2	2	P17066; P0DMV9	P17066; P0DMV9	0	3	0.6918	0	1	1	563.306	1687.9	1687.9	0.42	0.00024	HCD (High Energy Collision Dissociation)	MS2	6.09671	1.587	36.7129	39846	WQR_1_20190806.raw	F4	4.77	0	0.002571
		FALSE	High	Sequest HT (A2)	Unambiguous	IINEPTAAAIAYGLDR		2	2	P17066; P0DMV9	P17066; P0DMV9	0	2	0.6545	0	1	1	844.455	1687.9	1687.9	0.97	0.00082	HCD (High Energy Collision Dissociation)	MS2	0	5.119	36.6524	39770	WQR_1_20190806.raw	F4	3.85	0	0.004274
		FALSE	High	Sequest HT (A2)	Unambiguous	IINEPTAAAIAYGLDR		2	2	P17066; P0DMV9	P17066; P0DMV9	0	2	0.6919	0	1	1	844.455	1687.9	1687.9	0.97	0.00082	HCD (High Energy Collision Dissociation)	MS2	0	1.949	36.6512	39768	WQR_1_20190806.raw	F4	4.09	0	0.002154
		FALSE	High	Sequest HT (A2)	Unambiguous	IINEPTAAAIAYGLDR		2	2	P17066; P0DMV9	P17066; P0DMV9	0	2	0.6925	0	1	1	844.455	1687.9	1687.9	0.97	0.00082	HCD (High Energy Collision Dissociation)	MS2	3.6754	1.448	36.6506	39767	WQR_1_20190806.raw	F4	4.52	0	0.00117
		FALSE	High	Sequest HT (A2)	Unambiguous	IINEPTAAAIAYGLDR		2	2	P17066; P0DMV9	P17066; P0DMV9	0	2	0.7074	0	1	1	844.454	1687.9	1687.9	-0.91	-0.00077	HCD (High Energy Collision Dissociation)	MS2	5.85008	3.086	36.6269	39735	WQR_1_20190806.raw	F4	4.58	0	0.001089
		FALSE	High	Sequest HT (A2)	Unambiguous	IINEPTAAAIAYGLDR		2	2	P17066; P0DMV9	P17066; P0DMV9	0	3	0.7589	0	1	1	563.305	1687.9	1687.9	-0.23	-0.00013	HCD (High Energy Collision Dissociation)	MS2	79.4684	2.23	36.6384	39751	WQR_1_20190806.raw	F4	4.77	0	0.000643
		FALSE	High	Sequest HT (A2)	Unambiguous	IINEPTAAAIAYGLDR		2	2	P17066; P0DMV9	P17066; P0DMV9	0	2	0.6241	0	1	1	844.455	1687.9	1687.9	1.19	0.001	HCD (High Energy Collision Dissociation)	MS2	24.8709	45	34.1224	36668	WQR_1_20190806.raw	F4	3.99	0	0.000372
		FALSE	High	Sequest HT (A2)	Unambiguous	IINEPTAAAIAYGLDR		2	2	P17066; P0DMV9	P17066; P0DMV9	0	2	0.6022	0	1	1	844.456	1687.9	1687.9	1.48	0.00125	HCD (High Energy Collision Dissociation)	MS2	47.3257	45	34.1491	36703	WQR_1_20190806.raw	F4	3.72	0.0007925	0.03374
		FALSE	High	Sequest HT (A2)	Unambiguous	IINEPTAAAIAYGLDR		2	2	P17066; P0DMV9	P17066; P0DMV9	0	2	0.654	0	1	1	844.455	1687.9	1687.9	1.33	0.00113	HCD (High Energy Collision Dissociation)	MS2	0	2.948	36.7782	39924	WQR_1_20190806.raw	F4	3.41	0.0007925	0.04079
		FALSE	High	Sequest HT (A2)	Unambiguous	IINEPTAAAIAYGLDR		2	2	P17066; P0DMV9	P17066; P0DMV9	0	3	0.5916	0	1	1	563.306	1687.9	1687.9	0.75	0.00042	HCD (High Energy Collision Dissociation)	MS2	22.7298	3.272	36.7495	39890	WQR_1_20190806.raw	F4	3.11	0.0007925	0.04745
	FALSE	High	RKELEQVCNPIISGLYQGAGGPGPGGFGAQGPK	1xCarbamidomethyl [C8]	2.64852e-06	0	1	1	3	P0DMV9	2	3339.69	High	0	1.652e-06	6.57
		Checked	Confidence	Identifying Node	PSM Ambiguity	Annotated Sequence	Modifications	# Protein Groups	# Proteins	Master Protein Accessions	Protein Accessions	# Missed Cleavages	Charge	DeltaScore	DeltaCn	Rank	Search Engine Rank	m/z [Da]	MH+ [Da]	Theo. MH+ [Da]	DeltaM [ppm]	Deltam/z [Da]	Activation Type	MS Order	Isolation Interference [%]	Ion Inject Time [ms]	RT [min]	First Scan	Spectrum File	File ID	XCorr	Percolator q-Value	Percolator PEP
		FALSE	High	Sequest HT (A2)	Unambiguous	RKELEQVcNPIISGLYQGAGGPGPGGFGAQGPK	C8(Carbamidomethyl)	1	1	P0DMV9	P0DMV9	2	4	0.6403	0	1	1	835.682	3339.71	3339.69	5.21	0.00435	HCD (High Energy Collision Dissociation)	MS2	11.7057	45	35.9003	38836	WQR_1_20190806.raw	F4	4.81	0	0.0005743
		FALSE	High	Sequest HT (A2)	Unambiguous	RKELEQVcNPIISGLYQGAGGPGPGGFGAQGPK	C8(Carbamidomethyl)	1	1	P0DMV9	P0DMV9	2	4	0.6672	0	1	1	835.676	3339.68	3339.69	-2.03	-0.00169	HCD (High Energy Collision Dissociation)	MS2	0	45	35.9544	38894	WQR_1_20190806.raw	F4	5.77	0	8.075e-06
		FALSE	High	Sequest HT (A2)	Unambiguous	RKELEQVcNPIISGLYQGAGGPGPGGFGAQGPK	C8(Carbamidomethyl)	1	1	P0DMV9	P0DMV9	2	4	0.6865	0	1	1	835.676	3339.68	3339.69	-2.03	-0.00169	HCD (High Energy Collision Dissociation)	MS2	11.5019	43.62	35.963	38904	WQR_1_20190806.raw	F4	6.57	0	1.652e-06
	FALSE	High	QTQIFTTYSDNQPGVLIQVYEGER		0.00313013	0	2	2	3	P0DMV9; P34931	0	2786.36	High	0	0.00277	5.35
		Checked	Confidence	Identifying Node	PSM Ambiguity	Annotated Sequence	Modifications	# Protein Groups	# Proteins	Master Protein Accessions	Protein Accessions	# Missed Cleavages	Charge	DeltaScore	DeltaCn	Rank	Search Engine Rank	m/z [Da]	MH+ [Da]	Theo. MH+ [Da]	DeltaM [ppm]	Deltam/z [Da]	Activation Type	MS Order	Isolation Interference [%]	Ion Inject Time [ms]	RT [min]	First Scan	Spectrum File	File ID	XCorr	Percolator q-Value	Percolator PEP
		FALSE	High	Sequest HT (A2)	Unambiguous	QTQIFTTYSDNQPGVLIQVYEGER		2	2	P0DMV9; P34931	P0DMV9; P34931	0	3	0.7417	0	1	1	929.462	2786.37	2786.36	2.62	0.00243	HCD (High Energy Collision Dissociation)	MS2	0	13.011	44.0681	48510	WQR_1_20190806.raw	F4	5.15	0	0.002608
		FALSE	High	Sequest HT (A2)	Unambiguous	QTQIFTTYSDNQPGVLIQVYEGER		2	2	P0DMV9; P34931	P0DMV9; P34931	0	3	0.7701	0	1	1	929.462	2786.37	2786.36	2.62	0.00243	HCD (High Energy Collision Dissociation)	MS2	0	45	44.0598	48496	WQR_1_20190806.raw	F4	5.35	0	0.00277
		FALSE	High	Sequest HT (A2)	Unambiguous	QTQIFTTYSDNQPGVLIQVYEGER		2	2	P0DMV9; P34931	P0DMV9; P34931	0	3	0.6656	0	1	1	929.46	2786.37	2786.36	0.97	0.00091	HCD (High Energy Collision Dissociation)	MS2	53.4297	6.094	44.3145	48799	WQR_1_20190806.raw	F4	3.11	0.0007925	0.03858
	FALSE	High	SINPDEAVAYGAAVQAAILMGDK	1xOxidation [M20]	0.000411139	0	2	2	2	P0DMV9; P34931	0	2320.15	High	0	0.0004373	5.21
		Checked	Confidence	Identifying Node	PSM Ambiguity	Annotated Sequence	Modifications	# Protein Groups	# Proteins	Master Protein Accessions	Protein Accessions	# Missed Cleavages	Charge	DeltaScore	DeltaCn	Rank	Search Engine Rank	m/z [Da]	MH+ [Da]	Theo. MH+ [Da]	DeltaM [ppm]	Deltam/z [Da]	Activation Type	MS Order	Isolation Interference [%]	Ion Inject Time [ms]	RT [min]	First Scan	Spectrum File	File ID	XCorr	Percolator q-Value	Percolator PEP
		FALSE	High	Sequest HT (A2)	Unambiguous	SINPDEAVAYGAAVQAAILmGDK	M20(Oxidation)	2	2	P0DMV9; P34931	P0DMV9; P34931	0	2	0.81	0	1	1	1160.58	2320.15	2320.15	1.8	0.00209	HCD (High Energy Collision Dissociation)	MS2	0	45	51.1495	56541	WQR_1_20190806.raw	F4	5.21	0	0.0004373
		FALSE	High	Sequest HT (A2)	Unambiguous	SINPDEAVAYGAAVQAAILmGDK	M20(Oxidation)	2	2	P0DMV9; P34931	P0DMV9; P34931	0	2	0.7615	0	1	1	1160.58	2320.16	2320.15	3.59	0.00417	HCD (High Energy Collision Dissociation)	MS2	0	45	51.1151	56506	WQR_1_20190806.raw	F4	4.78	0	0.0003152
	FALSE	High	SINPDEAVAYGAAVQAAILMGDK		0.00878762	0	2	2	1	P0DMV9; P34931	0	2304.15	High	0	0.00766	4.4
		Checked	Confidence	Identifying Node	PSM Ambiguity	Annotated Sequence	Modifications	# Protein Groups	# Proteins	Master Protein Accessions	Protein Accessions	# Missed Cleavages	Charge	DeltaScore	DeltaCn	Rank	Search Engine Rank	m/z [Da]	MH+ [Da]	Theo. MH+ [Da]	DeltaM [ppm]	Deltam/z [Da]	Activation Type	MS Order	Isolation Interference [%]	Ion Inject Time [ms]	RT [min]	First Scan	Spectrum File	File ID	XCorr	Percolator q-Value	Percolator PEP
		FALSE	High	Sequest HT (A2)	Unambiguous	SINPDEAVAYGAAVQAAILMGDK		2	2	P0DMV9; P34931	P0DMV9; P34931	0	3	0.6909	0	1	1	768.724	2304.16	2304.15	1.01	0.00077	HCD (High Energy Collision Dissociation)	MS2	35.0211	16.45	53.067	58664	WQR_1_20190806.raw	F4	4.4	0	0.00766
	FALSE	High	NALESYAFNMK	1xOxidation [M10]	0.0216909	0	2	2	1	P0DMV9; P34931	0	1303.6	High	0	0.01959	3.17
		Checked	Confidence	Identifying Node	PSM Ambiguity	Annotated Sequence	Modifications	# Protein Groups	# Proteins	Master Protein Accessions	Protein Accessions	# Missed Cleavages	Charge	DeltaScore	DeltaCn	Rank	Search Engine Rank	m/z [Da]	MH+ [Da]	Theo. MH+ [Da]	DeltaM [ppm]	Deltam/z [Da]	Activation Type	MS Order	Isolation Interference [%]	Ion Inject Time [ms]	RT [min]	First Scan	Spectrum File	File ID	XCorr	Percolator q-Value	Percolator PEP
		FALSE	High	Sequest HT (A2)	Unambiguous	NALESYAFNmK	M10(Oxidation)	2	2	P0DMV9; P34931	P0DMV9; P34931	0	2	0.653	0	1	1	652.303	1303.6	1303.6	-0.21	-0.00014	HCD (High Energy Collision Dissociation)	MS2	45.9532	13.364	24.6516	25020	WQR_1_20190806.raw	F4	3.17	0	0.01959
	FALSE	High	NALESYAFNMK		0.0126912	0	2	2	2	P0DMV9; P34931	0	1287.6	High	0	0.01124	3.5
		Checked	Confidence	Identifying Node	PSM Ambiguity	Annotated Sequence	Modifications	# Protein Groups	# Proteins	Master Protein Accessions	Protein Accessions	# Missed Cleavages	Charge	DeltaScore	DeltaCn	Rank	Search Engine Rank	m/z [Da]	MH+ [Da]	Theo. MH+ [Da]	DeltaM [ppm]	Deltam/z [Da]	Activation Type	MS Order	Isolation Interference [%]	Ion Inject Time [ms]	RT [min]	First Scan	Spectrum File	File ID	XCorr	Percolator q-Value	Percolator PEP
		FALSE	High	Sequest HT (A2)	Unambiguous	NALESYAFNMK		2	2	P0DMV9; P34931	P0DMV9; P34931	0	2	0.68	0	1	1	644.306	1287.6	1287.6	0.58	0.00037	HCD (High Energy Collision Dissociation)	MS2	0	5.583	31.4882	33413	WQR_1_20190806.raw	F4	3.5	0	0.01124
		FALSE	High	Sequest HT (A2)	Unambiguous	NALESYAFNMK		2	2	P0DMV9; P34931	P0DMV9; P34931	0	2	0.4208	0	1	1	644.308	1287.61	1287.6	3.23	0.00208	HCD (High Energy Collision Dissociation)	MS2		45	31.7447	33727	WQR_1_20190806.raw	F4	2.59	0.0007925	0.02703
	FALSE	High	NQVALNPQNTVFDAK		0.000530224	0	1	1	4	P0DMV9	0	1658.85	High	0	0.0004674	4.46
		Checked	Confidence	Identifying Node	PSM Ambiguity	Annotated Sequence	Modifications	# Protein Groups	# Proteins	Master Protein Accessions	Protein Accessions	# Missed Cleavages	Charge	DeltaScore	DeltaCn	Rank	Search Engine Rank	m/z [Da]	MH+ [Da]	Theo. MH+ [Da]	DeltaM [ppm]	Deltam/z [Da]	Activation Type	MS Order	Isolation Interference [%]	Ion Inject Time [ms]	RT [min]	First Scan	Spectrum File	File ID	XCorr	Percolator q-Value	Percolator PEP
		FALSE	High	Sequest HT (A2)	Unambiguous	NQVALNPQNTVFDAK		1	1	P0DMV9	P0DMV9	0	2	0.7016	0	1	1	829.931	1658.86	1658.85	3.24	0.00268	HCD (High Energy Collision Dissociation)	MS2	0	35.056	27.2538	28193	WQR_1_20190806.raw	F4	4.29	0	0.0004117
		FALSE	High	Sequest HT (A2)	Unambiguous	NQVALNPQNTVFDAK		1	1	P0DMV9	P0DMV9	0	2	0.6614	0	1	1	829.93	1658.85	1658.85	2.28	0.00189	HCD (High Energy Collision Dissociation)	MS2	0	2.049	27.3078	28265	WQR_1_20190806.raw	F4	4.46	0	0.0004674
		FALSE	High	Sequest HT (A2)	Unambiguous	NQVALNPQNTVFDAK		1	1	P0DMV9	P0DMV9	0	2	0.6319	0	1	1	829.931	1658.85	1658.85	2.5	0.00207	HCD (High Energy Collision Dissociation)	MS2	0	4.686	27.3592	28334	WQR_1_20190806.raw	F4	3.45	0.001475	0.09905
		FALSE	High	Sequest HT (A2)	Unambiguous	NQVALNPQNTVFDAK		1	1	P0DMV9	P0DMV9	0	2	0.5824	0	1	1	829.931	1658.85	1658.85	2.65	0.0022	HCD (High Energy Collision Dissociation)	MS2	0	2.144	27.3426	28310	WQR_1_20190806.raw	F4	3.76	0.002731	0.1631
	FALSE	High	NQVALNPQNTVFDAKR		0.00366093	0	1	1	2	P0DMV9	1	1814.95	High	0	0.00307	5.31
		Checked	Confidence	Identifying Node	PSM Ambiguity	Annotated Sequence	Modifications	# Protein Groups	# Proteins	Master Protein Accessions	Protein Accessions	# Missed Cleavages	Charge	DeltaScore	DeltaCn	Rank	Search Engine Rank	m/z [Da]	MH+ [Da]	Theo. MH+ [Da]	DeltaM [ppm]	Deltam/z [Da]	Activation Type	MS Order	Isolation Interference [%]	Ion Inject Time [ms]	RT [min]	First Scan	Spectrum File	File ID	XCorr	Percolator q-Value	Percolator PEP
		FALSE	High	Sequest HT (A2)	Unambiguous	NQVALNPQNTVFDAKR		1	1	P0DMV9	P0DMV9	1	3	0.6874	0	1	1	605.655	1814.95	1814.95	0.17	0.0001	HCD (High Energy Collision Dissociation)	MS2	32.0789	29.683	23.3756	23477	WQR_1_20190806.raw	F4	5.31	0	0.00307
		FALSE	High	Sequest HT (A2)	Unambiguous	NQVALNPQNTVFDAKR		1	1	P0DMV9	P0DMV9	1	3	0.3463	0	1	1	605.656	1814.95	1814.95	1.18	0.00071	HCD (High Energy Collision Dissociation)	MS2	65.3114	4.6	23.2696	23342	WQR_1_20190806.raw	F4	2.05	0.0007925	0.03368
	FALSE	High	VLDKCQEVISWLDANTLAEKDEFEHK	1xCarbamidomethyl [C5]	0.00558953	0	1	1	2	P0DMV9	2	3117.52	High	0	0.004788	4.48
		Checked	Confidence	Identifying Node	PSM Ambiguity	Annotated Sequence	Modifications	# Protein Groups	# Proteins	Master Protein Accessions	Protein Accessions	# Missed Cleavages	Charge	DeltaScore	DeltaCn	Rank	Search Engine Rank	m/z [Da]	MH+ [Da]	Theo. MH+ [Da]	DeltaM [ppm]	Deltam/z [Da]	Activation Type	MS Order	Isolation Interference [%]	Ion Inject Time [ms]	RT [min]	First Scan	Spectrum File	File ID	XCorr	Percolator q-Value	Percolator PEP
		FALSE	High	Sequest HT (A2)	Unambiguous	VLDKcQEVISWLDANTLAEKDEFEHK	C5(Carbamidomethyl)	1	1	P0DMV9	P0DMV9	2	4	0.5181	0	1	1	780.134	3117.51	3117.52	-2.37	-0.00185	HCD (High Energy Collision Dissociation)	MS2	51.1224	20.616	42.2867	46417	WQR_1_20190806.raw	F4	4.15	0	0.01329
		FALSE	High	Sequest HT (A2)	Unambiguous	VLDKcQEVISWLDANTLAEKDEFEHK	C5(Carbamidomethyl)	1	1	P0DMV9	P0DMV9	2	4	0.5848	0	1	1	780.134	3117.52	3117.52	-1.35	-0.00105	HCD (High Energy Collision Dissociation)	MS2	82.2822	20.11	42.2822	46413	WQR_1_20190806.raw	F4	4.48	0	0.004788
	FALSE	High	EIAEAYLGYPVTNAVITVPAYFNDSQR		2.2059e-05	0	1	1	6	P0DMV9	0	3001.49	High	0	1.5e-05	6.66
		Checked	Confidence	Identifying Node	PSM Ambiguity	Annotated Sequence	Modifications	# Protein Groups	# Proteins	Master Protein Accessions	Protein Accessions	# Missed Cleavages	Charge	DeltaScore	DeltaCn	Rank	Search Engine Rank	m/z [Da]	MH+ [Da]	Theo. MH+ [Da]	DeltaM [ppm]	Deltam/z [Da]	Activation Type	MS Order	Isolation Interference [%]	Ion Inject Time [ms]	RT [min]	First Scan	Spectrum File	File ID	XCorr	Percolator q-Value	Percolator PEP
		FALSE	High	Sequest HT (A2)	Unambiguous	EIAEAYLGYPVTNAVITVPAYFNDSQR		1	1	P0DMV9	P0DMV9	0	3	0.5949	0	1	1	1001.17	3001.5	3001.49	1.69	0.00169	HCD (High Energy Collision Dissociation)	MS2	0	45	51.8534	57306	WQR_1_20190806.raw	F4	5.53	0	0.0002136
		FALSE	High	Sequest HT (A2)	Unambiguous	EIAEAYLGYPVTNAVITVPAYFNDSQR		1	1	P0DMV9	P0DMV9	0	3	0.7039	0	1	1	1001.17	3001.5	3001.49	2.48	0.00248	HCD (High Energy Collision Dissociation)	MS2	0	30.062	51.774	57221	WQR_1_20190806.raw	F4	6.18	0	0.0002914
		FALSE	High	Sequest HT (A2)	Unambiguous	EIAEAYLGYPVTNAVITVPAYFNDSQR		1	1	P0DMV9	P0DMV9	0	3	0.6922	0	1	1	1001.17	3001.5	3001.49	1.99	0.00199	HCD (High Energy Collision Dissociation)	MS2	17.193	45	51.764	57211	WQR_1_20190806.raw	F4	6.66	0	1.5e-05
		FALSE	High	Sequest HT (A2)	Unambiguous	EIAEAYLGYPVTNAVITVPAYFNDSQR		1	1	P0DMV9	P0DMV9	0	3	0.5609	0	1	1	1001.17	3001.5	3001.49	1.99	0.00199	HCD (High Energy Collision Dissociation)	MS2	20.6429	45	51.7629	57210	WQR_1_20190806.raw	F4	5.83	0	0.0005269
		FALSE	High	Sequest HT (A2)	Unambiguous	EIAEAYLGYPVTNAVITVPAYFNDSQR		1	1	P0DMV9	P0DMV9	0	3	0.6426	0	1	1	1001.17	3001.5	3001.49	1.93	0.00193	HCD (High Energy Collision Dissociation)	MS2	12.2328	45	51.7329	57178	WQR_1_20190806.raw	F4	5.82	0	0.0004931
		FALSE	High	Sequest HT (A2)	Unambiguous	EIAEAYLGYPVTNAVITVPAYFNDSQR		1	1	P0DMV9	P0DMV9	0	3	0.7665	0	1	1	1001.17	3001.5	3001.49	1.02	0.00102	HCD (High Energy Collision Dissociation)	MS2	16.0224	7.432	51.9484	57413	WQR_1_20190806.raw	F4	5.44	0	0.00195
	FALSE	High	ELEQVCNPIISGLYQGAGGPGPGGFGAQGPK	1xCarbamidomethyl [C6]	5.1342e-07	0	1	1	6	P0DMV9	0	3055.49	High	0	1.606e-06	8.45
		Checked	Confidence	Identifying Node	PSM Ambiguity	Annotated Sequence	Modifications	# Protein Groups	# Proteins	Master Protein Accessions	Protein Accessions	# Missed Cleavages	Charge	DeltaScore	DeltaCn	Rank	Search Engine Rank	m/z [Da]	MH+ [Da]	Theo. MH+ [Da]	DeltaM [ppm]	Deltam/z [Da]	Activation Type	MS Order	Isolation Interference [%]	Ion Inject Time [ms]	RT [min]	First Scan	Spectrum File	File ID	XCorr	Percolator q-Value	Percolator PEP
		FALSE	High	Sequest HT (A2)	Unambiguous	ELEQVcNPIISGLYQGAGGPGPGGFGAQGPK	C6(Carbamidomethyl)	1	1	P0DMV9	P0DMV9	0	3	0.7306	0	1	1	1019.17	3055.5	3055.49	3.33	0.00339	HCD (High Energy Collision Dissociation)	MS2	0	45	44.7089	49281	WQR_1_20190806.raw	F4	7.61	0	5.674e-05
		FALSE	High	Sequest HT (A2)	Unambiguous	ELEQVcNPIISGLYQGAGGPGPGGFGAQGPK	C6(Carbamidomethyl)	1	1	P0DMV9	P0DMV9	0	3	0.7735	0	1	1	1019.17	3055.5	3055.49	3.33	0.00339	HCD (High Energy Collision Dissociation)	MS2	0	12.194	44.7058	49278	WQR_1_20190806.raw	F4	7.55	0	0.0002243
		FALSE	High	Sequest HT (A2)	Unambiguous	ELEQVcNPIISGLYQGAGGPGPGGFGAQGPK	C6(Carbamidomethyl)	1	1	P0DMV9	P0DMV9	0	3	0.7482	0	1	1	1019.17	3055.49	3055.49	0.15	0.00016	HCD (High Energy Collision Dissociation)	MS2	0	45	44.3543	48848	WQR_1_20190806.raw	F4	8.26	0	2.991e-07
		FALSE	High	Sequest HT (A2)	Unambiguous	ELEQVcNPIISGLYQGAGGPGPGGFGAQGPK	C6(Carbamidomethyl)	1	1	P0DMV9	P0DMV9	0	3	0.757	0	1	1	1019.17	3055.49	3055.49	0.15	0.00016	HCD (High Energy Collision Dissociation)	MS2	0	45	44.3522	48846	WQR_1_20190806.raw	F4	8.19	0	5.263e-06
		FALSE	High	Sequest HT (A2)	Unambiguous	ELEQVcNPIISGLYQGAGGPGPGGFGAQGPK	C6(Carbamidomethyl)	1	1	P0DMV9	P0DMV9	0	3	0.7609	0	1	1	1019.17	3055.49	3055.49	0.15	0.00016	HCD (High Energy Collision Dissociation)	MS2	0	45	44.3512	48845	WQR_1_20190806.raw	F4	8.45	0	1.606e-06
		FALSE	High	Sequest HT (A2)	Unambiguous	ELEQVcNPIISGLYQGAGGPGPGGFGAQGPK	C6(Carbamidomethyl)	1	1	P0DMV9	P0DMV9	0	3	0.7506	0	1	1	1019.17	3055.5	3055.49	3.15	0.00321	HCD (High Energy Collision Dissociation)	MS2	7.25893	44.19	44.3616	48856	WQR_1_20190806.raw	F4	7.86	0	1.163e-05
	FALSE	High	FGDPVVQSDMK	1xOxidation [M10]	0.0219671	0	1	1	1	P0DMV9	0	1238.57	High	0	0.01987	2.98
		Checked	Confidence	Identifying Node	PSM Ambiguity	Annotated Sequence	Modifications	# Protein Groups	# Proteins	Master Protein Accessions	Protein Accessions	# Missed Cleavages	Charge	DeltaScore	DeltaCn	Rank	Search Engine Rank	m/z [Da]	MH+ [Da]	Theo. MH+ [Da]	DeltaM [ppm]	Deltam/z [Da]	Activation Type	MS Order	Isolation Interference [%]	Ion Inject Time [ms]	RT [min]	First Scan	Spectrum File	File ID	XCorr	Percolator q-Value	Percolator PEP
		FALSE	High	Sequest HT (A2)	Unambiguous	FGDPVVQSDmK	M10(Oxidation)	1	1	P0DMV9	P0DMV9	0	2	0.7852	0	1	1	619.792	1238.58	1238.57	3.87	0.00239	HCD (High Energy Collision Dissociation)	MS2	0	45	15.9109	14599	WQR_1_20190806.raw	F4	2.98	0	0.01987
	FALSE	High	FGDPVVQSDMK		0.0236989	0	1	1	1	P0DMV9	0	1222.58	High	0	0.02146	3.02
		Checked	Confidence	Identifying Node	PSM Ambiguity	Annotated Sequence	Modifications	# Protein Groups	# Proteins	Master Protein Accessions	Protein Accessions	# Missed Cleavages	Charge	DeltaScore	DeltaCn	Rank	Search Engine Rank	m/z [Da]	MH+ [Da]	Theo. MH+ [Da]	DeltaM [ppm]	Deltam/z [Da]	Activation Type	MS Order	Isolation Interference [%]	Ion Inject Time [ms]	RT [min]	First Scan	Spectrum File	File ID	XCorr	Percolator q-Value	Percolator PEP
		FALSE	High	Sequest HT (A2)	Unambiguous	FGDPVVQSDMK		1	1	P0DMV9	P0DMV9	0	2	0.8113	0	1	1	611.793	1222.58	1222.58	1.85	0.00113	HCD (High Energy Collision Dissociation)	MS2	2.10789	4.134	20.6826	20169	WQR_1_20190806.raw	F4	3.02	0	0.02146
	FALSE	High	AFYPEEISSMVLTK	1xOxidation [M10]	0.00216544	0	2	2	6	P0DMV9; P34931	0	1630.8	High	0	0.001783	3.28
		Checked	Confidence	Identifying Node	PSM Ambiguity	Annotated Sequence	Modifications	# Protein Groups	# Proteins	Master Protein Accessions	Protein Accessions	# Missed Cleavages	Charge	DeltaScore	DeltaCn	Rank	Search Engine Rank	m/z [Da]	MH+ [Da]	Theo. MH+ [Da]	DeltaM [ppm]	Deltam/z [Da]	Activation Type	MS Order	Isolation Interference [%]	Ion Inject Time [ms]	RT [min]	First Scan	Spectrum File	File ID	XCorr	Percolator q-Value	Percolator PEP
		FALSE	High	Sequest HT (A2)	Unambiguous	AFYPEEISSmVLTK	M10(Oxidation)	2	2	P0DMV9; P34931	P0DMV9; P34931	0	2	0.6653	0	1	1	815.908	1630.81	1630.8	3.88	0.00317	HCD (High Energy Collision Dissociation)	MS2	45.5018	5.605	37.1264	40296	WQR_1_20190806.raw	F4	2.48	0	0.01268
		FALSE	High	Sequest HT (A2)	Unambiguous	AFYPEEISSmVLTK	M10(Oxidation)	2	2	P0DMV9; P34931	P0DMV9; P34931	0	3	0.6203	0	1	1	544.273	1630.8	1630.8	0.84	0.00046	HCD (High Energy Collision Dissociation)	MS2	66.0594	30.6	37.1911	40366	WQR_1_20190806.raw	F4	2.66	0	0.002853
		FALSE	High	Sequest HT (A2)	Unambiguous	AFYPEEISSmVLTK	M10(Oxidation)	2	2	P0DMV9; P34931	P0DMV9; P34931	0	2	0.6453	0	1	1	815.907	1630.81	1630.8	2.46	0.00201	HCD (High Energy Collision Dissociation)	MS2	39.4177	3.51	37.2131	40390	WQR_1_20190806.raw	F4	2.34	0	0.006007
		FALSE	High	Sequest HT (A2)	Unambiguous	AFYPEEISSmVLTK	M10(Oxidation)	2	2	P0DMV9; P34931	P0DMV9; P34931	0	2	0.7304	0	1	1	815.902	1630.8	1630.8	-3.68	-0.003	HCD (High Energy Collision Dissociation)	MS2	0	18.413	36.4411	39496	WQR_1_20190806.raw	F4	3.19	0	0.007833
		FALSE	High	Sequest HT (A2)	Unambiguous	AFYPEEISSmVLTK	M10(Oxidation)	2	2	P0DMV9; P34931	P0DMV9; P34931	0	2	0.7317	0	1	1	815.905	1630.8	1630.8	-0.46	-0.00037	HCD (High Energy Collision Dissociation)	MS2	0	8.31	36.45	39507	WQR_1_20190806.raw	F4	3.28	0	0.001783
		FALSE	High	Sequest HT (A2)	Unambiguous	AFYPEEISSmVLTK	M10(Oxidation)	2	2	P0DMV9; P34931	P0DMV9; P34931	0	2	0.6863	0	1	1	815.907	1630.81	1630.8	1.94	0.00158	HCD (High Energy Collision Dissociation)	MS2	0	7.995	36.5048	39579	WQR_1_20190806.raw	F4	2.71	0	0.007539
	FALSE	High	AAAIGIDLGTTYSCVGVFQHGK	1xCarbamidomethyl [C14]	6.18e-05	0	1	1	4	P0DMV9	0	2265.13	High	0	4.394e-05	5.65
		Checked	Confidence	Identifying Node	PSM Ambiguity	Annotated Sequence	Modifications	# Protein Groups	# Proteins	Master Protein Accessions	Protein Accessions	# Missed Cleavages	Charge	DeltaScore	DeltaCn	Rank	Search Engine Rank	m/z [Da]	MH+ [Da]	Theo. MH+ [Da]	DeltaM [ppm]	Deltam/z [Da]	Activation Type	MS Order	Isolation Interference [%]	Ion Inject Time [ms]	RT [min]	First Scan	Spectrum File	File ID	XCorr	Percolator q-Value	Percolator PEP
		FALSE	High	Sequest HT (A2)	Unambiguous	AAAIGIDLGTTYScVGVFQHGK	C14(Carbamidomethyl)	1	1	P0DMV9	P0DMV9	0	3	0.7234	0	1	1	755.717	2265.14	2265.13	1.72	0.0013	HCD (High Energy Collision Dissociation)	MS2	16.0028	5.911	38.4181	41827	WQR_1_20190806.raw	F4	5.35	0	0.000907
		FALSE	High	Sequest HT (A2)	Unambiguous	AAAIGIDLGTTYScVGVFQHGK	C14(Carbamidomethyl)	1	1	P0DMV9	P0DMV9	0	3	0.7429	0	1	1	755.717	2265.14	2265.13	1.72	0.0013	HCD (High Energy Collision Dissociation)	MS2	21.5731	5.175	38.4175	41826	WQR_1_20190806.raw	F4	4.94	0	0.0004428
		FALSE	High	Sequest HT (A2)	Unambiguous	AAAIGIDLGTTYScVGVFQHGK	C14(Carbamidomethyl)	1	1	P0DMV9	P0DMV9	0	3	0.6516	0	1	1	755.717	2265.14	2265.13	1.72	0.0013	HCD (High Energy Collision Dissociation)	MS2	13.9823	6.546	38.4193	41829	WQR_1_20190806.raw	F4	4.42	0	0.001962
		FALSE	High	Sequest HT (A2)	Unambiguous	AAAIGIDLGTTYScVGVFQHGK	C14(Carbamidomethyl)	1	1	P0DMV9	P0DMV9	0	3	0.7133	0	1	1	755.715	2265.13	2265.13	-1.11	-0.00084	HCD (High Energy Collision Dissociation)	MS2	13.8643	9.931	38.1577	41505	WQR_1_20190806.raw	F4	5.65	0	4.394e-05
	FALSE	High	AFYPEEISSMVLTK		0.00754709	0	2	2	9	P0DMV9; P34931	0	1614.81	High	0	0.01937	3.94
		Checked	Confidence	Identifying Node	PSM Ambiguity	Annotated Sequence	Modifications	# Protein Groups	# Proteins	Master Protein Accessions	Protein Accessions	# Missed Cleavages	Charge	DeltaScore	DeltaCn	Rank	Search Engine Rank	m/z [Da]	MH+ [Da]	Theo. MH+ [Da]	DeltaM [ppm]	Deltam/z [Da]	Activation Type	MS Order	Isolation Interference [%]	Ion Inject Time [ms]	RT [min]	First Scan	Spectrum File	File ID	XCorr	Percolator q-Value	Percolator PEP
		FALSE	High	Sequest HT (A2)	Unambiguous	AFYPEEISSMVLTK		2	2	P0DMV9; P34931	P0DMV9; P34931	0	3	0.5989	0	1	1	538.941	1614.81	1614.81	-0.33	-0.00018	HCD (High Energy Collision Dissociation)	MS2	0	6.808	43.9091	48314	WQR_1_20190806.raw	F4	3.64	0	0.008927
		FALSE	High	Sequest HT (A2)	Unambiguous	AFYPEEISSMVLTK		2	2	P0DMV9; P34931	P0DMV9; P34931	0	3	0.536	0	1	1	538.941	1614.81	1614.81	0.8	0.00043	HCD (High Energy Collision Dissociation)	MS2	6.17452	10.564	43.8983	48301	WQR_1_20190806.raw	F4	3.75	0	0.00847
		FALSE	High	Sequest HT (A2)	Unambiguous	AFYPEEISSMVLTK		2	2	P0DMV9; P34931	P0DMV9; P34931	0	2	0.5756	0	1	1	807.909	1614.81	1614.81	1.45	0.00117	HCD (High Energy Collision Dissociation)	MS2	0	4.733	43.834	48223	WQR_1_20190806.raw	F4	2.71	0	0.01143
		FALSE	High	Sequest HT (A2)	Unambiguous	AFYPEEISSMVLTK		2	2	P0DMV9; P34931	P0DMV9; P34931	0	2	0.6461	0	1	1	807.909	1614.81	1614.81	1	0.00081	HCD (High Energy Collision Dissociation)	MS2	0	5.499	43.8079	48193	WQR_1_20190806.raw	F4	3.08	0	0.006541
		FALSE	High	Sequest HT (A2)	Unambiguous	AFYPEEISSMVLTK		2	2	P0DMV9; P34931	P0DMV9; P34931	0	2	0.6026	0	1	1	807.909	1614.81	1614.81	1.83	0.00148	HCD (High Energy Collision Dissociation)	MS2	11.941	40.942	43.711	48084	WQR_1_20190806.raw	F4	3.02	0	0.008839
		FALSE	High	Sequest HT (A2)	Unambiguous	AFYPEEISSMVLTK		2	2	P0DMV9; P34931	P0DMV9; P34931	0	3	0.5661	0	1	1	538.941	1614.81	1614.81	-0.33	-0.00018	HCD (High Energy Collision Dissociation)	MS2	0	7.061	43.9114	48318	WQR_1_20190806.raw	F4	3.48	0	0.007342
		FALSE	High	Sequest HT (A2)	Unambiguous	AFYPEEISSMVLTK		2	2	P0DMV9; P34931	P0DMV9; P34931	0	3	0.5964	0	1	1	538.941	1614.81	1614.81	0.23	0.00013	HCD (High Energy Collision Dissociation)	MS2	0	5.755	44.003	48429	WQR_1_20190806.raw	F4	3.94	0	0.01937
		FALSE	High	Sequest HT (A2)	Unambiguous	AFYPEEISSMVLTK		2	2	P0DMV9; P34931	P0DMV9; P34931	0	2	0.5726	0	1	1	807.91	1614.81	1614.81	2.13	0.00172	HCD (High Energy Collision Dissociation)	MS2	0	0.771	44.1485	48602	WQR_1_20190806.raw	F4	2.41	0	0.006855
		FALSE	High	Sequest HT (A2)	Unambiguous	AFYPEEISSMVLTK		2	2	P0DMV9; P34931	P0DMV9; P34931	0	2	0.5891	0	1	1	807.908	1614.81	1614.81	0.55	0.00044	HCD (High Energy Collision Dissociation)	MS2	14.0939	8.16	43.9108	48317	WQR_1_20190806.raw	F4	2.02	0.001475	0.1032
	FALSE	High	DAGVIAGLNVLR		0.0133509	0	2	2	2	P0DMV9; P34931	0	1197.69	High	0	0.01185	3.55
		Checked	Confidence	Identifying Node	PSM Ambiguity	Annotated Sequence	Modifications	# Protein Groups	# Proteins	Master Protein Accessions	Protein Accessions	# Missed Cleavages	Charge	DeltaScore	DeltaCn	Rank	Search Engine Rank	m/z [Da]	MH+ [Da]	Theo. MH+ [Da]	DeltaM [ppm]	Deltam/z [Da]	Activation Type	MS Order	Isolation Interference [%]	Ion Inject Time [ms]	RT [min]	First Scan	Spectrum File	File ID	XCorr	Percolator q-Value	Percolator PEP
		FALSE	High	Sequest HT (A2)	Unambiguous	DAGVIAGLNVLR		2	2	P0DMV9; P34931	P0DMV9; P34931	0	2	0.7611	0	1	1	599.355	1197.7	1197.69	5.91	0.00354	HCD (High Energy Collision Dissociation)	MS2	9.87257	26.905	37.8779	41170	WQR_1_20190806.raw	F4	3.39	0	0.01517
		FALSE	High	Sequest HT (A2)	Unambiguous	DAGVIAGLNVLR		2	2	P0DMV9; P34931	P0DMV9; P34931	0	2	0.7296	0	1	1	599.352	1197.7	1197.69	1.32	0.00079	HCD (High Energy Collision Dissociation)	MS2	0	45	38.4896	41921	WQR_1_20190806.raw	F4	3.55	0	0.01185
	FALSE	High	CQEVISWLDANTLAEKDEFEHKR	1xCarbamidomethyl [C1]	0.000423523	0	1	1	2	P0DMV9	2	2818.35	High	0	0.0003254	6.36
		Checked	Confidence	Identifying Node	PSM Ambiguity	Annotated Sequence	Modifications	# Protein Groups	# Proteins	Master Protein Accessions	Protein Accessions	# Missed Cleavages	Charge	DeltaScore	DeltaCn	Rank	Search Engine Rank	m/z [Da]	MH+ [Da]	Theo. MH+ [Da]	DeltaM [ppm]	Deltam/z [Da]	Activation Type	MS Order	Isolation Interference [%]	Ion Inject Time [ms]	RT [min]	First Scan	Spectrum File	File ID	XCorr	Percolator q-Value	Percolator PEP
		FALSE	High	Sequest HT (A2)	Unambiguous	cQEVISWLDANTLAEKDEFEHKR	C1(Carbamidomethyl)	1	1	P0DMV9	P0DMV9	2	4	0.491	0	1	1	705.34	2818.34	2818.35	-3.43	-0.00241	HCD (High Energy Collision Dissociation)	MS2	66.792	24.325	36.2673	39276	WQR_1_20190806.raw	F4	6.11	0	0.004351
		FALSE	High	Sequest HT (A2)	Unambiguous	cQEVISWLDANTLAEKDEFEHKR	C1(Carbamidomethyl)	1	1	P0DMV9	P0DMV9	2	5	0.7563	0	1	1	564.476	2818.35	2818.35	1.16	0.00065	HCD (High Energy Collision Dissociation)	MS2	74.6242	6.351	36.3065	39324	WQR_1_20190806.raw	F4	6.36	0	0.0003254
	FALSE	High	CQEVISWLDANTLAEKDEFEHK	1xCarbamidomethyl [C1]	0.000620271	0	1	1	4	P0DMV9	1	2662.25	High	0	0.0007571	5.52
		Checked	Confidence	Identifying Node	PSM Ambiguity	Annotated Sequence	Modifications	# Protein Groups	# Proteins	Master Protein Accessions	Protein Accessions	# Missed Cleavages	Charge	DeltaScore	DeltaCn	Rank	Search Engine Rank	m/z [Da]	MH+ [Da]	Theo. MH+ [Da]	DeltaM [ppm]	Deltam/z [Da]	Activation Type	MS Order	Isolation Interference [%]	Ion Inject Time [ms]	RT [min]	First Scan	Spectrum File	File ID	XCorr	Percolator q-Value	Percolator PEP
		FALSE	High	Sequest HT (A2)	Unambiguous	cQEVISWLDANTLAEKDEFEHK	C1(Carbamidomethyl)	1	1	P0DMV9	P0DMV9	1	4	0.7029	0	1	1	666.317	2662.25	2662.25	0.33	0.00022	HCD (High Energy Collision Dissociation)	MS2	20.6431	12.494	39.6902	43332	WQR_1_20190806.raw	F4	5.52	0	0.0007571
		FALSE	High	Sequest HT (A2)	Unambiguous	cQEVISWLDANTLAEKDEFEHK	C1(Carbamidomethyl)	1	1	P0DMV9	P0DMV9	1	3	0.7265	0	1	1	888.078	2662.22	2662.25	-9.25	-0.00821	HCD (High Energy Collision Dissociation)	MS2	50.5099	45	49.8608	55187	WQR_1_20190806.raw	F4	4.57	0	0.0004848
		FALSE	High	Sequest HT (A2)	Unambiguous	cQEVISWLDANTLAEKDEFEHK	C1(Carbamidomethyl)	1	1	P0DMV9	P0DMV9	1	3	0.6149	0	1	1	888.079	2662.22	2662.25	-8.28	-0.00735	HCD (High Energy Collision Dissociation)	MS2	74.4136	35.167	49.0251	54225	WQR_1_20190806.raw	F4	3.35	0	0.0006566
		FALSE	High	Sequest HT (A2)	Unambiguous	cQEVISWLDANTLAEKDEFEHK	C1(Carbamidomethyl)	1	1	P0DMV9	P0DMV9	1	3	0.5746	0	1	1	888.088	2662.25	2662.25	1.69	0.0015	HCD (High Energy Collision Dissociation)	MS2	69.0502	45	38.8475	42338	WQR_1_20190806.raw	F4	3.55	0.001475	0.09937
	FALSE	High	CQEVISWLDANTLAEK	1xCarbamidomethyl [C1]	0.000109533	0	1	1	1	P0DMV9	0	1876.91	High	0	7.95e-05	4.58
		Checked	Confidence	Identifying Node	PSM Ambiguity	Annotated Sequence	Modifications	# Protein Groups	# Proteins	Master Protein Accessions	Protein Accessions	# Missed Cleavages	Charge	DeltaScore	DeltaCn	Rank	Search Engine Rank	m/z [Da]	MH+ [Da]	Theo. MH+ [Da]	DeltaM [ppm]	Deltam/z [Da]	Activation Type	MS Order	Isolation Interference [%]	Ion Inject Time [ms]	RT [min]	First Scan	Spectrum File	File ID	XCorr	Percolator q-Value	Percolator PEP
		FALSE	High	Sequest HT (A2)	Unambiguous	cQEVISWLDANTLAEK	C1(Carbamidomethyl)	1	1	P0DMV9	P0DMV9	0	2	0.7074	0	1	1	938.959	1876.91	1876.91	-0.52	-0.00049	HCD (High Energy Collision Dissociation)	MS2	0	45	42.656	46846	WQR_1_20190806.raw	F4	4.58	0	7.95e-05
	FALSE	High	ATAGDTHLGGEDFDNR		0.0003312	0	3	4	7	P17066; P0DMV9; P34931	0	1675.73	High	0	0.001384	4.56
		Checked	Confidence	Identifying Node	PSM Ambiguity	Annotated Sequence	Modifications	# Protein Groups	# Proteins	Master Protein Accessions	Protein Accessions	# Missed Cleavages	Charge	DeltaScore	DeltaCn	Rank	Search Engine Rank	m/z [Da]	MH+ [Da]	Theo. MH+ [Da]	DeltaM [ppm]	Deltam/z [Da]	Activation Type	MS Order	Isolation Interference [%]	Ion Inject Time [ms]	RT [min]	First Scan	Spectrum File	File ID	XCorr	Percolator q-Value	Percolator PEP
		FALSE	High	Sequest HT (A2)	Unambiguous	ATAGDTHLGGEDFDNR		3	4	P17066; P0DMV9; P34931	P48741; P17066; P0DMV9; P34931	0	3	0.6582	0	1	1	559.249	1675.73	1675.73	1.54	0.00086	HCD (High Energy Collision Dissociation)	MS2	14.2909	32.343	15.1505	13737	WQR_1_20190806.raw	F4	3.16	0	0.009655
		FALSE	High	Sequest HT (A2)	Unambiguous	ATAGDTHLGGEDFDNR		3	4	P17066; P0DMV9; P34931	P48741; P17066; P0DMV9; P34931	0	3	0.7013	0	1	1	559.25	1675.74	1675.73	2.74	0.00153	HCD (High Energy Collision Dissociation)	MS2	0	0.199	15.4746	14103	WQR_1_20190806.raw	F4	3.18	0	0.004585
		FALSE	High	Sequest HT (A2)	Unambiguous	ATAGDTHLGGEDFDNR		3	4	P17066; P0DMV9; P34931	P48741; P17066; P0DMV9; P34931	0	2	0.7305	0	1	1	838.37	1675.73	1675.73	1.51	0.00127	HCD (High Energy Collision Dissociation)	MS2	0	1.103	15.4752	14104	WQR_1_20190806.raw	F4	3.97	0	0.000252
		FALSE	High	Sequest HT (A2)	Unambiguous	ATAGDTHLGGEDFDNR		3	4	P17066; P0DMV9; P34931	P48741; P17066; P0DMV9; P34931	0	2	0.7105	0	1	1	838.37	1675.73	1675.73	1.51	0.00127	HCD (High Energy Collision Dissociation)	MS2	0	0.962	15.4758	14105	WQR_1_20190806.raw	F4	4.56	0	0.001384
		FALSE	High	Sequest HT (A2)	Unambiguous	ATAGDTHLGGEDFDNR		3	4	P17066; P0DMV9; P34931	P48741; P17066; P0DMV9; P34931	0	3	0.605	0	1	1	559.25	1675.74	1675.73	2.74	0.00153	HCD (High Energy Collision Dissociation)	MS2	0.183402	0.344	15.477	14107	WQR_1_20190806.raw	F4	2.81	0	0.01291
		FALSE	High	Sequest HT (A2)	Unambiguous	ATAGDTHLGGEDFDNR		3	4	P17066; P0DMV9; P34931	P48741; P17066; P0DMV9; P34931	0	2	0.7567	0	1	1	838.37	1675.73	1675.73	1.59	0.00133	HCD (High Energy Collision Dissociation)	MS2	0	1.606	15.4798	14109	WQR_1_20190806.raw	F4	3.74	0	0.001624
		FALSE	High	Sequest HT (A2)	Unambiguous	ATAGDTHLGGEDFDNR		3	4	P17066; P0DMV9; P34931	P48741; P17066; P0DMV9; P34931	0	3	0.5375	0	1	1	559.249	1675.73	1675.73	1.65	0.00092	HCD (High Energy Collision Dissociation)	MS2	47.7999	45	15.2349	13834	WQR_1_20190806.raw	F4	2.53	0.00453	0.2433
	FALSE	High	ARFEELCSDLFR	1xCarbamidomethyl [C7]	0.0066199	0	2	3	1	P17066; P0DMV9	1	1542.74	High	0	0.005696	3.94
		Checked	Confidence	Identifying Node	PSM Ambiguity	Annotated Sequence	Modifications	# Protein Groups	# Proteins	Master Protein Accessions	Protein Accessions	# Missed Cleavages	Charge	DeltaScore	DeltaCn	Rank	Search Engine Rank	m/z [Da]	MH+ [Da]	Theo. MH+ [Da]	DeltaM [ppm]	Deltam/z [Da]	Activation Type	MS Order	Isolation Interference [%]	Ion Inject Time [ms]	RT [min]	First Scan	Spectrum File	File ID	XCorr	Percolator q-Value	Percolator PEP
		FALSE	High	Sequest HT (A2)	Unambiguous	ARFEELcSDLFR	C7(Carbamidomethyl)	2	3	P17066; P0DMV9	P48741; P17066; P0DMV9	1	2	0.5482	0	1	1	771.874	1542.74	1542.74	2.01	0.00155	HCD (High Energy Collision Dissociation)	MS2	0	36.015	33.5195	35934	WQR_1_20190806.raw	F4	3.94	0	0.005696
	FALSE	High	KELEQVCNPIISGLYQGAGGPGPGGFGAQGPK	1xCarbamidomethyl [C7]	7.2276e-09	0	1	1	2	P0DMV9	1	3183.59	High	0	3.52817e-09	10.17
		Checked	Confidence	Identifying Node	PSM Ambiguity	Annotated Sequence	Modifications	# Protein Groups	# Proteins	Master Protein Accessions	Protein Accessions	# Missed Cleavages	Charge	DeltaScore	DeltaCn	Rank	Search Engine Rank	m/z [Da]	MH+ [Da]	Theo. MH+ [Da]	DeltaM [ppm]	Deltam/z [Da]	Activation Type	MS Order	Isolation Interference [%]	Ion Inject Time [ms]	RT [min]	First Scan	Spectrum File	File ID	XCorr	Percolator q-Value	Percolator PEP
		FALSE	High	Sequest HT (A2)	Unambiguous	KELEQVcNPIISGLYQGAGGPGPGGFGAQGPK	C7(Carbamidomethyl)	1	1	P0DMV9	P0DMV9	1	3	0.821	0	1	1	1061.87	3183.61	3183.59	5.08	0.00539	HCD (High Energy Collision Dissociation)	MS2	0	45	39.5398	43159	WQR_1_20190806.raw	F4	10.17	0	3.52817e-09
		FALSE	High	Sequest HT (A2)	Unambiguous	KELEQVcNPIISGLYQGAGGPGPGGFGAQGPK	C7(Carbamidomethyl)	1	1	P0DMV9	P0DMV9	1	3	0.7988	0	1	1	1061.87	3183.6	3183.59	2.2	0.00234	HCD (High Energy Collision Dissociation)	MS2	0	45	39.3956	42982	WQR_1_20190806.raw	F4	10.09	0	2.341e-08
	FALSE	High	HWPFQVINDGDKPK		0.000157053	0	1	1	20	P0DMV9	0	1680.85	High	0	0.001026	4.69
		Checked	Confidence	Identifying Node	PSM Ambiguity	Annotated Sequence	Modifications	# Protein Groups	# Proteins	Master Protein Accessions	Protein Accessions	# Missed Cleavages	Charge	DeltaScore	DeltaCn	Rank	Search Engine Rank	m/z [Da]	MH+ [Da]	Theo. MH+ [Da]	DeltaM [ppm]	Deltam/z [Da]	Activation Type	MS Order	Isolation Interference [%]	Ion Inject Time [ms]	RT [min]	First Scan	Spectrum File	File ID	XCorr	Percolator q-Value	Percolator PEP
		FALSE	High	Sequest HT (A2)	Unambiguous	HWPFQVINDGDKPK		1	1	P0DMV9	P0DMV9	0	3	0.7279	0	1	1	560.955	1680.85	1680.85	-0.14	-8e-05	HCD (High Energy Collision Dissociation)	MS2	31.563	8.987	25.7978	26394	WQR_1_20190806.raw	F4	4.52	0	0.007136
		FALSE	High	Sequest HT (A2)	Unambiguous	HWPFQVINDGDKPK		1	1	P0DMV9	P0DMV9	0	4	0.7206	0	1	1	420.968	1680.85	1680.85	0.73	0.0003	HCD (High Energy Collision Dissociation)	MS2	0	14.796	26.057	26717	WQR_1_20190806.raw	F4	3.83	0	0.008275
		FALSE	High	Sequest HT (A2)	Unambiguous	HWPFQVINDGDKPK		1	1	P0DMV9	P0DMV9	0	2	0.7375	0	1	1	840.929	1680.85	1680.85	0.52	0.00044	HCD (High Energy Collision Dissociation)	MS2	0	39.059	26.0657	26727	WQR_1_20190806.raw	F4	3.39	0	0.0001157
		FALSE	High	Sequest HT (A2)	Unambiguous	HWPFQVINDGDKPK		1	1	P0DMV9	P0DMV9	0	2	0.701	0	1	1	840.929	1680.85	1680.85	0.52	0.00044	HCD (High Energy Collision Dissociation)	MS2	0	45	26.0752	26738	WQR_1_20190806.raw	F4	3.11	0	0.001325
		FALSE	High	Sequest HT (A2)	Unambiguous	HWPFQVINDGDKPK		1	1	P0DMV9	P0DMV9	0	2	0.7612	0	1	1	840.93	1680.85	1680.85	2.56	0.00215	HCD (High Energy Collision Dissociation)	MS2	0	8.254	26.8304	27665	WQR_1_20190806.raw	F4	2.89	0	0.002878
		FALSE	High	Sequest HT (A2)	Unambiguous	HWPFQVINDGDKPK		1	1	P0DMV9	P0DMV9	0	2	0.6503	0	1	1	840.93	1680.85	1680.85	2.56	0.00215	HCD (High Energy Collision Dissociation)	MS2	0	8.014	26.8298	27664	WQR_1_20190806.raw	F4	3.26	0	0.0009195
		FALSE	High	Sequest HT (A2)	Unambiguous	HWPFQVINDGDKPK		1	1	P0DMV9	P0DMV9	0	3	0.7719	0	1	1	560.955	1680.85	1680.85	1.28	0.00072	HCD (High Energy Collision Dissociation)	MS2	1.62856	0.513	26.7634	27580	WQR_1_20190806.raw	F4	4.69	0	0.001026
		FALSE	High	Sequest HT (A2)	Unambiguous	HWPFQVINDGDKPK		1	1	P0DMV9	P0DMV9	0	4	0.8031	0	1	1	420.968	1680.85	1680.85	1.16	0.00049	HCD (High Energy Collision Dissociation)	MS2	4.5273	6.972	26.4257	27172	WQR_1_20190806.raw	F4	3.81	0	0.005462
		FALSE	High	Sequest HT (A2)	Unambiguous	HWPFQVINDGDKPK		1	1	P0DMV9	P0DMV9	0	3	0.7976	0	1	1	560.956	1680.85	1680.85	1.6	0.0009	HCD (High Energy Collision Dissociation)	MS2	1.74263	0.439	26.5424	27308	WQR_1_20190806.raw	F4	4.15	0	0.0004189
		FALSE	High	Sequest HT (A2)	Unambiguous	HWPFQVINDGDKPK		1	1	P0DMV9	P0DMV9	0	3	0.815	0	1	1	560.956	1680.85	1680.85	1.6	0.0009	HCD (High Energy Collision Dissociation)	MS2	3.62042	0.404	26.559	27329	WQR_1_20190806.raw	F4	4.27	0	0.00313
		FALSE	High	Sequest HT (A2)	Unambiguous	HWPFQVINDGDKPK		1	1	P0DMV9	P0DMV9	0	3	0.7532	0	1	1	560.955	1680.85	1680.85	1.39	0.00078	HCD (High Energy Collision Dissociation)	MS2	0.352423	0.423	26.5748	27349	WQR_1_20190806.raw	F4	3.93	0	0.003381
		FALSE	High	Sequest HT (A2)	Unambiguous	HWPFQVINDGDKPK		1	1	P0DMV9	P0DMV9	0	4	0.7644	0	1	1	420.968	1680.85	1680.85	0.73	0.0003	HCD (High Energy Collision Dissociation)	MS2	49.3312	7.187	26.5918	27370	WQR_1_20190806.raw	F4	3.82	0	0.01363
		FALSE	High	Sequest HT (A2)	Unambiguous	HWPFQVINDGDKPK		1	1	P0DMV9	P0DMV9	0	2	0.7199	0	1	1	840.931	1680.85	1680.85	2.92	0.00245	HCD (High Energy Collision Dissociation)	MS2	0	45	26.4293	27176	WQR_1_20190806.raw	F4	2.82	0.0007925	0.03165
		FALSE	High	Sequest HT (A2)	Unambiguous	HWPFQVINDGDKPK		1	1	P0DMV9	P0DMV9	0	3	0.7167	0	1	1	560.956	1680.85	1680.85	1.71	0.00096	HCD (High Energy Collision Dissociation)	MS2	4.78688	0.778	26.5924	27371	WQR_1_20190806.raw	F4	4.06	0.0007925	0.03423
		FALSE	High	Sequest HT (A2)	Unambiguous	HWPFQVINDGDKPK		1	1	P0DMV9	P0DMV9	0	3	0.6911	0	1	1	560.956	1680.85	1680.85	2.26	0.00127	HCD (High Energy Collision Dissociation)	MS2	4.2799	1.8	26.7424	27555	WQR_1_20190806.raw	F4	4.63	0.0007925	0.04973
		FALSE	High	Sequest HT (A2)	Unambiguous	HWPFQVINDGDKPK		1	1	P0DMV9	P0DMV9	0	3	0.5965	0	1	1	560.956	1680.85	1680.85	1.82	0.00102	HCD (High Energy Collision Dissociation)	MS2	12.5582	1.969	26.6225	27407	WQR_1_20190806.raw	F4	3.99	0.0007925	0.05901
		FALSE	High	Sequest HT (A2)	Unambiguous	HWPFQVINDGDKPK		1	1	P0DMV9	P0DMV9	0	4	0.7655	0	1	1	420.968	1680.85	1680.85	1.45	0.00061	HCD (High Energy Collision Dissociation)	MS2	0	19.39	26.8583	27703	WQR_1_20190806.raw	F4	3.71	0.001475	0.1038
		FALSE	High	Sequest HT (A2)	Unambiguous	HWPFQVINDGDKPK		1	1	P0DMV9	P0DMV9	0	3	0.7232	0	1	1	560.955	1680.85	1680.85	0.41	0.00023	HCD (High Energy Collision Dissociation)	MS2	36.2966	7.056	25.8145	26416	WQR_1_20190806.raw	F4	3.83	0.001475	0.08252
		FALSE	High	Sequest HT (A2)	Unambiguous	HWPFQVINDGDKPK		1	1	P0DMV9	P0DMV9	0	3	0.5978	0	1	1	560.956	1680.85	1680.85	2.04	0.00114	HCD (High Energy Collision Dissociation)	MS2	79.116	3.973	25.786	26380	WQR_1_20190806.raw	F4	2.71	0.002119	0.1355
		FALSE	High	Sequest HT (A2)	Unambiguous	HWPFQVINDGDKPK		1	1	P0DMV9	P0DMV9	0	3	0.6578	0	1	1	560.955	1680.85	1680.85	0.84	0.00047	HCD (High Energy Collision Dissociation)	MS2	38.1024	8.807	25.8306	26434	WQR_1_20190806.raw	F4	3.74	0.002731	0.1543
	FALSE	High	KFGDPVVQSDMK		0.00271041	0	1	1	1	P0DMV9	1	1350.67	High	0	0.002247	3.71
		Checked	Confidence	Identifying Node	PSM Ambiguity	Annotated Sequence	Modifications	# Protein Groups	# Proteins	Master Protein Accessions	Protein Accessions	# Missed Cleavages	Charge	DeltaScore	DeltaCn	Rank	Search Engine Rank	m/z [Da]	MH+ [Da]	Theo. MH+ [Da]	DeltaM [ppm]	Deltam/z [Da]	Activation Type	MS Order	Isolation Interference [%]	Ion Inject Time [ms]	RT [min]	First Scan	Spectrum File	File ID	XCorr	Percolator q-Value	Percolator PEP
		FALSE	High	Sequest HT (A2)	Unambiguous	KFGDPVVQSDMK		1	1	P0DMV9	P0DMV9	1	2	0.6523	0	1	1	675.84	1350.67	1350.67	1.05	0.00071	HCD (High Energy Collision Dissociation)	MS2	20.5875	35.982	17.304	16198	WQR_1_20190806.raw	F4	3.71	0	0.002247
	FALSE	High	KFGDPVVQSDMK	1xOxidation [M11]	0.0050073	0	1	1	1	P0DMV9	1	1366.67	High	0	0.004271	4.05
		Checked	Confidence	Identifying Node	PSM Ambiguity	Annotated Sequence	Modifications	# Protein Groups	# Proteins	Master Protein Accessions	Protein Accessions	# Missed Cleavages	Charge	DeltaScore	DeltaCn	Rank	Search Engine Rank	m/z [Da]	MH+ [Da]	Theo. MH+ [Da]	DeltaM [ppm]	Deltam/z [Da]	Activation Type	MS Order	Isolation Interference [%]	Ion Inject Time [ms]	RT [min]	First Scan	Spectrum File	File ID	XCorr	Percolator q-Value	Percolator PEP
		FALSE	High	Sequest HT (A2)	Unambiguous	KFGDPVVQSDmK	M11(Oxidation)	1	1	P0DMV9	P0DMV9	1	2	0.7679	0	1	1	683.838	1366.67	1366.67	0.56	0.00038	HCD (High Energy Collision Dissociation)	MS2	0	45	13.2317	11506	WQR_1_20190806.raw	F4	4.05	0	0.004271
	FALSE	High	YKAEDEVQR		0.0585375	0.00152962	2	2	1	P0DMV9; P34931	1	1137.55	High	0.0007925	0.05487	2.34
		Checked	Confidence	Identifying Node	PSM Ambiguity	Annotated Sequence	Modifications	# Protein Groups	# Proteins	Master Protein Accessions	Protein Accessions	# Missed Cleavages	Charge	DeltaScore	DeltaCn	Rank	Search Engine Rank	m/z [Da]	MH+ [Da]	Theo. MH+ [Da]	DeltaM [ppm]	Deltam/z [Da]	Activation Type	MS Order	Isolation Interference [%]	Ion Inject Time [ms]	RT [min]	First Scan	Spectrum File	File ID	XCorr	Percolator q-Value	Percolator PEP
		FALSE	High	Sequest HT (A2)	Unambiguous	YKAEDEVQR		2	2	P0DMV9; P34931	P0DMV9; P34931	1	2	0.5171	0	1	1	569.281	1137.55	1137.55	0.78	0.00045	HCD (High Energy Collision Dissociation)	MS2	0	44.834	7.8675	5200	WQR_1_20190806.raw	F4	2.34	0.0007925	0.05487
	FALSE	High	VEIIANDQGNR		0.0543262	0.00152962	5	7	6	P17066; P11142; P11021; P0DMV9; P34931	0	1228.63	High	0.0007925	0.05308	3.02
		Checked	Confidence	Identifying Node	PSM Ambiguity	Annotated Sequence	Modifications	# Protein Groups	# Proteins	Master Protein Accessions	Protein Accessions	# Missed Cleavages	Charge	DeltaScore	DeltaCn	Rank	Search Engine Rank	m/z [Da]	MH+ [Da]	Theo. MH+ [Da]	DeltaM [ppm]	Deltam/z [Da]	Activation Type	MS Order	Isolation Interference [%]	Ion Inject Time [ms]	RT [min]	First Scan	Spectrum File	File ID	XCorr	Percolator q-Value	Percolator PEP
		FALSE	High	Sequest HT (A2)	Unambiguous	VEIIANDQGNR		4	5	P11142; P11021; P0DMV9; P34931	P54652; P11142; P11021; P0DMV9; P34931	0	2		0	1	2	614.818	1228.63	1228.63	-0.05	-3e-05	HCD (High Energy Collision Dissociation)	MS2	53.266	45	13.8411	12226	WQR_1_20190806.raw	F4	2.96	0.0007925	0.05085
		FALSE	High	Sequest HT (A2)	Unambiguous	VEIIANDQGNR		4	5	P11142; P11021; P0DMV9; P34931	P54652; P11142; P11021; P0DMV9; P34931	0	2	0	0	1	1	614.817	1228.63	1228.63	-0.55	-0.00034	HCD (High Energy Collision Dissociation)	MS2	14.9929	45	13.8462	12231	WQR_1_20190806.raw	F4	3.02	0.0007925	0.05308
		FALSE	High	Sequest HT (A2)	Unambiguous	VEILANDQGNR		2	2	P17066	P48741; P17066	0	2		0	1	2	614.817	1228.63	1228.63	-0.55	-0.00034	HCD (High Energy Collision Dissociation)	MS2	14.9929	45	13.8462	12231	WQR_1_20190806.raw	F4	3.02	0.0007925	0.05308
		FALSE	High	Sequest HT (A2)	Unambiguous	VEILANDQGNR		2	2	P17066	P48741; P17066	0	2	0	0	1	1	614.818	1228.63	1228.63	-0.05	-3e-05	HCD (High Energy Collision Dissociation)	MS2	53.266	45	13.8411	12226	WQR_1_20190806.raw	F4	2.96	0.0007925	0.05085
		FALSE	High	Sequest HT (A2)	Unambiguous	VEILANDQGNR		2	2	P17066	P48741; P17066	0	2	0	0	1	1	614.817	1228.63	1228.63	-0.75	-0.00046	HCD (High Energy Collision Dissociation)	MS2	0	45	13.879	12268	WQR_1_20190806.raw	F4	2.66	0.002119	0.121
		FALSE	High	Sequest HT (A2)	Unambiguous	VEIIANDQGNR		4	5	P11142; P11021; P0DMV9; P34931	P54652; P11142; P11021; P0DMV9; P34931	0	2		0	1	2	614.817	1228.63	1228.63	-0.75	-0.00046	HCD (High Energy Collision Dissociation)	MS2	0	45	13.879	12268	WQR_1_20190806.raw	F4	2.66	0.002119	0.121
	FALSE	High	FEELCSDLFR	1xCarbamidomethyl [C5]	0.0365444	0.00152962	2	3	1	P17066; P0DMV9	0	1315.6	High	0.0007925	0.03367	2.92
		Checked	Confidence	Identifying Node	PSM Ambiguity	Annotated Sequence	Modifications	# Protein Groups	# Proteins	Master Protein Accessions	Protein Accessions	# Missed Cleavages	Charge	DeltaScore	DeltaCn	Rank	Search Engine Rank	m/z [Da]	MH+ [Da]	Theo. MH+ [Da]	DeltaM [ppm]	Deltam/z [Da]	Activation Type	MS Order	Isolation Interference [%]	Ion Inject Time [ms]	RT [min]	First Scan	Spectrum File	File ID	XCorr	Percolator q-Value	Percolator PEP
		FALSE	High	Sequest HT (A2)	Unambiguous	FEELcSDLFR	C5(Carbamidomethyl)	2	3	P17066; P0DMV9	P48741; P17066; P0DMV9	0	2	0.7123	0	1	1	658.3	1315.59	1315.6	-4.94	-0.00325	HCD (High Energy Collision Dissociation)	MS2	56.8949	5.884	35.6403	38539	WQR_1_20190806.raw	F4	2.92	0.0007925	0.03367
	FALSE	High	LSKEEIER		0.104762	0.00267473	2	2	1	P0DMV9; P34931	1	1003.54	High	0.001475	0.1004	2.47
		Checked	Confidence	Identifying Node	PSM Ambiguity	Annotated Sequence	Modifications	# Protein Groups	# Proteins	Master Protein Accessions	Protein Accessions	# Missed Cleavages	Charge	DeltaScore	DeltaCn	Rank	Search Engine Rank	m/z [Da]	MH+ [Da]	Theo. MH+ [Da]	DeltaM [ppm]	Deltam/z [Da]	Activation Type	MS Order	Isolation Interference [%]	Ion Inject Time [ms]	RT [min]	First Scan	Spectrum File	File ID	XCorr	Percolator q-Value	Percolator PEP
		FALSE	High	Sequest HT (A2)	Unambiguous	LSKEEIER		2	2	P0DMV9; P34931	P0DMV9; P34931	1	2	0.5263	0	1	1	502.275	1003.54	1003.54	0.07	3e-05	HCD (High Energy Collision Dissociation)	MS2	0	36.235	9.0477	6624	WQR_1_20190806.raw	F4	2.47	0.001475	0.1004
	FALSE	High	SAVEDEGLK		0.14046	0.00267473	1	1	1	P0DMV9	0	947.468	High	0.002119	0.1358	1.51
		Checked	Confidence	Identifying Node	PSM Ambiguity	Annotated Sequence	Modifications	# Protein Groups	# Proteins	Master Protein Accessions	Protein Accessions	# Missed Cleavages	Charge	DeltaScore	DeltaCn	Rank	Search Engine Rank	m/z [Da]	MH+ [Da]	Theo. MH+ [Da]	DeltaM [ppm]	Deltam/z [Da]	Activation Type	MS Order	Isolation Interference [%]	Ion Inject Time [ms]	RT [min]	First Scan	Spectrum File	File ID	XCorr	Percolator q-Value	Percolator PEP
		FALSE	High	Sequest HT (A2)	Unambiguous	SAVEDEGLK		1	1	P0DMV9	P0DMV9	0	2	0.4305	0	1	1	474.239	947.47	947.468	1.92	0.00091	HCD (High Energy Collision Dissociation)	MS2	83.6833	16.06	9.801	7508	WQR_1_20190806.raw	F4	1.51	0.002119	0.1358
	FALSE	High	LLQDFFNGR		0.171203	0.00381703	1	1	1	P0DMV9	0	1109.57	High	0.002731	0.1664	2.41
		Checked	Confidence	Identifying Node	PSM Ambiguity	Annotated Sequence	Modifications	# Protein Groups	# Proteins	Master Protein Accessions	Protein Accessions	# Missed Cleavages	Charge	DeltaScore	DeltaCn	Rank	Search Engine Rank	m/z [Da]	MH+ [Da]	Theo. MH+ [Da]	DeltaM [ppm]	Deltam/z [Da]	Activation Type	MS Order	Isolation Interference [%]	Ion Inject Time [ms]	RT [min]	First Scan	Spectrum File	File ID	XCorr	Percolator q-Value	Percolator PEP
		FALSE	High	Sequest HT (A2)	Unambiguous	LLQDFFNGR		1	1	P0DMV9	P0DMV9	0	2	0.556	0	1	1	555.292	1109.58	1109.57	1.94	0.00108	HCD (High Energy Collision Dissociation)	MS2	7.93842	9.435	34.59	37259	WQR_1_20190806.raw	F4	2.41	0.002731	0.1664
	FALSE	High	STLEPVEK		0.251334	0.00816598	2	3	1	P17066; P0DMV9	0	902.483	High	0.005146	0.2463	1.55
		Checked	Confidence	Identifying Node	PSM Ambiguity	Annotated Sequence	Modifications	# Protein Groups	# Proteins	Master Protein Accessions	Protein Accessions	# Missed Cleavages	Charge	DeltaScore	DeltaCn	Rank	Search Engine Rank	m/z [Da]	MH+ [Da]	Theo. MH+ [Da]	DeltaM [ppm]	Deltam/z [Da]	Activation Type	MS Order	Isolation Interference [%]	Ion Inject Time [ms]	RT [min]	First Scan	Spectrum File	File ID	XCorr	Percolator q-Value	Percolator PEP
		FALSE	High	Sequest HT (A2)	Unambiguous	STLEPVEK		2	3	P17066; P0DMV9	P48741; P17066; P0DMV9	0	2	0.3677	0	1	1	451.744	902.482	902.483	-1.47	-0.00066	HCD (High Energy Collision Dissociation)	MS2	50.2474	4.552	11.4155	9362	WQR_1_20190806.raw	F4	1.55	0.005146	0.2463
FALSE	High	Master Protein	P11142	Heat shock cognate 71 kDa protein OS=Homo sapiens OX=9606 GN=HSPA8 PE=1 SV=1	0	110.339	49	29	91	25	1	646	70.9	5.52	351.03	29
	Checked	Confidence	Sequence	Modifications	Qvality PEP	Qvality q-value	# Protein Groups	# Proteins	# PSMs	Master Protein Accessions	# Missed Cleavages	Theo. MH+ [Da]	Confidence (by Search Engine): Sequest HT	Percolator q-Value (by Search Engine): Sequest HT	Percolator PEP (by Search Engine): Sequest HT	XCorr (by Search Engine): Sequest HT
	FALSE	High	TTPSYVAFTDTER		0.00386804	0	4	6	2	P17066; P11142; P0DMV9; P34931	0	1487.7	High	0	0.00746	3.18
		Checked	Confidence	Identifying Node	PSM Ambiguity	Annotated Sequence	Modifications	# Protein Groups	# Proteins	Master Protein Accessions	Protein Accessions	# Missed Cleavages	Charge	DeltaScore	DeltaCn	Rank	Search Engine Rank	m/z [Da]	MH+ [Da]	Theo. MH+ [Da]	DeltaM [ppm]	Deltam/z [Da]	Activation Type	MS Order	Isolation Interference [%]	Ion Inject Time [ms]	RT [min]	First Scan	Spectrum File	File ID	XCorr	Percolator q-Value	Percolator PEP
		FALSE	High	Sequest HT (A2)	Unambiguous	TTPSYVAFTDTER		4	6	P17066; P11142; P0DMV9; P34931	P48741; P17066; P54652; P11142; P0DMV9; P34931	0	3	0.6447	0	1	1	496.572	1487.7	1487.7	-0.26	-0.00013	HCD (High Energy Collision Dissociation)	MS2	59.7366	45	25.5014	26041	WQR_1_20190806.raw	F4	3.18	0	0.00746
		FALSE	High	Sequest HT (A2)	Unambiguous	TTPSYVAFTDTER		4	6	P17066; P11142; P0DMV9; P34931	P48741; P17066; P54652; P11142; P0DMV9; P34931	0	2	0.5845	0	1	1	744.355	1487.7	1487.7	0.87	0.00065	HCD (High Energy Collision Dissociation)	MS2	17.1152	6.115	25.4211	25944	WQR_1_20190806.raw	F4	2.84	0	0.003252
	FALSE	High	TVTNAVVTVPAYFNDSQR		9.44289e-05	0	1	1	2	P11142	0	1982	High	0	6.815e-05	4.24
		Checked	Confidence	Identifying Node	PSM Ambiguity	Annotated Sequence	Modifications	# Protein Groups	# Proteins	Master Protein Accessions	Protein Accessions	# Missed Cleavages	Charge	DeltaScore	DeltaCn	Rank	Search Engine Rank	m/z [Da]	MH+ [Da]	Theo. MH+ [Da]	DeltaM [ppm]	Deltam/z [Da]	Activation Type	MS Order	Isolation Interference [%]	Ion Inject Time [ms]	RT [min]	First Scan	Spectrum File	File ID	XCorr	Percolator q-Value	Percolator PEP
		FALSE	High	Sequest HT (A2)	Unambiguous	TVTNAVVTVPAYFNDSQR		1	1	P11142	P11142	0	2	0.6462	0	1	1	991.508	1982.01	1982	5.02	0.00498	HCD (High Energy Collision Dissociation)	MS2	0	45	33.9673	36475	WQR_1_20190806.raw	F4	4.24	0	6.815e-05
		FALSE	High	Sequest HT (A2)	Unambiguous	TVTNAVVTVPAYFNDSQR		1	1	P11142	P11142	0	3	0.5698	0	1	1	661.339	1982	1982	1.88	0.00124	HCD (High Energy Collision Dissociation)	MS2	34.4926	22.812	33.9359	36440	WQR_1_20190806.raw	F4	3.44	0.001475	0.1074
	FALSE	High	LDKSQIHDIVLVGGSTR		0.000118721	0	1	1	4	P11142	1	1838.01	High	0	8.653e-05	5.9
		Checked	Confidence	Identifying Node	PSM Ambiguity	Annotated Sequence	Modifications	# Protein Groups	# Proteins	Master Protein Accessions	Protein Accessions	# Missed Cleavages	Charge	DeltaScore	DeltaCn	Rank	Search Engine Rank	m/z [Da]	MH+ [Da]	Theo. MH+ [Da]	DeltaM [ppm]	Deltam/z [Da]	Activation Type	MS Order	Isolation Interference [%]	Ion Inject Time [ms]	RT [min]	First Scan	Spectrum File	File ID	XCorr	Percolator q-Value	Percolator PEP
		FALSE	High	Sequest HT (A2)	Unambiguous	LDKSQIHDIVLVGGSTR		1	1	P11142	P11142	1	2	0.7837	0	1	1	919.514	1838.02	1838.01	3.76	0.00345	HCD (High Energy Collision Dissociation)	MS2	0	38.202	24.7283	25118	WQR_1_20190806.raw	F4	4.67	0	0.0003908
		FALSE	High	Sequest HT (A2)	Unambiguous	LDKSQIHDIVLVGGSTR		1	1	P11142	P11142	1	3	0.7529	0	1	1	613.343	1838.01	1838.01	0.9	0.00055	HCD (High Energy Collision Dissociation)	MS2	2.99058	3.037	24.7245	25113	WQR_1_20190806.raw	F4	5.26	0	0.0008481
		FALSE	High	Sequest HT (A2)	Unambiguous	LDKSQIHDIVLVGGSTR		1	1	P11142	P11142	1	3	0.7683	0	1	1	613.342	1838.01	1838.01	-0.7	-0.00043	HCD (High Energy Collision Dissociation)	MS2	20.2287	35.816	24.6419	25009	WQR_1_20190806.raw	F4	5.87	0	9.64e-05
		FALSE	High	Sequest HT (A2)	Unambiguous	LDKSQIHDIVLVGGSTR		1	1	P11142	P11142	1	3	0.7627	0	1	1	613.343	1838.02	1838.01	1.09	0.00067	HCD (High Energy Collision Dissociation)	MS2	0	8.364	24.651	25019	WQR_1_20190806.raw	F4	5.9	0	8.653e-05
	FALSE	High	IINEPTAAAIAYGLDKK		0.000192496	0	1	2	9	P11142	1	1787.99	High	0	0.0004547	5.92
		Checked	Confidence	Identifying Node	PSM Ambiguity	Annotated Sequence	Modifications	# Protein Groups	# Proteins	Master Protein Accessions	Protein Accessions	# Missed Cleavages	Charge	DeltaScore	DeltaCn	Rank	Search Engine Rank	m/z [Da]	MH+ [Da]	Theo. MH+ [Da]	DeltaM [ppm]	Deltam/z [Da]	Activation Type	MS Order	Isolation Interference [%]	Ion Inject Time [ms]	RT [min]	First Scan	Spectrum File	File ID	XCorr	Percolator q-Value	Percolator PEP
		FALSE	High	Sequest HT (A2)	Unambiguous	IINEPTAAAIAYGLDKK		1	2	P11142	P54652; P11142	1	3	0.797	0	1	1	596.669	1787.99	1787.99	1.49	0.00089	HCD (High Energy Collision Dissociation)	MS2	3.25917	4.812	31.4615	33379	WQR_1_20190806.raw	F4	5.37	0	0.0004056
		FALSE	High	Sequest HT (A2)	Unambiguous	IINEPTAAAIAYGLDKK		1	2	P11142	P54652; P11142	1	3	0.7949	0	1	1	596.669	1787.99	1787.99	1.49	0.00089	HCD (High Energy Collision Dissociation)	MS2	3.04	5.184	31.4621	33380	WQR_1_20190806.raw	F4	5.9	0	0.0001434
		FALSE	High	Sequest HT (A2)	Unambiguous	IINEPTAAAIAYGLDKK		1	2	P11142	P54652; P11142	1	3	0.7939	0	1	1	596.669	1787.99	1787.99	1.49	0.00089	HCD (High Energy Collision Dissociation)	MS2	2.96229	5.414	31.4647	33384	WQR_1_20190806.raw	F4	5.92	0	0.0004547
		FALSE	High	Sequest HT (A2)	Unambiguous	IINEPTAAAIAYGLDKK		1	2	P11142	P54652; P11142	1	3	0.7919	0	1	1	596.669	1787.99	1787.99	1.18	0.0007	HCD (High Energy Collision Dissociation)	MS2	4.27098	2.542	31.4828	33407	WQR_1_20190806.raw	F4	5.43	0	0.001035
		FALSE	High	Sequest HT (A2)	Unambiguous	IINEPTAAAIAYGLDKK		1	2	P11142	P54652; P11142	1	2	0.7842	0	1	1	894.5	1787.99	1787.99	1.36	0.00121	HCD (High Energy Collision Dissociation)	MS2	0	7.696	31.4876	33412	WQR_1_20190806.raw	F4	5.05	0	0.0002512
		FALSE	High	Sequest HT (A2)	Unambiguous	IINEPTAAAIAYGLDKK		1	2	P11142	P54652; P11142	1	2	0.7723	0	1	1	894.5	1787.99	1787.99	1.36	0.00121	HCD (High Energy Collision Dissociation)	MS2	0	13.585	31.4949	33422	WQR_1_20190806.raw	F4	4.7	0	0.0003941
		FALSE	High	Sequest HT (A2)	Unambiguous	IINEPTAAAIAYGLDKK		1	2	P11142	P54652; P11142	1	3	0.7087	0	1	1	596.669	1787.99	1787.99	1.18	0.0007	HCD (High Energy Collision Dissociation)	MS2	0	2.355	31.497	33425	WQR_1_20190806.raw	F4	4.36	0	0.002224
		FALSE	High	Sequest HT (A2)	Unambiguous	IINEPTAAAIAYGLDKK		1	2	P11142	P54652; P11142	1	2	0.74	0	1	1	894.5	1787.99	1787.99	1.02	0.00091	HCD (High Energy Collision Dissociation)	MS2	0	13.582	31.544	33483	WQR_1_20190806.raw	F4	4	0	0.002559
		FALSE	High	Sequest HT (A2)	Unambiguous	IINEPTAAAIAYGLDKK		1	2	P11142	P54652; P11142	1	2	0.7816	0	1	1	894.5	1787.99	1787.99	1.36	0.00121	HCD (High Energy Collision Dissociation)	MS2	0	39.241	31.487	33411	WQR_1_20190806.raw	F4	5.22	0	0.0001515
	FALSE	High	IINEPTAAAIAYGLDK		0.000579593	0	3	4	7	P11142; P11021; P34931	0	1659.9	High	0	0.0004507	4.31
		Checked	Confidence	Identifying Node	PSM Ambiguity	Annotated Sequence	Modifications	# Protein Groups	# Proteins	Master Protein Accessions	Protein Accessions	# Missed Cleavages	Charge	DeltaScore	DeltaCn	Rank	Search Engine Rank	m/z [Da]	MH+ [Da]	Theo. MH+ [Da]	DeltaM [ppm]	Deltam/z [Da]	Activation Type	MS Order	Isolation Interference [%]	Ion Inject Time [ms]	RT [min]	First Scan	Spectrum File	File ID	XCorr	Percolator q-Value	Percolator PEP
		FALSE	High	Sequest HT (A2)	Unambiguous	IINEPTAAAIAYGLDK		3	4	P11142; P11021; P34931	P54652; P11142; P11021; P34931	0	2	0.6939	0	1	1	830.452	1659.9	1659.9	1.24	0.00103	HCD (High Energy Collision Dissociation)	MS2	17.5906	44.542	35.6121	38509	WQR_1_20190806.raw	F4	3.79	0	0.000612
		FALSE	High	Sequest HT (A2)	Unambiguous	IINEPTAAAIAYGLDK		3	4	P11142; P11021; P34931	P54652; P11142; P11021; P34931	0	2	0.7425	0	1	1	830.451	1659.89	1659.9	-0.23	-0.00019	HCD (High Energy Collision Dissociation)	MS2	16.5862	9.996	35.6192	38517	WQR_1_20190806.raw	F4	4.31	0	0.0004507
		FALSE	High	Sequest HT (A2)	Unambiguous	IINEPTAAAIAYGLDK		3	4	P11142; P11021; P34931	P54652; P11142; P11021; P34931	0	2	0.7022	0	1	1	830.452	1659.9	1659.9	1.16	0.00096	HCD (High Energy Collision Dissociation)	MS2	0	18.179	35.6461	38546	WQR_1_20190806.raw	F4	4.03	0	0.00159
		FALSE	High	Sequest HT (A2)	Unambiguous	IINEPTAAAIAYGLDK		3	4	P11142; P11021; P34931	P54652; P11142; P11021; P34931	0	2	0.6851	0	1	1	830.452	1659.9	1659.9	0.5	0.00042	HCD (High Energy Collision Dissociation)	MS2	8.18437	9.657	35.6838	38592	WQR_1_20190806.raw	F4	3.62	0	0.003142
		FALSE	High	Sequest HT (A2)	Unambiguous	IINEPTAAAIAYGLDK		3	4	P11142; P11021; P34931	P54652; P11142; P11021; P34931	0	3	0.5141	0	1	1	553.97	1659.89	1659.9	-0.35	-0.0002	HCD (High Energy Collision Dissociation)	MS2	13.2055	17.672	35.6878	38597	WQR_1_20190806.raw	F4	3.89	0	0.01924
		FALSE	High	Sequest HT (A2)	Unambiguous	IINEPTAAAIAYGLDK		3	4	P11142; P11021; P34931	P54652; P11142; P11021; P34931	0	3	0.518	0	1	1	553.971	1659.9	1659.9	2.07	0.00115	HCD (High Energy Collision Dissociation)	MS2	10.6604	19.177	35.7212	38634	WQR_1_20190806.raw	F4	3.88	0	0.002043
		FALSE	High	Sequest HT (A2)	Unambiguous	IINEPTAAAIAYGLDK		3	4	P11142; P11021; P34931	P54652; P11142; P11021; P34931	0	3	0.5364	0	1	1	553.971	1659.9	1659.9	2.18	0.00121	HCD (High Energy Collision Dissociation)	MS2	6.20173	5.205	35.7336	38649	WQR_1_20190806.raw	F4	1.51	0	0.0117
	FALSE	High	ILDKCNEIINWLDK	1xCarbamidomethyl [C5]	0.00458155	0	1	1	2	P11142	1	1773.92	High	0	0.003893	4.59
		Checked	Confidence	Identifying Node	PSM Ambiguity	Annotated Sequence	Modifications	# Protein Groups	# Proteins	Master Protein Accessions	Protein Accessions	# Missed Cleavages	Charge	DeltaScore	DeltaCn	Rank	Search Engine Rank	m/z [Da]	MH+ [Da]	Theo. MH+ [Da]	DeltaM [ppm]	Deltam/z [Da]	Activation Type	MS Order	Isolation Interference [%]	Ion Inject Time [ms]	RT [min]	First Scan	Spectrum File	File ID	XCorr	Percolator q-Value	Percolator PEP
		FALSE	High	Sequest HT (A2)	Unambiguous	ILDKcNEIINWLDK	C5(Carbamidomethyl)	1	1	P11142	P11142	1	3	0.6383	0	1	1	591.979	1773.92	1773.92	0.55	0.00033	HCD (High Energy Collision Dissociation)	MS2	28.6197	25.273	39.0543	42579	WQR_1_20190806.raw	F4	4.59	0	0.003893
		FALSE	High	Sequest HT (A2)	Unambiguous	ILDKcNEIINWLDK	C5(Carbamidomethyl)	1	1	P11142	P11142	1	3	0.682	0	1	1	591.979	1773.92	1773.92	0.65	0.00039	HCD (High Energy Collision Dissociation)	MS2	6.77904	4.657	39.1314	42670	WQR_1_20190806.raw	F4	4.12	0	0.004075
	FALSE	High	SFYPEEVSSMVLTK		0.00253284	0	1	1	9	P11142	0	1616.79	High	0	0.01787	3.34
		Checked	Confidence	Identifying Node	PSM Ambiguity	Annotated Sequence	Modifications	# Protein Groups	# Proteins	Master Protein Accessions	Protein Accessions	# Missed Cleavages	Charge	DeltaScore	DeltaCn	Rank	Search Engine Rank	m/z [Da]	MH+ [Da]	Theo. MH+ [Da]	DeltaM [ppm]	Deltam/z [Da]	Activation Type	MS Order	Isolation Interference [%]	Ion Inject Time [ms]	RT [min]	First Scan	Spectrum File	File ID	XCorr	Percolator q-Value	Percolator PEP
		FALSE	High	Sequest HT (A2)	Unambiguous	SFYPEEVSSMVLTK		1	1	P11142	P11142	0	2	0.6166	0	1	1	808.899	1616.79	1616.79	1.44	0.00116	HCD (High Energy Collision Dissociation)	MS2	33.0993	4.136	40.0012	43703	WQR_1_20190806.raw	F4	1.93	0	0.01875
		FALSE	High	Sequest HT (A2)	Unambiguous	SFYPEEVSSMVLTK		1	1	P11142	P11142	0	2	0.7094	0	1	1	808.899	1616.79	1616.79	1.44	0.00116	HCD (High Energy Collision Dissociation)	MS2	37.5889	2.886	39.9956	43695	WQR_1_20190806.raw	F4	2.34	0	0.002123
		FALSE	High	Sequest HT (A2)	Unambiguous	SFYPEEVSSMVLTK		1	1	P11142	P11142	0	2	0.6983	0	1	1	808.899	1616.79	1616.79	1.44	0.00116	HCD (High Energy Collision Dissociation)	MS2	37.0258	3.661	39.9896	43687	WQR_1_20190806.raw	F4	2.42	0	0.00592
		FALSE	High	Sequest HT (A2)	Unambiguous	SFYPEEVSSMVLTK		1	1	P11142	P11142	0	3	0.725	0	1	1	539.601	1616.79	1616.79	0.3	0.00016	HCD (High Energy Collision Dissociation)	MS2	11.6434	14.152	39.807	43472	WQR_1_20190806.raw	F4	3.2	0	0.0141
		FALSE	High	Sequest HT (A2)	Unambiguous	SFYPEEVSSMVLTK		1	1	P11142	P11142	0	2	0.5419	0	1	1	808.898	1616.79	1616.79	0.99	0.0008	HCD (High Energy Collision Dissociation)	MS2	19.7889	21.812	39.6097	43239	WQR_1_20190806.raw	F4	2.03	0	0.007659
		FALSE	High	Sequest HT (A2)	Unambiguous	SFYPEEVSSMVLTK		1	1	P11142	P11142	0	2	0.6971	0	1	1	808.9	1616.79	1616.79	2.57	0.00208	HCD (High Energy Collision Dissociation)	MS2	12.5644	16.195	39.5739	43197	WQR_1_20190806.raw	F4	2.74	0	0.01038
		FALSE	High	Sequest HT (A2)	Unambiguous	SFYPEEVSSMVLTK		1	1	P11142	P11142	0	2	0.7291	0	1	1	808.9	1616.79	1616.79	2.57	0.00208	HCD (High Energy Collision Dissociation)	MS2	9.04645	8.439	39.5717	43194	WQR_1_20190806.raw	F4	2.99	0	0.002092
		FALSE	High	Sequest HT (A2)	Unambiguous	SFYPEEVSSMVLTK		1	1	P11142	P11142	0	2	0.6667	0	1	1	808.901	1616.8	1616.79	4.69	0.00379	HCD (High Energy Collision Dissociation)	MS2	31.3786	16.596	39.5262	43144	WQR_1_20190806.raw	F4	2.58	0	0.008447
		FALSE	High	Sequest HT (A2)	Unambiguous	SFYPEEVSSMVLTK		1	1	P11142	P11142	0	3	0.7485	0	1	1	539.601	1616.79	1616.79	0.75	0.00041	HCD (High Energy Collision Dissociation)	MS2	10.9191	10.56	39.792	43454	WQR_1_20190806.raw	F4	3.34	0	0.01787
	FALSE	High	RFDDAVVQSDMK		0.000263431	0	1	1	2	P11142	1	1410.67	High	0	0.0001983	4.61
		Checked	Confidence	Identifying Node	PSM Ambiguity	Annotated Sequence	Modifications	# Protein Groups	# Proteins	Master Protein Accessions	Protein Accessions	# Missed Cleavages	Charge	DeltaScore	DeltaCn	Rank	Search Engine Rank	m/z [Da]	MH+ [Da]	Theo. MH+ [Da]	DeltaM [ppm]	Deltam/z [Da]	Activation Type	MS Order	Isolation Interference [%]	Ion Inject Time [ms]	RT [min]	First Scan	Spectrum File	File ID	XCorr	Percolator q-Value	Percolator PEP
		FALSE	High	Sequest HT (A2)	Unambiguous	RFDDAVVQSDMK		1	1	P11142	P11142	1	2	0.551	0	1	1	705.838	1410.67	1410.67	-0.04	-3e-05	HCD (High Energy Collision Dissociation)	MS2	53.6556	45	18.218	17274	WQR_1_20190806.raw	F4	4.61	0	0.0001983
		FALSE	High	Sequest HT (A2)	Unambiguous	RFDDAVVQSDMK		1	1	P11142	P11142	1	3	0.653	0	1	1	470.893	1410.66	1410.67	-2.45	-0.00115	HCD (High Energy Collision Dissociation)	MS2	46.2627	45	18.2148	17270	WQR_1_20190806.raw	F4	3.66	0.0007925	0.05142
	FALSE	High	QTQTFTTYSDNQPGVLIQVYEGER		0.0019151	0	1	1	3	P11142	0	2774.33	High	0	0.001568	4.62
		Checked	Confidence	Identifying Node	PSM Ambiguity	Annotated Sequence	Modifications	# Protein Groups	# Proteins	Master Protein Accessions	Protein Accessions	# Missed Cleavages	Charge	DeltaScore	DeltaCn	Rank	Search Engine Rank	m/z [Da]	MH+ [Da]	Theo. MH+ [Da]	DeltaM [ppm]	Deltam/z [Da]	Activation Type	MS Order	Isolation Interference [%]	Ion Inject Time [ms]	RT [min]	First Scan	Spectrum File	File ID	XCorr	Percolator q-Value	Percolator PEP
		FALSE	High	Sequest HT (A2)	Unambiguous	QTQTFTTYSDNQPGVLIQVYEGER		1	1	P11142	P11142	0	3	0.6553	0	1	1	925.448	2774.33	2774.33	0.7	0.00064	HCD (High Energy Collision Dissociation)	MS2	4.21961	7.218	40.6404	44478	WQR_1_20190806.raw	F4	4.38	0	0.009158
		FALSE	High	Sequest HT (A2)	Unambiguous	QTQTFTTYSDNQPGVLIQVYEGER		1	1	P11142	P11142	0	3	0.7424	0	1	1	925.448	2774.33	2774.33	0.7	0.00064	HCD (High Energy Collision Dissociation)	MS2	0	7.107	40.6393	44476	WQR_1_20190806.raw	F4	4.62	0	0.001568
		FALSE	High	Sequest HT (A2)	Unambiguous	QTQTFTTYSDNQPGVLIQVYEGER		1	1	P11142	P11142	0	3	0.7393	0	1	1	925.449	2774.33	2774.33	2.15	0.00199	HCD (High Energy Collision Dissociation)	MS2	4.11565	12.929	40.5185	44319	WQR_1_20190806.raw	F4	4.45	0	0.001639
	FALSE	High	SQIHDIVLVGGSTR		0.00648139	0	1	1	1	P11142	0	1481.81	High	0	0.005568	4.29
		Checked	Confidence	Identifying Node	PSM Ambiguity	Annotated Sequence	Modifications	# Protein Groups	# Proteins	Master Protein Accessions	Protein Accessions	# Missed Cleavages	Charge	DeltaScore	DeltaCn	Rank	Search Engine Rank	m/z [Da]	MH+ [Da]	Theo. MH+ [Da]	DeltaM [ppm]	Deltam/z [Da]	Activation Type	MS Order	Isolation Interference [%]	Ion Inject Time [ms]	RT [min]	First Scan	Spectrum File	File ID	XCorr	Percolator q-Value	Percolator PEP
		FALSE	High	Sequest HT (A2)	Unambiguous	SQIHDIVLVGGSTR		1	1	P11142	P11142	0	2	0.7343	0	1	1	741.408	1481.81	1481.81	1.47	0.00109	HCD (High Energy Collision Dissociation)	MS2	47.752	45	22.0451	21835	WQR_1_20190806.raw	F4	4.29	0	0.005568
	FALSE	High	STAGDTHLGGEDFDNR		0.000273676	0	1	2	5	P11142	0	1691.73	High	0	0.0002061	4
		Checked	Confidence	Identifying Node	PSM Ambiguity	Annotated Sequence	Modifications	# Protein Groups	# Proteins	Master Protein Accessions	Protein Accessions	# Missed Cleavages	Charge	DeltaScore	DeltaCn	Rank	Search Engine Rank	m/z [Da]	MH+ [Da]	Theo. MH+ [Da]	DeltaM [ppm]	Deltam/z [Da]	Activation Type	MS Order	Isolation Interference [%]	Ion Inject Time [ms]	RT [min]	First Scan	Spectrum File	File ID	XCorr	Percolator q-Value	Percolator PEP
		FALSE	High	Sequest HT (A2)	Unambiguous	STAGDTHLGGEDFDNR		1	2	P11142	P54652; P11142	0	3	0.4673	0	1	1	564.58	1691.73	1691.73	0.38	0.00022	HCD (High Energy Collision Dissociation)	MS2	25.4189	45	15.0553	13632	WQR_1_20190806.raw	F4	3.06	0	0.0227
		FALSE	High	Sequest HT (A2)	Unambiguous	STAGDTHLGGEDFDNR		1	2	P11142	P54652; P11142	0	3	0.6148	0	1	1	564.581	1691.73	1691.73	0.82	0.00046	HCD (High Energy Collision Dissociation)	MS2	76.3952	44.144	15.2716	13875	WQR_1_20190806.raw	F4	3.79	0	0.001588
		FALSE	High	Sequest HT (A2)	Unambiguous	STAGDTHLGGEDFDNR		1	2	P11142	P54652; P11142	0	3	0.6445	0	1	1	564.581	1691.73	1691.73	0.93	0.00052	HCD (High Energy Collision Dissociation)	MS2	3.68167	2.524	15.304	13913	WQR_1_20190806.raw	F4	3.46	0	0.009445
		FALSE	High	Sequest HT (A2)	Unambiguous	STAGDTHLGGEDFDNR		1	2	P11142	P54652; P11142	0	3	0.6656	0	1	1	564.581	1691.73	1691.73	0.93	0.00052	HCD (High Energy Collision Dissociation)	MS2	2.71025	4.515	15.3052	13915	WQR_1_20190806.raw	F4	3.05	0	0.01132
		FALSE	High	Sequest HT (A2)	Unambiguous	STAGDTHLGGEDFDNR		1	2	P11142	P54652; P11142	0	2	0.77	0	1	1	846.368	1691.73	1691.73	2.12	0.0018	HCD (High Energy Collision Dissociation)	MS2	0	3.41	15.3298	13942	WQR_1_20190806.raw	F4	4	0	0.0002061
	FALSE	High	SINPDEAVAYGAAVQAAILSGDK		0.00030043	0	1	1	1	P11142	0	2260.15	High	0	0.0002273	5.49
		Checked	Confidence	Identifying Node	PSM Ambiguity	Annotated Sequence	Modifications	# Protein Groups	# Proteins	Master Protein Accessions	Protein Accessions	# Missed Cleavages	Charge	DeltaScore	DeltaCn	Rank	Search Engine Rank	m/z [Da]	MH+ [Da]	Theo. MH+ [Da]	DeltaM [ppm]	Deltam/z [Da]	Activation Type	MS Order	Isolation Interference [%]	Ion Inject Time [ms]	RT [min]	First Scan	Spectrum File	File ID	XCorr	Percolator q-Value	Percolator PEP
		FALSE	High	Sequest HT (A2)	Unambiguous	SINPDEAVAYGAAVQAAILSGDK		1	1	P11142	P11142	0	3	0.7632	0	1	1	754.055	2260.15	2260.15	2.23	0.00168	HCD (High Energy Collision Dissociation)	MS2	12.1517	30.842	51.4153	56837	WQR_1_20190806.raw	F4	5.49	0	0.0002273
	FALSE	High	MVNHFIAEFKR		0.00593054	0	1	1	1	P11142	1	1391.73	High	0	0.005089	4.4
		Checked	Confidence	Identifying Node	PSM Ambiguity	Annotated Sequence	Modifications	# Protein Groups	# Proteins	Master Protein Accessions	Protein Accessions	# Missed Cleavages	Charge	DeltaScore	DeltaCn	Rank	Search Engine Rank	m/z [Da]	MH+ [Da]	Theo. MH+ [Da]	DeltaM [ppm]	Deltam/z [Da]	Activation Type	MS Order	Isolation Interference [%]	Ion Inject Time [ms]	RT [min]	First Scan	Spectrum File	File ID	XCorr	Percolator q-Value	Percolator PEP
		FALSE	High	Sequest HT (A2)	Unambiguous	MVNHFIAEFKR		1	1	P11142	P11142	1	3	0.7409	0	1	1	464.581	1391.73	1391.73	2.48	0.00115	HCD (High Energy Collision Dissociation)	MS2	32.1924	10.69	21.833	21578	WQR_1_20190806.raw	F4	4.4	0	0.005089
	FALSE	High	MVNHFIAEFK	1xOxidation [M1]	0.00359947	0	1	1	1	P11142	0	1251.62	High	0	0.00302	4.2
		Checked	Confidence	Identifying Node	PSM Ambiguity	Annotated Sequence	Modifications	# Protein Groups	# Proteins	Master Protein Accessions	Protein Accessions	# Missed Cleavages	Charge	DeltaScore	DeltaCn	Rank	Search Engine Rank	m/z [Da]	MH+ [Da]	Theo. MH+ [Da]	DeltaM [ppm]	Deltam/z [Da]	Activation Type	MS Order	Isolation Interference [%]	Ion Inject Time [ms]	RT [min]	First Scan	Spectrum File	File ID	XCorr	Percolator q-Value	Percolator PEP
		FALSE	High	Sequest HT (A2)	Unambiguous	mVNHFIAEFK	M1(Oxidation)	1	1	P11142	P11142	0	2	0.6167	0	1	1	626.315	1251.62	1251.62	2.54	0.00159	HCD (High Energy Collision Dissociation)	MS2	8.17303	16.631	23.1694	23214	WQR_1_20190806.raw	F4	4.2	0	0.00302
	FALSE	High	MVNHFIAEFK		0.00714345	0	1	1	1	P11142	0	1235.62	High	0	0.006176	4.04
		Checked	Confidence	Identifying Node	PSM Ambiguity	Annotated Sequence	Modifications	# Protein Groups	# Proteins	Master Protein Accessions	Protein Accessions	# Missed Cleavages	Charge	DeltaScore	DeltaCn	Rank	Search Engine Rank	m/z [Da]	MH+ [Da]	Theo. MH+ [Da]	DeltaM [ppm]	Deltam/z [Da]	Activation Type	MS Order	Isolation Interference [%]	Ion Inject Time [ms]	RT [min]	First Scan	Spectrum File	File ID	XCorr	Percolator q-Value	Percolator PEP
		FALSE	High	Sequest HT (A2)	Unambiguous	MVNHFIAEFK		1	1	P11142	P11142	0	2	0.7153	0	1	1	618.316	1235.63	1235.62	1.13	0.0007	HCD (High Energy Collision Dissociation)	MS2	0	4.585	25.9252	26553	WQR_1_20190806.raw	F4	4.04	0	0.006176
	FALSE	High	NQTAEKEEFEHQQK		0.00176699	0	1	1	1	P11142	1	1745.81	High	0	0.001438	4.2
		Checked	Confidence	Identifying Node	PSM Ambiguity	Annotated Sequence	Modifications	# Protein Groups	# Proteins	Master Protein Accessions	Protein Accessions	# Missed Cleavages	Charge	DeltaScore	DeltaCn	Rank	Search Engine Rank	m/z [Da]	MH+ [Da]	Theo. MH+ [Da]	DeltaM [ppm]	Deltam/z [Da]	Activation Type	MS Order	Isolation Interference [%]	Ion Inject Time [ms]	RT [min]	First Scan	Spectrum File	File ID	XCorr	Percolator q-Value	Percolator PEP
		FALSE	High	Sequest HT (A2)	Unambiguous	NQTAEKEEFEHQQK		1	1	P11142	P11142	1	3	0.6095	0	1	1	582.608	1745.81	1745.81	0.99	0.00058	HCD (High Energy Collision Dissociation)	MS2	12.395	2.773	8.1055	5490	WQR_1_20190806.raw	F4	4.2	0	0.001438
	FALSE	High	NQVAMNPTNTVFDAK		0.00151059	0	1	1	4	P11142	0	1649.8	High	0	0.002429	3.85
		Checked	Confidence	Identifying Node	PSM Ambiguity	Annotated Sequence	Modifications	# Protein Groups	# Proteins	Master Protein Accessions	Protein Accessions	# Missed Cleavages	Charge	DeltaScore	DeltaCn	Rank	Search Engine Rank	m/z [Da]	MH+ [Da]	Theo. MH+ [Da]	DeltaM [ppm]	Deltam/z [Da]	Activation Type	MS Order	Isolation Interference [%]	Ion Inject Time [ms]	RT [min]	First Scan	Spectrum File	File ID	XCorr	Percolator q-Value	Percolator PEP
		FALSE	High	Sequest HT (A2)	Unambiguous	NQVAMNPTNTVFDAK		1	1	P11142	P11142	0	2	0.8234	0	1	1	825.402	1649.8	1649.8	0.69	0.00057	HCD (High Energy Collision Dissociation)	MS2	3.63486	6.527	26.2057	26899	WQR_1_20190806.raw	F4	3.68	0	0.001221
		FALSE	High	Sequest HT (A2)	Unambiguous	NQVAMNPTNTVFDAK		1	1	P11142	P11142	0	2	0.7642	0	1	1	825.402	1649.8	1649.8	1.28	0.00105	HCD (High Energy Collision Dissociation)	MS2	0	5.214	26.2754	26990	WQR_1_20190806.raw	F4	3.69	0	0.007379
		FALSE	High	Sequest HT (A2)	Unambiguous	NQVAMNPTNTVFDAK		1	1	P11142	P11142	0	2	0.7447	0	1	1	825.402	1649.8	1649.8	1.28	0.00105	HCD (High Energy Collision Dissociation)	MS2	0	18.342	26.3394	27068	WQR_1_20190806.raw	F4	3.29	0	0.004063
		FALSE	High	Sequest HT (A2)	Unambiguous	NQVAMNPTNTVFDAK		1	1	P11142	P11142	0	2	0.8026	0	1	1	825.403	1649.8	1649.8	1.72	0.00142	HCD (High Energy Collision Dissociation)	MS2	11.0295	17.949	26.1788	26864	WQR_1_20190806.raw	F4	3.85	0	0.002429
	FALSE	High	NQVAMNPTNTVFDAK	1xOxidation [M5]	0.00093179	0	1	1	4	P11142	0	1665.79	High	0	0.0007382	3.52
		Checked	Confidence	Identifying Node	PSM Ambiguity	Annotated Sequence	Modifications	# Protein Groups	# Proteins	Master Protein Accessions	Protein Accessions	# Missed Cleavages	Charge	DeltaScore	DeltaCn	Rank	Search Engine Rank	m/z [Da]	MH+ [Da]	Theo. MH+ [Da]	DeltaM [ppm]	Deltam/z [Da]	Activation Type	MS Order	Isolation Interference [%]	Ion Inject Time [ms]	RT [min]	First Scan	Spectrum File	File ID	XCorr	Percolator q-Value	Percolator PEP
		FALSE	High	Sequest HT (A2)	Unambiguous	NQVAmNPTNTVFDAK	M5(Oxidation)	1	1	P11142	P11142	0	2	0.7472	0	1	1	833.398	1665.79	1665.79	-0.74	-0.00062	HCD (High Energy Collision Dissociation)	MS2	20.2321	6.602	20.9219	20475	WQR_1_20190806.raw	F4	3.52	0	0.0007382
		FALSE	High	Sequest HT (A2)	Unambiguous	NQVAmNPTNTVFDAK	M5(Oxidation)	1	1	P11142	P11142	0	2	0.7119	0	1	1	833.399	1665.79	1665.79	-0.01	0	HCD (High Energy Collision Dissociation)	MS2	0	9.276	20.9279	20482	WQR_1_20190806.raw	F4	3.02	0	0.008137
		FALSE	High	Sequest HT (A2)	Unambiguous	NQVAmNPTNTVFDAK	M5(Oxidation)	1	1	P11142	P11142	0	2	0.7081	0	1	1	833.399	1665.79	1665.79	0.43	0.00036	HCD (High Energy Collision Dissociation)	MS2	0	45	20.9902	20563	WQR_1_20190806.raw	F4	3.46	0	0.002717
		FALSE	High	Sequest HT (A2)	Unambiguous	NQVAmNPTNTVFDAK	M5(Oxidation)	1	1	P11142	P11142	0	2	0.632	0	1	1	833.399	1665.79	1665.79	0.87	0.00073	HCD (High Energy Collision Dissociation)	MS2	32.0227	45	20.8844	20424	WQR_1_20190806.raw	F4	2.5	0	0.005747
	FALSE	High	NSLESYAFNMK		0.00336373	0	1	1	1	P11142	0	1303.6	High	0	0.002816	3.65
		Checked	Confidence	Identifying Node	PSM Ambiguity	Annotated Sequence	Modifications	# Protein Groups	# Proteins	Master Protein Accessions	Protein Accessions	# Missed Cleavages	Charge	DeltaScore	DeltaCn	Rank	Search Engine Rank	m/z [Da]	MH+ [Da]	Theo. MH+ [Da]	DeltaM [ppm]	Deltam/z [Da]	Activation Type	MS Order	Isolation Interference [%]	Ion Inject Time [ms]	RT [min]	First Scan	Spectrum File	File ID	XCorr	Percolator q-Value	Percolator PEP
		FALSE	High	Sequest HT (A2)	Unambiguous	NSLESYAFNMK		1	1	P11142	P11142	0	2	0.7616	0	1	1	652.303	1303.6	1303.6	0.63	0.00041	HCD (High Energy Collision Dissociation)	MS2	10.6887	3.232	31.0052	32804	WQR_1_20190806.raw	F4	3.65	0	0.002816
	FALSE	High	FEELNADLFR		0.0157405	0	1	2	2	P11142	0	1253.62	High	0.0007925	0.03843	3.32
		Checked	Confidence	Identifying Node	PSM Ambiguity	Annotated Sequence	Modifications	# Protein Groups	# Proteins	Master Protein Accessions	Protein Accessions	# Missed Cleavages	Charge	DeltaScore	DeltaCn	Rank	Search Engine Rank	m/z [Da]	MH+ [Da]	Theo. MH+ [Da]	DeltaM [ppm]	Deltam/z [Da]	Activation Type	MS Order	Isolation Interference [%]	Ion Inject Time [ms]	RT [min]	First Scan	Spectrum File	File ID	XCorr	Percolator q-Value	Percolator PEP
		FALSE	High	Sequest HT (A2)	Unambiguous	FEELNADLFR		1	2	P11142	P54652; P11142	0	2	0.7429	0	1	1	627.312	1253.62	1253.62	0.83	0.00052	HCD (High Energy Collision Dissociation)	MS2	0	45	36.275	39285	WQR_1_20190806.raw	F4	3.19	0	0.01405
		FALSE	High	Sequest HT (A2)	Unambiguous	FEELNADLFR		1	2	P11142	P54652; P11142	0	2	0.6205	0	1	1	627.313	1253.62	1253.62	2.09	0.00131	HCD (High Energy Collision Dissociation)	MS2	12.8857	16.992	36.3107	39330	WQR_1_20190806.raw	F4	3.32	0.0007925	0.03843
	FALSE	High	FDDAVVQSDMK	1xOxidation [M10]	0.011862	0	1	1	2	P11142	0	1270.56	High	0	0.01894	3.35
		Checked	Confidence	Identifying Node	PSM Ambiguity	Annotated Sequence	Modifications	# Protein Groups	# Proteins	Master Protein Accessions	Protein Accessions	# Missed Cleavages	Charge	DeltaScore	DeltaCn	Rank	Search Engine Rank	m/z [Da]	MH+ [Da]	Theo. MH+ [Da]	DeltaM [ppm]	Deltam/z [Da]	Activation Type	MS Order	Isolation Interference [%]	Ion Inject Time [ms]	RT [min]	First Scan	Spectrum File	File ID	XCorr	Percolator q-Value	Percolator PEP
		FALSE	High	Sequest HT (A2)	Unambiguous	FDDAVVQSDmK	M10(Oxidation)	1	1	P11142	P11142	0	2	0.7015	0	1	1	635.786	1270.56	1270.56	2.36	0.0015	HCD (High Energy Collision Dissociation)	MS2	0	45	15.0288	13602	WQR_1_20190806.raw	F4	3.35	0	0.01894
		FALSE	High	Sequest HT (A2)	Unambiguous	FDDAVVQSDmK	M10(Oxidation)	1	1	P11142	P11142	0	2	0.7759	0	1	1	635.785	1270.56	1270.56	0.53	0.00034	HCD (High Energy Collision Dissociation)	MS2	0	45	15.0397	13614	WQR_1_20190806.raw	F4	2.9	0	0.01047
	FALSE	High	FDDAVVQSDMK		0.00568491	0	1	1	1	P11142	0	1254.57	High	0	0.004862	3.73
		Checked	Confidence	Identifying Node	PSM Ambiguity	Annotated Sequence	Modifications	# Protein Groups	# Proteins	Master Protein Accessions	Protein Accessions	# Missed Cleavages	Charge	DeltaScore	DeltaCn	Rank	Search Engine Rank	m/z [Da]	MH+ [Da]	Theo. MH+ [Da]	DeltaM [ppm]	Deltam/z [Da]	Activation Type	MS Order	Isolation Interference [%]	Ion Inject Time [ms]	RT [min]	First Scan	Spectrum File	File ID	XCorr	Percolator q-Value	Percolator PEP
		FALSE	High	Sequest HT (A2)	Unambiguous	FDDAVVQSDMK		1	1	P11142	P11142	0	2	0.7775	0	1	1	627.789	1254.57	1254.57	2.91	0.00182	HCD (High Energy Collision Dissociation)	MS2	7.90342	13.003	20.832	20358	WQR_1_20190806.raw	F4	3.73	0	0.004862
	FALSE	High	DAGTIAGLNVLR		0.0132947	0	1	1	1	P11142	0	1199.67	High	0	0.01181	3.08
		Checked	Confidence	Identifying Node	PSM Ambiguity	Annotated Sequence	Modifications	# Protein Groups	# Proteins	Master Protein Accessions	Protein Accessions	# Missed Cleavages	Charge	DeltaScore	DeltaCn	Rank	Search Engine Rank	m/z [Da]	MH+ [Da]	Theo. MH+ [Da]	DeltaM [ppm]	Deltam/z [Da]	Activation Type	MS Order	Isolation Interference [%]	Ion Inject Time [ms]	RT [min]	First Scan	Spectrum File	File ID	XCorr	Percolator q-Value	Percolator PEP
		FALSE	High	Sequest HT (A2)	Unambiguous	DAGTIAGLNVLR		1	1	P11142	P11142	0	2	0.724	0	1	1	600.341	1199.67	1199.67	0.39	0.00023	HCD (High Energy Collision Dissociation)	MS2	22.8823	2.56	33.8458	36333	WQR_1_20190806.raw	F4	3.08	0	0.01181
	FALSE	High	CNEIINWLDKNQTAEKEEFEHQQK	1xCarbamidomethyl [C1]	0.000400813	0	1	1	3	P11142	2	3031.42	High	0	0.0003071	7.66
		Checked	Confidence	Identifying Node	PSM Ambiguity	Annotated Sequence	Modifications	# Protein Groups	# Proteins	Master Protein Accessions	Protein Accessions	# Missed Cleavages	Charge	DeltaScore	DeltaCn	Rank	Search Engine Rank	m/z [Da]	MH+ [Da]	Theo. MH+ [Da]	DeltaM [ppm]	Deltam/z [Da]	Activation Type	MS Order	Isolation Interference [%]	Ion Inject Time [ms]	RT [min]	First Scan	Spectrum File	File ID	XCorr	Percolator q-Value	Percolator PEP
		FALSE	High	Sequest HT (A2)	Unambiguous	cNEIINWLDKNQTAEKEEFEHQQK	C1(Carbamidomethyl)	1	1	P11142	P11142	2	4	1	0	1	1	758.611	3031.42	3031.42	0.6	0.00045	HCD (High Energy Collision Dissociation)	MS2	16.801	7.974	32.7212	34967	WQR_1_20190806.raw	F4	7.66	0	0.0003071
		FALSE	High	Sequest HT (A2)	Unambiguous	cNEIINWLDKNQTAEKEEFEHQQK	C1(Carbamidomethyl)	1	1	P11142	P11142	2	4	0.5475	0	1	1	758.611	3031.42	3031.42	0.84	0.00064	HCD (High Energy Collision Dissociation)	MS2	37.9984	14.092	32.8808	35184	WQR_1_20190806.raw	F4	3.58	0	0.0008381
		FALSE	High	Sequest HT (A2)	Unambiguous	cNEIINWLDKNQTAEKEEFEHQQK	C1(Carbamidomethyl)	1	1	P11142	P11142	2	4	0.5538	0	1	1	758.611	3031.42	3031.42	0.84	0.00064	HCD (High Energy Collision Dissociation)	MS2	47.8028	17.144	32.8839	35189	WQR_1_20190806.raw	F4	3.9	0	0.001159
	FALSE	High	CNEIINWLDK	1xCarbamidomethyl [C1]	0.024615	0	1	1	3	P11142	0	1304.63	High	0	0.0224	3.72
		Checked	Confidence	Identifying Node	PSM Ambiguity	Annotated Sequence	Modifications	# Protein Groups	# Proteins	Master Protein Accessions	Protein Accessions	# Missed Cleavages	Charge	DeltaScore	DeltaCn	Rank	Search Engine Rank	m/z [Da]	MH+ [Da]	Theo. MH+ [Da]	DeltaM [ppm]	Deltam/z [Da]	Activation Type	MS Order	Isolation Interference [%]	Ion Inject Time [ms]	RT [min]	First Scan	Spectrum File	File ID	XCorr	Percolator q-Value	Percolator PEP
		FALSE	High	Sequest HT (A2)	Unambiguous	cNEIINWLDK	C1(Carbamidomethyl)	1	1	P11142	P11142	0	2	0.6505	0	1	1	652.818	1304.63	1304.63	-1.44	-0.00094	HCD (High Energy Collision Dissociation)	MS2	16.1438	30.584	38.6749	42136	WQR_1_20190806.raw	F4	3.72	0	0.0224
		FALSE	High	Sequest HT (A2)	Unambiguous	cNEIINWLDK	C1(Carbamidomethyl)	1	1	P11142	P11142	0	2	0.4976	0	1	1	652.82	1304.63	1304.63	2.3	0.0015	HCD (High Energy Collision Dissociation)	MS2	25.0785	43.011	52.7017	58264	WQR_1_20190806.raw	F4	2.11	0.001475	0.0834
		FALSE	High	Sequest HT (A2)	Unambiguous	cNEIINWLDK	C1(Carbamidomethyl)	1	1	P11142	P11142	0	2	0.6143	0	1	1	652.82	1304.63	1304.63	1.93	0.00126	HCD (High Energy Collision Dissociation)	MS2	0	45	52.6309	58191	WQR_1_20190806.raw	F4	2.23	0.002119	0.1404
	FALSE	High	ARFEELNADLFR		0.00156268	0	1	2	1	P11142	1	1480.75	High	0	0.001265	3.74
		Checked	Confidence	Identifying Node	PSM Ambiguity	Annotated Sequence	Modifications	# Protein Groups	# Proteins	Master Protein Accessions	Protein Accessions	# Missed Cleavages	Charge	DeltaScore	DeltaCn	Rank	Search Engine Rank	m/z [Da]	MH+ [Da]	Theo. MH+ [Da]	DeltaM [ppm]	Deltam/z [Da]	Activation Type	MS Order	Isolation Interference [%]	Ion Inject Time [ms]	RT [min]	First Scan	Spectrum File	File ID	XCorr	Percolator q-Value	Percolator PEP
		FALSE	High	Sequest HT (A2)	Unambiguous	ARFEELNADLFR		1	2	P11142	P54652; P11142	1	2	0.5508	0	1	1	740.882	1480.76	1480.75	1.08	0.0008	HCD (High Energy Collision Dissociation)	MS2	10.6323	12.693	32.7218	34968	WQR_1_20190806.raw	F4	3.74	0	0.001265
	FALSE	High	GPAVGIDLGTTYSCVGVFQHGK	1xCarbamidomethyl [C14]	3.81367e-06	0	1	1	4	P11142	0	2263.12	High	0	2.408e-06	7.01
		Checked	Confidence	Identifying Node	PSM Ambiguity	Annotated Sequence	Modifications	# Protein Groups	# Proteins	Master Protein Accessions	Protein Accessions	# Missed Cleavages	Charge	DeltaScore	DeltaCn	Rank	Search Engine Rank	m/z [Da]	MH+ [Da]	Theo. MH+ [Da]	DeltaM [ppm]	Deltam/z [Da]	Activation Type	MS Order	Isolation Interference [%]	Ion Inject Time [ms]	RT [min]	First Scan	Spectrum File	File ID	XCorr	Percolator q-Value	Percolator PEP
		FALSE	High	Sequest HT (A2)	Unambiguous	GPAVGIDLGTTYScVGVFQHGK	C14(Carbamidomethyl)	1	1	P11142	P11142	0	3	0.7537	0	1	1	755.045	2263.12	2263.12	1.16	0.00088	HCD (High Energy Collision Dissociation)	MS2	2.87572	5.915	36.2422	39242	WQR_1_20190806.raw	F4	6.74	0	8.4e-05
		FALSE	High	Sequest HT (A2)	Unambiguous	GPAVGIDLGTTYScVGVFQHGK	C14(Carbamidomethyl)	1	1	P11142	P11142	0	3	0.7603	0	1	1	755.045	2263.12	2263.12	1.16	0.00088	HCD (High Energy Collision Dissociation)	MS2	0	5.658	36.2446	39246	WQR_1_20190806.raw	F4	7.01	0	2.408e-06
		FALSE	High	Sequest HT (A2)	Unambiguous	GPAVGIDLGTTYScVGVFQHGK	C14(Carbamidomethyl)	1	1	P11142	P11142	0	3	0.7429	0	1	1	755.045	2263.12	2263.12	1.16	0.00088	HCD (High Energy Collision Dissociation)	MS2	0	6.03	36.2452	39247	WQR_1_20190806.raw	F4	6.34	0	0.0003398
		FALSE	High	Sequest HT (A2)	Unambiguous	GPAVGIDLGTTYScVGVFQHGK	C14(Carbamidomethyl)	1	1	P11142	P11142	0	3	0.7721	0	1	1	755.045	2263.12	2263.12	1.65	0.00124	HCD (High Energy Collision Dissociation)	MS2	0	1.639	36.2501	39252	WQR_1_20190806.raw	F4	6.23	0	1.147e-05
	FALSE	High	HWPFMVVNDAGRPK		0.00196441	0	1	1	5	P11142	0	1653.83	High	0	0.001607	4.34
		Checked	Confidence	Identifying Node	PSM Ambiguity	Annotated Sequence	Modifications	# Protein Groups	# Proteins	Master Protein Accessions	Protein Accessions	# Missed Cleavages	Charge	DeltaScore	DeltaCn	Rank	Search Engine Rank	m/z [Da]	MH+ [Da]	Theo. MH+ [Da]	DeltaM [ppm]	Deltam/z [Da]	Activation Type	MS Order	Isolation Interference [%]	Ion Inject Time [ms]	RT [min]	First Scan	Spectrum File	File ID	XCorr	Percolator q-Value	Percolator PEP
		FALSE	High	Sequest HT (A2)	Unambiguous	HWPFMVVNDAGRPK		1	1	P11142	P11142	0	3	0.7273	0	1	1	551.949	1653.83	1653.83	0.76	0.00042	HCD (High Energy Collision Dissociation)	MS2	2.50328	1.771	27.4943	28509	WQR_1_20190806.raw	F4	3.96	0	0.01023
		FALSE	High	Sequest HT (A2)	Unambiguous	HWPFMVVNDAGRPK		1	1	P11142	P11142	0	3	0.7673	0	1	1	551.949	1653.83	1653.83	0.87	0.00048	HCD (High Energy Collision Dissociation)	MS2	0	1.306	27.4538	28457	WQR_1_20190806.raw	F4	4.34	0	0.001607
		FALSE	High	Sequest HT (A2)	Unambiguous	HWPFMVVNDAGRPK		1	1	P11142	P11142	0	3	0.7415	0	1	1	551.949	1653.83	1653.83	0.87	0.00048	HCD (High Energy Collision Dissociation)	MS2	1.53907	1.228	27.4533	28456	WQR_1_20190806.raw	F4	4.1	0	0.01433
		FALSE	High	Sequest HT (A2)	Unambiguous	HWPFMVVNDAGRPK		1	1	P11142	P11142	0	3	0.6913	0	1	1	551.949	1653.83	1653.83	0.87	0.00048	HCD (High Energy Collision Dissociation)	MS2	5.24431	1.217	27.4527	28455	WQR_1_20190806.raw	F4	3.66	0	0.01167
		FALSE	High	Sequest HT (A2)	Unambiguous	HWPFMVVNDAGRPK		1	1	P11142	P11142	0	2	0.7041	0	1	1	827.421	1653.84	1653.83	2.06	0.00171	HCD (High Energy Collision Dissociation)	MS2	0	36.826	27.6805	28753	WQR_1_20190806.raw	F4	2.67	0.0007925	0.06415
	FALSE	High	HWPFMVVNDAGRPK	1xOxidation [M5]	0.0245115	0	1	1	1	P11142	0	1669.83	High	0	0.02226	4.16
		Checked	Confidence	Identifying Node	PSM Ambiguity	Annotated Sequence	Modifications	# Protein Groups	# Proteins	Master Protein Accessions	Protein Accessions	# Missed Cleavages	Charge	DeltaScore	DeltaCn	Rank	Search Engine Rank	m/z [Da]	MH+ [Da]	Theo. MH+ [Da]	DeltaM [ppm]	Deltam/z [Da]	Activation Type	MS Order	Isolation Interference [%]	Ion Inject Time [ms]	RT [min]	First Scan	Spectrum File	File ID	XCorr	Percolator q-Value	Percolator PEP
		FALSE	High	Sequest HT (A2)	Unambiguous	HWPFmVVNDAGRPK	M5(Oxidation)	1	1	P11142	P11142	0	3	0.6178	0	1	1	557.283	1669.83	1669.83	4.2	0.00234	HCD (High Energy Collision Dissociation)	MS2	21.3836	38.732	23.6544	23803	WQR_1_20190806.raw	F4	4.16	0	0.02226
	FALSE	High	MKEIAEAYLGK	1xOxidation [M1]	0.073154	0.00152962	1	1	1	P11142	1	1268.66	High	0.0007925	0.06929	2.91
		Checked	Confidence	Identifying Node	PSM Ambiguity	Annotated Sequence	Modifications	# Protein Groups	# Proteins	Master Protein Accessions	Protein Accessions	# Missed Cleavages	Charge	DeltaScore	DeltaCn	Rank	Search Engine Rank	m/z [Da]	MH+ [Da]	Theo. MH+ [Da]	DeltaM [ppm]	Deltam/z [Da]	Activation Type	MS Order	Isolation Interference [%]	Ion Inject Time [ms]	RT [min]	First Scan	Spectrum File	File ID	XCorr	Percolator q-Value	Percolator PEP
		FALSE	High	Sequest HT (A2)	Unambiguous	mKEIAEAYLGK	M1(Oxidation)	1	1	P11142	P11142	1	3	0.5945	0	1	1	423.557	1268.66	1268.66	1.05	0.00044	HCD (High Energy Collision Dissociation)	MS2	56.2916	33.468	17.4489	16364	WQR_1_20190806.raw	F4	2.91	0.0007925	0.06929
	FALSE	High	LLQDFFNGK		0.0554656	0.00152962	2	3	1	P17066; P11142	0	1081.57	High	0.0007925	0.05187	2.67
		Checked	Confidence	Identifying Node	PSM Ambiguity	Annotated Sequence	Modifications	# Protein Groups	# Proteins	Master Protein Accessions	Protein Accessions	# Missed Cleavages	Charge	DeltaScore	DeltaCn	Rank	Search Engine Rank	m/z [Da]	MH+ [Da]	Theo. MH+ [Da]	DeltaM [ppm]	Deltam/z [Da]	Activation Type	MS Order	Isolation Interference [%]	Ion Inject Time [ms]	RT [min]	First Scan	Spectrum File	File ID	XCorr	Percolator q-Value	Percolator PEP
		FALSE	High	Sequest HT (A2)	Unambiguous	LLQDFFNGK		2	3	P17066; P11142	P17066; P54652; P11142	0	2	0.4906	0	1	1	541.287	1081.57	1081.57	-1.8	-0.00097	HCD (High Energy Collision Dissociation)	MS2	0	31.985	33.8626	36355	WQR_1_20190806.raw	F4	2.67	0.0007925	0.05187
	FALSE	High	VEIIANDQGNR		0.0543262	0.00152962	5	7	6	P17066; P11142; P11021; P0DMV9; P34931	0	1228.63	High	0.0007925	0.05308	3.02
		Checked	Confidence	Identifying Node	PSM Ambiguity	Annotated Sequence	Modifications	# Protein Groups	# Proteins	Master Protein Accessions	Protein Accessions	# Missed Cleavages	Charge	DeltaScore	DeltaCn	Rank	Search Engine Rank	m/z [Da]	MH+ [Da]	Theo. MH+ [Da]	DeltaM [ppm]	Deltam/z [Da]	Activation Type	MS Order	Isolation Interference [%]	Ion Inject Time [ms]	RT [min]	First Scan	Spectrum File	File ID	XCorr	Percolator q-Value	Percolator PEP
		FALSE	High	Sequest HT (A2)	Unambiguous	VEIIANDQGNR		4	5	P11142; P11021; P0DMV9; P34931	P54652; P11142; P11021; P0DMV9; P34931	0	2		0	1	2	614.818	1228.63	1228.63	-0.05	-3e-05	HCD (High Energy Collision Dissociation)	MS2	53.266	45	13.8411	12226	WQR_1_20190806.raw	F4	2.96	0.0007925	0.05085
		FALSE	High	Sequest HT (A2)	Unambiguous	VEIIANDQGNR		4	5	P11142; P11021; P0DMV9; P34931	P54652; P11142; P11021; P0DMV9; P34931	0	2	0	0	1	1	614.817	1228.63	1228.63	-0.55	-0.00034	HCD (High Energy Collision Dissociation)	MS2	14.9929	45	13.8462	12231	WQR_1_20190806.raw	F4	3.02	0.0007925	0.05308
		FALSE	High	Sequest HT (A2)	Unambiguous	VEILANDQGNR		2	2	P17066	P48741; P17066	0	2		0	1	2	614.817	1228.63	1228.63	-0.55	-0.00034	HCD (High Energy Collision Dissociation)	MS2	14.9929	45	13.8462	12231	WQR_1_20190806.raw	F4	3.02	0.0007925	0.05308
		FALSE	High	Sequest HT (A2)	Unambiguous	VEILANDQGNR		2	2	P17066	P48741; P17066	0	2	0	0	1	1	614.818	1228.63	1228.63	-0.05	-3e-05	HCD (High Energy Collision Dissociation)	MS2	53.266	45	13.8411	12226	WQR_1_20190806.raw	F4	2.96	0.0007925	0.05085
		FALSE	High	Sequest HT (A2)	Unambiguous	VEILANDQGNR		2	2	P17066	P48741; P17066	0	2	0	0	1	1	614.817	1228.63	1228.63	-0.75	-0.00046	HCD (High Energy Collision Dissociation)	MS2	0	45	13.879	12268	WQR_1_20190806.raw	F4	2.66	0.002119	0.121
		FALSE	High	Sequest HT (A2)	Unambiguous	VEIIANDQGNR		4	5	P11142; P11021; P0DMV9; P34931	P54652; P11142; P11021; P0DMV9; P34931	0	2		0	1	2	614.817	1228.63	1228.63	-0.75	-0.00046	HCD (High Energy Collision Dissociation)	MS2	0	45	13.879	12268	WQR_1_20190806.raw	F4	2.66	0.002119	0.121
	FALSE	High	NSLESYAFNMK	1xOxidation [M10]	0.0508309	0.00152962	1	1	1	P11142	0	1319.59	High	0.0007925	0.0474	2.67
		Checked	Confidence	Identifying Node	PSM Ambiguity	Annotated Sequence	Modifications	# Protein Groups	# Proteins	Master Protein Accessions	Protein Accessions	# Missed Cleavages	Charge	DeltaScore	DeltaCn	Rank	Search Engine Rank	m/z [Da]	MH+ [Da]	Theo. MH+ [Da]	DeltaM [ppm]	Deltam/z [Da]	Activation Type	MS Order	Isolation Interference [%]	Ion Inject Time [ms]	RT [min]	First Scan	Spectrum File	File ID	XCorr	Percolator q-Value	Percolator PEP
		FALSE	High	Sequest HT (A2)	Unambiguous	NSLESYAFNmK	M10(Oxidation)	1	1	P11142	P11142	0	2	0.4419	0	1	1	660.301	1319.59	1319.59	0.96	0.00063	HCD (High Energy Collision Dissociation)	MS2	31.0958	20.84	23.9521	24186	WQR_1_20190806.raw	F4	2.67	0.0007925	0.0474
	FALSE	High	RFDDAVVQSDMK	1xOxidation [M11]	0.194742	0.00497177	1	1	1	P11142	1	1426.66	High	0.003364	0.19	2.7
		Checked	Confidence	Identifying Node	PSM Ambiguity	Annotated Sequence	Modifications	# Protein Groups	# Proteins	Master Protein Accessions	Protein Accessions	# Missed Cleavages	Charge	DeltaScore	DeltaCn	Rank	Search Engine Rank	m/z [Da]	MH+ [Da]	Theo. MH+ [Da]	DeltaM [ppm]	Deltam/z [Da]	Activation Type	MS Order	Isolation Interference [%]	Ion Inject Time [ms]	RT [min]	First Scan	Spectrum File	File ID	XCorr	Percolator q-Value	Percolator PEP
		FALSE	High	Sequest HT (A2)	Unambiguous	RFDDAVVQSDmK	M11(Oxidation)	1	1	P11142	P11142	1	3	0.5815	0	1	1	476.225	1426.66	1426.66	-0.89	-0.00042	HCD (High Energy Collision Dissociation)	MS2	60.6425	26.035	13.3271	11615	WQR_1_20190806.raw	F4	2.7	0.003364	0.19
	FALSE	High	VCNPIITK	1xCarbamidomethyl [C2]	0.22193	0.00596215	1	1	1	P11142	0	944.523	High	0.00393	0.2168	2.22
		Checked	Confidence	Identifying Node	PSM Ambiguity	Annotated Sequence	Modifications	# Protein Groups	# Proteins	Master Protein Accessions	Protein Accessions	# Missed Cleavages	Charge	DeltaScore	DeltaCn	Rank	Search Engine Rank	m/z [Da]	MH+ [Da]	Theo. MH+ [Da]	DeltaM [ppm]	Deltam/z [Da]	Activation Type	MS Order	Isolation Interference [%]	Ion Inject Time [ms]	RT [min]	First Scan	Spectrum File	File ID	XCorr	Percolator q-Value	Percolator PEP
		FALSE	High	Sequest HT (A2)	Unambiguous	VcNPIITK	C2(Carbamidomethyl)	1	1	P11142	P11142	0	2	0.6081	0	1	1	472.767	944.526	944.523	2.97	0.0014	HCD (High Energy Collision Dissociation)	MS2	31.7684	31.624	14.9782	13545	WQR_1_20190806.raw	F4	2.22	0.00393	0.2168
FALSE	High	Master Protein	P04264	Keratin, type II cytoskeletal 1 OS=Homo sapiens OX=9606 GN=KRT1 PE=1 SV=6	0	98.492	58	38	63	33	1	644	66	8.12	253.96	38
	Checked	Confidence	Sequence	Modifications	Qvality PEP	Qvality q-value	# Protein Groups	# Proteins	# PSMs	Master Protein Accessions	# Missed Cleavages	Theo. MH+ [Da]	Confidence (by Search Engine): Sequest HT	Percolator q-Value (by Search Engine): Sequest HT	Percolator PEP (by Search Engine): Sequest HT	XCorr (by Search Engine): Sequest HT
	FALSE	High	LNDLEDALQQAKEDLAR		5.70173e-05	0	1	1	2	P04264	1	1941.99	High	0	4.03e-05	5.87
		Checked	Confidence	Identifying Node	PSM Ambiguity	Annotated Sequence	Modifications	# Protein Groups	# Proteins	Master Protein Accessions	Protein Accessions	# Missed Cleavages	Charge	DeltaScore	DeltaCn	Rank	Search Engine Rank	m/z [Da]	MH+ [Da]	Theo. MH+ [Da]	DeltaM [ppm]	Deltam/z [Da]	Activation Type	MS Order	Isolation Interference [%]	Ion Inject Time [ms]	RT [min]	First Scan	Spectrum File	File ID	XCorr	Percolator q-Value	Percolator PEP
		FALSE	High	Sequest HT (A2)	Unambiguous	LNDLEDALQQAKEDLAR		1	1	P04264	P04264	1	3	0.5332	0	1	1	648.002	1941.99	1941.99	1.62	0.00105	HCD (High Energy Collision Dissociation)	MS2	8.62388	7.556	43.8972	48299	WQR_1_20190806.raw	F4	5.87	0	4.03e-05
		FALSE	High	Sequest HT (A2)	Unambiguous	LNDLEDALQQAKEDLAR		1	1	P04264	P04264	1	3	0.5091	0	1	1	648.001	1941.99	1941.99	0.11	7e-05	HCD (High Energy Collision Dissociation)	MS2	14.9821	8.919	43.8737	48268	WQR_1_20190806.raw	F4	5.48	0	0.0002828
	FALSE	High	LNDLEDALQQAK		0.00224959	0	1	1	1	P04264	0	1357.7	High	0	0.001855	3.68
		Checked	Confidence	Identifying Node	PSM Ambiguity	Annotated Sequence	Modifications	# Protein Groups	# Proteins	Master Protein Accessions	Protein Accessions	# Missed Cleavages	Charge	DeltaScore	DeltaCn	Rank	Search Engine Rank	m/z [Da]	MH+ [Da]	Theo. MH+ [Da]	DeltaM [ppm]	Deltam/z [Da]	Activation Type	MS Order	Isolation Interference [%]	Ion Inject Time [ms]	RT [min]	First Scan	Spectrum File	File ID	XCorr	Percolator q-Value	Percolator PEP
		FALSE	High	Sequest HT (A2)	Unambiguous	LNDLEDALQQAK		1	1	P04264	P04264	0	2	0.6929	0	1	1	679.353	1357.7	1357.7	1.76	0.00119	HCD (High Energy Collision Dissociation)	MS2	0	45	28.6916	30003	WQR_1_20190806.raw	F4	3.68	0	0.001855
	FALSE	High	TNAENEFVTIK		0.00936275	0	1	1	1	P04264	0	1265.64	High	0	0.0082	2.79
		Checked	Confidence	Identifying Node	PSM Ambiguity	Annotated Sequence	Modifications	# Protein Groups	# Proteins	Master Protein Accessions	Protein Accessions	# Missed Cleavages	Charge	DeltaScore	DeltaCn	Rank	Search Engine Rank	m/z [Da]	MH+ [Da]	Theo. MH+ [Da]	DeltaM [ppm]	Deltam/z [Da]	Activation Type	MS Order	Isolation Interference [%]	Ion Inject Time [ms]	RT [min]	First Scan	Spectrum File	File ID	XCorr	Percolator q-Value	Percolator PEP
		FALSE	High	Sequest HT (A2)	Unambiguous	TNAENEFVTIK		1	1	P04264	P04264	0	2	0.5376	0	1	1	633.324	1265.64	1265.64	2.16	0.00137	HCD (High Energy Collision Dissociation)	MS2	72.5426	6.993	22.9819	22984	WQR_1_20190806.raw	F4	2.79	0	0.0082
	FALSE	High	TNAENEFVTIKK		0.0144661	0	1	1	1	P04264	1	1393.73	High	0	0.01285	4.13
		Checked	Confidence	Identifying Node	PSM Ambiguity	Annotated Sequence	Modifications	# Protein Groups	# Proteins	Master Protein Accessions	Protein Accessions	# Missed Cleavages	Charge	DeltaScore	DeltaCn	Rank	Search Engine Rank	m/z [Da]	MH+ [Da]	Theo. MH+ [Da]	DeltaM [ppm]	Deltam/z [Da]	Activation Type	MS Order	Isolation Interference [%]	Ion Inject Time [ms]	RT [min]	First Scan	Spectrum File	File ID	XCorr	Percolator q-Value	Percolator PEP
		FALSE	High	Sequest HT (A2)	Unambiguous	TNAENEFVTIKK		1	1	P04264	P04264	1	3	0.7603	0	1	1	465.249	1393.73	1393.73	0.12	5e-05	HCD (High Energy Collision Dissociation)	MS2	17.9464	8.851	17.3	16192	WQR_1_20190806.raw	F4	4.13	0	0.01285
	FALSE	High	LDSELKNMQDMVEDYR	2xOxidation [M8; M11]	0.0120641	0	1	1	2	P04264	1	2017.88	High	0	0.01063	4.01
		Checked	Confidence	Identifying Node	PSM Ambiguity	Annotated Sequence	Modifications	# Protein Groups	# Proteins	Master Protein Accessions	Protein Accessions	# Missed Cleavages	Charge	DeltaScore	DeltaCn	Rank	Search Engine Rank	m/z [Da]	MH+ [Da]	Theo. MH+ [Da]	DeltaM [ppm]	Deltam/z [Da]	Activation Type	MS Order	Isolation Interference [%]	Ion Inject Time [ms]	RT [min]	First Scan	Spectrum File	File ID	XCorr	Percolator q-Value	Percolator PEP
		FALSE	High	Sequest HT (A2)	Unambiguous	LDSELKNmQDmVEDYR	M8(Oxidation); M11(Oxidation)	1	1	P04264	P04264	1	3	0.611	0	1	1	673.3	2017.89	2017.88	1.09	0.00073	HCD (High Energy Collision Dissociation)	MS2	22.8723	40.798	19.0062	18186	WQR_1_20190806.raw	F4	4.01	0	0.01063
		FALSE	High	Sequest HT (A2)	Unambiguous	LDSELKNmQDmVEDYR	M8(Oxidation); M11(Oxidation)	1	1	P04264	P04264	1	3	0.6163	0	1	1	673.3	2017.89	2017.88	1.18	0.00079	HCD (High Energy Collision Dissociation)	MS2	35.1897	45	19.039	18229	WQR_1_20190806.raw	F4	3.44	0	0.01351
	FALSE	High	LALDLEIATYR		0.0174921	0	1	6	2	P04264	0	1277.71	High	0	0.01565	3.26
		Checked	Confidence	Identifying Node	PSM Ambiguity	Annotated Sequence	Modifications	# Protein Groups	# Proteins	Master Protein Accessions	Protein Accessions	# Missed Cleavages	Charge	DeltaScore	DeltaCn	Rank	Search Engine Rank	m/z [Da]	MH+ [Da]	Theo. MH+ [Da]	DeltaM [ppm]	Deltam/z [Da]	Activation Type	MS Order	Isolation Interference [%]	Ion Inject Time [ms]	RT [min]	First Scan	Spectrum File	File ID	XCorr	Percolator q-Value	Percolator PEP
		FALSE	High	Sequest HT (A2)	Unambiguous	LALDIEIATYR		1	5		P08729; P14136; Q6KB66; P19013; P05787	0	2		0	1	2	639.359	1277.71	1277.71	0.5	0.00032	HCD (High Energy Collision Dissociation)	MS2	6.57836	6.359	39.776	43435	WQR_1_20190806.raw	F4	3.26	0	0.01565
		FALSE	High	Sequest HT (A2)	Unambiguous	LALDLEIATYR		1	1	P04264	P04264	0	2	0	0	1	1	639.359	1277.71	1277.71	0.5	0.00032	HCD (High Energy Collision Dissociation)	MS2	6.57836	6.359	39.776	43435	WQR_1_20190806.raw	F4	3.26	0	0.01565
	FALSE	High	SGGGFSSGSAGIINYQR		0.00145407	0	1	1	1	P04264	0	1657.79	High	0	0.001176	4.77
		Checked	Confidence	Identifying Node	PSM Ambiguity	Annotated Sequence	Modifications	# Protein Groups	# Proteins	Master Protein Accessions	Protein Accessions	# Missed Cleavages	Charge	DeltaScore	DeltaCn	Rank	Search Engine Rank	m/z [Da]	MH+ [Da]	Theo. MH+ [Da]	DeltaM [ppm]	Deltam/z [Da]	Activation Type	MS Order	Isolation Interference [%]	Ion Inject Time [ms]	RT [min]	First Scan	Spectrum File	File ID	XCorr	Percolator q-Value	Percolator PEP
		FALSE	High	Sequest HT (A2)	Unambiguous	SGGGFSSGSAGIINYQR		1	1	P04264	P04264	0	2	0.7547	0	1	1	829.4	1657.79	1657.79	0.38	0.00032	HCD (High Energy Collision Dissociation)	MS2	0	35.746	24.9191	25348	WQR_1_20190806.raw	F4	4.77	0	0.001176
	FALSE	High	SLNNQFASFIDKVR		0.00226873	0	1	1	3	P04264	1	1638.86	High	0	0.003339	4.25
		Checked	Confidence	Identifying Node	PSM Ambiguity	Annotated Sequence	Modifications	# Protein Groups	# Proteins	Master Protein Accessions	Protein Accessions	# Missed Cleavages	Charge	DeltaScore	DeltaCn	Rank	Search Engine Rank	m/z [Da]	MH+ [Da]	Theo. MH+ [Da]	DeltaM [ppm]	Deltam/z [Da]	Activation Type	MS Order	Isolation Interference [%]	Ion Inject Time [ms]	RT [min]	First Scan	Spectrum File	File ID	XCorr	Percolator q-Value	Percolator PEP
		FALSE	High	Sequest HT (A2)	Unambiguous	SLNNQFASFIDKVR		1	1	P04264	P04264	1	3	0.6415	0	1	1	546.959	1638.86	1638.86	1.01	0.00055	HCD (High Energy Collision Dissociation)	MS2	6.50877	5.789	38.7507	42228	WQR_1_20190806.raw	F4	4.1	0	0.001869
		FALSE	High	Sequest HT (A2)	Unambiguous	SLNNQFASFIDKVR		1	1	P04264	P04264	1	3	0.638	0	1	1	546.959	1638.86	1638.86	1.01	0.00055	HCD (High Energy Collision Dissociation)	MS2	0	7.124	38.793	42277	WQR_1_20190806.raw	F4	3.95	0	0.005085
		FALSE	High	Sequest HT (A2)	Unambiguous	SLNNQFASFIDKVR		1	1	P04264	P04264	1	3	0.6047	0	1	1	546.958	1638.86	1638.86	0.67	0.00037	HCD (High Energy Collision Dissociation)	MS2	0	5.285	38.7667	42248	WQR_1_20190806.raw	F4	4.25	0	0.003339
	FALSE	High	SLDLDSIIAEVKAQYEDIAQK		0.00583104	0	1	1	1	P04264	1	2349.22	High	0	0.004986	2.49
		Checked	Confidence	Identifying Node	PSM Ambiguity	Annotated Sequence	Modifications	# Protein Groups	# Proteins	Master Protein Accessions	Protein Accessions	# Missed Cleavages	Charge	DeltaScore	DeltaCn	Rank	Search Engine Rank	m/z [Da]	MH+ [Da]	Theo. MH+ [Da]	DeltaM [ppm]	Deltam/z [Da]	Activation Type	MS Order	Isolation Interference [%]	Ion Inject Time [ms]	RT [min]	First Scan	Spectrum File	File ID	XCorr	Percolator q-Value	Percolator PEP
		FALSE	High	Sequest HT (A2)	Unambiguous	SLDLDSIIAEVKAQYEDIAQK		1	1	P04264	P04264	1	3	0.6345	0	1	1	783.744	2349.22	2349.22	-0.54	-0.00042	HCD (High Energy Collision Dissociation)	MS2	49.2639	45	56.1845	61932	WQR_1_20190806.raw	F4	2.49	0	0.004986
	FALSE	High	SLDLDSIIAEVK		0.0244084	0	1	1	1	P04264	0	1302.72	High	0	0.0222	3.77
		Checked	Confidence	Identifying Node	PSM Ambiguity	Annotated Sequence	Modifications	# Protein Groups	# Proteins	Master Protein Accessions	Protein Accessions	# Missed Cleavages	Charge	DeltaScore	DeltaCn	Rank	Search Engine Rank	m/z [Da]	MH+ [Da]	Theo. MH+ [Da]	DeltaM [ppm]	Deltam/z [Da]	Activation Type	MS Order	Isolation Interference [%]	Ion Inject Time [ms]	RT [min]	First Scan	Spectrum File	File ID	XCorr	Percolator q-Value	Percolator PEP
		FALSE	High	Sequest HT (A2)	Unambiguous	SLDLDSIIAEVK		1	1	P04264	P04264	0	2	0.6366	0	1	1	651.862	1302.72	1302.72	1.41	0.00092	HCD (High Energy Collision Dissociation)	MS2	0	25.278	47.6488	52655	WQR_1_20190806.raw	F4	3.77	0	0.0222
	FALSE	High	SKAEAESLYQSK		0.00603174	0	1	1	1	P04264	1	1340.67	High	0	0.005164	3.69
		Checked	Confidence	Identifying Node	PSM Ambiguity	Annotated Sequence	Modifications	# Protein Groups	# Proteins	Master Protein Accessions	Protein Accessions	# Missed Cleavages	Charge	DeltaScore	DeltaCn	Rank	Search Engine Rank	m/z [Da]	MH+ [Da]	Theo. MH+ [Da]	DeltaM [ppm]	Deltam/z [Da]	Activation Type	MS Order	Isolation Interference [%]	Ion Inject Time [ms]	RT [min]	First Scan	Spectrum File	File ID	XCorr	Percolator q-Value	Percolator PEP
		FALSE	High	Sequest HT (A2)	Unambiguous	SKAEAESLYQSK		1	1	P04264	P04264	1	2	0.6911	0	1	1	670.839	1340.67	1340.67	0.55	0.00037	HCD (High Energy Collision Dissociation)	MS2	0	45	10.8446	8702	WQR_1_20190806.raw	F4	3.69	0	0.005164
	FALSE	High	SLNNQFASFIDK		0.00511436	0	1	1	1	P04264	0	1383.69	High	0	0.004359	3.6
		Checked	Confidence	Identifying Node	PSM Ambiguity	Annotated Sequence	Modifications	# Protein Groups	# Proteins	Master Protein Accessions	Protein Accessions	# Missed Cleavages	Charge	DeltaScore	DeltaCn	Rank	Search Engine Rank	m/z [Da]	MH+ [Da]	Theo. MH+ [Da]	DeltaM [ppm]	Deltam/z [Da]	Activation Type	MS Order	Isolation Interference [%]	Ion Inject Time [ms]	RT [min]	First Scan	Spectrum File	File ID	XCorr	Percolator q-Value	Percolator PEP
		FALSE	High	Sequest HT (A2)	Unambiguous	SLNNQFASFIDK		1	1	P04264	P04264	0	2	0.5611	0	1	1	692.35	1383.69	1383.69	2.15	0.00149	HCD (High Energy Collision Dissociation)	MS2	46.1581	45	35.1443	37963	WQR_1_20190806.raw	F4	3.6	0	0.004359
	FALSE	High	THNLEPYFESFINNLR		0.000411139	0	1	1	4	P04264	0	1993.98	High	0	0.0003155	5.88
		Checked	Confidence	Identifying Node	PSM Ambiguity	Annotated Sequence	Modifications	# Protein Groups	# Proteins	Master Protein Accessions	Protein Accessions	# Missed Cleavages	Charge	DeltaScore	DeltaCn	Rank	Search Engine Rank	m/z [Da]	MH+ [Da]	Theo. MH+ [Da]	DeltaM [ppm]	Deltam/z [Da]	Activation Type	MS Order	Isolation Interference [%]	Ion Inject Time [ms]	RT [min]	First Scan	Spectrum File	File ID	XCorr	Percolator q-Value	Percolator PEP
		FALSE	High	Sequest HT (A2)	Unambiguous	THNLEPYFESFINNLR		1	1	P04264	P04264	0	3	0.6652	0	1	1	665.331	1993.98	1993.98	1.17	0.00078	HCD (High Energy Collision Dissociation)	MS2	24.7168	31.37	48.5077	53644	WQR_1_20190806.raw	F4	4.54	0	0.001559
		FALSE	High	Sequest HT (A2)	Unambiguous	THNLEPYFESFINNLR		1	1	P04264	P04264	0	3	0.7687	0	1	1	665.331	1993.98	1993.98	1.07	0.00071	HCD (High Energy Collision Dissociation)	MS2	0	45	48.5018	53638	WQR_1_20190806.raw	F4	5.88	0	0.0003155
		FALSE	High	Sequest HT (A2)	Unambiguous	THNLEPYFESFINNLR		1	1	P04264	P04264	0	3	0.726	0	1	1	665.33	1993.98	1993.98	0.06	4e-05	HCD (High Energy Collision Dissociation)	MS2	0	45	48.4369	53567	WQR_1_20190806.raw	F4	5	0	0.00176
		FALSE	High	Sequest HT (A2)	Unambiguous	THNLEPYFESFINNLR		1	1	P04264	P04264	0	3	0.7584	0	1	1	665.33	1993.98	1993.98	0.06	4e-05	HCD (High Energy Collision Dissociation)	MS2	0	45	48.4341	53564	WQR_1_20190806.raw	F4	5.38	0	0.0003537
	FALSE	High	NKLNDLEDALQQAKEDLAR		1.0416e-05	0	1	1	4	P04264	2	2184.13	High	0	7.778e-05	7.45
		Checked	Confidence	Identifying Node	PSM Ambiguity	Annotated Sequence	Modifications	# Protein Groups	# Proteins	Master Protein Accessions	Protein Accessions	# Missed Cleavages	Charge	DeltaScore	DeltaCn	Rank	Search Engine Rank	m/z [Da]	MH+ [Da]	Theo. MH+ [Da]	DeltaM [ppm]	Deltam/z [Da]	Activation Type	MS Order	Isolation Interference [%]	Ion Inject Time [ms]	RT [min]	First Scan	Spectrum File	File ID	XCorr	Percolator q-Value	Percolator PEP
		FALSE	High	Sequest HT (A2)	Unambiguous	NKLNDLEDALQQAKEDLAR		1	1	P04264	P04264	2	3	0.6671	0	1	1	728.715	2184.13	2184.13	1.8	0.00131	HCD (High Energy Collision Dissociation)	MS2	29.1201	14.869	43.7581	48137	WQR_1_20190806.raw	F4	7.45	0	7.778e-05
		FALSE	High	Sequest HT (A2)	Unambiguous	NKLNDLEDALQQAKEDLAR		1	1	P04264	P04264	2	3	0.705	0	1	1	728.715	2184.13	2184.13	1.8	0.00131	HCD (High Energy Collision Dissociation)	MS2	16.2498	12.799	43.7567	48135	WQR_1_20190806.raw	F4	7.22	0	0.0002579
		FALSE	High	Sequest HT (A2)	Unambiguous	NKLNDLEDALQQAKEDLAR		1	1	P04264	P04264	2	3	0.6494	0	1	1	728.714	2184.13	2184.13	0.88	0.00064	HCD (High Energy Collision Dissociation)	MS2	26.3299	25.829	43.7268	48102	WQR_1_20190806.raw	F4	7.13	0	6.877e-06
		FALSE	High	Sequest HT (A2)	Unambiguous	NKLNDLEDALQQAKEDLAR		1	1	P04264	P04264	2	3	0.7115	0	1	1	728.714	2184.13	2184.13	1.55	0.00113	HCD (High Energy Collision Dissociation)	MS2	25.2996	5.12	43.8489	48242	WQR_1_20190806.raw	F4	6.1	0	2.147e-05
	FALSE	High	NKLNDLEDALQQAK		0.000394074	0	1	1	2	P04264	1	1599.83	High	0	0.0003012	4.08
		Checked	Confidence	Identifying Node	PSM Ambiguity	Annotated Sequence	Modifications	# Protein Groups	# Proteins	Master Protein Accessions	Protein Accessions	# Missed Cleavages	Charge	DeltaScore	DeltaCn	Rank	Search Engine Rank	m/z [Da]	MH+ [Da]	Theo. MH+ [Da]	DeltaM [ppm]	Deltam/z [Da]	Activation Type	MS Order	Isolation Interference [%]	Ion Inject Time [ms]	RT [min]	First Scan	Spectrum File	File ID	XCorr	Percolator q-Value	Percolator PEP
		FALSE	High	Sequest HT (A2)	Unambiguous	NKLNDLEDALQQAK		1	1	P04264	P04264	1	2	0.7696	0	1	1	800.422	1599.84	1599.83	1.37	0.00109	HCD (High Energy Collision Dissociation)	MS2	79.353	13.064	31.3588	33249	WQR_1_20190806.raw	F4	4.08	0	0.0003012
		FALSE	High	Sequest HT (A2)	Unambiguous	NKLNDLEDALQQAK		1	1	P04264	P04264	1	3	0.7033	0	1	1	533.95	1599.83	1599.83	0.56	0.0003	HCD (High Energy Collision Dissociation)	MS2	7.50195	3.905	31.4287	33339	WQR_1_20190806.raw	F4	3.64	0	0.01457
	FALSE	High	MSGECAPNVSVSVSTSHTTISGGGSR	1xCarbamidomethyl [C5]; 1xOxidation [M1]	1.26053e-05	0	1	1	2	P04264	0	2581.16	High	0	8.379e-06	6.38
		Checked	Confidence	Identifying Node	PSM Ambiguity	Annotated Sequence	Modifications	# Protein Groups	# Proteins	Master Protein Accessions	Protein Accessions	# Missed Cleavages	Charge	DeltaScore	DeltaCn	Rank	Search Engine Rank	m/z [Da]	MH+ [Da]	Theo. MH+ [Da]	DeltaM [ppm]	Deltam/z [Da]	Activation Type	MS Order	Isolation Interference [%]	Ion Inject Time [ms]	RT [min]	First Scan	Spectrum File	File ID	XCorr	Percolator q-Value	Percolator PEP
		FALSE	High	Sequest HT (A2)	Unambiguous	mSGEcAPNVSVSVSTSHTTISGGGSR	M1(Oxidation); C5(Carbamidomethyl)	1	1	P04264	P04264	0	3	0.7875	0	1	1	861.06	2581.17	2581.16	1.38	0.00118	HCD (High Energy Collision Dissociation)	MS2	74.9246	28.841	19.7694	19094	WQR_1_20190806.raw	F4	5.93	0	4.47e-05
		FALSE	High	Sequest HT (A2)	Unambiguous	mSGEcAPNVSVSVSTSHTTISGGGSR	M1(Oxidation); C5(Carbamidomethyl)	1	1	P04264	P04264	0	3	0.8041	0	1	1	861.06	2581.16	2581.16	1.02	0.00088	HCD (High Energy Collision Dissociation)	MS2	23.0673	23.742	19.7741	19099	WQR_1_20190806.raw	F4	6.38	0	8.379e-06
	FALSE	High	QISNLQQSISDAEQRGENALKDAK		0.00417424	0	1	1	2	P04264	2	2643.33	High	0	0.003531	5.26
		Checked	Confidence	Identifying Node	PSM Ambiguity	Annotated Sequence	Modifications	# Protein Groups	# Proteins	Master Protein Accessions	Protein Accessions	# Missed Cleavages	Charge	DeltaScore	DeltaCn	Rank	Search Engine Rank	m/z [Da]	MH+ [Da]	Theo. MH+ [Da]	DeltaM [ppm]	Deltam/z [Da]	Activation Type	MS Order	Isolation Interference [%]	Ion Inject Time [ms]	RT [min]	First Scan	Spectrum File	File ID	XCorr	Percolator q-Value	Percolator PEP
		FALSE	High	Sequest HT (A2)	Unambiguous	QISNLQQSISDAEQRGENALKDAK		1	1	P04264	P04264	2	4	0.6065	0	1	1	661.59	2643.34	2643.33	1.62	0.00107	HCD (High Energy Collision Dissociation)	MS2	23.4772	17.723	38.5325	41968	WQR_1_20190806.raw	F4	5.26	0	0.003531
		FALSE	High	Sequest HT (A2)	Unambiguous	QISNLQQSISDAEQRGENALKDAK		1	1	P04264	P04264	2	4	0.6193	0	1	1	661.591	2643.34	2643.33	2.73	0.0018	HCD (High Energy Collision Dissociation)	MS2	18.186	18.037	38.4675	41892	WQR_1_20190806.raw	F4	4.86	0	0.007359
	FALSE	High	QISNLQQSISDAEQR		0.000252496	0	1	1	4	P04264	0	1716.85	High	0	0.002679	4.38
		Checked	Confidence	Identifying Node	PSM Ambiguity	Annotated Sequence	Modifications	# Protein Groups	# Proteins	Master Protein Accessions	Protein Accessions	# Missed Cleavages	Charge	DeltaScore	DeltaCn	Rank	Search Engine Rank	m/z [Da]	MH+ [Da]	Theo. MH+ [Da]	DeltaM [ppm]	Deltam/z [Da]	Activation Type	MS Order	Isolation Interference [%]	Ion Inject Time [ms]	RT [min]	First Scan	Spectrum File	File ID	XCorr	Percolator q-Value	Percolator PEP
		FALSE	High	Sequest HT (A2)	Unambiguous	QISNLQQSISDAEQR		1	1	P04264	P04264	0	2	0.6667	0	1	1	858.927	1716.85	1716.85	-2.2	-0.00189	HCD (High Energy Collision Dissociation)	MS2	0	41.151	25.8254	26428	WQR_1_20190806.raw	F4	4.38	0	0.002679
		FALSE	High	Sequest HT (A2)	Unambiguous	QISNLQQSISDAEQR		1	1	P04264	P04264	0	2	0.7098	0	1	1	858.931	1716.85	1716.85	1.64	0.00141	HCD (High Energy Collision Dissociation)	MS2	0	4.359	25.8698	26482	WQR_1_20190806.raw	F4	4.17	0	0.00019
		FALSE	High	Sequest HT (A2)	Unambiguous	QISNLQQSISDAEQR		1	1	P04264	P04264	0	2	0.7333	0	1	1	858.931	1716.85	1716.85	1.64	0.00141	HCD (High Energy Collision Dissociation)	MS2	0	6.34	25.8716	26485	WQR_1_20190806.raw	F4	3.9	0	0.009439
		FALSE	High	Sequest HT (A2)	Unambiguous	QISNLQQSISDAEQR		1	1	P04264	P04264	0	2	0.6891	0	1	1	858.93	1716.85	1716.85	1	0.00086	HCD (High Energy Collision Dissociation)	MS2	29.6812	38.294	25.9162	26542	WQR_1_20190806.raw	F4	3.57	0.0007925	0.03721
	FALSE	High	YEELQITAGR		0.00797349	0	1	2	2	P04264	0	1179.6	High	0	0.006911	3.05
		Checked	Confidence	Identifying Node	PSM Ambiguity	Annotated Sequence	Modifications	# Protein Groups	# Proteins	Master Protein Accessions	Protein Accessions	# Missed Cleavages	Charge	DeltaScore	DeltaCn	Rank	Search Engine Rank	m/z [Da]	MH+ [Da]	Theo. MH+ [Da]	DeltaM [ppm]	Deltam/z [Da]	Activation Type	MS Order	Isolation Interference [%]	Ion Inject Time [ms]	RT [min]	First Scan	Spectrum File	File ID	XCorr	Percolator q-Value	Percolator PEP
		FALSE	High	Sequest HT (A2)	Unambiguous	YEELQITAGR		1	2	P04264	P04264; P04259	0	2	0.6525	0	1	1	590.304	1179.6	1179.6	-0.14	-8e-05	HCD (High Energy Collision Dissociation)	MS2	56.8897	45	21.2869	20936	WQR_1_20190806.raw	F4	3.05	0	0.006911
		FALSE	High	Sequest HT (A2)	Unambiguous	YEELQITAGR		1	2	P04264	P04264; P04259	0	2	0.6141	0	1	1	590.303	1179.6	1179.6	-1.27	-0.00075	HCD (High Energy Collision Dissociation)	MS2	0	45	21.3068	20957	WQR_1_20190806.raw	F4	2.98	0.0007925	0.0457
	FALSE	High	FLEQQNQVLQTK		0.00230749	0	2	3	1	P35908; P04264	0	1475.79	High	0	0.001903	3.79
		Checked	Confidence	Identifying Node	PSM Ambiguity	Annotated Sequence	Modifications	# Protein Groups	# Proteins	Master Protein Accessions	Protein Accessions	# Missed Cleavages	Charge	DeltaScore	DeltaCn	Rank	Search Engine Rank	m/z [Da]	MH+ [Da]	Theo. MH+ [Da]	DeltaM [ppm]	Deltam/z [Da]	Activation Type	MS Order	Isolation Interference [%]	Ion Inject Time [ms]	RT [min]	First Scan	Spectrum File	File ID	XCorr	Percolator q-Value	Percolator PEP
		FALSE	High	Sequest HT (A2)	Unambiguous	FLEQQNQVLQTK		2	3	P35908; P04264	Q7Z794; P35908; P04264	0	2	0.7203	0	1	1	738.397	1475.79	1475.79	0.95	0.0007	HCD (High Energy Collision Dissociation)	MS2	11.5477	28.499	20.9631	20527	WQR_1_20190806.raw	F4	3.79	0	0.001903
	FALSE	High	GGGGGGYGSGGSSYGSGGGSYGSGGGGGGGR		1.39553e-05	0	1	1	1	P04264	0	2383.95	High	0	9.307e-06	7.31
		Checked	Confidence	Identifying Node	PSM Ambiguity	Annotated Sequence	Modifications	# Protein Groups	# Proteins	Master Protein Accessions	Protein Accessions	# Missed Cleavages	Charge	DeltaScore	DeltaCn	Rank	Search Engine Rank	m/z [Da]	MH+ [Da]	Theo. MH+ [Da]	DeltaM [ppm]	Deltam/z [Da]	Activation Type	MS Order	Isolation Interference [%]	Ion Inject Time [ms]	RT [min]	First Scan	Spectrum File	File ID	XCorr	Percolator q-Value	Percolator PEP
		FALSE	High	Sequest HT (A2)	Unambiguous	GGGGGGYGSGGSSYGSGGGSYGSGGGGGGGR		1	1	P04264	P04264	0	2	0.8427	0	1	1	1192.48	2383.96	2383.95	1.68	0.00201	HCD (High Energy Collision Dissociation)	MS2	0	39.922	12.3775	10496	WQR_1_20190806.raw	F4	7.31	0	9.307e-06
	FALSE	High	GSGGGSSGGSIGGR		0.00613465	0	1	1	1	P04264	0	1092.5	High	0	0.00526	3.77
		Checked	Confidence	Identifying Node	PSM Ambiguity	Annotated Sequence	Modifications	# Protein Groups	# Proteins	Master Protein Accessions	Protein Accessions	# Missed Cleavages	Charge	DeltaScore	DeltaCn	Rank	Search Engine Rank	m/z [Da]	MH+ [Da]	Theo. MH+ [Da]	DeltaM [ppm]	Deltam/z [Da]	Activation Type	MS Order	Isolation Interference [%]	Ion Inject Time [ms]	RT [min]	First Scan	Spectrum File	File ID	XCorr	Percolator q-Value	Percolator PEP
		FALSE	High	Sequest HT (A2)	Unambiguous	GSGGGSSGGSIGGR		1	1	P04264	P04264	0	2	0.8037	0	1	1	546.756	1092.5	1092.5	1.69	0.00092	HCD (High Energy Collision Dissociation)	MS2	0	32.594	7.1728	4387	WQR_1_20190806.raw	F4	3.77	0	0.00526
	FALSE	High	FLEQQNQVLQTKWELLQQVDTSTR		0.000555535	0	1	1	1	P04264	1	2932.52	High	0	0.0004316	1.8
		Checked	Confidence	Identifying Node	PSM Ambiguity	Annotated Sequence	Modifications	# Protein Groups	# Proteins	Master Protein Accessions	Protein Accessions	# Missed Cleavages	Charge	DeltaScore	DeltaCn	Rank	Search Engine Rank	m/z [Da]	MH+ [Da]	Theo. MH+ [Da]	DeltaM [ppm]	Deltam/z [Da]	Activation Type	MS Order	Isolation Interference [%]	Ion Inject Time [ms]	RT [min]	First Scan	Spectrum File	File ID	XCorr	Percolator q-Value	Percolator PEP
		FALSE	High	Sequest HT (A2)	Unambiguous	FLEQQNQVLQTKWELLQQVDTSTR		1	1	P04264	P04264	1	3	0.5833	0	1	1	978.177	2932.52	2932.52	0.24	0.00023	HCD (High Energy Collision Dissociation)	MS2	90.3368	5.66	42.2142	46328	WQR_1_20190806.raw	F4	1.8	0	0.0004316
	FALSE	High	GSYGSGGSSYGSGGGSYGSGGGGGGHGSYGSGSSSGGYR		8.98989e-08	0	1	1	2	P04264	0	3312.31	High	0	4.879e-08	8.74
		Checked	Confidence	Identifying Node	PSM Ambiguity	Annotated Sequence	Modifications	# Protein Groups	# Proteins	Master Protein Accessions	Protein Accessions	# Missed Cleavages	Charge	DeltaScore	DeltaCn	Rank	Search Engine Rank	m/z [Da]	MH+ [Da]	Theo. MH+ [Da]	DeltaM [ppm]	Deltam/z [Da]	Activation Type	MS Order	Isolation Interference [%]	Ion Inject Time [ms]	RT [min]	First Scan	Spectrum File	File ID	XCorr	Percolator q-Value	Percolator PEP
		FALSE	High	Sequest HT (A2)	Unambiguous	GSYGSGGSSYGSGGGSYGSGGGGGGHGSYGSGSSSGGYR		1	1	P04264	P04264	0	3	0.737	0	1	1	1104.78	3312.31	3312.31	1.94	0.00214	HCD (High Energy Collision Dissociation)	MS2	0	45	14.2091	12652	WQR_1_20190806.raw	F4	8.29	0	3.938e-06
		FALSE	High	Sequest HT (A2)	Unambiguous	GSYGSGGSSYGSGGGSYGSGGGGGGHGSYGSGSSSGGYR		1	1	P04264	P04264	0	3	0.8032	0	1	1	1104.78	3312.31	3312.31	1.94	0.00214	HCD (High Energy Collision Dissociation)	MS2	0	45	14.2107	12654	WQR_1_20190806.raw	F4	8.74	0	4.879e-08
	FALSE	High	FSSCGGGGGSFGAGGGFGSR	1xCarbamidomethyl [C4]	5.17201e-05	0	1	1	3	P04264	0	1765.73	High	0	3.65e-05	5.1
		Checked	Confidence	Identifying Node	PSM Ambiguity	Annotated Sequence	Modifications	# Protein Groups	# Proteins	Master Protein Accessions	Protein Accessions	# Missed Cleavages	Charge	DeltaScore	DeltaCn	Rank	Search Engine Rank	m/z [Da]	MH+ [Da]	Theo. MH+ [Da]	DeltaM [ppm]	Deltam/z [Da]	Activation Type	MS Order	Isolation Interference [%]	Ion Inject Time [ms]	RT [min]	First Scan	Spectrum File	File ID	XCorr	Percolator q-Value	Percolator PEP
		FALSE	High	Sequest HT (A2)	Unambiguous	FSScGGGGGSFGAGGGFGSR	C4(Carbamidomethyl)	1	1	P04264	P04264	0	2	0.8294	0	1	1	883.373	1765.74	1765.73	2.26	0.00199	HCD (High Energy Collision Dissociation)	MS2	5.14961	7.416	22.2006	22015	WQR_1_20190806.raw	F4	5.1	0	3.65e-05
		FALSE	High	Sequest HT (A2)	Unambiguous	FSScGGGGGSFGAGGGFGSR	C4(Carbamidomethyl)	1	1	P04264	P04264	0	2	0.8184	0	1	1	883.373	1765.74	1765.73	2.26	0.00199	HCD (High Energy Collision Dissociation)	MS2	3.99825	3.938	22.2012	22016	WQR_1_20190806.raw	F4	4.13	0	0.0001618
		FALSE	High	Sequest HT (A2)	Unambiguous	FSScGGGGGSFGAGGGFGSR	C4(Carbamidomethyl)	1	1	P04264	P04264	0	2	0.8206	0	1	1	883.372	1765.74	1765.73	1.15	0.00102	HCD (High Energy Collision Dissociation)	MS2	0	16.169	22.2683	22105	WQR_1_20190806.raw	F4	4.85	0	0.0001521
	FALSE	High	AEAESLYQSK		0.0473569	0.00152962	1	1	1	P04264	0	1125.54	High	0.0007925	0.04403	2.73
		Checked	Confidence	Identifying Node	PSM Ambiguity	Annotated Sequence	Modifications	# Protein Groups	# Proteins	Master Protein Accessions	Protein Accessions	# Missed Cleavages	Charge	DeltaScore	DeltaCn	Rank	Search Engine Rank	m/z [Da]	MH+ [Da]	Theo. MH+ [Da]	DeltaM [ppm]	Deltam/z [Da]	Activation Type	MS Order	Isolation Interference [%]	Ion Inject Time [ms]	RT [min]	First Scan	Spectrum File	File ID	XCorr	Percolator q-Value	Percolator PEP
		FALSE	High	Sequest HT (A2)	Unambiguous	AEAESLYQSK		1	1	P04264	P04264	0	2	0.696	0	1	1	563.276	1125.55	1125.54	2.86	0.00161	HCD (High Energy Collision Dissociation)	MS2	20.4171	20.063	12.8463	11045	WQR_1_20190806.raw	F4	2.73	0.0007925	0.04403
	FALSE	High	NMQDMVEDYR	1xOxidation [M5]	0.0395714	0.00152962	1	1	1	P04264	0	1316.52	High	0.0007925	0.03656	2.07
		Checked	Confidence	Identifying Node	PSM Ambiguity	Annotated Sequence	Modifications	# Protein Groups	# Proteins	Master Protein Accessions	Protein Accessions	# Missed Cleavages	Charge	DeltaScore	DeltaCn	Rank	Search Engine Rank	m/z [Da]	MH+ [Da]	Theo. MH+ [Da]	DeltaM [ppm]	Deltam/z [Da]	Activation Type	MS Order	Isolation Interference [%]	Ion Inject Time [ms]	RT [min]	First Scan	Spectrum File	File ID	XCorr	Percolator q-Value	Percolator PEP
		FALSE	High	Sequest HT (A2)	Unambiguous	NMQDmVEDYR	M5(Oxidation)	1	1	P04264	P04264	0	2	0.4058	0	1	1	658.767	1316.53	1316.52	1.13	0.00074	HCD (High Energy Collision Dissociation)	MS2	52.4312	45	18.531	17630	WQR_1_20190806.raw	F4	2.07	0.0007925	0.03656
	FALSE	High	NMQDMVEDYR	2xOxidation [M2; M5]	0.041262	0.00152962	1	1	2	P04264	0	1332.52	High	0.0007925	0.03825	2.63
		Checked	Confidence	Identifying Node	PSM Ambiguity	Annotated Sequence	Modifications	# Protein Groups	# Proteins	Master Protein Accessions	Protein Accessions	# Missed Cleavages	Charge	DeltaScore	DeltaCn	Rank	Search Engine Rank	m/z [Da]	MH+ [Da]	Theo. MH+ [Da]	DeltaM [ppm]	Deltam/z [Da]	Activation Type	MS Order	Isolation Interference [%]	Ion Inject Time [ms]	RT [min]	First Scan	Spectrum File	File ID	XCorr	Percolator q-Value	Percolator PEP
		FALSE	High	Sequest HT (A2)	Unambiguous	NmQDmVEDYR	M2(Oxidation); M5(Oxidation)	1	1	P04264	P04264	0	2	0.6312	0	1	1	666.761	1332.52	1332.52	-2.86	-0.0019	HCD (High Energy Collision Dissociation)	MS2	0	45	12.5247	10676	WQR_1_20190806.raw	F4	2.63	0.0007925	0.03825
		FALSE	High	Sequest HT (A2)	Unambiguous	NmQDmVEDYR	M2(Oxidation); M5(Oxidation)	1	1	P04264	P04264	0	2	0.522	0	1	1	666.762	1332.52	1332.52	-2.12	-0.00141	HCD (High Energy Collision Dissociation)	MS2	0	45	12.5625	10717	WQR_1_20190806.raw	F4	2.05	0.002731	0.1591
	FALSE	High	NMQDMVEDYR		0.035191	0.00152962	1	1	1	P04264	0	1300.53	High	0.0007925	0.03234	3.08
		Checked	Confidence	Identifying Node	PSM Ambiguity	Annotated Sequence	Modifications	# Protein Groups	# Proteins	Master Protein Accessions	Protein Accessions	# Missed Cleavages	Charge	DeltaScore	DeltaCn	Rank	Search Engine Rank	m/z [Da]	MH+ [Da]	Theo. MH+ [Da]	DeltaM [ppm]	Deltam/z [Da]	Activation Type	MS Order	Isolation Interference [%]	Ion Inject Time [ms]	RT [min]	First Scan	Spectrum File	File ID	XCorr	Percolator q-Value	Percolator PEP
		FALSE	High	Sequest HT (A2)	Unambiguous	NMQDMVEDYR		1	1	P04264	P04264	0	2	0.6916	0	1	1	650.77	1300.53	1300.53	2.77	0.0018	HCD (High Energy Collision Dissociation)	MS2	46.9659	38.468	25.7388	26323	WQR_1_20190806.raw	F4	3.08	0.0007925	0.03234
	FALSE	High	DYQELMNTK	1xOxidation [M6]	0.0771661	0.00152962	1	1	1	P04264	0	1157.51	High	0.0007925	0.07305	2.02
		Checked	Confidence	Identifying Node	PSM Ambiguity	Annotated Sequence	Modifications	# Protein Groups	# Proteins	Master Protein Accessions	Protein Accessions	# Missed Cleavages	Charge	DeltaScore	DeltaCn	Rank	Search Engine Rank	m/z [Da]	MH+ [Da]	Theo. MH+ [Da]	DeltaM [ppm]	Deltam/z [Da]	Activation Type	MS Order	Isolation Interference [%]	Ion Inject Time [ms]	RT [min]	First Scan	Spectrum File	File ID	XCorr	Percolator q-Value	Percolator PEP
		FALSE	High	Sequest HT (A2)	Unambiguous	DYQELmNTK	M6(Oxidation)	1	1	P04264	P04264	0	2	0.5495	0	1	1	579.261	1157.51	1157.51	0.54	0.00031	HCD (High Energy Collision Dissociation)	MS2	36.997	45	12.9891	11215	WQR_1_20190806.raw	F4	2.02	0.0007925	0.07305
	FALSE	High	NKYEDEINKR		0.0354874	0.00152962	3	6	1	P04264; P02538; P13647	2	1308.65	High	0.0007925	0.03265	3.52
		Checked	Confidence	Identifying Node	PSM Ambiguity	Annotated Sequence	Modifications	# Protein Groups	# Proteins	Master Protein Accessions	Protein Accessions	# Missed Cleavages	Charge	DeltaScore	DeltaCn	Rank	Search Engine Rank	m/z [Da]	MH+ [Da]	Theo. MH+ [Da]	DeltaM [ppm]	Deltam/z [Da]	Activation Type	MS Order	Isolation Interference [%]	Ion Inject Time [ms]	RT [min]	First Scan	Spectrum File	File ID	XCorr	Percolator q-Value	Percolator PEP
		FALSE	High	Sequest HT (A2)	Unambiguous	NKYEDEINKR		3	6	P04264; P02538; P13647	P04264; P04259; P02538; P48668; P05787; P13647	2	3	0.7102	0	1	1	436.89	1308.66	1308.65	0.94	0.00041	HCD (High Energy Collision Dissociation)	MS2	18.9185	3.695	9.9266	7648	WQR_1_20190806.raw	F4	3.52	0.0007925	0.03265
	FALSE	High	THNLEPYFESFINNLRR		0.0346054	0.00152962	1	1	2	P04264	1	2150.08	High	0.001475	0.08621	3.38
		Checked	Confidence	Identifying Node	PSM Ambiguity	Annotated Sequence	Modifications	# Protein Groups	# Proteins	Master Protein Accessions	Protein Accessions	# Missed Cleavages	Charge	DeltaScore	DeltaCn	Rank	Search Engine Rank	m/z [Da]	MH+ [Da]	Theo. MH+ [Da]	DeltaM [ppm]	Deltam/z [Da]	Activation Type	MS Order	Isolation Interference [%]	Ion Inject Time [ms]	RT [min]	First Scan	Spectrum File	File ID	XCorr	Percolator q-Value	Percolator PEP
		FALSE	High	Sequest HT (A2)	Unambiguous	THNLEPYFESFINNLRR		1	1	P04264	P04264	1	3	0.6378	0	1	1	717.365	2150.08	2150.08	0.81	0.00058	HCD (High Energy Collision Dissociation)	MS2	28.3615	15.254	45.4571	50123	WQR_1_20190806.raw	F4	2.54	0.0007925	0.03182
		FALSE	High	Sequest HT (A2)	Unambiguous	THNLEPYFESFINNLRR		1	1	P04264	P04264	1	3	0.645	0	1	1	717.366	2150.08	2150.08	3.11	0.00223	HCD (High Energy Collision Dissociation)	MS2	16.8971	35.619	45.4335	50092	WQR_1_20190806.raw	F4	3.38	0.001475	0.08621
	FALSE	High	YEDEINKR		0.113577	0.00267473	4	11	1	P35908; P04264; P02538; P13647	1	1066.52	High	0.001475	0.1088	2.3
		Checked	Confidence	Identifying Node	PSM Ambiguity	Annotated Sequence	Modifications	# Protein Groups	# Proteins	Master Protein Accessions	Protein Accessions	# Missed Cleavages	Charge	DeltaScore	DeltaCn	Rank	Search Engine Rank	m/z [Da]	MH+ [Da]	Theo. MH+ [Da]	DeltaM [ppm]	Deltam/z [Da]	Activation Type	MS Order	Isolation Interference [%]	Ion Inject Time [ms]	RT [min]	First Scan	Spectrum File	File ID	XCorr	Percolator q-Value	Percolator PEP
		FALSE	High	Sequest HT (A2)	Unambiguous	YEDEINKR		4	11	P35908; P04264; P02538; P13647	Q7Z794; P35908; P04264; P04259; P02538; Q01546; O95678; P48668; P12035; P05787; P13647	1	2	0.687	0	1	1	533.762	1066.52	1066.52	1.07	0.00057	HCD (High Energy Collision Dissociation)	MS2	0	7.963	8.5711	6052	WQR_1_20190806.raw	F4	2.3	0.001475	0.1088
	FALSE	High	DVDGAYMTK	1xOxidation [M7]	0.118721	0.00267473	1	1	1	P04264	0	1015.44	High	0.001475	0.1139	1.7
		Checked	Confidence	Identifying Node	PSM Ambiguity	Annotated Sequence	Modifications	# Protein Groups	# Proteins	Master Protein Accessions	Protein Accessions	# Missed Cleavages	Charge	DeltaScore	DeltaCn	Rank	Search Engine Rank	m/z [Da]	MH+ [Da]	Theo. MH+ [Da]	DeltaM [ppm]	Deltam/z [Da]	Activation Type	MS Order	Isolation Interference [%]	Ion Inject Time [ms]	RT [min]	First Scan	Spectrum File	File ID	XCorr	Percolator q-Value	Percolator PEP
		FALSE	High	Sequest HT (A2)	Unambiguous	DVDGAYmTK	M7(Oxidation)	1	1	P04264	P04264	0	2	0.5118	0	1	1	508.225	1015.44	1015.44	2.01	0.00102	HCD (High Energy Collision Dissociation)	MS2	22.4029	13.191	9.7581	7460	WQR_1_20190806.raw	F4	1.7	0.001475	0.1139
	FALSE	High	IEISELNR		0.150283	0.00381703	2	2	1	P35908; P04264	0	973.531	High	0.002731	0.1457	2.22
		Checked	Confidence	Identifying Node	PSM Ambiguity	Annotated Sequence	Modifications	# Protein Groups	# Proteins	Master Protein Accessions	Protein Accessions	# Missed Cleavages	Charge	DeltaScore	DeltaCn	Rank	Search Engine Rank	m/z [Da]	MH+ [Da]	Theo. MH+ [Da]	DeltaM [ppm]	Deltam/z [Da]	Activation Type	MS Order	Isolation Interference [%]	Ion Inject Time [ms]	RT [min]	First Scan	Spectrum File	File ID	XCorr	Percolator q-Value	Percolator PEP
		FALSE	High	Sequest HT (A2)	Unambiguous	IEISELNR		2	2	P35908; P04264	P35908; P04264	0	2	0.1937	0	1	1	487.269	973.532	973.531	0.33	0.00016	HCD (High Energy Collision Dissociation)	MS2	19.8642	6.571	20.7986	20316	WQR_1_20190806.raw	F4	2.22	0.002731	0.1457
	FALSE	High	SLVNLGGSK		0.163949	0.00381703	1	1	1	P04264	0	874.499	High	0.002731	0.1592	2.01
		Checked	Confidence	Identifying Node	PSM Ambiguity	Annotated Sequence	Modifications	# Protein Groups	# Proteins	Master Protein Accessions	Protein Accessions	# Missed Cleavages	Charge	DeltaScore	DeltaCn	Rank	Search Engine Rank	m/z [Da]	MH+ [Da]	Theo. MH+ [Da]	DeltaM [ppm]	Deltam/z [Da]	Activation Type	MS Order	Isolation Interference [%]	Ion Inject Time [ms]	RT [min]	First Scan	Spectrum File	File ID	XCorr	Percolator q-Value	Percolator PEP
		FALSE	High	Sequest HT (A2)	Unambiguous	SLVNLGGSK		1	1	P04264	P04264	0	2	0.5473	0	1	1	437.754	874.5	874.499	0.69	0.0003	HCD (High Energy Collision Dissociation)	MS2	0	1.189	18.0733	17109	WQR_1_20190806.raw	F4	2.01	0.002731	0.1592
	FALSE	High	AQYEDIAQK		0.166553	0.00381703	1	1	1	P04264	0	1065.52	High	0.002731	0.1615	2.5
		Checked	Confidence	Identifying Node	PSM Ambiguity	Annotated Sequence	Modifications	# Protein Groups	# Proteins	Master Protein Accessions	Protein Accessions	# Missed Cleavages	Charge	DeltaScore	DeltaCn	Rank	Search Engine Rank	m/z [Da]	MH+ [Da]	Theo. MH+ [Da]	DeltaM [ppm]	Deltam/z [Da]	Activation Type	MS Order	Isolation Interference [%]	Ion Inject Time [ms]	RT [min]	First Scan	Spectrum File	File ID	XCorr	Percolator q-Value	Percolator PEP
		FALSE	High	Sequest HT (A2)	Unambiguous	AQYEDIAQK		1	1	P04264	P04264	0	2	0.672	0	1	1	533.264	1065.52	1065.52	0.16	9e-05	HCD (High Energy Collision Dissociation)	MS2	20.5549	18.732	12.4907	10635	WQR_1_20190806.raw	F4	2.5	0.002731	0.1615
	FALSE	High	NKYEDEINK		0.196257	0.00497177	3	7	1	P04264; P02538; P13647	1	1152.55	High	0.003364	0.1915	2.15
		Checked	Confidence	Identifying Node	PSM Ambiguity	Annotated Sequence	Modifications	# Protein Groups	# Proteins	Master Protein Accessions	Protein Accessions	# Missed Cleavages	Charge	DeltaScore	DeltaCn	Rank	Search Engine Rank	m/z [Da]	MH+ [Da]	Theo. MH+ [Da]	DeltaM [ppm]	Deltam/z [Da]	Activation Type	MS Order	Isolation Interference [%]	Ion Inject Time [ms]	RT [min]	First Scan	Spectrum File	File ID	XCorr	Percolator q-Value	Percolator PEP
		FALSE	High	Sequest HT (A2)	Unambiguous	NKYEDEINK		3	7	P04264; P02538; P13647	Q5XKE5; P04264; P04259; P02538; P48668; P05787; P13647	1	2	0.6093	0	1	1	576.78	1152.55	1152.55	0.43	0.00025	HCD (High Energy Collision Dissociation)	MS2	0	45	10.0349	7780	WQR_1_20190806.raw	F4	2.15	0.003364	0.1915
	FALSE	High	LLRDYQELMNTK	1xOxidation [M9]	0.222777	0.00596215	1	1	1	P04264	1	1539.78	High	0.00393	0.2182	2.13
		Checked	Confidence	Identifying Node	PSM Ambiguity	Annotated Sequence	Modifications	# Protein Groups	# Proteins	Master Protein Accessions	Protein Accessions	# Missed Cleavages	Charge	DeltaScore	DeltaCn	Rank	Search Engine Rank	m/z [Da]	MH+ [Da]	Theo. MH+ [Da]	DeltaM [ppm]	Deltam/z [Da]	Activation Type	MS Order	Isolation Interference [%]	Ion Inject Time [ms]	RT [min]	First Scan	Spectrum File	File ID	XCorr	Percolator q-Value	Percolator PEP
		FALSE	High	Sequest HT (A2)	Unambiguous	LLRDYQELmNTK	M9(Oxidation)	1	1	P04264	P04264	1	3	0.4131	0	1	1	513.933	1539.79	1539.78	1.38	0.00071	HCD (High Energy Collision Dissociation)	MS2	84.7551	45	18.6913	17807	WQR_1_20190806.raw	F4	2.13	0.00393	0.2182
	FALSE	High	DVDGAYMTK		0.243926	0.00705895	1	1	1	P04264	0	999.445	High	0.00453	0.239	1.76
		Checked	Confidence	Identifying Node	PSM Ambiguity	Annotated Sequence	Modifications	# Protein Groups	# Proteins	Master Protein Accessions	Protein Accessions	# Missed Cleavages	Charge	DeltaScore	DeltaCn	Rank	Search Engine Rank	m/z [Da]	MH+ [Da]	Theo. MH+ [Da]	DeltaM [ppm]	Deltam/z [Da]	Activation Type	MS Order	Isolation Interference [%]	Ion Inject Time [ms]	RT [min]	First Scan	Spectrum File	File ID	XCorr	Percolator q-Value	Percolator PEP
		FALSE	High	Sequest HT (A2)	Unambiguous	DVDGAYMTK		1	1	P04264	P04264	0	2	0.4716	0	1	1	500.226	999.445	999.445	0.13	6e-05	HCD (High Energy Collision Dissociation)	MS2	8.97706	17.897	13.7232	12091	WQR_1_20190806.raw	F4	1.76	0.00453	0.239
	FALSE	High	KDVDGAYMTK		0.246683	0.00705895	1	1	1	P04264	1	1127.54	High	0.00453	0.2418	3.04
		Checked	Confidence	Identifying Node	PSM Ambiguity	Annotated Sequence	Modifications	# Protein Groups	# Proteins	Master Protein Accessions	Protein Accessions	# Missed Cleavages	Charge	DeltaScore	DeltaCn	Rank	Search Engine Rank	m/z [Da]	MH+ [Da]	Theo. MH+ [Da]	DeltaM [ppm]	Deltam/z [Da]	Activation Type	MS Order	Isolation Interference [%]	Ion Inject Time [ms]	RT [min]	First Scan	Spectrum File	File ID	XCorr	Percolator q-Value	Percolator PEP
		FALSE	High	Sequest HT (A2)	Unambiguous	KDVDGAYMTK		1	1	P04264	P04264	1	2	0.3618	0	1	1	564.275	1127.54	1127.54	2.66	0.0015	HCD (High Energy Collision Dissociation)	MS2	31.9981	45	9.7631	7466	WQR_1_20190806.raw	F4	3.04	0.00453	0.2418
FALSE	High	Master Protein	P13645	Keratin, type I cytoskeletal 10 OS=Homo sapiens OX=9606 GN=KRT10 PE=1 SV=6	0	92.719	54	27	69	23	1	584	58.8	5.21	314.27	27
	Checked	Confidence	Sequence	Modifications	Qvality PEP	Qvality q-value	# Protein Groups	# Proteins	# PSMs	Master Protein Accessions	# Missed Cleavages	Theo. MH+ [Da]	Confidence (by Search Engine): Sequest HT	Percolator q-Value (by Search Engine): Sequest HT	Percolator PEP (by Search Engine): Sequest HT	XCorr (by Search Engine): Sequest HT
	FALSE	High	QSVEADINGLR		0.0183231	0	2	3	2	P13645; P13646	0	1201.62	High	0	0.01648	3.64
		Checked	Confidence	Identifying Node	PSM Ambiguity	Annotated Sequence	Modifications	# Protein Groups	# Proteins	Master Protein Accessions	Protein Accessions	# Missed Cleavages	Charge	DeltaScore	DeltaCn	Rank	Search Engine Rank	m/z [Da]	MH+ [Da]	Theo. MH+ [Da]	DeltaM [ppm]	Deltam/z [Da]	Activation Type	MS Order	Isolation Interference [%]	Ion Inject Time [ms]	RT [min]	First Scan	Spectrum File	File ID	XCorr	Percolator q-Value	Percolator PEP
		FALSE	High	Sequest HT (A2)	Unambiguous	QSVEADINGLR		2	3	P13645; P13646	Q2M2I5; P13645; P13646	0	2	0.5797	0	1	1	601.312	1201.62	1201.62	-0.23	-0.00014	HCD (High Energy Collision Dissociation)	MS2	0	41.741	23.6043	23742	WQR_1_20190806.raw	F4	3.64	0	0.01648
		FALSE	High	Sequest HT (A2)	Unambiguous	QSVEADINGLR		2	3	P13645; P13646	Q2M2I5; P13645; P13646	0	2	0.5633	0	1	1	601.314	1201.62	1201.62	2.52	0.00151	HCD (High Energy Collision Dissociation)	MS2	27.1747	5.404	23.6768	23833	WQR_1_20190806.raw	F4	3.16	0.0007925	0.05706
	FALSE	High	QSLEASLAETEGR		0.00207563	0	1	1	1	P13645	0	1390.68	High	0	0.001704	4
		Checked	Confidence	Identifying Node	PSM Ambiguity	Annotated Sequence	Modifications	# Protein Groups	# Proteins	Master Protein Accessions	Protein Accessions	# Missed Cleavages	Charge	DeltaScore	DeltaCn	Rank	Search Engine Rank	m/z [Da]	MH+ [Da]	Theo. MH+ [Da]	DeltaM [ppm]	Deltam/z [Da]	Activation Type	MS Order	Isolation Interference [%]	Ion Inject Time [ms]	RT [min]	First Scan	Spectrum File	File ID	XCorr	Percolator q-Value	Percolator PEP
		FALSE	High	Sequest HT (A2)	Unambiguous	QSLEASLAETEGR		1	1	P13645	P13645	0	2	0.7475	0	1	1	695.845	1390.68	1390.68	0.94	0.00066	HCD (High Energy Collision Dissociation)	MS2	0	4	23.8377	24033	WQR_1_20190806.raw	F4	4	0	0.001704
	FALSE	High	SGGGGGGGGCGGGGGVSSLR	1xCarbamidomethyl [C10]	0.000405944	0	1	1	2	P13645	0	1549.68	High	0	0.0003108	4.96
		Checked	Confidence	Identifying Node	PSM Ambiguity	Annotated Sequence	Modifications	# Protein Groups	# Proteins	Master Protein Accessions	Protein Accessions	# Missed Cleavages	Charge	DeltaScore	DeltaCn	Rank	Search Engine Rank	m/z [Da]	MH+ [Da]	Theo. MH+ [Da]	DeltaM [ppm]	Deltam/z [Da]	Activation Type	MS Order	Isolation Interference [%]	Ion Inject Time [ms]	RT [min]	First Scan	Spectrum File	File ID	XCorr	Percolator q-Value	Percolator PEP
		FALSE	High	Sequest HT (A2)	Unambiguous	SGGGGGGGGcGGGGGVSSLR	C10(Carbamidomethyl)	1	1	P13645	P13645	0	2	0.7419	0	1	1	775.343	1549.68	1549.68	1.17	0.00091	HCD (High Energy Collision Dissociation)	MS2	12.7045	45	11.0988	9001	WQR_1_20190806.raw	F4	4.96	0	0.0003108
		FALSE	High	Sequest HT (A2)	Unambiguous	SGGGGGGGGcGGGGGVSSLR	C10(Carbamidomethyl)	1	1	P13645	P13645	0	2	0.735	0	1	1	775.342	1549.68	1549.68	0.22	0.00017	HCD (High Energy Collision Dissociation)	MS2		45	11.1509	9066	WQR_1_20190806.raw	F4	4.49	0	0.00045
	FALSE	High	SKELTTEIDNNIEQISSYK		0.00151059	0	1	1	6	P13645	1	2212.1	High	0	0.0107	4.82
		Checked	Confidence	Identifying Node	PSM Ambiguity	Annotated Sequence	Modifications	# Protein Groups	# Proteins	Master Protein Accessions	Protein Accessions	# Missed Cleavages	Charge	DeltaScore	DeltaCn	Rank	Search Engine Rank	m/z [Da]	MH+ [Da]	Theo. MH+ [Da]	DeltaM [ppm]	Deltam/z [Da]	Activation Type	MS Order	Isolation Interference [%]	Ion Inject Time [ms]	RT [min]	First Scan	Spectrum File	File ID	XCorr	Percolator q-Value	Percolator PEP
		FALSE	High	Sequest HT (A2)	Unambiguous	SKELTTEIDNNIEQISSYK		1	1	P13645	P13645	1	3	0.7425	0	1	1	738.038	2212.1	2212.1	0.38	0.00028	HCD (High Energy Collision Dissociation)	MS2	33.3978	5.064	35.5174	38401	WQR_1_20190806.raw	F4	4.31	0	0.001222
		FALSE	High	Sequest HT (A2)	Unambiguous	SKELTTEIDNNIEQISSYK		1	1	P13645	P13645	1	3	0.7099	0	1	1	738.038	2212.1	2212.1	0.3	0.00022	HCD (High Energy Collision Dissociation)	MS2	34.1508	7.31	35.5337	38418	WQR_1_20190806.raw	F4	4.55	0	0.003063
		FALSE	High	Sequest HT (A2)	Unambiguous	SKELTTEIDNNIEQISSYK		1	1	P13645	P13645	1	2	0.7158	0	1	1	1106.56	2212.1	2212.1	2.32	0.00256	HCD (High Energy Collision Dissociation)	MS2	27.5535	45	35.5632	38453	WQR_1_20190806.raw	F4	4.75	0	0.001571
		FALSE	High	Sequest HT (A2)	Unambiguous	SKELTTEIDNNIEQISSYK		1	1	P13645	P13645	1	3	0.6245	0	1	1	738.037	2212.1	2212.1	-1.03	-0.00076	HCD (High Energy Collision Dissociation)	MS2	19.7155	14.773	35.4439	38317	WQR_1_20190806.raw	F4	4.82	0	0.0107
		FALSE	High	Sequest HT (A2)	Unambiguous	SKELTTEIDNNIEQISSYK		1	1	P13645	P13645	1	3	0.6307	0	1	1	738.037	2212.1	2212.1	-1.03	-0.00076	HCD (High Energy Collision Dissociation)	MS2	34.5383	45	35.4352	38305	WQR_1_20190806.raw	F4	4.63	0	0.009776
		FALSE	High	Sequest HT (A2)	Unambiguous	SKELTTEIDNNIEQISSYK		1	1	P13645	P13645	1	3	0.6552	0	1	1	738.037	2212.1	2212.1	-1.03	-0.00076	HCD (High Energy Collision Dissociation)	MS2	18.5102	14.295	35.4418	38314	WQR_1_20190806.raw	F4	4.35	0	0.00733
	FALSE	High	NQILNLTTDNANILLQIDNAR		2.82242e-06	0	1	1	2	P13645	0	2367.26	High	0	1.764e-06	6.42
		Checked	Confidence	Identifying Node	PSM Ambiguity	Annotated Sequence	Modifications	# Protein Groups	# Proteins	Master Protein Accessions	Protein Accessions	# Missed Cleavages	Charge	DeltaScore	DeltaCn	Rank	Search Engine Rank	m/z [Da]	MH+ [Da]	Theo. MH+ [Da]	DeltaM [ppm]	Deltam/z [Da]	Activation Type	MS Order	Isolation Interference [%]	Ion Inject Time [ms]	RT [min]	First Scan	Spectrum File	File ID	XCorr	Percolator q-Value	Percolator PEP
		FALSE	High	Sequest HT (A2)	Unambiguous	NQILNLTTDNANILLQIDNAR		1	1	P13645	P13645	0	2	0.7508	0	1	1	1184.15	2367.28	2367.26	9.32	0.01103	HCD (High Energy Collision Dissociation)	MS2	0	45	48.9354	54126	WQR_1_20190806.raw	F4	6.42	0	1.764e-06
		FALSE	High	Sequest HT (A2)	Unambiguous	NQILNLTTDNANILLQIDNAR		1	1	P13645	P13645	0	3	0.6901	0	1	1	789.762	2367.27	2367.26	4.21	0.00332	HCD (High Energy Collision Dissociation)	MS2	76.4359	18.784	48.9073	54097	WQR_1_20190806.raw	F4	4.84	0	0.0007097
	FALSE	High	NHEEEMKDLR		0.0198523	0	1	1	1	P13645	1	1300.6	High	0	0.0179	3.83
		Checked	Confidence	Identifying Node	PSM Ambiguity	Annotated Sequence	Modifications	# Protein Groups	# Proteins	Master Protein Accessions	Protein Accessions	# Missed Cleavages	Charge	DeltaScore	DeltaCn	Rank	Search Engine Rank	m/z [Da]	MH+ [Da]	Theo. MH+ [Da]	DeltaM [ppm]	Deltam/z [Da]	Activation Type	MS Order	Isolation Interference [%]	Ion Inject Time [ms]	RT [min]	First Scan	Spectrum File	File ID	XCorr	Percolator q-Value	Percolator PEP
		FALSE	High	Sequest HT (A2)	Unambiguous	NHEEEMKDLR		1	1	P13645	P13645	1	3	0.6554	0	1	1	434.204	1300.6	1300.6	0.83	0.00036	HCD (High Energy Collision Dissociation)	MS2	11.269	10.682	9.1283	6724	WQR_1_20190806.raw	F4	3.83	0	0.0179
	FALSE	High	TIDDLKNQILNLTTDNANILLQIDNAR		4.75156e-05	0	1	1	4	P13645	1	3052.63	High	0	0.0002748	6.91
		Checked	Confidence	Identifying Node	PSM Ambiguity	Annotated Sequence	Modifications	# Protein Groups	# Proteins	Master Protein Accessions	Protein Accessions	# Missed Cleavages	Charge	DeltaScore	DeltaCn	Rank	Search Engine Rank	m/z [Da]	MH+ [Da]	Theo. MH+ [Da]	DeltaM [ppm]	Deltam/z [Da]	Activation Type	MS Order	Isolation Interference [%]	Ion Inject Time [ms]	RT [min]	First Scan	Spectrum File	File ID	XCorr	Percolator q-Value	Percolator PEP
		FALSE	High	Sequest HT (A2)	Unambiguous	TIDDLKNQILNLTTDNANILLQIDNAR		1	1	P13645	P13645	1	3	0.7713	0	1	1	1018.22	3052.63	3052.63	1.17	0.00119	HCD (High Energy Collision Dissociation)	MS2	9.72238	45	55.3744	61120	WQR_1_20190806.raw	F4	6.91	0	0.0002748
		FALSE	High	Sequest HT (A2)	Unambiguous	TIDDLKNQILNLTTDNANILLQIDNAR		1	1	P13645	P13645	1	3	0.8077	0	1	1	1018.22	3052.64	3052.63	2.79	0.00284	HCD (High Energy Collision Dissociation)	MS2	38.175	39.213	55.3642	61111	WQR_1_20190806.raw	F4	6.24	0	0.0007304
		FALSE	High	Sequest HT (A2)	Unambiguous	TIDDLKNQILNLTTDNANILLQIDNAR		1	1	P13645	P13645	1	3	0.8209	0	1	1	1018.22	3052.64	3052.63	2.79	0.00284	HCD (High Energy Collision Dissociation)	MS2	27.0027	22.864	55.3601	61106	WQR_1_20190806.raw	F4	5.64	0	3.333e-05
		FALSE	High	Sequest HT (A2)	Unambiguous	TIDDLKNQILNLTTDNANILLQIDNAR		1	1	P13645	P13645	1	3	0.7726	0	1	1	1018.22	3052.64	3052.63	2.79	0.00284	HCD (High Energy Collision Dissociation)	MS2	19.5072	23.677	55.3536	61099	WQR_1_20190806.raw	F4	5.76	0	0.001052
	FALSE	High	NVSTGDVNVEMNAAPGVDLTQLLNNMR	2xOxidation [M11; M26]	0.000779828	0	1	1	5	P13645	0	2904.38	High	0	0.003623	5.39
		Checked	Confidence	Identifying Node	PSM Ambiguity	Annotated Sequence	Modifications	# Protein Groups	# Proteins	Master Protein Accessions	Protein Accessions	# Missed Cleavages	Charge	DeltaScore	DeltaCn	Rank	Search Engine Rank	m/z [Da]	MH+ [Da]	Theo. MH+ [Da]	DeltaM [ppm]	Deltam/z [Da]	Activation Type	MS Order	Isolation Interference [%]	Ion Inject Time [ms]	RT [min]	First Scan	Spectrum File	File ID	XCorr	Percolator q-Value	Percolator PEP
		FALSE	High	Sequest HT (A2)	Unambiguous	NVSTGDVNVEmNAAPGVDLTQLLNNmR	M11(Oxidation); M26(Oxidation)	1	1	P13645	P13645	0	3	0.6209	0	1	1	968.804	2904.4	2904.38	4.75	0.0046	HCD (High Energy Collision Dissociation)	MS2	13.5185	45	42.5149	46679	WQR_1_20190806.raw	F4	4.59	0	0.01356
		FALSE	High	Sequest HT (A2)	Unambiguous	NVSTGDVNVEmNAAPGVDLTQLLNNmR	M11(Oxidation); M26(Oxidation)	1	1	P13645	P13645	0	3	0.7699	0	1	1	968.804	2904.4	2904.38	5.32	0.00515	HCD (High Energy Collision Dissociation)	MS2	11.1174	45	42.4999	46663	WQR_1_20190806.raw	F4	5.39	0	0.003623
		FALSE	High	Sequest HT (A2)	Unambiguous	NVSTGDVNVEmNAAPGVDLTQLLNNmR	M11(Oxidation); M26(Oxidation)	1	1	P13645	P13645	0	3	0.773	0	1	1	968.804	2904.4	2904.38	5.32	0.00515	HCD (High Energy Collision Dissociation)	MS2	4.5666	32.361	42.4873	46648	WQR_1_20190806.raw	F4	5.11	0	0.0006135
		FALSE	High	Sequest HT (A2)	Unambiguous	NVSTGDVNVEmNAAPGVDLTQLLNNmR	M11(Oxidation); M26(Oxidation)	1	1	P13645	P13645	0	3	0.7713	0	1	1	968.803	2904.39	2904.38	3.68	0.00356	HCD (High Energy Collision Dissociation)	MS2	4.42566	28.376	42.4813	46641	WQR_1_20190806.raw	F4	5.29	0	0.004424
		FALSE	High	Sequest HT (A2)	Unambiguous	NVSTGDVNVEmNAAPGVDLTQLLNNmR	M11(Oxidation); M26(Oxidation)	1	1	P13645	P13645	0	3	0.6454	0	1	1	968.804	2904.4	2904.38	5.32	0.00515	HCD (High Energy Collision Dissociation)	MS2	0	45	42.4883	46649	WQR_1_20190806.raw	F4	5.02	0.002119	0.1191
	FALSE	High	NVSTGDVNVEMNAAPGVDLTQLLNNMR	1xOxidation [M11]	0.000497556	0	1	1	2	P13645	0	2888.39	High	0	0.0003982	5.7
		Checked	Confidence	Identifying Node	PSM Ambiguity	Annotated Sequence	Modifications	# Protein Groups	# Proteins	Master Protein Accessions	Protein Accessions	# Missed Cleavages	Charge	DeltaScore	DeltaCn	Rank	Search Engine Rank	m/z [Da]	MH+ [Da]	Theo. MH+ [Da]	DeltaM [ppm]	Deltam/z [Da]	Activation Type	MS Order	Isolation Interference [%]	Ion Inject Time [ms]	RT [min]	First Scan	Spectrum File	File ID	XCorr	Percolator q-Value	Percolator PEP
		FALSE	High	Sequest HT (A2)	Unambiguous	NVSTGDVNVEmNAAPGVDLTQLLNNMR	M11(Oxidation)	1	1	P13645	P13645	0	3	0.6386	0	1	1	963.468	2888.39	2888.39	0.82	0.00079	HCD (High Energy Collision Dissociation)	MS2	0	29.744	50.6498	56018	WQR_1_20190806.raw	F4	5.7	0	0.0003982
		FALSE	High	Sequest HT (A2)	Unambiguous	NVSTGDVNVEmNAAPGVDLTQLLNNMR	M11(Oxidation)	1	1	P13645	P13645	0	3	0.6786	0	1	1	963.468	2888.39	2888.39	0.38	0.00036	HCD (High Energy Collision Dissociation)	MS2	38.3045	45	50.6337	56003	WQR_1_20190806.raw	F4	5.04	0	0.0003843
	FALSE	High	NVQALEIELQSQLALK		0.000280727	0	1	1	4	P13645	0	1797.01	High	0	0.0002122	4.69
		Checked	Confidence	Identifying Node	PSM Ambiguity	Annotated Sequence	Modifications	# Protein Groups	# Proteins	Master Protein Accessions	Protein Accessions	# Missed Cleavages	Charge	DeltaScore	DeltaCn	Rank	Search Engine Rank	m/z [Da]	MH+ [Da]	Theo. MH+ [Da]	DeltaM [ppm]	Deltam/z [Da]	Activation Type	MS Order	Isolation Interference [%]	Ion Inject Time [ms]	RT [min]	First Scan	Spectrum File	File ID	XCorr	Percolator q-Value	Percolator PEP
		FALSE	High	Sequest HT (A2)	Unambiguous	NVQALEIELQSQLALK		1	1	P13645	P13645	0	2	0.7063	0	1	1	899.011	1797.01	1797.01	1.7	0.00153	HCD (High Energy Collision Dissociation)	MS2	63.7016	6.612	46.8731	51796	WQR_1_20190806.raw	F4	3.95	0	0.0003677
		FALSE	High	Sequest HT (A2)	Unambiguous	NVQALEIELQSQLALK		1	1	P13645	P13645	0	2	0.7846	0	1	1	899.011	1797.01	1797.01	1.7	0.00153	HCD (High Energy Collision Dissociation)	MS2	38.2396	14.525	46.8714	51793	WQR_1_20190806.raw	F4	4.69	0	0.0002122
		FALSE	High	Sequest HT (A2)	Unambiguous	NVQALEIELQSQLALK		1	1	P13645	P13645	0	2	0.7494	0	1	1	899.01	1797.01	1797.01	1.02	0.00092	HCD (High Energy Collision Dissociation)	MS2	32.8255	9.388	46.8978	51827	WQR_1_20190806.raw	F4	4.27	0	0.001654
		FALSE	High	Sequest HT (A2)	Unambiguous	NVQALEIELQSQLALK		1	1	P13645	P13645	0	2	0.7666	0	1	1	899.011	1797.01	1797.01	1.77	0.00159	HCD (High Energy Collision Dissociation)	MS2	59.5986	16.253	46.9235	51860	WQR_1_20190806.raw	F4	4.67	0	0.003368
	FALSE	High	ELTTEIDNNIEQISSYK		5.72595e-05	0	1	1	4	P13645	0	1996.97	High	0	4.047e-05	4.81
		Checked	Confidence	Identifying Node	PSM Ambiguity	Annotated Sequence	Modifications	# Protein Groups	# Proteins	Master Protein Accessions	Protein Accessions	# Missed Cleavages	Charge	DeltaScore	DeltaCn	Rank	Search Engine Rank	m/z [Da]	MH+ [Da]	Theo. MH+ [Da]	DeltaM [ppm]	Deltam/z [Da]	Activation Type	MS Order	Isolation Interference [%]	Ion Inject Time [ms]	RT [min]	First Scan	Spectrum File	File ID	XCorr	Percolator q-Value	Percolator PEP
		FALSE	High	Sequest HT (A2)	Unambiguous	ELTTEIDNNIEQISSYK		1	1	P13645	P13645	0	2	0.6292	0	1	1	998.991	1996.98	1996.97	2.22	0.00222	HCD (High Energy Collision Dissociation)	MS2	12.3511	45	39.3304	42907	WQR_1_20190806.raw	F4	4.18	0	0.0007406
		FALSE	High	Sequest HT (A2)	Unambiguous	ELTTEIDNNIEQISSYK		1	1	P13645	P13645	0	2	0.7197	0	1	1	998.991	1996.98	1996.97	2.22	0.00222	HCD (High Energy Collision Dissociation)	MS2	6.46964	7.158	39.3284	42905	WQR_1_20190806.raw	F4	4.71	0	0.001619
		FALSE	High	Sequest HT (A2)	Unambiguous	ELTTEIDNNIEQISSYK		1	1	P13645	P13645	0	2	0.7526	0	1	1	998.992	1996.98	1996.97	3.2	0.00319	HCD (High Energy Collision Dissociation)	MS2	0	21.31	39.2197	42776	WQR_1_20190806.raw	F4	4.81	0	4.047e-05
		FALSE	High	Sequest HT (A2)	Unambiguous	ELTTEIDNNIEQISSYK		1	1	P13645	P13645	0	2	0.7137	0	1	1	998.99	1996.97	1996.97	0.94	0.00093	HCD (High Energy Collision Dissociation)	MS2	16.1885	45	39.1977	42750	WQR_1_20190806.raw	F4	4.61	0	7.804e-05
	FALSE	High	VTMQNLNDRLASYLDKVR		0.0157405	0	3	3	1	P02533; P13645; P08779	2	2136.12	High	0	0.01404	3.85
		Checked	Confidence	Identifying Node	PSM Ambiguity	Annotated Sequence	Modifications	# Protein Groups	# Proteins	Master Protein Accessions	Protein Accessions	# Missed Cleavages	Charge	DeltaScore	DeltaCn	Rank	Search Engine Rank	m/z [Da]	MH+ [Da]	Theo. MH+ [Da]	DeltaM [ppm]	Deltam/z [Da]	Activation Type	MS Order	Isolation Interference [%]	Ion Inject Time [ms]	RT [min]	First Scan	Spectrum File	File ID	XCorr	Percolator q-Value	Percolator PEP
		FALSE	High	Sequest HT (A2)	Unambiguous	VTMQNLNDRLASYLDKVR		3	3	P02533; P13645; P08779	P02533; P13645; P08779	2	4	0.6104	0	1	1	534.787	2136.13	2136.12	1.35	0.00072	HCD (High Energy Collision Dissociation)	MS2	15.9389	45	39.0178	42536	WQR_1_20190806.raw	F4	3.85	0	0.01404
	FALSE	High	ALEESNYELEGK		0.017272	0	1	1	1	P13645	0	1381.65	High	0	0.01545	3.18
		Checked	Confidence	Identifying Node	PSM Ambiguity	Annotated Sequence	Modifications	# Protein Groups	# Proteins	Master Protein Accessions	Protein Accessions	# Missed Cleavages	Charge	DeltaScore	DeltaCn	Rank	Search Engine Rank	m/z [Da]	MH+ [Da]	Theo. MH+ [Da]	DeltaM [ppm]	Deltam/z [Da]	Activation Type	MS Order	Isolation Interference [%]	Ion Inject Time [ms]	RT [min]	First Scan	Spectrum File	File ID	XCorr	Percolator q-Value	Percolator PEP
		FALSE	High	Sequest HT (A2)	Unambiguous	ALEESNYELEGK		1	1	P13645	P13645	0	2	0.7421	0	1	1	691.329	1381.65	1381.65	2.53	0.00175	HCD (High Energy Collision Dissociation)	MS2	5.40776	13.56	18.6456	17755	WQR_1_20190806.raw	F4	3.18	0	0.01545
	FALSE	High	AETECQNTEYQQLLDIK	1xCarbamidomethyl [C5]	0.000461	0	1	1	4	P13645	0	2082.96	High	0	0.000355	5.41
		Checked	Confidence	Identifying Node	PSM Ambiguity	Annotated Sequence	Modifications	# Protein Groups	# Proteins	Master Protein Accessions	Protein Accessions	# Missed Cleavages	Charge	DeltaScore	DeltaCn	Rank	Search Engine Rank	m/z [Da]	MH+ [Da]	Theo. MH+ [Da]	DeltaM [ppm]	Deltam/z [Da]	Activation Type	MS Order	Isolation Interference [%]	Ion Inject Time [ms]	RT [min]	First Scan	Spectrum File	File ID	XCorr	Percolator q-Value	Percolator PEP
		FALSE	High	Sequest HT (A2)	Unambiguous	AETEcQNTEYQQLLDIK	C5(Carbamidomethyl)	1	1	P13645	P13645	0	2	0.6804	0	1	1	1041.99	2082.97	2082.96	2.84	0.00296	HCD (High Energy Collision Dissociation)	MS2	7.38843	39.897	34.3135	36915	WQR_1_20190806.raw	F4	4.38	0	0.000418
		FALSE	High	Sequest HT (A2)	Unambiguous	AETEcQNTEYQQLLDIK	C5(Carbamidomethyl)	1	1	P13645	P13645	0	2	0.7849	0	1	1	1041.98	2082.96	2082.96	-1.37	-0.00143	HCD (High Energy Collision Dissociation)	MS2	0	45	34.2045	36774	WQR_1_20190806.raw	F4	5.3	0	0.0006855
		FALSE	High	Sequest HT (A2)	Unambiguous	AETEcQNTEYQQLLDIK	C5(Carbamidomethyl)	1	1	P13645	P13645	0	2	0.8004	0	1	1	1041.99	2082.97	2082.96	2.14	0.00223	HCD (High Energy Collision Dissociation)	MS2	0	17.996	34.2279	36803	WQR_1_20190806.raw	F4	5.41	0	0.000355
		FALSE	High	Sequest HT (A2)	Unambiguous	AETEcQNTEYQQLLDIK	C5(Carbamidomethyl)	1	1	P13645	P13645	0	2	0.724	0	1	1	1041.99	2082.97	2082.96	2.14	0.00223	HCD (High Energy Collision Dissociation)	MS2	0	19.38	34.2297	36806	WQR_1_20190806.raw	F4	4.42	0	0.0107
	FALSE	High	ADLEMQIESLTEELAYLKK	1xOxidation [M5]	0.000119226	0	1	1	3	P13645	1	2240.14	High	0	0.0009429	6.61
		Checked	Confidence	Identifying Node	PSM Ambiguity	Annotated Sequence	Modifications	# Protein Groups	# Proteins	Master Protein Accessions	Protein Accessions	# Missed Cleavages	Charge	DeltaScore	DeltaCn	Rank	Search Engine Rank	m/z [Da]	MH+ [Da]	Theo. MH+ [Da]	DeltaM [ppm]	Deltam/z [Da]	Activation Type	MS Order	Isolation Interference [%]	Ion Inject Time [ms]	RT [min]	First Scan	Spectrum File	File ID	XCorr	Percolator q-Value	Percolator PEP
		FALSE	High	Sequest HT (A2)	Unambiguous	ADLEmQIESLTEELAYLKK	M5(Oxidation)	1	1	P13645	P13645	1	3	0.6838	0	1	1	747.384	2240.14	2240.14	0.98	0.00073	HCD (High Energy Collision Dissociation)	MS2	4.99059	40.788	54.032	59712	WQR_1_20190806.raw	F4	6.61	0	0.0009429
		FALSE	High	Sequest HT (A2)	Unambiguous	ADLEmQIESLTEELAYLKK	M5(Oxidation)	1	1	P13645	P13645	1	3	0.6882	0	1	1	747.385	2240.14	2240.14	1.47	0.0011	HCD (High Energy Collision Dissociation)	MS2	0	36.228	54.0207	59701	WQR_1_20190806.raw	F4	5.74	0	0.0001149
		FALSE	High	Sequest HT (A2)	Unambiguous	ADLEmQIESLTEELAYLKK	M5(Oxidation)	1	1	P13645	P13645	1	3	0.7529	0	1	1	747.385	2240.14	2240.14	2.12	0.00158	HCD (High Energy Collision Dissociation)	MS2	1.85453	8.83	53.8168	59483	WQR_1_20190806.raw	F4	5.95	0	8.676e-05
	FALSE	High	ADLEMQIESLTEELAYLKK		6.23262e-05	0	1	1	4	P13645	1	2224.14	High	0	4.431e-05	6.2
		Checked	Confidence	Identifying Node	PSM Ambiguity	Annotated Sequence	Modifications	# Protein Groups	# Proteins	Master Protein Accessions	Protein Accessions	# Missed Cleavages	Charge	DeltaScore	DeltaCn	Rank	Search Engine Rank	m/z [Da]	MH+ [Da]	Theo. MH+ [Da]	DeltaM [ppm]	Deltam/z [Da]	Activation Type	MS Order	Isolation Interference [%]	Ion Inject Time [ms]	RT [min]	First Scan	Spectrum File	File ID	XCorr	Percolator q-Value	Percolator PEP
		FALSE	High	Sequest HT (A2)	Unambiguous	ADLEMQIESLTEELAYLKK		1	1	P13645	P13645	1	3	0.7226	0	1	1	742.053	2224.14	2224.14	0.78	0.00058	HCD (High Energy Collision Dissociation)	MS2	0	18.542	53.5612	59212	WQR_1_20190806.raw	F4	6.2	0	4.431e-05
		FALSE	High	Sequest HT (A2)	Unambiguous	ADLEMQIESLTEELAYLKK		1	1	P13645	P13645	1	3	0.6687	0	1	1	742.053	2224.14	2224.14	1.03	0.00076	HCD (High Energy Collision Dissociation)	MS2	0	18.708	53.6506	59307	WQR_1_20190806.raw	F4	4.98	0	0.003545
		FALSE	High	Sequest HT (A2)	Unambiguous	ADLEMQIESLTEELAYLKK		1	1	P13645	P13645	1	3	0.7273	0	1	1	742.053	2224.14	2224.14	1.03	0.00076	HCD (High Energy Collision Dissociation)	MS2	0	16.352	53.6474	59303	WQR_1_20190806.raw	F4	5.72	0	0.0002766
		FALSE	High	Sequest HT (A2)	Unambiguous	ADLEMQIESLTEELAYLKK		1	1	P13645	P13645	1	3	0.6969	0	1	1	742.053	2224.14	2224.14	1.03	0.00076	HCD (High Energy Collision Dissociation)	MS2	5.26203	13.546	53.6468	59302	WQR_1_20190806.raw	F4	5.08	0	0.0002599
	FALSE	High	ADLEMQIESLTEELAYLK	1xOxidation [M5]	5.53501e-05	0	1	1	1	P13645	0	2112.04	High	0	3.907e-05	5.84
		Checked	Confidence	Identifying Node	PSM Ambiguity	Annotated Sequence	Modifications	# Protein Groups	# Proteins	Master Protein Accessions	Protein Accessions	# Missed Cleavages	Charge	DeltaScore	DeltaCn	Rank	Search Engine Rank	m/z [Da]	MH+ [Da]	Theo. MH+ [Da]	DeltaM [ppm]	Deltam/z [Da]	Activation Type	MS Order	Isolation Interference [%]	Ion Inject Time [ms]	RT [min]	First Scan	Spectrum File	File ID	XCorr	Percolator q-Value	Percolator PEP
		FALSE	High	Sequest HT (A2)	Unambiguous	ADLEmQIESLTEELAYLK	M5(Oxidation)	1	1	P13645	P13645	0	2	0.7586	0	1	1	1056.53	2112.05	2112.04	1.9	0.00201	HCD (High Energy Collision Dissociation)	MS2	7.6147	45	57.5877	63202	WQR_1_20190806.raw	F4	5.84	0	3.907e-05
	FALSE	High	ADLEMQIESLTEELAYLK		0.00147267	0	1	1	1	P13645	0	2096.05	High	0	0.001193	5.18
		Checked	Confidence	Identifying Node	PSM Ambiguity	Annotated Sequence	Modifications	# Protein Groups	# Proteins	Master Protein Accessions	Protein Accessions	# Missed Cleavages	Charge	DeltaScore	DeltaCn	Rank	Search Engine Rank	m/z [Da]	MH+ [Da]	Theo. MH+ [Da]	DeltaM [ppm]	Deltam/z [Da]	Activation Type	MS Order	Isolation Interference [%]	Ion Inject Time [ms]	RT [min]	First Scan	Spectrum File	File ID	XCorr	Percolator q-Value	Percolator PEP
		FALSE	High	Sequest HT (A2)	Unambiguous	ADLEMQIESLTEELAYLK		1	1	P13645	P13645	0	2	0.7741	0	1	1	1048.53	2096.05	2096.05	3.22	0.00338	HCD (High Energy Collision Dissociation)	MS2	20.9773	45	57.4712	63098	WQR_1_20190806.raw	F4	5.18	0	0.001193
	FALSE	High	SQYEQLAEQNR		0.01045	0	1	1	2	P13645	0	1365.64	High	0	0.01117	3.06
		Checked	Confidence	Identifying Node	PSM Ambiguity	Annotated Sequence	Modifications	# Protein Groups	# Proteins	Master Protein Accessions	Protein Accessions	# Missed Cleavages	Charge	DeltaScore	DeltaCn	Rank	Search Engine Rank	m/z [Da]	MH+ [Da]	Theo. MH+ [Da]	DeltaM [ppm]	Deltam/z [Da]	Activation Type	MS Order	Isolation Interference [%]	Ion Inject Time [ms]	RT [min]	First Scan	Spectrum File	File ID	XCorr	Percolator q-Value	Percolator PEP
		FALSE	High	Sequest HT (A2)	Unambiguous	SQYEQLAEQNR		1	1	P13645	P13645	0	2	0.7222	0	1	1	683.324	1365.64	1365.64	0.98	0.00067	HCD (High Energy Collision Dissociation)	MS2	0	45	14.6446	13167	WQR_1_20190806.raw	F4	3.06	0	0.01117
		FALSE	High	Sequest HT (A2)	Unambiguous	SQYEQLAEQNR		1	1	P13645	P13645	0	2	0.7059	0	1	1	683.324	1365.64	1365.64	0.89	0.00061	HCD (High Energy Collision Dissociation)	MS2	0	45	14.4839	12973	WQR_1_20190806.raw	F4	3.06	0	0.009158
	FALSE	High	GSLGGGFSSGGFSGGSFSR		4.38384e-05	0	1	1	4	P13645	0	1707.77	High	0	3.31e-05	5.74
		Checked	Confidence	Identifying Node	PSM Ambiguity	Annotated Sequence	Modifications	# Protein Groups	# Proteins	Master Protein Accessions	Protein Accessions	# Missed Cleavages	Charge	DeltaScore	DeltaCn	Rank	Search Engine Rank	m/z [Da]	MH+ [Da]	Theo. MH+ [Da]	DeltaM [ppm]	Deltam/z [Da]	Activation Type	MS Order	Isolation Interference [%]	Ion Inject Time [ms]	RT [min]	First Scan	Spectrum File	File ID	XCorr	Percolator q-Value	Percolator PEP
		FALSE	High	Sequest HT (A2)	Unambiguous	GSLGGGFSSGGFSGGSFSR		1	1	P13645	P13645	0	2	0.7805	0	1	1	854.39	1707.77	1707.77	-0.07	-6e-05	HCD (High Energy Collision Dissociation)	MS2	0	45	30.4056	32040	WQR_1_20190806.raw	F4	5.74	0	3.31e-05
		FALSE	High	Sequest HT (A2)	Unambiguous	GSLGGGFSSGGFSGGSFSR		1	1	P13645	P13645	0	2	0.768	0	1	1	854.39	1707.77	1707.77	0.43	0.00037	HCD (High Energy Collision Dissociation)	MS2	0	15.442	30.4194	32056	WQR_1_20190806.raw	F4	5.56	0	3.06e-05
		FALSE	High	Sequest HT (A2)	Unambiguous	GSLGGGFSSGGFSGGSFSR		1	1	P13645	P13645	0	2	0.712	0	1	1	854.39	1707.77	1707.77	0.43	0.00037	HCD (High Energy Collision Dissociation)	MS2	0	39.345	30.4227	32061	WQR_1_20190806.raw	F4	5.66	0	0.0004612
		FALSE	High	Sequest HT (A2)	Unambiguous	GSLGGGFSSGGFSGGSFSR		1	1	P13645	P13645	0	2	0.6464	0	1	1	854.391	1707.77	1707.77	1.15	0.00098	HCD (High Energy Collision Dissociation)	MS2	4.92444	5.083	30.4568	32104	WQR_1_20190806.raw	F4	4.27	0	0.0004821
	FALSE	High	GSSGGGCFGGSSGGYGGLGGFGGGSFR	1xCarbamidomethyl [C7]	3.84615e-06	0	1	1	3	P13645	0	2342.98	High	0	5.431e-06	6.51
		Checked	Confidence	Identifying Node	PSM Ambiguity	Annotated Sequence	Modifications	# Protein Groups	# Proteins	Master Protein Accessions	Protein Accessions	# Missed Cleavages	Charge	DeltaScore	DeltaCn	Rank	Search Engine Rank	m/z [Da]	MH+ [Da]	Theo. MH+ [Da]	DeltaM [ppm]	Deltam/z [Da]	Activation Type	MS Order	Isolation Interference [%]	Ion Inject Time [ms]	RT [min]	First Scan	Spectrum File	File ID	XCorr	Percolator q-Value	Percolator PEP
		FALSE	High	Sequest HT (A2)	Unambiguous	GSSGGGcFGGSSGGYGGLGGFGGGSFR	C7(Carbamidomethyl)	1	1	P13645	P13645	0	2	0.8541	0	1	1	1172	2342.99	2342.98	2.85	0.00334	HCD (High Energy Collision Dissociation)	MS2	0	15.268	34.623	37299	WQR_1_20190806.raw	F4	6.51	0	5.431e-06
		FALSE	High	Sequest HT (A2)	Unambiguous	GSSGGGcFGGSSGGYGGLGGFGGGSFR	C7(Carbamidomethyl)	1	1	P13645	P13645	0	2	0.8261	0	1	1	1172	2342.98	2342.98	-0.38	-0.00044	HCD (High Energy Collision Dissociation)	MS2	0	7.018	34.6811	37371	WQR_1_20190806.raw	F4	6.21	0	2.429e-06
		FALSE	High	Sequest HT (A2)	Unambiguous	GSSGGGcFGGSSGGYGGLGGFGGGSFR	C7(Carbamidomethyl)	1	1	P13645	P13645	0	3	0.6842	0	1	1	781.667	2342.99	2342.98	0.58	0.00045	HCD (High Energy Collision Dissociation)	MS2	48.0508	9.047	34.685	37377	WQR_1_20190806.raw	F4	3.42	0.0007925	0.06038
	FALSE	High	SQYEQLAEQNRK		0.0459947	0.00152962	1	1	1	P13645	1	1493.73	High	0.0007925	0.04282	3.45
		Checked	Confidence	Identifying Node	PSM Ambiguity	Annotated Sequence	Modifications	# Protein Groups	# Proteins	Master Protein Accessions	Protein Accessions	# Missed Cleavages	Charge	DeltaScore	DeltaCn	Rank	Search Engine Rank	m/z [Da]	MH+ [Da]	Theo. MH+ [Da]	DeltaM [ppm]	Deltam/z [Da]	Activation Type	MS Order	Isolation Interference [%]	Ion Inject Time [ms]	RT [min]	First Scan	Spectrum File	File ID	XCorr	Percolator q-Value	Percolator PEP
		FALSE	High	Sequest HT (A2)	Unambiguous	SQYEQLAEQNRK		1	1	P13645	P13645	1	3	0.6203	0	1	1	498.584	1493.74	1493.73	2.69	0.00134	HCD (High Energy Collision Dissociation)	MS2	41.2575	7.98	11.872	9908	WQR_1_20190806.raw	F4	3.45	0.0007925	0.04282
	FALSE	High	SLLEGEGSSGGGGR		0.0424872	0.00152962	1	1	1	P13645	0	1262.6	High	0.0007925	0.03946	3.23
		Checked	Confidence	Identifying Node	PSM Ambiguity	Annotated Sequence	Modifications	# Protein Groups	# Proteins	Master Protein Accessions	Protein Accessions	# Missed Cleavages	Charge	DeltaScore	DeltaCn	Rank	Search Engine Rank	m/z [Da]	MH+ [Da]	Theo. MH+ [Da]	DeltaM [ppm]	Deltam/z [Da]	Activation Type	MS Order	Isolation Interference [%]	Ion Inject Time [ms]	RT [min]	First Scan	Spectrum File	File ID	XCorr	Percolator q-Value	Percolator PEP
		FALSE	High	Sequest HT (A2)	Unambiguous	SLLEGEGSSGGGGR		1	1	P13645	P13645	0	2	0.548	0	1	1	631.803	1262.6	1262.6	1.42	0.0009	HCD (High Energy Collision Dissociation)	MS2	10.0707	22.001	13.6068	11948	WQR_1_20190806.raw	F4	3.23	0.0007925	0.03946
	FALSE	High	DAEAWFNEK		0.0679287	0.00152962	1	4	1	P13645	0	1109.49	High	0.0007925	0.06416	2.63
		Checked	Confidence	Identifying Node	PSM Ambiguity	Annotated Sequence	Modifications	# Protein Groups	# Proteins	Master Protein Accessions	Protein Accessions	# Missed Cleavages	Charge	DeltaScore	DeltaCn	Rank	Search Engine Rank	m/z [Da]	MH+ [Da]	Theo. MH+ [Da]	DeltaM [ppm]	Deltam/z [Da]	Activation Type	MS Order	Isolation Interference [%]	Ion Inject Time [ms]	RT [min]	First Scan	Spectrum File	File ID	XCorr	Percolator q-Value	Percolator PEP
		FALSE	High	Sequest HT (A2)	Unambiguous	DAEAWFNEK		1	4	P13645	Q7Z3Y7; P13645; Q7Z3Z0; Q7Z3Y8	0	2	0.5513	0	1	1	555.25	1109.49	1109.49	2.18	0.00121	HCD (High Energy Collision Dissociation)	MS2	89.8037	7.615	27.3398	28306	WQR_1_20190806.raw	F4	2.63	0.0007925	0.06416
	FALSE	High	VTMQNLNDR		0.0710775	0.00152962	3	7	1	P02533; P13645; P08779	0	1090.53	High	0.0007925	0.06723	2.56
		Checked	Confidence	Identifying Node	PSM Ambiguity	Annotated Sequence	Modifications	# Protein Groups	# Proteins	Master Protein Accessions	Protein Accessions	# Missed Cleavages	Charge	DeltaScore	DeltaCn	Rank	Search Engine Rank	m/z [Da]	MH+ [Da]	Theo. MH+ [Da]	DeltaM [ppm]	Deltam/z [Da]	Activation Type	MS Order	Isolation Interference [%]	Ion Inject Time [ms]	RT [min]	First Scan	Spectrum File	File ID	XCorr	Percolator q-Value	Percolator PEP
		FALSE	High	Sequest HT (A2)	Unambiguous	VTMQNLNDR		3	7	P02533; P13645; P08779	P02533; Q7Z3Y7; P13645; Q7Z3Y9; Q7Z3Z0; Q7Z3Y8; P08779	0	2	0.5273	0	1	1	545.77	1090.53	1090.53	1.53	0.00084	HCD (High Energy Collision Dissociation)	MS2	0	45	13.8718	12259	WQR_1_20190806.raw	F4	2.56	0.0007925	0.06723
	FALSE	High	VTMQNLNDR	1xOxidation [M3]	0.0676492	0.00152962	3	7	1	P02533; P13645; P08779	0	1106.53	High	0.0007925	0.06384	2.91
		Checked	Confidence	Identifying Node	PSM Ambiguity	Annotated Sequence	Modifications	# Protein Groups	# Proteins	Master Protein Accessions	Protein Accessions	# Missed Cleavages	Charge	DeltaScore	DeltaCn	Rank	Search Engine Rank	m/z [Da]	MH+ [Da]	Theo. MH+ [Da]	DeltaM [ppm]	Deltam/z [Da]	Activation Type	MS Order	Isolation Interference [%]	Ion Inject Time [ms]	RT [min]	First Scan	Spectrum File	File ID	XCorr	Percolator q-Value	Percolator PEP
		FALSE	High	Sequest HT (A2)	Unambiguous	VTmQNLNDR	M3(Oxidation)	3	7	P02533; P13645; P08779	P02533; Q7Z3Y7; P13645; Q7Z3Y9; Q7Z3Z0; Q7Z3Y8; P08779	0	2	0.5533	0	1	1	553.767	1106.53	1106.53	0.15	8e-05	HCD (High Energy Collision Dissociation)	MS2	17.8983	45	8.5734	6055	WQR_1_20190806.raw	F4	2.91	0.0007925	0.06384
	FALSE	High	SQYEQLAEQNRKDAEAWFNEK		0.11312	0.00267473	1	1	1	P13645	2	2584.21	High	0.001475	0.1086	3.65
		Checked	Confidence	Identifying Node	PSM Ambiguity	Annotated Sequence	Modifications	# Protein Groups	# Proteins	Master Protein Accessions	Protein Accessions	# Missed Cleavages	Charge	DeltaScore	DeltaCn	Rank	Search Engine Rank	m/z [Da]	MH+ [Da]	Theo. MH+ [Da]	DeltaM [ppm]	Deltam/z [Da]	Activation Type	MS Order	Isolation Interference [%]	Ion Inject Time [ms]	RT [min]	First Scan	Spectrum File	File ID	XCorr	Percolator q-Value	Percolator PEP
		FALSE	High	Sequest HT (A2)	Unambiguous	SQYEQLAEQNRKDAEAWFNEK		1	1	P13645	P13645	2	4	0.4082	0	1	1	646.809	2584.21	2584.21	3	0.00194	HCD (High Energy Collision Dissociation)	MS2	27.3565	17.893	31.8865	33897	WQR_1_20190806.raw	F4	3.65	0.001475	0.1086
	FALSE	High	VLDELTLTK		0.0962074	0.00267473	1	1	1	P13645	0	1031.6	High	0.001475	0.09177	2.39
		Checked	Confidence	Identifying Node	PSM Ambiguity	Annotated Sequence	Modifications	# Protein Groups	# Proteins	Master Protein Accessions	Protein Accessions	# Missed Cleavages	Charge	DeltaScore	DeltaCn	Rank	Search Engine Rank	m/z [Da]	MH+ [Da]	Theo. MH+ [Da]	DeltaM [ppm]	Deltam/z [Da]	Activation Type	MS Order	Isolation Interference [%]	Ion Inject Time [ms]	RT [min]	First Scan	Spectrum File	File ID	XCorr	Percolator q-Value	Percolator PEP
		FALSE	High	Sequest HT (A2)	Unambiguous	VLDELTLTK		1	1	P13645	P13645	0	2	0.3849	0	1	1	516.303	1031.6	1031.6	0.96	0.00049	HCD (High Energy Collision Dissociation)	MS2	27.08	8.462	26.061	26721	WQR_1_20190806.raw	F4	2.39	0.001475	0.09177
	FALSE	High	LASYLDKVR		0.115889	0.00267473	3	7	2	P02533; P13645; P08779	1	1064.61	High	0.001475	0.1114	2.52
		Checked	Confidence	Identifying Node	PSM Ambiguity	Annotated Sequence	Modifications	# Protein Groups	# Proteins	Master Protein Accessions	Protein Accessions	# Missed Cleavages	Charge	DeltaScore	DeltaCn	Rank	Search Engine Rank	m/z [Da]	MH+ [Da]	Theo. MH+ [Da]	DeltaM [ppm]	Deltam/z [Da]	Activation Type	MS Order	Isolation Interference [%]	Ion Inject Time [ms]	RT [min]	First Scan	Spectrum File	File ID	XCorr	Percolator q-Value	Percolator PEP
		FALSE	High	Sequest HT (A2)	Unambiguous	LASYLDKVR		3	7	P02533; P13645; P08779	P02533; P08727; P13645; P19012; Q99456; Q04695; P08779	1	3	0.6627	0	1	1	355.542	1064.61	1064.61	0.25	9e-05	HCD (High Energy Collision Dissociation)	MS2	82.3055	33.199	17.829	16809	WQR_1_20190806.raw	F4	2.52	0.001475	0.1114
		FALSE	High	Sequest HT (A2)	Unambiguous	LASYLDKVR		3	7	P02533; P13645; P08779	P02533; P08727; P13645; P19012; Q99456; Q04695; P08779	1	2	0.6025	0	1	1	532.807	1064.61	1064.61	-2.6	-0.00138	HCD (High Energy Collision Dissociation)	MS2	0	18.639	17.9123	16918	WQR_1_20190806.raw	F4	2.39	0.002119	0.1288
	FALSE	High	ELTTEIDNNIEQISSYKSEITELRR		0.114036	0.00267473	1	1	1	P13645	2	2981.51	High	0.001475	0.1093	2.66
		Checked	Confidence	Identifying Node	PSM Ambiguity	Annotated Sequence	Modifications	# Protein Groups	# Proteins	Master Protein Accessions	Protein Accessions	# Missed Cleavages	Charge	DeltaScore	DeltaCn	Rank	Search Engine Rank	m/z [Da]	MH+ [Da]	Theo. MH+ [Da]	DeltaM [ppm]	Deltam/z [Da]	Activation Type	MS Order	Isolation Interference [%]	Ion Inject Time [ms]	RT [min]	First Scan	Spectrum File	File ID	XCorr	Percolator q-Value	Percolator PEP
		FALSE	High	Sequest HT (A2)	Unambiguous	ELTTEIDNNIEQISSYKSEITELRR		1	1	P13645	P13645	2	4	0.3008	0	1	1	746.133	2981.51	2981.51	1.82	0.00135	HCD (High Energy Collision Dissociation)	MS2	25.6938	40.293	42.4192	46570	WQR_1_20190806.raw	F4	2.66	0.001475	0.1093
	FALSE	High	NHEEEMKDLR	1xOxidation [M6]	0.13072	0.00267473	1	1	1	P13645	1	1316.59	High	0.002119	0.1261	2.26
		Checked	Confidence	Identifying Node	PSM Ambiguity	Annotated Sequence	Modifications	# Protein Groups	# Proteins	Master Protein Accessions	Protein Accessions	# Missed Cleavages	Charge	DeltaScore	DeltaCn	Rank	Search Engine Rank	m/z [Da]	MH+ [Da]	Theo. MH+ [Da]	DeltaM [ppm]	Deltam/z [Da]	Activation Type	MS Order	Isolation Interference [%]	Ion Inject Time [ms]	RT [min]	First Scan	Spectrum File	File ID	XCorr	Percolator q-Value	Percolator PEP
		FALSE	High	Sequest HT (A2)	Unambiguous	NHEEEmKDLR	M6(Oxidation)	1	1	P13645	P13645	1	3	0.6062	0	1	1	439.535	1316.59	1316.59	0.53	0.00023	HCD (High Energy Collision Dissociation)	MS2	10.7135	17.719	7.1519	4364	WQR_1_20190806.raw	F4	2.26	0.002119	0.1261
	FALSE	High	IRLENEIQTYR		0.149688	0.00381703	1	1	1	P13645	1	1434.77	High	0.002731	0.1449	2.98
		Checked	Confidence	Identifying Node	PSM Ambiguity	Annotated Sequence	Modifications	# Protein Groups	# Proteins	Master Protein Accessions	Protein Accessions	# Missed Cleavages	Charge	DeltaScore	DeltaCn	Rank	Search Engine Rank	m/z [Da]	MH+ [Da]	Theo. MH+ [Da]	DeltaM [ppm]	Deltam/z [Da]	Activation Type	MS Order	Isolation Interference [%]	Ion Inject Time [ms]	RT [min]	First Scan	Spectrum File	File ID	XCorr	Percolator q-Value	Percolator PEP
		FALSE	High	Sequest HT (A2)	Unambiguous	IRLENEIQTYR		1	1	P13645	P13645	1	3	0.4664	0	1	1	478.928	1434.77	1434.77	0.37	0.00018	HCD (High Energy Collision Dissociation)	MS2	0	29.002	21.7258	21455	WQR_1_20190806.raw	F4	2.98	0.002731	0.1449
FALSE	High	Master Protein	P35908	Keratin, type II cytoskeletal 2 epidermal OS=Homo sapiens OX=9606 GN=KRT2 PE=1 SV=2	0	90.389	71	37	59	30	1	639	65.4	8	236.66	37
	Checked	Confidence	Sequence	Modifications	Qvality PEP	Qvality q-value	# Protein Groups	# Proteins	# PSMs	Master Protein Accessions	# Missed Cleavages	Theo. MH+ [Da]	Confidence (by Search Engine): Sequest HT	Percolator q-Value (by Search Engine): Sequest HT	Percolator PEP (by Search Engine): Sequest HT	XCorr (by Search Engine): Sequest HT
	FALSE	High	TSQNSELNNMQDLVEDYKK	1xOxidation [M10]	0.00199798	0	1	1	1	P35908	1	2272.04	High	0	0.001638	4.12
		Checked	Confidence	Identifying Node	PSM Ambiguity	Annotated Sequence	Modifications	# Protein Groups	# Proteins	Master Protein Accessions	Protein Accessions	# Missed Cleavages	Charge	DeltaScore	DeltaCn	Rank	Search Engine Rank	m/z [Da]	MH+ [Da]	Theo. MH+ [Da]	DeltaM [ppm]	Deltam/z [Da]	Activation Type	MS Order	Isolation Interference [%]	Ion Inject Time [ms]	RT [min]	First Scan	Spectrum File	File ID	XCorr	Percolator q-Value	Percolator PEP
		FALSE	High	Sequest HT (A2)	Unambiguous	TSQNSELNNmQDLVEDYKK	M10(Oxidation)	1	1	P35908	P35908	1	3	0.7184	0	1	1	758.018	2272.04	2272.04	0.18	0.00014	HCD (High Energy Collision Dissociation)	MS2	0	26.705	20.0115	19372	WQR_1_20190806.raw	F4	4.12	0	0.001638
	FALSE	High	TSQNSELNNMQDLVEDYKK		2.61356e-05	0	1	1	4	P35908	1	2256.04	High	0	1.793e-05	5.87
		Checked	Confidence	Identifying Node	PSM Ambiguity	Annotated Sequence	Modifications	# Protein Groups	# Proteins	Master Protein Accessions	Protein Accessions	# Missed Cleavages	Charge	DeltaScore	DeltaCn	Rank	Search Engine Rank	m/z [Da]	MH+ [Da]	Theo. MH+ [Da]	DeltaM [ppm]	Deltam/z [Da]	Activation Type	MS Order	Isolation Interference [%]	Ion Inject Time [ms]	RT [min]	First Scan	Spectrum File	File ID	XCorr	Percolator q-Value	Percolator PEP
		FALSE	High	Sequest HT (A2)	Unambiguous	TSQNSELNNMQDLVEDYKK		1	1	P35908	P35908	1	3	0.7257	0	1	1	752.684	2256.04	2256.04	-3.34	-0.00251	HCD (High Energy Collision Dissociation)	MS2	48.1784	34.972	32.5183	34706	WQR_1_20190806.raw	F4	5.87	0	1.793e-05
		FALSE	High	Sequest HT (A2)	Unambiguous	TSQNSELNNMQDLVEDYKK		1	1	P35908	P35908	1	3	0.7776	0	1	1	752.687	2256.05	2256.04	0.15	0.00011	HCD (High Energy Collision Dissociation)	MS2	6.27288	6.104	32.5369	34729	WQR_1_20190806.raw	F4	5.71	0	0.0005295
		FALSE	High	Sequest HT (A2)	Unambiguous	TSQNSELNNMQDLVEDYKK		1	1	P35908	P35908	1	3	0.6366	0	1	1	752.688	2256.05	2256.04	1.53	0.00115	HCD (High Energy Collision Dissociation)	MS2	0	7.951	32.5498	34745	WQR_1_20190806.raw	F4	4.76	0	0.0164
		FALSE	High	Sequest HT (A2)	Unambiguous	TSQNSELNNMQDLVEDYKK		1	1	P35908	P35908	1	3	0.5575	0	1	1	752.687	2256.05	2256.04	0.47	0.00036	HCD (High Energy Collision Dissociation)	MS2	7.34209	45	32.581	34784	WQR_1_20190806.raw	F4	5.04	0	0.02103
	FALSE	High	LNDLEEALQQAKEDLAR		2.19657e-05	0	1	1	3	P35908	1	1956	High	0	1.496e-05	6.35
		Checked	Confidence	Identifying Node	PSM Ambiguity	Annotated Sequence	Modifications	# Protein Groups	# Proteins	Master Protein Accessions	Protein Accessions	# Missed Cleavages	Charge	DeltaScore	DeltaCn	Rank	Search Engine Rank	m/z [Da]	MH+ [Da]	Theo. MH+ [Da]	DeltaM [ppm]	Deltam/z [Da]	Activation Type	MS Order	Isolation Interference [%]	Ion Inject Time [ms]	RT [min]	First Scan	Spectrum File	File ID	XCorr	Percolator q-Value	Percolator PEP
		FALSE	High	Sequest HT (A2)	Unambiguous	LNDLEEALQQAKEDLAR		1	1	P35908	P35908	1	3	0.6926	0	1	1	652.673	1956.01	1956	1.03	0.00067	HCD (High Energy Collision Dissociation)	MS2	4.26601	15.565	45.5093	50181	WQR_1_20190806.raw	F4	5.66	0	0.0002388
		FALSE	High	Sequest HT (A2)	Unambiguous	LNDLEEALQQAKEDLAR		1	1	P35908	P35908	1	3	0.6951	0	1	1	652.673	1956	1956	0.57	0.00037	HCD (High Energy Collision Dissociation)	MS2	0	13.894	45.4977	50168	WQR_1_20190806.raw	F4	5.74	0	0.0009039
		FALSE	High	Sequest HT (A2)	Unambiguous	LNDLEEALQQAKEDLAR		1	1	P35908	P35908	1	3	0.6252	0	1	1	652.673	1956	1956	0	0	HCD (High Energy Collision Dissociation)	MS2	0	27.779	45.477	50146	WQR_1_20190806.raw	F4	6.35	0	1.496e-05
	FALSE	High	LNDLEEALQQAK		0.00889975	0	1	1	1	P35908	0	1371.71	High	0	0.007748	3.07
		Checked	Confidence	Identifying Node	PSM Ambiguity	Annotated Sequence	Modifications	# Protein Groups	# Proteins	Master Protein Accessions	Protein Accessions	# Missed Cleavages	Charge	DeltaScore	DeltaCn	Rank	Search Engine Rank	m/z [Da]	MH+ [Da]	Theo. MH+ [Da]	DeltaM [ppm]	Deltam/z [Da]	Activation Type	MS Order	Isolation Interference [%]	Ion Inject Time [ms]	RT [min]	First Scan	Spectrum File	File ID	XCorr	Percolator q-Value	Percolator PEP
		FALSE	High	Sequest HT (A2)	Unambiguous	LNDLEEALQQAK		1	1	P35908	P35908	0	2	0.4756	0	1	1	686.359	1371.71	1371.71	-1.22	-0.00084	HCD (High Energy Collision Dissociation)	MS2	39.4137	17.455	31.2434	33104	WQR_1_20190806.raw	F4	3.07	0	0.007748
	FALSE	High	VDLLNQEIEFLK		0.00136452	0	1	1	2	P35908	0	1460.8	High	0	0.002303	3.76
		Checked	Confidence	Identifying Node	PSM Ambiguity	Annotated Sequence	Modifications	# Protein Groups	# Proteins	Master Protein Accessions	Protein Accessions	# Missed Cleavages	Charge	DeltaScore	DeltaCn	Rank	Search Engine Rank	m/z [Da]	MH+ [Da]	Theo. MH+ [Da]	DeltaM [ppm]	Deltam/z [Da]	Activation Type	MS Order	Isolation Interference [%]	Ion Inject Time [ms]	RT [min]	First Scan	Spectrum File	File ID	XCorr	Percolator q-Value	Percolator PEP
		FALSE	High	Sequest HT (A2)	Unambiguous	VDLLNQEIEFLK		1	1	P35908	P35908	0	2	0.6334	0	1	1	730.905	1460.8	1460.8	1.56	0.00114	HCD (High Energy Collision Dissociation)	MS2	30.547	3.727	46.0645	50817	WQR_1_20190806.raw	F4	3.71	0	0.001102
		FALSE	High	Sequest HT (A2)	Unambiguous	VDLLNQEIEFLK		1	1	P35908	P35908	0	2	0.625	0	1	1	730.907	1460.81	1460.8	4.32	0.00316	HCD (High Energy Collision Dissociation)	MS2	44.8479	17.496	46.0218	50768	WQR_1_20190806.raw	F4	3.76	0	0.002303
	FALSE	High	LALDVEIATYR		0.0216909	0	3	9	2	P35908; P02538; P13647	0	1263.69	High	0	0.0196	3.57
		Checked	Confidence	Identifying Node	PSM Ambiguity	Annotated Sequence	Modifications	# Protein Groups	# Proteins	Master Protein Accessions	Protein Accessions	# Missed Cleavages	Charge	DeltaScore	DeltaCn	Rank	Search Engine Rank	m/z [Da]	MH+ [Da]	Theo. MH+ [Da]	DeltaM [ppm]	Deltam/z [Da]	Activation Type	MS Order	Isolation Interference [%]	Ion Inject Time [ms]	RT [min]	First Scan	Spectrum File	File ID	XCorr	Percolator q-Value	Percolator PEP
		FALSE	High	Sequest HT (A2)	Unambiguous	LALDVEIATYR		3	9	P35908; P02538; P13647	Q5XKE5; P35908; P04259; P02538; Q01546; O95678; P48668; P12035; P13647	0	2	0.3618	0	1	1	632.348	1263.69	1263.69	-4.01	-0.00254	HCD (High Energy Collision Dissociation)	MS2	26.2113	42.433	35.3204	38168	WQR_1_20190806.raw	F4	3.51	0	0.02026
		FALSE	High	Sequest HT (A2)	Unambiguous	LALDVEIATYR		3	9	P35908; P02538; P13647	Q5XKE5; P35908; P04259; P02538; Q01546; O95678; P48668; P12035; P13647	0	2	0.4482	0	1	1	632.351	1263.7	1263.69	0.82	0.00052	HCD (High Energy Collision Dissociation)	MS2	0	10.002	35.333	38181	WQR_1_20190806.raw	F4	3.57	0	0.0196
	FALSE	High	TAAENDFVTLKK		0.0164191	0	1	1	1	P35908	1	1336.71	High	0	0.01466	3.38
		Checked	Confidence	Identifying Node	PSM Ambiguity	Annotated Sequence	Modifications	# Protein Groups	# Proteins	Master Protein Accessions	Protein Accessions	# Missed Cleavages	Charge	DeltaScore	DeltaCn	Rank	Search Engine Rank	m/z [Da]	MH+ [Da]	Theo. MH+ [Da]	DeltaM [ppm]	Deltam/z [Da]	Activation Type	MS Order	Isolation Interference [%]	Ion Inject Time [ms]	RT [min]	First Scan	Spectrum File	File ID	XCorr	Percolator q-Value	Percolator PEP
		FALSE	High	Sequest HT (A2)	Unambiguous	TAAENDFVTLKK		1	1	P35908	P35908	1	2	0.6834	0	1	1	668.859	1336.71	1336.71	0.57	0.00038	HCD (High Energy Collision Dissociation)	MS2	33.3743	45	17.6887	16640	WQR_1_20190806.raw	F4	3.38	0	0.01466
	FALSE	High	SISISVAGGGGGFGAAGGFGGR		9.60439e-05	0	1	1	2	P35908	0	1838.91	High	0	6.948e-05	5.22
		Checked	Confidence	Identifying Node	PSM Ambiguity	Annotated Sequence	Modifications	# Protein Groups	# Proteins	Master Protein Accessions	Protein Accessions	# Missed Cleavages	Charge	DeltaScore	DeltaCn	Rank	Search Engine Rank	m/z [Da]	MH+ [Da]	Theo. MH+ [Da]	DeltaM [ppm]	Deltam/z [Da]	Activation Type	MS Order	Isolation Interference [%]	Ion Inject Time [ms]	RT [min]	First Scan	Spectrum File	File ID	XCorr	Percolator q-Value	Percolator PEP
		FALSE	High	Sequest HT (A2)	Unambiguous	SISISVAGGGGGFGAAGGFGGR		1	1	P35908	P35908	0	2	0.7631	0	1	1	919.962	1838.92	1838.91	1.58	0.00145	HCD (High Energy Collision Dissociation)	MS2	0	29.596	34.9232	37672	WQR_1_20190806.raw	F4	4.98	0	0.000149
		FALSE	High	Sequest HT (A2)	Unambiguous	SISISVAGGGGGFGAAGGFGGR		1	1	P35908	P35908	0	2	0.7816	0	1	1	919.963	1838.92	1838.91	2.84	0.00261	HCD (High Energy Collision Dissociation)	MS2	15.1168	45	34.8656	37596	WQR_1_20190806.raw	F4	5.22	0	6.948e-05
	FALSE	High	SKEEAEALYHSK		0.0161442	0	1	1	1	P35908	1	1391.68	High	0	0.0144	4.13
		Checked	Confidence	Identifying Node	PSM Ambiguity	Annotated Sequence	Modifications	# Protein Groups	# Proteins	Master Protein Accessions	Protein Accessions	# Missed Cleavages	Charge	DeltaScore	DeltaCn	Rank	Search Engine Rank	m/z [Da]	MH+ [Da]	Theo. MH+ [Da]	DeltaM [ppm]	Deltam/z [Da]	Activation Type	MS Order	Isolation Interference [%]	Ion Inject Time [ms]	RT [min]	First Scan	Spectrum File	File ID	XCorr	Percolator q-Value	Percolator PEP
		FALSE	High	Sequest HT (A2)	Unambiguous	SKEEAEALYHSK		1	1	P35908	P35908	1	3	0.7119	0	1	1	464.566	1391.68	1391.68	1.55	0.00072	HCD (High Energy Collision Dissociation)	MS2	51.5462	45	9.5016	7168	WQR_1_20190806.raw	F4	4.13	0	0.0144
	FALSE	High	NKLNDLEEALQQAKEDLAR		0.00015772	0	1	1	2	P35908	2	2198.14	High	0	0.0001163	5.8
		Checked	Confidence	Identifying Node	PSM Ambiguity	Annotated Sequence	Modifications	# Protein Groups	# Proteins	Master Protein Accessions	Protein Accessions	# Missed Cleavages	Charge	DeltaScore	DeltaCn	Rank	Search Engine Rank	m/z [Da]	MH+ [Da]	Theo. MH+ [Da]	DeltaM [ppm]	Deltam/z [Da]	Activation Type	MS Order	Isolation Interference [%]	Ion Inject Time [ms]	RT [min]	First Scan	Spectrum File	File ID	XCorr	Percolator q-Value	Percolator PEP
		FALSE	High	Sequest HT (A2)	Unambiguous	NKLNDLEEALQQAKEDLAR		1	1	P35908	P35908	2	3	0.6786	0	1	1	733.386	2198.14	2198.14	1.28	0.00094	HCD (High Energy Collision Dissociation)	MS2	10.5613	11.026	44.6561	49218	WQR_1_20190806.raw	F4	5.01	0	0.0004429
		FALSE	High	Sequest HT (A2)	Unambiguous	NKLNDLEEALQQAKEDLAR		1	1	P35908	P35908	2	3	0.7172	0	1	1	733.387	2198.15	2198.14	2.11	0.00155	HCD (High Energy Collision Dissociation)	MS2	44.797	7.225	44.6011	49148	WQR_1_20190806.raw	F4	5.8	0	0.0001163
	FALSE	High	NKLNDLEEALQQAK		0.0155424	0	1	1	2	P35908	1	1613.85	High	0	0.02058	4.59
		Checked	Confidence	Identifying Node	PSM Ambiguity	Annotated Sequence	Modifications	# Protein Groups	# Proteins	Master Protein Accessions	Protein Accessions	# Missed Cleavages	Charge	DeltaScore	DeltaCn	Rank	Search Engine Rank	m/z [Da]	MH+ [Da]	Theo. MH+ [Da]	DeltaM [ppm]	Deltam/z [Da]	Activation Type	MS Order	Isolation Interference [%]	Ion Inject Time [ms]	RT [min]	First Scan	Spectrum File	File ID	XCorr	Percolator q-Value	Percolator PEP
		FALSE	High	Sequest HT (A2)	Unambiguous	NKLNDLEEALQQAK		1	1	P35908	P35908	1	3	0.6623	0	1	1	538.622	1613.85	1613.85	0.76	0.00041	HCD (High Energy Collision Dissociation)	MS2	68.4961	3.441	32.7552	35010	WQR_1_20190806.raw	F4	4.59	0	0.02058
		FALSE	High	Sequest HT (A2)	Unambiguous	NKLNDLEEALQQAK		1	1	P35908	P35908	1	3	0.693	0	1	1	538.621	1613.85	1613.85	-0.26	-0.00014	HCD (High Energy Collision Dissociation)	MS2	48.85	2.809	32.7786	35043	WQR_1_20190806.raw	F4	4.43	0	0.01387
	FALSE	High	NVQDAIADAEQR		0.00634577	0	1	1	2	P35908	0	1329.64	High	0	0.006571	3.43
		Checked	Confidence	Identifying Node	PSM Ambiguity	Annotated Sequence	Modifications	# Protein Groups	# Proteins	Master Protein Accessions	Protein Accessions	# Missed Cleavages	Charge	DeltaScore	DeltaCn	Rank	Search Engine Rank	m/z [Da]	MH+ [Da]	Theo. MH+ [Da]	DeltaM [ppm]	Deltam/z [Da]	Activation Type	MS Order	Isolation Interference [%]	Ion Inject Time [ms]	RT [min]	First Scan	Spectrum File	File ID	XCorr	Percolator q-Value	Percolator PEP
		FALSE	High	Sequest HT (A2)	Unambiguous	NVQDAIADAEQR		1	1	P35908	P35908	0	2	0.7318	0	1	1	665.324	1329.64	1329.64	1.74	0.00116	HCD (High Energy Collision Dissociation)	MS2	0	45	21.8737	21629	WQR_1_20190806.raw	F4	3.43	0	0.006571
		FALSE	High	Sequest HT (A2)	Unambiguous	NVQDAIADAEQR		1	1	P35908	P35908	0	2	0.7262	0	1	1	665.324	1329.64	1329.64	1.1	0.00073	HCD (High Energy Collision Dissociation)	MS2	0	44.46	21.8816	21639	WQR_1_20190806.raw	F4	3.25	0	0.005447
	FALSE	High	NVQDAIADAEQRGEHALK		0.0201901	0	1	1	3	P35908	1	1964.98	High	0	0.01823	4.46
		Checked	Confidence	Identifying Node	PSM Ambiguity	Annotated Sequence	Modifications	# Protein Groups	# Proteins	Master Protein Accessions	Protein Accessions	# Missed Cleavages	Charge	DeltaScore	DeltaCn	Rank	Search Engine Rank	m/z [Da]	MH+ [Da]	Theo. MH+ [Da]	DeltaM [ppm]	Deltam/z [Da]	Activation Type	MS Order	Isolation Interference [%]	Ion Inject Time [ms]	RT [min]	First Scan	Spectrum File	File ID	XCorr	Percolator q-Value	Percolator PEP
		FALSE	High	Sequest HT (A2)	Unambiguous	NVQDAIADAEQRGEHALK		1	1	P35908	P35908	1	3	0.7287	0	1	1	655.664	1964.98	1964.98	0.15	0.0001	HCD (High Energy Collision Dissociation)	MS2	0	11.135	31.2088	33058	WQR_1_20190806.raw	F4	4.46	0	0.01823
		FALSE	High	Sequest HT (A2)	Unambiguous	NVQDAIADAEQRGEHALK		1	1	P35908	P35908	1	3	0.705	0	1	1	655.665	1964.98	1964.98	0.61	0.0004	HCD (High Energy Collision Dissociation)	MS2	0	6.682	31.2354	33094	WQR_1_20190806.raw	F4	4.17	0.0007925	0.04449
		FALSE	High	Sequest HT (A2)	Unambiguous	NVQDAIADAEQRGEHALK		1	1	P35908	P35908	1	3	0.6843	0	1	1	655.665	1964.98	1964.98	0.61	0.0004	HCD (High Energy Collision Dissociation)	MS2	4.4116	5.946	31.2316	33088	WQR_1_20190806.raw	F4	4.15	0.0007925	0.03208
	FALSE	High	NVQDAIADAEQRGEHALKDAR		0.00477958	0	1	1	3	P35908	2	2307.14	High	0	0.004066	4.23
		Checked	Confidence	Identifying Node	PSM Ambiguity	Annotated Sequence	Modifications	# Protein Groups	# Proteins	Master Protein Accessions	Protein Accessions	# Missed Cleavages	Charge	DeltaScore	DeltaCn	Rank	Search Engine Rank	m/z [Da]	MH+ [Da]	Theo. MH+ [Da]	DeltaM [ppm]	Deltam/z [Da]	Activation Type	MS Order	Isolation Interference [%]	Ion Inject Time [ms]	RT [min]	First Scan	Spectrum File	File ID	XCorr	Percolator q-Value	Percolator PEP
		FALSE	High	Sequest HT (A2)	Unambiguous	NVQDAIADAEQRGEHALKDAR		1	1	P35908	P35908	2	4	0.6194	0	1	1	577.542	2307.15	2307.14	1.31	0.00075	HCD (High Energy Collision Dissociation)	MS2	26.7804	18.598	33.7737	36245	WQR_1_20190806.raw	F4	4.23	0	0.004066
		FALSE	High	Sequest HT (A2)	Unambiguous	NVQDAIADAEQRGEHALKDAR		1	1	P35908	P35908	2	4	0.5602	0	1	1	577.542	2307.15	2307.14	0.78	0.00045	HCD (High Energy Collision Dissociation)	MS2	47.0726	6.364	33.8571	36349	WQR_1_20190806.raw	F4	2.66	0.0007925	0.07461
		FALSE	High	Sequest HT (A2)	Unambiguous	NVQDAIADAEQRGEHALKDAR		1	1	P35908	P35908	2	4	0.5349	0	1	1	577.542	2307.15	2307.14	1.31	0.00075	HCD (High Energy Collision Dissociation)	MS2	24.1787	10.581	33.7946	36270	WQR_1_20190806.raw	F4	3.87	0.0007925	0.03902
	FALSE	High	WELLQQMNVGTRPINLEPIFQGYIDSLKR	1xOxidation [M7]	0.00265363	0	1	1	1	P35908	1	3474.82	High	0	0.002199	5.04
		Checked	Confidence	Identifying Node	PSM Ambiguity	Annotated Sequence	Modifications	# Protein Groups	# Proteins	Master Protein Accessions	Protein Accessions	# Missed Cleavages	Charge	DeltaScore	DeltaCn	Rank	Search Engine Rank	m/z [Da]	MH+ [Da]	Theo. MH+ [Da]	DeltaM [ppm]	Deltam/z [Da]	Activation Type	MS Order	Isolation Interference [%]	Ion Inject Time [ms]	RT [min]	First Scan	Spectrum File	File ID	XCorr	Percolator q-Value	Percolator PEP
		FALSE	High	Sequest HT (A2)	Unambiguous	WELLQQmNVGTRPINLEPIFQGYIDSLKR	M7(Oxidation)	1	1	P35908	P35908	1	4	0.6528	0	1	1	869.46	3474.82	3474.82	-0.85	-0.00073	HCD (High Energy Collision Dissociation)	MS2	21.0378	29.67	52.8234	58402	WQR_1_20190806.raw	F4	5.04	0	0.002199
	FALSE	High	YEELQVTVGR		0.0212383	0	1	1	1	P35908	0	1193.62	High	0	0.01921	2.82
		Checked	Confidence	Identifying Node	PSM Ambiguity	Annotated Sequence	Modifications	# Protein Groups	# Proteins	Master Protein Accessions	Protein Accessions	# Missed Cleavages	Charge	DeltaScore	DeltaCn	Rank	Search Engine Rank	m/z [Da]	MH+ [Da]	Theo. MH+ [Da]	DeltaM [ppm]	Deltam/z [Da]	Activation Type	MS Order	Isolation Interference [%]	Ion Inject Time [ms]	RT [min]	First Scan	Spectrum File	File ID	XCorr	Percolator q-Value	Percolator PEP
		FALSE	High	Sequest HT (A2)	Unambiguous	YEELQVTVGR		1	1	P35908	P35908	0	2	0.6277	0	1	1	597.31	1193.61	1193.62	-2.1	-0.00125	HCD (High Energy Collision Dissociation)	MS2	68.3692	9.136	22.488	22376	WQR_1_20190806.raw	F4	2.82	0	0.01921
	FALSE	High	FGGFGGPGGVGGLGGPGGFGPGGYPGGIHEVSVNQSLLQPLNVK		0.000508215	0	1	1	1	P35908	0	4092.07	High	0	0.0003933	6.72
		Checked	Confidence	Identifying Node	PSM Ambiguity	Annotated Sequence	Modifications	# Protein Groups	# Proteins	Master Protein Accessions	Protein Accessions	# Missed Cleavages	Charge	DeltaScore	DeltaCn	Rank	Search Engine Rank	m/z [Da]	MH+ [Da]	Theo. MH+ [Da]	DeltaM [ppm]	Deltam/z [Da]	Activation Type	MS Order	Isolation Interference [%]	Ion Inject Time [ms]	RT [min]	First Scan	Spectrum File	File ID	XCorr	Percolator q-Value	Percolator PEP
		FALSE	High	Sequest HT (A2)	Unambiguous	FGGFGGPGGVGGLGGPGGFGPGGYPGGIHEVSVNQSLLQPLNVK		1	1	P35908	P35908	0	4	0.7351	0	1	1	1023.78	4092.08	4092.07	1.38	0.00141	HCD (High Energy Collision Dissociation)	MS2	0	45	49.5553	54842	WQR_1_20190806.raw	F4	6.72	0	0.0003933
	FALSE	High	FLEQQNQVLQTK		0.00230749	0	2	3	1	P35908; P04264	0	1475.79	High	0	0.001903	3.79
		Checked	Confidence	Identifying Node	PSM Ambiguity	Annotated Sequence	Modifications	# Protein Groups	# Proteins	Master Protein Accessions	Protein Accessions	# Missed Cleavages	Charge	DeltaScore	DeltaCn	Rank	Search Engine Rank	m/z [Da]	MH+ [Da]	Theo. MH+ [Da]	DeltaM [ppm]	Deltam/z [Da]	Activation Type	MS Order	Isolation Interference [%]	Ion Inject Time [ms]	RT [min]	First Scan	Spectrum File	File ID	XCorr	Percolator q-Value	Percolator PEP
		FALSE	High	Sequest HT (A2)	Unambiguous	FLEQQNQVLQTK		2	3	P35908; P04264	Q7Z794; P35908; P04264	0	2	0.7203	0	1	1	738.397	1475.79	1475.79	0.95	0.0007	HCD (High Energy Collision Dissociation)	MS2	11.5477	28.499	20.9631	20527	WQR_1_20190806.raw	F4	3.79	0	0.001903
	FALSE	High	HGGGGGGFGGGGFGSR		0.0203612	0	1	1	1	P35908	0	1320.58	High	0	0.01836	4.12
		Checked	Confidence	Identifying Node	PSM Ambiguity	Annotated Sequence	Modifications	# Protein Groups	# Proteins	Master Protein Accessions	Protein Accessions	# Missed Cleavages	Charge	DeltaScore	DeltaCn	Rank	Search Engine Rank	m/z [Da]	MH+ [Da]	Theo. MH+ [Da]	DeltaM [ppm]	Deltam/z [Da]	Activation Type	MS Order	Isolation Interference [%]	Ion Inject Time [ms]	RT [min]	First Scan	Spectrum File	File ID	XCorr	Percolator q-Value	Percolator PEP
		FALSE	High	Sequest HT (A2)	Unambiguous	HGGGGGGFGGGGFGSR		1	1	P35908	P35908	0	3	0.7718	0	1	1	440.866	1320.58	1320.58	-0.09	-4e-05	HCD (High Energy Collision Dissociation)	MS2	0	5.098	13.3025	11587	WQR_1_20190806.raw	F4	4.12	0	0.01836
	FALSE	High	GGSISGGGYGSGGGK		0.0134642	0	1	1	1	P35908	0	1197.55	High	0	0.01196	2.84
		Checked	Confidence	Identifying Node	PSM Ambiguity	Annotated Sequence	Modifications	# Protein Groups	# Proteins	Master Protein Accessions	Protein Accessions	# Missed Cleavages	Charge	DeltaScore	DeltaCn	Rank	Search Engine Rank	m/z [Da]	MH+ [Da]	Theo. MH+ [Da]	DeltaM [ppm]	Deltam/z [Da]	Activation Type	MS Order	Isolation Interference [%]	Ion Inject Time [ms]	RT [min]	First Scan	Spectrum File	File ID	XCorr	Percolator q-Value	Percolator PEP
		FALSE	High	Sequest HT (A2)	Unambiguous	GGSISGGGYGSGGGK		1	1	P35908	P35908	0	2	0.662	0	1	1	599.279	1197.55	1197.55	1.66	0.00099	HCD (High Energy Collision Dissociation)	MS2	0	45	9.0487	6625	WQR_1_20190806.raw	F4	2.84	0	0.01196
	FALSE	High	VLYDAEISQIHQSVTDTNVILSMDNSR	1xOxidation [M23]	1.44367e-05	0	1	1	2	P35908	0	3064.49	High	0	9.626e-06	6.54
		Checked	Confidence	Identifying Node	PSM Ambiguity	Annotated Sequence	Modifications	# Protein Groups	# Proteins	Master Protein Accessions	Protein Accessions	# Missed Cleavages	Charge	DeltaScore	DeltaCn	Rank	Search Engine Rank	m/z [Da]	MH+ [Da]	Theo. MH+ [Da]	DeltaM [ppm]	Deltam/z [Da]	Activation Type	MS Order	Isolation Interference [%]	Ion Inject Time [ms]	RT [min]	First Scan	Spectrum File	File ID	XCorr	Percolator q-Value	Percolator PEP
		FALSE	High	Sequest HT (A2)	Unambiguous	VLYDAEISQIHQSVTDTNVILSmDNSR	M23(Oxidation)	1	1	P35908	P35908	0	3	0.6758	0	1	1	1022.17	3064.49	3064.49	0.12	0.00012	HCD (High Energy Collision Dissociation)	MS2	0	36.025	40.7657	44634	WQR_1_20190806.raw	F4	6.54	0	9.626e-06
		FALSE	High	Sequest HT (A2)	Unambiguous	VLYDAEISQIHQSVTDTNVILSmDNSR	M23(Oxidation)	1	1	P35908	P35908	0	3	0.6704	0	1	1	1022.17	3064.49	3064.49	1.37	0.0014	HCD (High Energy Collision Dissociation)	MS2	0	38.026	40.7566	44624	WQR_1_20190806.raw	F4	6.31	0	3.026e-05
	FALSE	High	GGSGGGGSISGGGYGSGGGSGGR		0.0205337	0	1	1	1	P35908	0	1741.75	High	0	0.01849	2.32
		Checked	Confidence	Identifying Node	PSM Ambiguity	Annotated Sequence	Modifications	# Protein Groups	# Proteins	Master Protein Accessions	Protein Accessions	# Missed Cleavages	Charge	DeltaScore	DeltaCn	Rank	Search Engine Rank	m/z [Da]	MH+ [Da]	Theo. MH+ [Da]	DeltaM [ppm]	Deltam/z [Da]	Activation Type	MS Order	Isolation Interference [%]	Ion Inject Time [ms]	RT [min]	First Scan	Spectrum File	File ID	XCorr	Percolator q-Value	Percolator PEP
		FALSE	High	Sequest HT (A2)	Unambiguous	GGSGGGGSISGGGYGSGGGSGGR		1	1	P35908	P35908	0	2	0.7888	0	1	1	871.379	1741.75	1741.75	1.55	0.00135	HCD (High Energy Collision Dissociation)	MS2	0	45	9.9027	7621	WQR_1_20190806.raw	F4	2.32	0	0.01849
	FALSE	High	GGGFGGGSSFGGGSGFSGGGFGGGGFGGGR		4.69151e-05	0	1	1	1	P35908	0	2399.02	High	0	3.288e-05	6.66
		Checked	Confidence	Identifying Node	PSM Ambiguity	Annotated Sequence	Modifications	# Protein Groups	# Proteins	Master Protein Accessions	Protein Accessions	# Missed Cleavages	Charge	DeltaScore	DeltaCn	Rank	Search Engine Rank	m/z [Da]	MH+ [Da]	Theo. MH+ [Da]	DeltaM [ppm]	Deltam/z [Da]	Activation Type	MS Order	Isolation Interference [%]	Ion Inject Time [ms]	RT [min]	First Scan	Spectrum File	File ID	XCorr	Percolator q-Value	Percolator PEP
		FALSE	High	Sequest HT (A2)	Unambiguous	GGGFGGGSSFGGGSGFSGGGFGGGGFGGGR		1	1	P35908	P35908	0	2	0.8168	0	1	1	1200.02	2399.02	2399.02	2.52	0.00303	HCD (High Energy Collision Dissociation)	MS2	26.7197	38.164	36.3511	39380	WQR_1_20190806.raw	F4	6.66	0	3.288e-05
	FALSE	High	GFSSGSAVVSGGSR		0.0255662	0	1	1	1	P35908	0	1254.61	High	0	0.02326	3.53
		Checked	Confidence	Identifying Node	PSM Ambiguity	Annotated Sequence	Modifications	# Protein Groups	# Proteins	Master Protein Accessions	Protein Accessions	# Missed Cleavages	Charge	DeltaScore	DeltaCn	Rank	Search Engine Rank	m/z [Da]	MH+ [Da]	Theo. MH+ [Da]	DeltaM [ppm]	Deltam/z [Da]	Activation Type	MS Order	Isolation Interference [%]	Ion Inject Time [ms]	RT [min]	First Scan	Spectrum File	File ID	XCorr	Percolator q-Value	Percolator PEP
		FALSE	High	Sequest HT (A2)	Unambiguous	GFSSGSAVVSGGSR		1	1	P35908	P35908	0	2	0.7139	0	1	1	627.808	1254.61	1254.61	1.2	0.00075	HCD (High Energy Collision Dissociation)	MS2	11.9521	11.705	14.105	12528	WQR_1_20190806.raw	F4	3.53	0	0.02326
	FALSE	High	VLYDAEISQIHQSVTDTNVILSMDNSR		1.16791e-05	0	1	1	2	P35908	0	3048.49	High	0	7.742e-06	7.01
		Checked	Confidence	Identifying Node	PSM Ambiguity	Annotated Sequence	Modifications	# Protein Groups	# Proteins	Master Protein Accessions	Protein Accessions	# Missed Cleavages	Charge	DeltaScore	DeltaCn	Rank	Search Engine Rank	m/z [Da]	MH+ [Da]	Theo. MH+ [Da]	DeltaM [ppm]	Deltam/z [Da]	Activation Type	MS Order	Isolation Interference [%]	Ion Inject Time [ms]	RT [min]	First Scan	Spectrum File	File ID	XCorr	Percolator q-Value	Percolator PEP
		FALSE	High	Sequest HT (A2)	Unambiguous	VLYDAEISQIHQSVTDTNVILSMDNSR		1	1	P35908	P35908	0	3	0.7347	0	1	1	1016.84	3048.5	3048.49	3.46	0.00351	HCD (High Energy Collision Dissociation)	MS2	0	45	44.2861	48766	WQR_1_20190806.raw	F4	7.01	0	7.742e-06
		FALSE	High	Sequest HT (A2)	Unambiguous	VLYDAEISQIHQSVTDTNVILSMDNSR		1	1	P35908	P35908	0	3	0.6362	0	1	1	1016.83	3048.49	3048.49	-1.35	-0.00137	HCD (High Energy Collision Dissociation)	MS2	0	45	44.3042	48787	WQR_1_20190806.raw	F4	6.13	0	0.001637
	FALSE	High	GSSSGGGYSSGSSSYGSGGR		0.000148002	0	1	1	1	P35908	0	1740.71	High	0	0.0001087	5.02
		Checked	Confidence	Identifying Node	PSM Ambiguity	Annotated Sequence	Modifications	# Protein Groups	# Proteins	Master Protein Accessions	Protein Accessions	# Missed Cleavages	Charge	DeltaScore	DeltaCn	Rank	Search Engine Rank	m/z [Da]	MH+ [Da]	Theo. MH+ [Da]	DeltaM [ppm]	Deltam/z [Da]	Activation Type	MS Order	Isolation Interference [%]	Ion Inject Time [ms]	RT [min]	First Scan	Spectrum File	File ID	XCorr	Percolator q-Value	Percolator PEP
		FALSE	High	Sequest HT (A2)	Unambiguous	GSSSGGGYSSGSSSYGSGGR		1	1	P35908	P35908	0	2	0.8486	0	1	1	870.857	1740.71	1740.71	0.23	0.0002	HCD (High Energy Collision Dissociation)	MS2	0	45	9.2374	6854	WQR_1_20190806.raw	F4	5.02	0	0.0001087
	FALSE	High	STSSFSCLSR	1xCarbamidomethyl [C7]	0.0682093	0.00152962	1	1	2	P35908	0	1131.51	High	0.0007925	0.06442	2.6
		Checked	Confidence	Identifying Node	PSM Ambiguity	Annotated Sequence	Modifications	# Protein Groups	# Proteins	Master Protein Accessions	Protein Accessions	# Missed Cleavages	Charge	DeltaScore	DeltaCn	Rank	Search Engine Rank	m/z [Da]	MH+ [Da]	Theo. MH+ [Da]	DeltaM [ppm]	Deltam/z [Da]	Activation Type	MS Order	Isolation Interference [%]	Ion Inject Time [ms]	RT [min]	First Scan	Spectrum File	File ID	XCorr	Percolator q-Value	Percolator PEP
		FALSE	High	Sequest HT (A2)	Unambiguous	STSSFScLSR	C7(Carbamidomethyl)	1	1	P35908	P35908	0	2	0.5462	0	1	1	566.258	1131.51	1131.51	-0.18	-0.0001	HCD (High Energy Collision Dissociation)	MS2	0	13.655	16.6752	15461	WQR_1_20190806.raw	F4	2.6	0.0007925	0.06442
		FALSE	High	Sequest HT (A2)	Unambiguous	STSSFScLSR	C7(Carbamidomethyl)	1	1	P35908	P35908	0	2	0.5605	0	1	1	566.258	1131.51	1131.51	-0.18	-0.0001	HCD (High Energy Collision Dissociation)	MS2	0	10.561	16.6726	15458	WQR_1_20190806.raw	F4	2.48	0.001475	0.1051
	FALSE	High	TAAENDFVTLK		0.0410898	0.00152962	1	1	1	P35908	0	1208.62	High	0.0007925	0.03796	2.25
		Checked	Confidence	Identifying Node	PSM Ambiguity	Annotated Sequence	Modifications	# Protein Groups	# Proteins	Master Protein Accessions	Protein Accessions	# Missed Cleavages	Charge	DeltaScore	DeltaCn	Rank	Search Engine Rank	m/z [Da]	MH+ [Da]	Theo. MH+ [Da]	DeltaM [ppm]	Deltam/z [Da]	Activation Type	MS Order	Isolation Interference [%]	Ion Inject Time [ms]	RT [min]	First Scan	Spectrum File	File ID	XCorr	Percolator q-Value	Percolator PEP
		FALSE	High	Sequest HT (A2)	Unambiguous	TAAENDFVTLK		1	1	P35908	P35908	0	2	0.6044	0	1	1	604.812	1208.62	1208.62	1.13	0.00068	HCD (High Energy Collision Dissociation)	MS2	50.7244	7.476	23.319	23406	WQR_1_20190806.raw	F4	2.25	0.0007925	0.03796
	FALSE	High	KYEDEINKR		0.0448576	0.00152962	1	3	1	P35908	2	1194.61	High	0.0007925	0.04162	3.74
		Checked	Confidence	Identifying Node	PSM Ambiguity	Annotated Sequence	Modifications	# Protein Groups	# Proteins	Master Protein Accessions	Protein Accessions	# Missed Cleavages	Charge	DeltaScore	DeltaCn	Rank	Search Engine Rank	m/z [Da]	MH+ [Da]	Theo. MH+ [Da]	DeltaM [ppm]	Deltam/z [Da]	Activation Type	MS Order	Isolation Interference [%]	Ion Inject Time [ms]	RT [min]	First Scan	Spectrum File	File ID	XCorr	Percolator q-Value	Percolator PEP
		FALSE	High	Sequest HT (A2)	Unambiguous	KYEDEINKR		1	3	P35908	P35908; Q01546; P12035	2	3	0.7005	0	1	1	398.875	1194.61	1194.61	0.26	0.0001	HCD (High Energy Collision Dissociation)	MS2	3.5535	6.277	8.3503	5784	WQR_1_20190806.raw	F4	3.74	0.0007925	0.04162
	FALSE	High	KDVDNAYMIK	1xOxidation [M8]	0.0419578	0.00152962	1	1	1	P35908	1	1212.59	High	0.0007925	0.0388	2.69
		Checked	Confidence	Identifying Node	PSM Ambiguity	Annotated Sequence	Modifications	# Protein Groups	# Proteins	Master Protein Accessions	Protein Accessions	# Missed Cleavages	Charge	DeltaScore	DeltaCn	Rank	Search Engine Rank	m/z [Da]	MH+ [Da]	Theo. MH+ [Da]	DeltaM [ppm]	Deltam/z [Da]	Activation Type	MS Order	Isolation Interference [%]	Ion Inject Time [ms]	RT [min]	First Scan	Spectrum File	File ID	XCorr	Percolator q-Value	Percolator PEP
		FALSE	High	Sequest HT (A2)	Unambiguous	KDVDNAYmIK	M8(Oxidation)	1	1	P35908	P35908	1	2	0.5093	0	1	1	606.801	1212.6	1212.59	1.75	0.00106	HCD (High Energy Collision Dissociation)	MS2	0	45	11.9159	9961	WQR_1_20190806.raw	F4	2.69	0.0007925	0.0388
	FALSE	High	DYQELMNVK		0.0592695	0.00152962	1	4	1	P35908	0	1139.54	High	0.0007925	0.05571	1.95
		Checked	Confidence	Identifying Node	PSM Ambiguity	Annotated Sequence	Modifications	# Protein Groups	# Proteins	Master Protein Accessions	Protein Accessions	# Missed Cleavages	Charge	DeltaScore	DeltaCn	Rank	Search Engine Rank	m/z [Da]	MH+ [Da]	Theo. MH+ [Da]	DeltaM [ppm]	Deltam/z [Da]	Activation Type	MS Order	Isolation Interference [%]	Ion Inject Time [ms]	RT [min]	First Scan	Spectrum File	File ID	XCorr	Percolator q-Value	Percolator PEP
		FALSE	High	Sequest HT (A2)	Unambiguous	DYQELMNVK		1	4	P35908	Q5XKE5; P35908; Q01546; P12035	0	2	0.5282	0	1	1	570.274	1139.54	1139.54	0.06	4e-05	HCD (High Energy Collision Dissociation)	MS2	58.5412	6.375	26.1672	26847	WQR_1_20190806.raw	F4	1.95	0.0007925	0.05571
	FALSE	High	NLDLDSIIAEVK		0.0279296	0.00152962	3	7	1	P35908; P02538; P13647	0	1329.73	High	0.0007925	0.02544	3.08
		Checked	Confidence	Identifying Node	PSM Ambiguity	Annotated Sequence	Modifications	# Protein Groups	# Proteins	Master Protein Accessions	Protein Accessions	# Missed Cleavages	Charge	DeltaScore	DeltaCn	Rank	Search Engine Rank	m/z [Da]	MH+ [Da]	Theo. MH+ [Da]	DeltaM [ppm]	Deltam/z [Da]	Activation Type	MS Order	Isolation Interference [%]	Ion Inject Time [ms]	RT [min]	First Scan	Spectrum File	File ID	XCorr	Percolator q-Value	Percolator PEP
		FALSE	High	Sequest HT (A2)	Unambiguous	NLDLDSIIAEVK		3	7	P35908; P02538; P13647	Q5XKE5; P35908; P04259; P02538; O95678; P48668; P13647	0	2	0.5779	0	1	1	665.367	1329.73	1329.73	0.9	0.0006	HCD (High Energy Collision Dissociation)	MS2	53.1825	45	47.583	52579	WQR_1_20190806.raw	F4	3.08	0.0007925	0.02544
	FALSE	High	YEDEINKR		0.113577	0.00267473	4	11	1	P35908; P04264; P02538; P13647	1	1066.52	High	0.001475	0.1088	2.3
		Checked	Confidence	Identifying Node	PSM Ambiguity	Annotated Sequence	Modifications	# Protein Groups	# Proteins	Master Protein Accessions	Protein Accessions	# Missed Cleavages	Charge	DeltaScore	DeltaCn	Rank	Search Engine Rank	m/z [Da]	MH+ [Da]	Theo. MH+ [Da]	DeltaM [ppm]	Deltam/z [Da]	Activation Type	MS Order	Isolation Interference [%]	Ion Inject Time [ms]	RT [min]	First Scan	Spectrum File	File ID	XCorr	Percolator q-Value	Percolator PEP
		FALSE	High	Sequest HT (A2)	Unambiguous	YEDEINKR		4	11	P35908; P04264; P02538; P13647	Q7Z794; P35908; P04264; P04259; P02538; Q01546; O95678; P48668; P12035; P05787; P13647	1	2	0.687	0	1	1	533.762	1066.52	1066.52	1.07	0.00057	HCD (High Energy Collision Dissociation)	MS2	0	7.963	8.5711	6052	WQR_1_20190806.raw	F4	2.3	0.001475	0.1088
	FALSE	High	AQYEEIAQR		0.0861848	0.00267473	2	6	1	P35908; P02538	0	1107.54	High	0.001475	0.08184	2.43
		Checked	Confidence	Identifying Node	PSM Ambiguity	Annotated Sequence	Modifications	# Protein Groups	# Proteins	Master Protein Accessions	Protein Accessions	# Missed Cleavages	Charge	DeltaScore	DeltaCn	Rank	Search Engine Rank	m/z [Da]	MH+ [Da]	Theo. MH+ [Da]	DeltaM [ppm]	Deltam/z [Da]	Activation Type	MS Order	Isolation Interference [%]	Ion Inject Time [ms]	RT [min]	First Scan	Spectrum File	File ID	XCorr	Percolator q-Value	Percolator PEP
		FALSE	High	Sequest HT (A2)	Unambiguous	AQYEEIAQR		2	6	P35908; P02538	P35908; P04259; P02538; Q01546; P48668; P19013	0	2	0.7119	0	1	1	554.276	1107.54	1107.54	1.53	0.00085	HCD (High Energy Collision Dissociation)	MS2	0	7.857	13.3224	11608	WQR_1_20190806.raw	F4	2.43	0.001475	0.08184
	FALSE	High	DVDNAYMIK		0.137688	0.00267473	1	1	1	P35908	0	1068.5	High	0.002119	0.1327	1.88
		Checked	Confidence	Identifying Node	PSM Ambiguity	Annotated Sequence	Modifications	# Protein Groups	# Proteins	Master Protein Accessions	Protein Accessions	# Missed Cleavages	Charge	DeltaScore	DeltaCn	Rank	Search Engine Rank	m/z [Da]	MH+ [Da]	Theo. MH+ [Da]	DeltaM [ppm]	Deltam/z [Da]	Activation Type	MS Order	Isolation Interference [%]	Ion Inject Time [ms]	RT [min]	First Scan	Spectrum File	File ID	XCorr	Percolator q-Value	Percolator PEP
		FALSE	High	Sequest HT (A2)	Unambiguous	DVDNAYMIK		1	1	P35908	P35908	0	2	0.5532	0	1	1	534.755	1068.5	1068.5	0.19	0.0001	HCD (High Energy Collision Dissociation)	MS2	44.1229	14.383	21.1398	20763	WQR_1_20190806.raw	F4	1.88	0.002119	0.1327
	FALSE	High	FASFIDKVR		0.106041	0.00267473	3	17	1	P35908; P02538; P13647	1	1082.6	High	0.001475	0.1017	2.35
		Checked	Confidence	Identifying Node	PSM Ambiguity	Annotated Sequence	Modifications	# Protein Groups	# Proteins	Master Protein Accessions	Protein Accessions	# Missed Cleavages	Charge	DeltaScore	DeltaCn	Rank	Search Engine Rank	m/z [Da]	MH+ [Da]	Theo. MH+ [Da]	DeltaM [ppm]	Deltam/z [Da]	Activation Type	MS Order	Isolation Interference [%]	Ion Inject Time [ms]	RT [min]	First Scan	Spectrum File	File ID	XCorr	Percolator q-Value	Percolator PEP
		FALSE	High	Sequest HT (A2)	Unambiguous	FASFIDKVR		3	17	P35908; P02538; P13647	Q5XKE5; P08729; Q7Z794; Q7RTS7; Q86Y46; P35908; P04259; P02538; Q01546; O95678; P48668; Q9NSB2; P12035; Q3SY84; Q14CN4; P05787; P13647	1	3	0.2979	0	1	1	361.538	1082.6	1082.6	-0.65	-0.00023	HCD (High Energy Collision Dissociation)	MS2	90.4058	15.85	23.7029	23863	WQR_1_20190806.raw	F4	2.35	0.001475	0.1017
	FALSE	High	IEISELNR		0.150283	0.00381703	2	2	1	P35908; P04264	0	973.531	High	0.002731	0.1457	2.22
		Checked	Confidence	Identifying Node	PSM Ambiguity	Annotated Sequence	Modifications	# Protein Groups	# Proteins	Master Protein Accessions	Protein Accessions	# Missed Cleavages	Charge	DeltaScore	DeltaCn	Rank	Search Engine Rank	m/z [Da]	MH+ [Da]	Theo. MH+ [Da]	DeltaM [ppm]	Deltam/z [Da]	Activation Type	MS Order	Isolation Interference [%]	Ion Inject Time [ms]	RT [min]	First Scan	Spectrum File	File ID	XCorr	Percolator q-Value	Percolator PEP
		FALSE	High	Sequest HT (A2)	Unambiguous	IEISELNR		2	2	P35908; P04264	P35908; P04264	0	2	0.1937	0	1	1	487.269	973.532	973.531	0.33	0.00016	HCD (High Energy Collision Dissociation)	MS2	19.8642	6.571	20.7986	20316	WQR_1_20190806.raw	F4	2.22	0.002731	0.1457
	FALSE	High	DVDNAYMIK	1xOxidation [M7]	0.158851	0.00381703	1	1	2	P35908	0	1084.5	High	0.00453	0.2344	2.33
		Checked	Confidence	Identifying Node	PSM Ambiguity	Annotated Sequence	Modifications	# Protein Groups	# Proteins	Master Protein Accessions	Protein Accessions	# Missed Cleavages	Charge	DeltaScore	DeltaCn	Rank	Search Engine Rank	m/z [Da]	MH+ [Da]	Theo. MH+ [Da]	DeltaM [ppm]	Deltam/z [Da]	Activation Type	MS Order	Isolation Interference [%]	Ion Inject Time [ms]	RT [min]	First Scan	Spectrum File	File ID	XCorr	Percolator q-Value	Percolator PEP
		FALSE	High	Sequest HT (A2)	Unambiguous	DVDNAYmIK	M7(Oxidation)	1	1	P35908	P35908	0	2	0.493	0	1	1	542.752	1084.5	1084.5	-0.42	-0.00023	HCD (High Energy Collision Dissociation)	MS2	12.2491	26.822	16.8717	15681	WQR_1_20190806.raw	F4	2.15	0.002731	0.1538
		FALSE	High	Sequest HT (A2)	Unambiguous	DVDNAYmIK	M7(Oxidation)	1	1	P35908	P35908	0	2	0.5622	0	1	1	542.754	1084.5	1084.5	3.07	0.00167	HCD (High Energy Collision Dissociation)	MS2	0	43.554	16.7873	15584	WQR_1_20190806.raw	F4	2.33	0.00453	0.2344
	FALSE	High	SKEEAEALYHSKYEELQVTVGR		0.222777	0.00596215	1	1	1	P35908	2	2566.28	High	0.00393	0.2182	3.1
		Checked	Confidence	Identifying Node	PSM Ambiguity	Annotated Sequence	Modifications	# Protein Groups	# Proteins	Master Protein Accessions	Protein Accessions	# Missed Cleavages	Charge	DeltaScore	DeltaCn	Rank	Search Engine Rank	m/z [Da]	MH+ [Da]	Theo. MH+ [Da]	DeltaM [ppm]	Deltam/z [Da]	Activation Type	MS Order	Isolation Interference [%]	Ion Inject Time [ms]	RT [min]	First Scan	Spectrum File	File ID	XCorr	Percolator q-Value	Percolator PEP
		FALSE	High	Sequest HT (A2)	Unambiguous	SKEEAEALYHSKYEELQVTVGR		1	1	P35908	P35908	2	4	0.4839	0	1	1	642.325	2566.28	2566.28	-0.25	-0.00016	HCD (High Energy Collision Dissociation)	MS2	58.0714	10.217	26.0507	26709	WQR_1_20190806.raw	F4	3.1	0.00393	0.2182
	FALSE	High	SLVGLGGTK		0.227051	0.00596215	1	1	1	P35908	0	831.493	High	0.00393	0.2223	1.68
		Checked	Confidence	Identifying Node	PSM Ambiguity	Annotated Sequence	Modifications	# Protein Groups	# Proteins	Master Protein Accessions	Protein Accessions	# Missed Cleavages	Charge	DeltaScore	DeltaCn	Rank	Search Engine Rank	m/z [Da]	MH+ [Da]	Theo. MH+ [Da]	DeltaM [ppm]	Deltam/z [Da]	Activation Type	MS Order	Isolation Interference [%]	Ion Inject Time [ms]	RT [min]	First Scan	Spectrum File	File ID	XCorr	Percolator q-Value	Percolator PEP
		FALSE	High	Sequest HT (A2)	Unambiguous	SLVGLGGTK		1	1	P35908	P35908	0	2	0.5	0	1	1	416.251	831.494	831.493	0.75	0.00031	HCD (High Energy Collision Dissociation)	MS2	74.0388	5.314	17.3715	16276	WQR_1_20190806.raw	F4	1.68	0.00393	0.2223
FALSE	High	Master Protein	P11021	Endoplasmic reticulum chaperone BiP OS=Homo sapiens OX=9606 GN=HSPA5 PE=1 SV=2	0	87.726	49	33	82	31	1	654	72.3	5.16	295.81	33
	Checked	Confidence	Sequence	Modifications	Qvality PEP	Qvality q-value	# Protein Groups	# Proteins	# PSMs	Master Protein Accessions	# Missed Cleavages	Theo. MH+ [Da]	Confidence (by Search Engine): Sequest HT	Percolator q-Value (by Search Engine): Sequest HT	Percolator PEP (by Search Engine): Sequest HT	XCorr (by Search Engine): Sequest HT
	FALSE	High	TWNDPSVQQDIK		0.00637267	0	1	1	3	P11021	0	1430.69	High	0	0.005504	3.49
		Checked	Confidence	Identifying Node	PSM Ambiguity	Annotated Sequence	Modifications	# Protein Groups	# Proteins	Master Protein Accessions	Protein Accessions	# Missed Cleavages	Charge	DeltaScore	DeltaCn	Rank	Search Engine Rank	m/z [Da]	MH+ [Da]	Theo. MH+ [Da]	DeltaM [ppm]	Deltam/z [Da]	Activation Type	MS Order	Isolation Interference [%]	Ion Inject Time [ms]	RT [min]	First Scan	Spectrum File	File ID	XCorr	Percolator q-Value	Percolator PEP
		FALSE	High	Sequest HT (A2)	Unambiguous	TWNDPSVQQDIK		1	1	P11021	P11021	0	2	0.702	0	1	1	715.85	1430.69	1430.69	1.57	0.00113	HCD (High Energy Collision Dissociation)	MS2	33.6581	6.897	21.5677	21262	WQR_1_20190806.raw	F4	3.49	0	0.005504
		FALSE	High	Sequest HT (A2)	Unambiguous	TWNDPSVQQDIK		1	1	P11021	P11021	0	2	0.6905	0	1	1	715.85	1430.69	1430.69	1.4	0.001	HCD (High Energy Collision Dissociation)	MS2	24.8914	43.146	21.5545	21248	WQR_1_20190806.raw	F4	3.36	0	0.005491
		FALSE	High	Sequest HT (A2)	Unambiguous	TWNDPSVQQDIK		1	1	P11021	P11021	0	2	0.7414	0	1	1	715.85	1430.69	1430.69	1.4	0.001	HCD (High Energy Collision Dissociation)	MS2	0	28.193	21.5523	21245	WQR_1_20190806.raw	F4	3.21	0	0.02042
	FALSE	High	MKETAEAYLGKK		0.00616065	0	1	1	1	P11021	2	1368.72	High	0	0.005289	3.71
		Checked	Confidence	Identifying Node	PSM Ambiguity	Annotated Sequence	Modifications	# Protein Groups	# Proteins	Master Protein Accessions	Protein Accessions	# Missed Cleavages	Charge	DeltaScore	DeltaCn	Rank	Search Engine Rank	m/z [Da]	MH+ [Da]	Theo. MH+ [Da]	DeltaM [ppm]	Deltam/z [Da]	Activation Type	MS Order	Isolation Interference [%]	Ion Inject Time [ms]	RT [min]	First Scan	Spectrum File	File ID	XCorr	Percolator q-Value	Percolator PEP
		FALSE	High	Sequest HT (A2)	Unambiguous	MKETAEAYLGKK		1	1	P11021	P11021	2	3	0.6442	0	1	1	456.912	1368.72	1368.72	1.57	0.00072	HCD (High Energy Collision Dissociation)	MS2	9.70243	43.689	12.3803	10500	WQR_1_20190806.raw	F4	3.71	0	0.005289
	FALSE	High	LYGSAGPPPTGEEDTAEKDEL		9.36317e-05	0	1	1	1	P11021	1	2175.99	High	0	6.771e-05	4.59
		Checked	Confidence	Identifying Node	PSM Ambiguity	Annotated Sequence	Modifications	# Protein Groups	# Proteins	Master Protein Accessions	Protein Accessions	# Missed Cleavages	Charge	DeltaScore	DeltaCn	Rank	Search Engine Rank	m/z [Da]	MH+ [Da]	Theo. MH+ [Da]	DeltaM [ppm]	Deltam/z [Da]	Activation Type	MS Order	Isolation Interference [%]	Ion Inject Time [ms]	RT [min]	First Scan	Spectrum File	File ID	XCorr	Percolator q-Value	Percolator PEP
		FALSE	High	Sequest HT (A2)	Unambiguous	LYGSAGPPPTGEEDTAEKDEL		1	1	P11021	P11021	1	2	0.793	0	1	1	1088.5	2176	2175.99	1.87	0.00203	HCD (High Energy Collision Dissociation)	MS2	0	45	24.4996	24839	WQR_1_20190806.raw	F4	4.59	0	6.771e-05
	FALSE	High	IEIESFYEGEDFSETLTR		3.10971e-05	0	1	1	3	P11021	0	2164.99	High	0	2.145e-05	5.05
		Checked	Confidence	Identifying Node	PSM Ambiguity	Annotated Sequence	Modifications	# Protein Groups	# Proteins	Master Protein Accessions	Protein Accessions	# Missed Cleavages	Charge	DeltaScore	DeltaCn	Rank	Search Engine Rank	m/z [Da]	MH+ [Da]	Theo. MH+ [Da]	DeltaM [ppm]	Deltam/z [Da]	Activation Type	MS Order	Isolation Interference [%]	Ion Inject Time [ms]	RT [min]	First Scan	Spectrum File	File ID	XCorr	Percolator q-Value	Percolator PEP
		FALSE	High	Sequest HT (A2)	Unambiguous	IEIESFYEGEDFSETLTR		1	1	P11021	P11021	0	2	0.7722	0	1	1	1083	2165	2164.99	3.34	0.00361	HCD (High Energy Collision Dissociation)	MS2	7.23998	26.303	44.2367	48710	WQR_1_20190806.raw	F4	4.74	0	8.207e-05
		FALSE	High	Sequest HT (A2)	Unambiguous	IEIESFYEGEDFSETLTR		1	1	P11021	P11021	0	2	0.7662	0	1	1	1083	2165	2164.99	3.34	0.00361	HCD (High Energy Collision Dissociation)	MS2	0	15.366	44.2346	48707	WQR_1_20190806.raw	F4	4.79	0	2.639e-05
		FALSE	High	Sequest HT (A2)	Unambiguous	IEIESFYEGEDFSETLTR		1	1	P11021	P11021	0	2	0.7406	0	1	1	1083	2164.99	2164.99	-0.95	-0.00102	HCD (High Energy Collision Dissociation)	MS2	0	45	44.2286	48701	WQR_1_20190806.raw	F4	5.05	0	2.145e-05
	FALSE	High	IEWLESHQDADIEDFK		8.45736e-05	0	1	1	3	P11021	0	1974.91	High	0	0.0002408	5.56
		Checked	Confidence	Identifying Node	PSM Ambiguity	Annotated Sequence	Modifications	# Protein Groups	# Proteins	Master Protein Accessions	Protein Accessions	# Missed Cleavages	Charge	DeltaScore	DeltaCn	Rank	Search Engine Rank	m/z [Da]	MH+ [Da]	Theo. MH+ [Da]	DeltaM [ppm]	Deltam/z [Da]	Activation Type	MS Order	Isolation Interference [%]	Ion Inject Time [ms]	RT [min]	First Scan	Spectrum File	File ID	XCorr	Percolator q-Value	Percolator PEP
		FALSE	High	Sequest HT (A2)	Unambiguous	IEWLESHQDADIEDFK		1	1	P11021	P11021	0	3	0.6321	0	1	1	658.975	1974.91	1974.91	0.66	0.00044	HCD (High Energy Collision Dissociation)	MS2	8.75237	6.016	34.3283	36932	WQR_1_20190806.raw	F4	5.3	0	0.0002571
		FALSE	High	Sequest HT (A2)	Unambiguous	IEWLESHQDADIEDFK		1	1	P11021	P11021	0	2	0.742	0	1	1	987.961	1974.91	1974.91	3.11	0.00307	HCD (High Energy Collision Dissociation)	MS2	33.568	45	34.4406	37079	WQR_1_20190806.raw	F4	4.69	0	6.071e-05
		FALSE	High	Sequest HT (A2)	Unambiguous	IEWLESHQDADIEDFK		1	1	P11021	P11021	0	3	0.6205	0	1	1	658.976	1974.91	1974.91	2.15	0.00141	HCD (High Energy Collision Dissociation)	MS2	17.3339	13.145	34.3043	36901	WQR_1_20190806.raw	F4	5.56	0	0.0002408
	FALSE	High	KSDIDEIVLVGGSTR		4.85336e-05	0	1	1	5	P11021	1	1588.85	High	0	0.001184	5.36
		Checked	Confidence	Identifying Node	PSM Ambiguity	Annotated Sequence	Modifications	# Protein Groups	# Proteins	Master Protein Accessions	Protein Accessions	# Missed Cleavages	Charge	DeltaScore	DeltaCn	Rank	Search Engine Rank	m/z [Da]	MH+ [Da]	Theo. MH+ [Da]	DeltaM [ppm]	Deltam/z [Da]	Activation Type	MS Order	Isolation Interference [%]	Ion Inject Time [ms]	RT [min]	First Scan	Spectrum File	File ID	XCorr	Percolator q-Value	Percolator PEP
		FALSE	High	Sequest HT (A2)	Unambiguous	KSDIDEIVLVGGSTR		1	1	P11021	P11021	1	3	0.7969	0	1	1	530.289	1588.85	1588.85	-0.79	-0.00042	HCD (High Energy Collision Dissociation)	MS2	8.77135	9.237	27.6427	28704	WQR_1_20190806.raw	F4	4.58	0	0.0245
		FALSE	High	Sequest HT (A2)	Unambiguous	KSDIDEIVLVGGSTR		1	1	P11021	P11021	1	3	0.7875	0	1	1	530.289	1588.85	1588.85	-0.79	-0.00042	HCD (High Energy Collision Dissociation)	MS2	8.77135	10.179	27.6445	28707	WQR_1_20190806.raw	F4	4.47	0	0.02398
		FALSE	High	Sequest HT (A2)	Unambiguous	KSDIDEIVLVGGSTR		1	1	P11021	P11021	1	2	0.7724	0	1	1	794.93	1588.85	1588.85	-1.4	-0.00111	HCD (High Energy Collision Dissociation)	MS2	24.9921	30.213	27.6452	28708	WQR_1_20190806.raw	F4	5.36	0	0.001184
		FALSE	High	Sequest HT (A2)	Unambiguous	KSDIDEIVLVGGSTR		1	1	P11021	P11021	1	2	0.7767	0	1	1	794.93	1588.85	1588.85	-1.4	-0.00111	HCD (High Energy Collision Dissociation)	MS2	24.9921	32.593	27.646	28709	WQR_1_20190806.raw	F4	5.33	0	3.412e-05
		FALSE	High	Sequest HT (A2)	Unambiguous	KSDIDEIVLVGGSTR		1	1	P11021	P11021	1	2	0.7179	0	1	1	794.93	1588.85	1588.85	-0.25	-0.0002	HCD (High Energy Collision Dissociation)	MS2	0	45	27.6582	28724	WQR_1_20190806.raw	F4	4.68	0	0.006617
	FALSE	High	IEWLESHQDADIEDFKAK		0.00547254	0	1	1	1	P11021	1	2174.04	High	0	0.004677	5.6
		Checked	Confidence	Identifying Node	PSM Ambiguity	Annotated Sequence	Modifications	# Protein Groups	# Proteins	Master Protein Accessions	Protein Accessions	# Missed Cleavages	Charge	DeltaScore	DeltaCn	Rank	Search Engine Rank	m/z [Da]	MH+ [Da]	Theo. MH+ [Da]	DeltaM [ppm]	Deltam/z [Da]	Activation Type	MS Order	Isolation Interference [%]	Ion Inject Time [ms]	RT [min]	First Scan	Spectrum File	File ID	XCorr	Percolator q-Value	Percolator PEP
		FALSE	High	Sequest HT (A2)	Unambiguous	IEWLESHQDADIEDFKAK		1	1	P11021	P11021	1	3	0.7071	0	1	1	725.352	2174.04	2174.04	0.38	0.00028	HCD (High Energy Collision Dissociation)	MS2	0	13.346	30.4974	32154	WQR_1_20190806.raw	F4	5.6	0	0.004677
	FALSE	High	IINEPTAAAIAYGLDKR		0.00023694	0	1	1	5	P11021	1	1816	High	0	0.003697	4.51
		Checked	Confidence	Identifying Node	PSM Ambiguity	Annotated Sequence	Modifications	# Protein Groups	# Proteins	Master Protein Accessions	Protein Accessions	# Missed Cleavages	Charge	DeltaScore	DeltaCn	Rank	Search Engine Rank	m/z [Da]	MH+ [Da]	Theo. MH+ [Da]	DeltaM [ppm]	Deltam/z [Da]	Activation Type	MS Order	Isolation Interference [%]	Ion Inject Time [ms]	RT [min]	First Scan	Spectrum File	File ID	XCorr	Percolator q-Value	Percolator PEP
		FALSE	High	Sequest HT (A2)	Unambiguous	IINEPTAAAIAYGLDKR		1	1	P11021	P11021	1	3	0.7383	0	1	1	606.005	1816	1816	1.47	0.00089	HCD (High Energy Collision Dissociation)	MS2	4.31724	0.944	32.316	34442	WQR_1_20190806.raw	F4	4.05	0	0.0003344
		FALSE	High	Sequest HT (A2)	Unambiguous	IINEPTAAAIAYGLDKR		1	1	P11021	P11021	1	2	0.7991	0	1	1	908.503	1816	1816	1.31	0.00119	HCD (High Energy Collision Dissociation)	MS2	16.159	4.632	32.3593	34498	WQR_1_20190806.raw	F4	4.28	0	0.000178
		FALSE	High	Sequest HT (A2)	Unambiguous	IINEPTAAAIAYGLDKR		1	1	P11021	P11021	1	2	0.8027	0	1	1	908.503	1816	1816	1.31	0.00119	HCD (High Energy Collision Dissociation)	MS2	21.9728	4.729	32.3598	34499	WQR_1_20190806.raw	F4	4.51	0	0.003697
		FALSE	High	Sequest HT (A2)	Unambiguous	IINEPTAAAIAYGLDKR		1	1	P11021	P11021	1	3	0.709	0	1	1	606.004	1816	1816	1.07	0.00065	HCD (High Energy Collision Dissociation)	MS2	19.9043	1.02	32.4052	34556	WQR_1_20190806.raw	F4	3.23	0.0007925	0.04549
		FALSE	High	Sequest HT (A2)	Unambiguous	IINEPTAAAIAYGLDKR		1	1	P11021	P11021	1	2	0.78	0	1	1	908.503	1816	1816	1.31	0.00119	HCD (High Energy Collision Dissociation)	MS2	34.7565	8.627	32.361	34501	WQR_1_20190806.raw	F4	4.09	0.0007925	0.07205
	FALSE	High	IINEPTAAAIAYGLDK		0.000579593	0	3	4	7	P11142; P11021; P34931	0	1659.9	High	0	0.0004507	4.31
		Checked	Confidence	Identifying Node	PSM Ambiguity	Annotated Sequence	Modifications	# Protein Groups	# Proteins	Master Protein Accessions	Protein Accessions	# Missed Cleavages	Charge	DeltaScore	DeltaCn	Rank	Search Engine Rank	m/z [Da]	MH+ [Da]	Theo. MH+ [Da]	DeltaM [ppm]	Deltam/z [Da]	Activation Type	MS Order	Isolation Interference [%]	Ion Inject Time [ms]	RT [min]	First Scan	Spectrum File	File ID	XCorr	Percolator q-Value	Percolator PEP
		FALSE	High	Sequest HT (A2)	Unambiguous	IINEPTAAAIAYGLDK		3	4	P11142; P11021; P34931	P54652; P11142; P11021; P34931	0	2	0.6939	0	1	1	830.452	1659.9	1659.9	1.24	0.00103	HCD (High Energy Collision Dissociation)	MS2	17.5906	44.542	35.6121	38509	WQR_1_20190806.raw	F4	3.79	0	0.000612
		FALSE	High	Sequest HT (A2)	Unambiguous	IINEPTAAAIAYGLDK		3	4	P11142; P11021; P34931	P54652; P11142; P11021; P34931	0	2	0.7425	0	1	1	830.451	1659.89	1659.9	-0.23	-0.00019	HCD (High Energy Collision Dissociation)	MS2	16.5862	9.996	35.6192	38517	WQR_1_20190806.raw	F4	4.31	0	0.0004507
		FALSE	High	Sequest HT (A2)	Unambiguous	IINEPTAAAIAYGLDK		3	4	P11142; P11021; P34931	P54652; P11142; P11021; P34931	0	2	0.7022	0	1	1	830.452	1659.9	1659.9	1.16	0.00096	HCD (High Energy Collision Dissociation)	MS2	0	18.179	35.6461	38546	WQR_1_20190806.raw	F4	4.03	0	0.00159
		FALSE	High	Sequest HT (A2)	Unambiguous	IINEPTAAAIAYGLDK		3	4	P11142; P11021; P34931	P54652; P11142; P11021; P34931	0	2	0.6851	0	1	1	830.452	1659.9	1659.9	0.5	0.00042	HCD (High Energy Collision Dissociation)	MS2	8.18437	9.657	35.6838	38592	WQR_1_20190806.raw	F4	3.62	0	0.003142
		FALSE	High	Sequest HT (A2)	Unambiguous	IINEPTAAAIAYGLDK		3	4	P11142; P11021; P34931	P54652; P11142; P11021; P34931	0	3	0.5141	0	1	1	553.97	1659.89	1659.9	-0.35	-0.0002	HCD (High Energy Collision Dissociation)	MS2	13.2055	17.672	35.6878	38597	WQR_1_20190806.raw	F4	3.89	0	0.01924
		FALSE	High	Sequest HT (A2)	Unambiguous	IINEPTAAAIAYGLDK		3	4	P11142; P11021; P34931	P54652; P11142; P11021; P34931	0	3	0.518	0	1	1	553.971	1659.9	1659.9	2.07	0.00115	HCD (High Energy Collision Dissociation)	MS2	10.6604	19.177	35.7212	38634	WQR_1_20190806.raw	F4	3.88	0	0.002043
		FALSE	High	Sequest HT (A2)	Unambiguous	IINEPTAAAIAYGLDK		3	4	P11142; P11021; P34931	P54652; P11142; P11021; P34931	0	3	0.5364	0	1	1	553.971	1659.9	1659.9	2.18	0.00121	HCD (High Energy Collision Dissociation)	MS2	6.20173	5.205	35.7336	38649	WQR_1_20190806.raw	F4	1.51	0	0.0117
	FALSE	High	SDIDEIVLVGGSTR		0.00372345	0	1	1	1	P11021	0	1460.76	High	0	0.003134	3.51
		Checked	Confidence	Identifying Node	PSM Ambiguity	Annotated Sequence	Modifications	# Protein Groups	# Proteins	Master Protein Accessions	Protein Accessions	# Missed Cleavages	Charge	DeltaScore	DeltaCn	Rank	Search Engine Rank	m/z [Da]	MH+ [Da]	Theo. MH+ [Da]	DeltaM [ppm]	Deltam/z [Da]	Activation Type	MS Order	Isolation Interference [%]	Ion Inject Time [ms]	RT [min]	First Scan	Spectrum File	File ID	XCorr	Percolator q-Value	Percolator PEP
		FALSE	High	Sequest HT (A2)	Unambiguous	SDIDEIVLVGGSTR		1	1	P11021	P11021	0	2	0.6724	0	1	1	730.884	1460.76	1460.76	1.06	0.00078	HCD (High Energy Collision Dissociation)	MS2	64.7857	2.968	33.3336	35723	WQR_1_20190806.raw	F4	3.51	0	0.003134
	FALSE	High	SQIFSTASDNQPTVTIK		0.00016455	0	1	1	3	P11021	0	1836.93	High	0	0.0005245	4.56
		Checked	Confidence	Identifying Node	PSM Ambiguity	Annotated Sequence	Modifications	# Protein Groups	# Proteins	Master Protein Accessions	Protein Accessions	# Missed Cleavages	Charge	DeltaScore	DeltaCn	Rank	Search Engine Rank	m/z [Da]	MH+ [Da]	Theo. MH+ [Da]	DeltaM [ppm]	Deltam/z [Da]	Activation Type	MS Order	Isolation Interference [%]	Ion Inject Time [ms]	RT [min]	First Scan	Spectrum File	File ID	XCorr	Percolator q-Value	Percolator PEP
		FALSE	High	Sequest HT (A2)	Unambiguous	SQIFSTASDNQPTVTIK		1	1	P11021	P11021	0	2	0.7083	0	1	1	918.973	1836.94	1836.93	2.32	0.00213	HCD (High Energy Collision Dissociation)	MS2	0	4.982	27.0523	27939	WQR_1_20190806.raw	F4	4.56	0	0.0005245
		FALSE	High	Sequest HT (A2)	Unambiguous	SQIFSTASDNQPTVTIK		1	1	P11021	P11021	0	2	0.7027	0	1	1	918.973	1836.94	1836.93	2.78	0.00255	HCD (High Energy Collision Dissociation)	MS2	10.6745	3.736	27.1324	28040	WQR_1_20190806.raw	F4	4.44	0	0.0001218
		FALSE	High	Sequest HT (A2)	Unambiguous	SQIFSTASDNQPTVTIK		1	1	P11021	P11021	0	2	0.6934	0	1	1	918.972	1836.94	1836.93	2.12	0.00194	HCD (High Energy Collision Dissociation)	MS2	3.49751	6.352	27.1358	28043	WQR_1_20190806.raw	F4	4.11	0	0.0003959
	FALSE	High	NQLTSNPENTVFDAK		0.000760243	0	1	1	3	P11021	0	1677.81	High	0	0.0005973	4.38
		Checked	Confidence	Identifying Node	PSM Ambiguity	Annotated Sequence	Modifications	# Protein Groups	# Proteins	Master Protein Accessions	Protein Accessions	# Missed Cleavages	Charge	DeltaScore	DeltaCn	Rank	Search Engine Rank	m/z [Da]	MH+ [Da]	Theo. MH+ [Da]	DeltaM [ppm]	Deltam/z [Da]	Activation Type	MS Order	Isolation Interference [%]	Ion Inject Time [ms]	RT [min]	First Scan	Spectrum File	File ID	XCorr	Percolator q-Value	Percolator PEP
		FALSE	High	Sequest HT (A2)	Unambiguous	NQLTSNPENTVFDAK		1	1	P11021	P11021	0	2	0.6416	0	1	1	839.409	1677.81	1677.81	1.63	0.00137	HCD (High Energy Collision Dissociation)	MS2	0	42.815	24.7631	25162	WQR_1_20190806.raw	F4	4.38	0	0.0005973
		FALSE	High	Sequest HT (A2)	Unambiguous	NQLTSNPENTVFDAK		1	1	P11021	P11021	0	2	0.6027	0	1	1	839.408	1677.81	1677.81	0.32	0.00027	HCD (High Energy Collision Dissociation)	MS2	0	8.22	24.7675	25166	WQR_1_20190806.raw	F4	3.7	0	0.0006295
		FALSE	High	Sequest HT (A2)	Unambiguous	NQLTSNPENTVFDAK		1	1	P11021	P11021	0	2	0.595	0	1	1	839.408	1677.81	1677.81	0.32	0.00027	HCD (High Energy Collision Dissociation)	MS2	29.687	4.552	24.7842	25188	WQR_1_20190806.raw	F4	3.63	0	0.001282
	FALSE	High	NELESYAYSLK		0.0101884	0	1	1	1	P11021	0	1316.64	High	0	0.008949	2.46
		Checked	Confidence	Identifying Node	PSM Ambiguity	Annotated Sequence	Modifications	# Protein Groups	# Proteins	Master Protein Accessions	Protein Accessions	# Missed Cleavages	Charge	DeltaScore	DeltaCn	Rank	Search Engine Rank	m/z [Da]	MH+ [Da]	Theo. MH+ [Da]	DeltaM [ppm]	Deltam/z [Da]	Activation Type	MS Order	Isolation Interference [%]	Ion Inject Time [ms]	RT [min]	First Scan	Spectrum File	File ID	XCorr	Percolator q-Value	Percolator PEP
		FALSE	High	Sequest HT (A2)	Unambiguous	NELESYAYSLK		1	1	P11021	P11021	0	2	0.5894	0	1	1	658.821	1316.63	1316.64	-1.47	-0.00097	HCD (High Energy Collision Dissociation)	MS2	0	8.477	30.0563	31628	WQR_1_20190806.raw	F4	2.46	0	0.008949
	FALSE	High	TFAPEEISAMVLTK		0.0228167	0	1	1	1	P11021	0	1536.8	High	0	0.02064	2.49
		Checked	Confidence	Identifying Node	PSM Ambiguity	Annotated Sequence	Modifications	# Protein Groups	# Proteins	Master Protein Accessions	Protein Accessions	# Missed Cleavages	Charge	DeltaScore	DeltaCn	Rank	Search Engine Rank	m/z [Da]	MH+ [Da]	Theo. MH+ [Da]	DeltaM [ppm]	Deltam/z [Da]	Activation Type	MS Order	Isolation Interference [%]	Ion Inject Time [ms]	RT [min]	First Scan	Spectrum File	File ID	XCorr	Percolator q-Value	Percolator PEP
		FALSE	High	Sequest HT (A2)	Unambiguous	TFAPEEISAMVLTK		1	1	P11021	P11021	0	2	0.6386	0	1	1	768.908	1536.81	1536.8	7.61	0.00584	HCD (High Energy Collision Dissociation)	MS2	38.9924	22.782	43.6594	48025	WQR_1_20190806.raw	F4	2.49	0	0.02064
	FALSE	High	KKELEEIVQPIISK		0.000299159	0	1	1	5	P11021	2	1653.98	High	0	0.0002816	4.99
		Checked	Confidence	Identifying Node	PSM Ambiguity	Annotated Sequence	Modifications	# Protein Groups	# Proteins	Master Protein Accessions	Protein Accessions	# Missed Cleavages	Charge	DeltaScore	DeltaCn	Rank	Search Engine Rank	m/z [Da]	MH+ [Da]	Theo. MH+ [Da]	DeltaM [ppm]	Deltam/z [Da]	Activation Type	MS Order	Isolation Interference [%]	Ion Inject Time [ms]	RT [min]	First Scan	Spectrum File	File ID	XCorr	Percolator q-Value	Percolator PEP
		FALSE	High	Sequest HT (A2)	Unambiguous	KKELEEIVQPIISK		1	1	P11021	P11021	2	2	0.7815	0	1	1	827.492	1653.98	1653.98	-1.17	-0.00097	HCD (High Energy Collision Dissociation)	MS2	0	37.724	25.4296	25954	WQR_1_20190806.raw	F4	4.76	0	0.0002261
		FALSE	High	Sequest HT (A2)	Unambiguous	KKELEEIVQPIISK		1	1	P11021	P11021	2	2	0.7956	0	1	1	827.492	1653.98	1653.98	-1.17	-0.00097	HCD (High Energy Collision Dissociation)	MS2	0	45	25.4344	25960	WQR_1_20190806.raw	F4	4.99	0	0.0002816
		FALSE	High	Sequest HT (A2)	Unambiguous	KKELEEIVQPIISK		1	1	P11021	P11021	2	2	0.7975	0	1	1	827.493	1653.98	1653.98	-0.14	-0.00011	HCD (High Energy Collision Dissociation)	MS2	0	45	25.4463	25973	WQR_1_20190806.raw	F4	4.84	0	0.001622
		FALSE	High	Sequest HT (A2)	Unambiguous	KKELEEIVQPIISK		1	1	P11021	P11021	2	3	0.7135	0	1	1	551.999	1653.98	1653.98	2.95	0.00163	HCD (High Energy Collision Dissociation)	MS2	63.8338	18.512	25.3331	25844	WQR_1_20190806.raw	F4	3.49	0.001475	0.1009
		FALSE	High	Sequest HT (A2)	Unambiguous	KKELEEIVQPIISK		1	1	P11021	P11021	2	3	0.6939	0	1	1	551.998	1653.98	1653.98	1.4	0.00077	HCD (High Energy Collision Dissociation)	MS2	28.1382	8.189	25.4865	26023	WQR_1_20190806.raw	F4	2.94	0.002731	0.1735
	FALSE	High	DNHLLGTFDLTGIPPAPR		0.00269896	0	1	1	8	P11021	0	1934.01	High	0	0.003942	4.32
		Checked	Confidence	Identifying Node	PSM Ambiguity	Annotated Sequence	Modifications	# Protein Groups	# Proteins	Master Protein Accessions	Protein Accessions	# Missed Cleavages	Charge	DeltaScore	DeltaCn	Rank	Search Engine Rank	m/z [Da]	MH+ [Da]	Theo. MH+ [Da]	DeltaM [ppm]	Deltam/z [Da]	Activation Type	MS Order	Isolation Interference [%]	Ion Inject Time [ms]	RT [min]	First Scan	Spectrum File	File ID	XCorr	Percolator q-Value	Percolator PEP
		FALSE	High	Sequest HT (A2)	Unambiguous	DNHLLGTFDLTGIPPAPR		1	1	P11021	P11021	0	3	0.6829	0	1	1	645.344	1934.02	1934.01	3.03	0.00195	HCD (High Energy Collision Dissociation)	MS2	59.5353	45	42.8628	47086	WQR_1_20190806.raw	F4	4.32	0	0.003942
		FALSE	High	Sequest HT (A2)	Unambiguous	DNHLLGTFDLTGIPPAPR		1	1	P11021	P11021	0	3	0.6519	0	1	1	645.344	1934.02	1934.01	3.03	0.00195	HCD (High Energy Collision Dissociation)	MS2	59.5353	45	42.8487	47068	WQR_1_20190806.raw	F4	4.28	0	0.002234
		FALSE	High	Sequest HT (A2)	Unambiguous	DNHLLGTFDLTGIPPAPR		1	1	P11021	P11021	0	3	0.7042	0	1	1	645.343	1934.01	1934.01	0.85	0.00055	HCD (High Energy Collision Dissociation)	MS2	24.3526	16.7	42.08	46171	WQR_1_20190806.raw	F4	3.55	0	0.01233
		FALSE	High	Sequest HT (A2)	Unambiguous	DNHLLGTFDLTGIPPAPR		1	1	P11021	P11021	0	3	0.6648	0	1	1	645.343	1934.01	1934.01	0.66	0.00043	HCD (High Energy Collision Dissociation)	MS2	0	17.636	42.0702	46160	WQR_1_20190806.raw	F4	3.61	0	0.01483
		FALSE	High	Sequest HT (A2)	Unambiguous	DNHLLGTFDLTGIPPAPR		1	1	P11021	P11021	0	3	0.6905	0	1	1	645.342	1934.01	1934.01	-0.57	-0.00037	HCD (High Energy Collision Dissociation)	MS2	46.529	15.103	41.5178	45524	WQR_1_20190806.raw	F4	4.2	0	0.01572
		FALSE	High	Sequest HT (A2)	Unambiguous	DNHLLGTFDLTGIPPAPR		1	1	P11021	P11021	0	3	0.7014	0	1	1	645.342	1934.01	1934.01	-0.76	-0.00049	HCD (High Energy Collision Dissociation)	MS2	7.33678	18.335	41.2434	45194	WQR_1_20190806.raw	F4	3.65	0	0.01032
		FALSE	High	Sequest HT (A2)	Unambiguous	DNHLLGTFDLTGIPPAPR		1	1	P11021	P11021	0	3	0.7215	0	1	1	645.343	1934.02	1934.01	1.14	0.00073	HCD (High Energy Collision Dissociation)	MS2	0	13.555	42.032	46115	WQR_1_20190806.raw	F4	3.77	0.0007925	0.03067
		FALSE	High	Sequest HT (A2)	Unambiguous	DNHLLGTFDLTGIPPAPR		1	1	P11021	P11021	0	3	0.6234	0	1	1	645.344	1934.02	1934.01	1.8	0.00116	HCD (High Energy Collision Dissociation)	MS2	45.1612	7.415	41.25	45201	WQR_1_20190806.raw	F4	3.08	0.002119	0.1373
	FALSE	High	VTHAVVTVPAYFNDAQR		0.00745197	0	1	1	3	P11021	0	1887.97	High	0	0.0168	3.93
		Checked	Confidence	Identifying Node	PSM Ambiguity	Annotated Sequence	Modifications	# Protein Groups	# Proteins	Master Protein Accessions	Protein Accessions	# Missed Cleavages	Charge	DeltaScore	DeltaCn	Rank	Search Engine Rank	m/z [Da]	MH+ [Da]	Theo. MH+ [Da]	DeltaM [ppm]	Deltam/z [Da]	Activation Type	MS Order	Isolation Interference [%]	Ion Inject Time [ms]	RT [min]	First Scan	Spectrum File	File ID	XCorr	Percolator q-Value	Percolator PEP
		FALSE	High	Sequest HT (A2)	Unambiguous	VTHAVVTVPAYFNDAQR		1	1	P11021	P11021	0	3	0.6768	0	1	1	629.994	1887.97	1887.97	-1.36	-0.00086	HCD (High Energy Collision Dissociation)	MS2	50.8981	4.437	27.5789	28622	WQR_1_20190806.raw	F4	3.93	0	0.0168
		FALSE	High	Sequest HT (A2)	Unambiguous	VTHAVVTVPAYFNDAQR		1	1	P11021	P11021	0	3	0.5953	0	1	1	629.994	1887.97	1887.97	-1.36	-0.00086	HCD (High Energy Collision Dissociation)	MS2	75.0803	1.944	27.5801	28624	WQR_1_20190806.raw	F4	2.99	0	0.01165
		FALSE	High	Sequest HT (A2)	Unambiguous	VTHAVVTVPAYFNDAQR		1	1	P11021	P11021	0	3	0.7318	0	1	1	629.996	1887.97	1887.97	0.97	0.00061	HCD (High Energy Collision Dissociation)	MS2	18.948	3.237	27.6207	28675	WQR_1_20190806.raw	F4	3.84	0	0.006436
	FALSE	High	FEELNMDLFR		0.0157405	0	1	1	2	P11021	0	1313.62	High	0.0007925	0.03319	3
		Checked	Confidence	Identifying Node	PSM Ambiguity	Annotated Sequence	Modifications	# Protein Groups	# Proteins	Master Protein Accessions	Protein Accessions	# Missed Cleavages	Charge	DeltaScore	DeltaCn	Rank	Search Engine Rank	m/z [Da]	MH+ [Da]	Theo. MH+ [Da]	DeltaM [ppm]	Deltam/z [Da]	Activation Type	MS Order	Isolation Interference [%]	Ion Inject Time [ms]	RT [min]	First Scan	Spectrum File	File ID	XCorr	Percolator q-Value	Percolator PEP
		FALSE	High	Sequest HT (A2)	Unambiguous	FEELNMDLFR		1	1	P11021	P11021	0	2	0.6071	0	1	1	657.314	1313.62	1313.62	1.47	0.00097	HCD (High Energy Collision Dissociation)	MS2	0	20.135	42.9594	47200	WQR_1_20190806.raw	F4	2.8	0	0.01406
		FALSE	High	Sequest HT (A2)	Unambiguous	FEELNMDLFR		1	1	P11021	P11021	0	2	0.5433	0	1	1	657.315	1313.62	1313.62	3.05	0.00201	HCD (High Energy Collision Dissociation)	MS2	0	32.578	42.9386	47173	WQR_1_20190806.raw	F4	3	0.0007925	0.03319
	FALSE	High	AKFEELNMDLFR		0.00199798	0	1	1	3	P11021	1	1512.75	High	0	0.001633	3.99
		Checked	Confidence	Identifying Node	PSM Ambiguity	Annotated Sequence	Modifications	# Protein Groups	# Proteins	Master Protein Accessions	Protein Accessions	# Missed Cleavages	Charge	DeltaScore	DeltaCn	Rank	Search Engine Rank	m/z [Da]	MH+ [Da]	Theo. MH+ [Da]	DeltaM [ppm]	Deltam/z [Da]	Activation Type	MS Order	Isolation Interference [%]	Ion Inject Time [ms]	RT [min]	First Scan	Spectrum File	File ID	XCorr	Percolator q-Value	Percolator PEP
		FALSE	High	Sequest HT (A2)	Unambiguous	AKFEELNMDLFR		1	1	P11021	P11021	1	2	0.6302	0	1	1	756.881	1512.76	1512.75	2.41	0.00182	HCD (High Energy Collision Dissociation)	MS2	44.2458	27.998	37.6336	40880	WQR_1_20190806.raw	F4	3.84	0	0.01505
		FALSE	High	Sequest HT (A2)	Unambiguous	AKFEELNMDLFR		1	1	P11021	P11021	1	2	0.7218	0	1	1	756.881	1512.75	1512.75	1.52	0.00115	HCD (High Energy Collision Dissociation)	MS2	7.69218	14.94	37.6565	40909	WQR_1_20190806.raw	F4	3.99	0	0.001633
		FALSE	High	Sequest HT (A2)	Unambiguous	AKFEELNMDLFR		1	1	P11021	P11021	1	2	0.7674	0	1	1	756.881	1512.75	1512.75	1.52	0.00115	HCD (High Energy Collision Dissociation)	MS2	0	16.312	37.6583	40912	WQR_1_20190806.raw	F4	3.74	0	0.006613
	FALSE	High	AKFEELNMDLFR	1xOxidation [M8]	0.0651833	0.00152962	1	1	1	P11021	1	1528.75	High	0.0007925	0.06145	2.78
		Checked	Confidence	Identifying Node	PSM Ambiguity	Annotated Sequence	Modifications	# Protein Groups	# Proteins	Master Protein Accessions	Protein Accessions	# Missed Cleavages	Charge	DeltaScore	DeltaCn	Rank	Search Engine Rank	m/z [Da]	MH+ [Da]	Theo. MH+ [Da]	DeltaM [ppm]	Deltam/z [Da]	Activation Type	MS Order	Isolation Interference [%]	Ion Inject Time [ms]	RT [min]	First Scan	Spectrum File	File ID	XCorr	Percolator q-Value	Percolator PEP
		FALSE	High	Sequest HT (A2)	Unambiguous	AKFEELNmDLFR	M8(Oxidation)	1	1	P11021	P11021	1	2	0.5252	0	1	1	764.88	1528.75	1528.75	3.64	0.00278	HCD (High Energy Collision Dissociation)	MS2	0	34.086	30.943	32723	WQR_1_20190806.raw	F4	2.78	0.0007925	0.06145
	FALSE	High	KVTHAVVTVPAYFNDAQR		0.0450452	0.00152962	1	1	1	P11021	1	2016.07	High	0.0007925	0.04179	4.65
		Checked	Confidence	Identifying Node	PSM Ambiguity	Annotated Sequence	Modifications	# Protein Groups	# Proteins	Master Protein Accessions	Protein Accessions	# Missed Cleavages	Charge	DeltaScore	DeltaCn	Rank	Search Engine Rank	m/z [Da]	MH+ [Da]	Theo. MH+ [Da]	DeltaM [ppm]	Deltam/z [Da]	Activation Type	MS Order	Isolation Interference [%]	Ion Inject Time [ms]	RT [min]	First Scan	Spectrum File	File ID	XCorr	Percolator q-Value	Percolator PEP
		FALSE	High	Sequest HT (A2)	Unambiguous	KVTHAVVTVPAYFNDAQR		1	1	P11021	P11021	1	3	0.6645	0	1	1	672.694	2016.07	2016.07	0.97	0.00065	HCD (High Energy Collision Dissociation)	MS2	45.3145	35.362	23.8483	24046	WQR_1_20190806.raw	F4	4.65	0.0007925	0.04179
	FALSE	High	VEIIANDQGNR		0.0543262	0.00152962	5	7	6	P17066; P11142; P11021; P0DMV9; P34931	0	1228.63	High	0.0007925	0.05308	3.02
		Checked	Confidence	Identifying Node	PSM Ambiguity	Annotated Sequence	Modifications	# Protein Groups	# Proteins	Master Protein Accessions	Protein Accessions	# Missed Cleavages	Charge	DeltaScore	DeltaCn	Rank	Search Engine Rank	m/z [Da]	MH+ [Da]	Theo. MH+ [Da]	DeltaM [ppm]	Deltam/z [Da]	Activation Type	MS Order	Isolation Interference [%]	Ion Inject Time [ms]	RT [min]	First Scan	Spectrum File	File ID	XCorr	Percolator q-Value	Percolator PEP
		FALSE	High	Sequest HT (A2)	Unambiguous	VEIIANDQGNR		4	5	P11142; P11021; P0DMV9; P34931	P54652; P11142; P11021; P0DMV9; P34931	0	2		0	1	2	614.818	1228.63	1228.63	-0.05	-3e-05	HCD (High Energy Collision Dissociation)	MS2	53.266	45	13.8411	12226	WQR_1_20190806.raw	F4	2.96	0.0007925	0.05085
		FALSE	High	Sequest HT (A2)	Unambiguous	VEIIANDQGNR		4	5	P11142; P11021; P0DMV9; P34931	P54652; P11142; P11021; P0DMV9; P34931	0	2	0	0	1	1	614.817	1228.63	1228.63	-0.55	-0.00034	HCD (High Energy Collision Dissociation)	MS2	14.9929	45	13.8462	12231	WQR_1_20190806.raw	F4	3.02	0.0007925	0.05308
		FALSE	High	Sequest HT (A2)	Unambiguous	VEILANDQGNR		2	2	P17066	P48741; P17066	0	2		0	1	2	614.817	1228.63	1228.63	-0.55	-0.00034	HCD (High Energy Collision Dissociation)	MS2	14.9929	45	13.8462	12231	WQR_1_20190806.raw	F4	3.02	0.0007925	0.05308
		FALSE	High	Sequest HT (A2)	Unambiguous	VEILANDQGNR		2	2	P17066	P48741; P17066	0	2	0	0	1	1	614.818	1228.63	1228.63	-0.05	-3e-05	HCD (High Energy Collision Dissociation)	MS2	53.266	45	13.8411	12226	WQR_1_20190806.raw	F4	2.96	0.0007925	0.05085
		FALSE	High	Sequest HT (A2)	Unambiguous	VEILANDQGNR		2	2	P17066	P48741; P17066	0	2	0	0	1	1	614.817	1228.63	1228.63	-0.75	-0.00046	HCD (High Energy Collision Dissociation)	MS2	0	45	13.879	12268	WQR_1_20190806.raw	F4	2.66	0.002119	0.121
		FALSE	High	Sequest HT (A2)	Unambiguous	VEIIANDQGNR		4	5	P11142; P11021; P0DMV9; P34931	P54652; P11142; P11021; P0DMV9; P34931	0	2		0	1	2	614.817	1228.63	1228.63	-0.75	-0.00046	HCD (High Energy Collision Dissociation)	MS2	0	45	13.879	12268	WQR_1_20190806.raw	F4	2.66	0.002119	0.121
	FALSE	High	ITPSYVAFTPEGER		0.0659955	0.00152962	1	1	4	P11021	0	1566.78	High	0.0007925	0.06211	3.04
		Checked	Confidence	Identifying Node	PSM Ambiguity	Annotated Sequence	Modifications	# Protein Groups	# Proteins	Master Protein Accessions	Protein Accessions	# Missed Cleavages	Charge	DeltaScore	DeltaCn	Rank	Search Engine Rank	m/z [Da]	MH+ [Da]	Theo. MH+ [Da]	DeltaM [ppm]	Deltam/z [Da]	Activation Type	MS Order	Isolation Interference [%]	Ion Inject Time [ms]	RT [min]	First Scan	Spectrum File	File ID	XCorr	Percolator q-Value	Percolator PEP
		FALSE	High	Sequest HT (A2)	Unambiguous	ITPSYVAFTPEGER		1	1	P11021	P11021	0	2	0.6579	0	1	1	783.896	1566.78	1566.78	3.18	0.00249	HCD (High Energy Collision Dissociation)	MS2	12.7813	34.682	28.7287	30047	WQR_1_20190806.raw	F4	3.04	0.0007925	0.06211
		FALSE	High	Sequest HT (A2)	Unambiguous	ITPSYVAFTPEGER		1	1	P11021	P11021	0	2	0.6447	0	1	1	783.896	1566.78	1566.78	3.18	0.00249	HCD (High Energy Collision Dissociation)	MS2	17.403	45	28.7341	30053	WQR_1_20190806.raw	F4	2.73	0.0007925	0.06696
		FALSE	High	Sequest HT (A2)	Unambiguous	ITPSYVAFTPEGER		1	1	P11021	P11021	0	2	0.5375	0	1	1	783.894	1566.78	1566.78	0.77	0.0006	HCD (High Energy Collision Dissociation)	MS2	15.7999	39.715	28.7997	30127	WQR_1_20190806.raw	F4	2.4	0.001475	0.1035
		FALSE	High	Sequest HT (A2)	Unambiguous	ITPSYVAFTPEGER		1	1	P11021	P11021	0	2	0.745	0	1	1	783.894	1566.78	1566.78	1	0.00079	HCD (High Energy Collision Dissociation)	MS2	13.1681	12.183	28.7744	30098	WQR_1_20190806.raw	F4	2.98	0.001475	0.1089
	FALSE	High	LSSEDKETMEK		0.0810567	0.00152962	1	1	1	P11021	1	1296.6	High	0.0007925	0.07692	2.43
		Checked	Confidence	Identifying Node	PSM Ambiguity	Annotated Sequence	Modifications	# Protein Groups	# Proteins	Master Protein Accessions	Protein Accessions	# Missed Cleavages	Charge	DeltaScore	DeltaCn	Rank	Search Engine Rank	m/z [Da]	MH+ [Da]	Theo. MH+ [Da]	DeltaM [ppm]	Deltam/z [Da]	Activation Type	MS Order	Isolation Interference [%]	Ion Inject Time [ms]	RT [min]	First Scan	Spectrum File	File ID	XCorr	Percolator q-Value	Percolator PEP
		FALSE	High	Sequest HT (A2)	Unambiguous	LSSEDKETMEK		1	1	P11021	P11021	1	3	0.5597	0	1	1	432.872	1296.6	1296.6	1.87	0.00081	HCD (High Energy Collision Dissociation)	MS2	86.1863	16.28	8.146	5540	WQR_1_20190806.raw	F4	2.43	0.0007925	0.07692
	FALSE	High	ITITNDQNR		0.0651833	0.00152962	1	1	1	P11021	0	1074.55	High	0.0007925	0.06137	1.83
		Checked	Confidence	Identifying Node	PSM Ambiguity	Annotated Sequence	Modifications	# Protein Groups	# Proteins	Master Protein Accessions	Protein Accessions	# Missed Cleavages	Charge	DeltaScore	DeltaCn	Rank	Search Engine Rank	m/z [Da]	MH+ [Da]	Theo. MH+ [Da]	DeltaM [ppm]	Deltam/z [Da]	Activation Type	MS Order	Isolation Interference [%]	Ion Inject Time [ms]	RT [min]	First Scan	Spectrum File	File ID	XCorr	Percolator q-Value	Percolator PEP
		FALSE	High	Sequest HT (A2)	Unambiguous	ITITNDQNR		1	1	P11021	P11021	0	2	0.4153	0	1	1	537.781	1074.55	1074.55	0.63	0.00034	HCD (High Energy Collision Dissociation)	MS2	61.662	16.145	10.9513	8824	WQR_1_20190806.raw	F4	1.83	0.0007925	0.06137
	FALSE	High	DAGTIAGLNVMR	1xOxidation [M11]	0.04231	0.00152962	1	1	1	P11021	0	1233.63	High	0.0007925	0.03917	2.49
		Checked	Confidence	Identifying Node	PSM Ambiguity	Annotated Sequence	Modifications	# Protein Groups	# Proteins	Master Protein Accessions	Protein Accessions	# Missed Cleavages	Charge	DeltaScore	DeltaCn	Rank	Search Engine Rank	m/z [Da]	MH+ [Da]	Theo. MH+ [Da]	DeltaM [ppm]	Deltam/z [Da]	Activation Type	MS Order	Isolation Interference [%]	Ion Inject Time [ms]	RT [min]	First Scan	Spectrum File	File ID	XCorr	Percolator q-Value	Percolator PEP
		FALSE	High	Sequest HT (A2)	Unambiguous	DAGTIAGLNVmR	M11(Oxidation)	1	1	P11021	P11021	0	2	0.6104	0	1	1	617.318	1233.63	1233.63	1.93	0.00119	HCD (High Energy Collision Dissociation)	MS2	41.2602	25.025	23.0334	23048	WQR_1_20190806.raw	F4	2.49	0.0007925	0.03917
	FALSE	High	DAGTIAGLNVMR		0.0465738	0.00152962	1	1	1	P11021	0	1217.63	High	0.0007925	0.04332	1.97
		Checked	Confidence	Identifying Node	PSM Ambiguity	Annotated Sequence	Modifications	# Protein Groups	# Proteins	Master Protein Accessions	Protein Accessions	# Missed Cleavages	Charge	DeltaScore	DeltaCn	Rank	Search Engine Rank	m/z [Da]	MH+ [Da]	Theo. MH+ [Da]	DeltaM [ppm]	Deltam/z [Da]	Activation Type	MS Order	Isolation Interference [%]	Ion Inject Time [ms]	RT [min]	First Scan	Spectrum File	File ID	XCorr	Percolator q-Value	Percolator PEP
		FALSE	High	Sequest HT (A2)	Unambiguous	DAGTIAGLNVMR		1	1	P11021	P11021	0	2	0.6142	0	1	1	609.319	1217.63	1217.63	0.79	0.00048	HCD (High Energy Collision Dissociation)	MS2	88.1225	3.721	30.4492	32094	WQR_1_20190806.raw	F4	1.97	0.0007925	0.04332
	FALSE	High	TKPYIQVDIGGGQTK		0.033745	0.00152962	1	1	3	P11021	0	1604.86	High	0.001475	0.08918	3.11
		Checked	Confidence	Identifying Node	PSM Ambiguity	Annotated Sequence	Modifications	# Protein Groups	# Proteins	Master Protein Accessions	Protein Accessions	# Missed Cleavages	Charge	DeltaScore	DeltaCn	Rank	Search Engine Rank	m/z [Da]	MH+ [Da]	Theo. MH+ [Da]	DeltaM [ppm]	Deltam/z [Da]	Activation Type	MS Order	Isolation Interference [%]	Ion Inject Time [ms]	RT [min]	First Scan	Spectrum File	File ID	XCorr	Percolator q-Value	Percolator PEP
		FALSE	High	Sequest HT (A2)	Unambiguous	TKPYIQVDIGGGQTK		1	1	P11021	P11021	0	3	0.5906	0	1	1	535.626	1604.86	1604.86	0.37	0.0002	HCD (High Energy Collision Dissociation)	MS2	11.0196	2.131	21.1026	20713	WQR_1_20190806.raw	F4	2.98	0.0007925	0.03104
		FALSE	High	Sequest HT (A2)	Unambiguous	TKPYIQVDIGGGQTK		1	1	P11021	P11021	0	3	0.5498	0	1	1	535.626	1604.86	1604.86	0.37	0.0002	HCD (High Energy Collision Dissociation)	MS2	33.2593	1.435	21.1032	20714	WQR_1_20190806.raw	F4	3.11	0.001475	0.08918
		FALSE	High	Sequest HT (A2)	Unambiguous	TKPYIQVDIGGGQTK		1	1	P11021	P11021	0	3	0.5403	0	1	1	535.626	1604.86	1604.86	0.37	0.0002	HCD (High Energy Collision Dissociation)	MS2	43.8489	1.153	21.1049	20717	WQR_1_20190806.raw	F4	2.48	0.00393	0.2227
	FALSE	High	VYEGERPLTK		0.128644	0.00267473	1	1	1	P11021	0	1191.64	High	0.002119	0.1241	2.31
		Checked	Confidence	Identifying Node	PSM Ambiguity	Annotated Sequence	Modifications	# Protein Groups	# Proteins	Master Protein Accessions	Protein Accessions	# Missed Cleavages	Charge	DeltaScore	DeltaCn	Rank	Search Engine Rank	m/z [Da]	MH+ [Da]	Theo. MH+ [Da]	DeltaM [ppm]	Deltam/z [Da]	Activation Type	MS Order	Isolation Interference [%]	Ion Inject Time [ms]	RT [min]	First Scan	Spectrum File	File ID	XCorr	Percolator q-Value	Percolator PEP
		FALSE	High	Sequest HT (A2)	Unambiguous	VYEGERPLTK		1	1	P11021	P11021	0	3	0.4026	0	1	1	397.884	1191.64	1191.64	1.15	0.00046	HCD (High Energy Collision Dissociation)	MS2	86.6591	45	10.487	8306	WQR_1_20190806.raw	F4	2.31	0.002119	0.1241
	FALSE	High	VLEDSDLKK		0.107771	0.00267473	1	1	1	P11021	1	1046.57	High	0.001475	0.1034	2.38
		Checked	Confidence	Identifying Node	PSM Ambiguity	Annotated Sequence	Modifications	# Protein Groups	# Proteins	Master Protein Accessions	Protein Accessions	# Missed Cleavages	Charge	DeltaScore	DeltaCn	Rank	Search Engine Rank	m/z [Da]	MH+ [Da]	Theo. MH+ [Da]	DeltaM [ppm]	Deltam/z [Da]	Activation Type	MS Order	Isolation Interference [%]	Ion Inject Time [ms]	RT [min]	First Scan	Spectrum File	File ID	XCorr	Percolator q-Value	Percolator PEP
		FALSE	High	Sequest HT (A2)	Unambiguous	VLEDSDLKK		1	1	P11021	P11021	1	2	0.3824	0	1	1	523.792	1046.58	1046.57	2.9	0.00152	HCD (High Energy Collision Dissociation)	MS2	7.02022	35.244	10.0128	7753	WQR_1_20190806.raw	F4	2.38	0.001475	0.1034
	FALSE	High	KTKPYIQVDIGGGQTK		0.114497	0.00267473	1	1	1	P11021	1	1732.96	High	0.001475	0.1099	3.12
		Checked	Confidence	Identifying Node	PSM Ambiguity	Annotated Sequence	Modifications	# Protein Groups	# Proteins	Master Protein Accessions	Protein Accessions	# Missed Cleavages	Charge	DeltaScore	DeltaCn	Rank	Search Engine Rank	m/z [Da]	MH+ [Da]	Theo. MH+ [Da]	DeltaM [ppm]	Deltam/z [Da]	Activation Type	MS Order	Isolation Interference [%]	Ion Inject Time [ms]	RT [min]	First Scan	Spectrum File	File ID	XCorr	Percolator q-Value	Percolator PEP
		FALSE	High	Sequest HT (A2)	Unambiguous	KTKPYIQVDIGGGQTK		1	1	P11021	P11021	1	3	0.5994	0	1	1	578.326	1732.96	1732.96	1.9	0.0011	HCD (High Energy Collision Dissociation)	MS2	48.6228	14.575	17.319	16215	WQR_1_20190806.raw	F4	3.12	0.001475	0.1099
	FALSE	High	ETAEAYLGKK		0.117297	0.00267473	1	1	1	P11021	1	1109.58	High	0.001475	0.1124	1.96
		Checked	Confidence	Identifying Node	PSM Ambiguity	Annotated Sequence	Modifications	# Protein Groups	# Proteins	Master Protein Accessions	Protein Accessions	# Missed Cleavages	Charge	DeltaScore	DeltaCn	Rank	Search Engine Rank	m/z [Da]	MH+ [Da]	Theo. MH+ [Da]	DeltaM [ppm]	Deltam/z [Da]	Activation Type	MS Order	Isolation Interference [%]	Ion Inject Time [ms]	RT [min]	First Scan	Spectrum File	File ID	XCorr	Percolator q-Value	Percolator PEP
		FALSE	High	Sequest HT (A2)	Unambiguous	ETAEAYLGKK		1	1	P11021	P11021	1	2	0.4082	0	1	1	555.298	1109.59	1109.58	4.25	0.00236	HCD (High Energy Collision Dissociation)	MS2	70.8448	22.441	12.381	10501	WQR_1_20190806.raw	F4	1.96	0.001475	0.1124
	FALSE	High	VLEDSDLK		0.234919	0.00596215	1	1	1	P11021	0	918.478	High	0.00393	0.2301	1.65
		Checked	Confidence	Identifying Node	PSM Ambiguity	Annotated Sequence	Modifications	# Protein Groups	# Proteins	Master Protein Accessions	Protein Accessions	# Missed Cleavages	Charge	DeltaScore	DeltaCn	Rank	Search Engine Rank	m/z [Da]	MH+ [Da]	Theo. MH+ [Da]	DeltaM [ppm]	Deltam/z [Da]	Activation Type	MS Order	Isolation Interference [%]	Ion Inject Time [ms]	RT [min]	First Scan	Spectrum File	File ID	XCorr	Percolator q-Value	Percolator PEP
		FALSE	High	Sequest HT (A2)	Unambiguous	VLEDSDLK		1	1	P11021	P11021	0	2	0.4667	0	1	1	459.743	918.479	918.478	0.71	0.00032	HCD (High Energy Collision Dissociation)	MS2	7.06021	22.898	13.4309	11736	WQR_1_20190806.raw	F4	1.65	0.00393	0.2301
	FALSE	High	MKETAEAYLGK		0.254159	0.00816598	1	1	1	P11021	1	1240.62	High	0.005146	0.2491	2.51
		Checked	Confidence	Identifying Node	PSM Ambiguity	Annotated Sequence	Modifications	# Protein Groups	# Proteins	Master Protein Accessions	Protein Accessions	# Missed Cleavages	Charge	DeltaScore	DeltaCn	Rank	Search Engine Rank	m/z [Da]	MH+ [Da]	Theo. MH+ [Da]	DeltaM [ppm]	Deltam/z [Da]	Activation Type	MS Order	Isolation Interference [%]	Ion Inject Time [ms]	RT [min]	First Scan	Spectrum File	File ID	XCorr	Percolator q-Value	Percolator PEP
		FALSE	High	Sequest HT (A2)	Unambiguous	MKETAEAYLGK		1	1	P11021	P11021	1	3	0.5857	0	1	1	414.214	1240.63	1240.62	2.15	0.00089	HCD (High Energy Collision Dissociation)	MS2	24.36	36.978	15.3115	13922	WQR_1_20190806.raw	F4	2.51	0.005146	0.2491
	FALSE	High	ETAEAYLGK		0.255106	0.00816598	1	1	1	P11021	0	981.489	High	0.005146	0.2501	2.3
		Checked	Confidence	Identifying Node	PSM Ambiguity	Annotated Sequence	Modifications	# Protein Groups	# Proteins	Master Protein Accessions	Protein Accessions	# Missed Cleavages	Charge	DeltaScore	DeltaCn	Rank	Search Engine Rank	m/z [Da]	MH+ [Da]	Theo. MH+ [Da]	DeltaM [ppm]	Deltam/z [Da]	Activation Type	MS Order	Isolation Interference [%]	Ion Inject Time [ms]	RT [min]	First Scan	Spectrum File	File ID	XCorr	Percolator q-Value	Percolator PEP
		FALSE	High	Sequest HT (A2)	Unambiguous	ETAEAYLGK		1	1	P11021	P11021	0	2	0.4522	0	1	1	491.248	981.489	981.489	0.69	0.00034	HCD (High Energy Collision Dissociation)	MS2	64.607	31.678	15.7427	14407	WQR_1_20190806.raw	F4	2.3	0.005146	0.2501
FALSE	High	Master Protein	Q8N3R9	MAGUK p55 subfamily member 5 OS=Homo sapiens OX=9606 GN=MPP5 PE=1 SV=3	0	82.739	63	27	61	27	1	675	77.2	6.14	239.97	27
	Checked	Confidence	Sequence	Modifications	Qvality PEP	Qvality q-value	# Protein Groups	# Proteins	# PSMs	Master Protein Accessions	# Missed Cleavages	Theo. MH+ [Da]	Confidence (by Search Engine): Sequest HT	Percolator q-Value (by Search Engine): Sequest HT	Percolator PEP (by Search Engine): Sequest HT	XCorr (by Search Engine): Sequest HT
	FALSE	High	VAEQEMQLEPITDER		0.000194135	0	1	1	2	Q8N3R9	0	1787.85	High	0	0.001138	4.84
		Checked	Confidence	Identifying Node	PSM Ambiguity	Annotated Sequence	Modifications	# Protein Groups	# Proteins	Master Protein Accessions	Protein Accessions	# Missed Cleavages	Charge	DeltaScore	DeltaCn	Rank	Search Engine Rank	m/z [Da]	MH+ [Da]	Theo. MH+ [Da]	DeltaM [ppm]	Deltam/z [Da]	Activation Type	MS Order	Isolation Interference [%]	Ion Inject Time [ms]	RT [min]	First Scan	Spectrum File	File ID	XCorr	Percolator q-Value	Percolator PEP
		FALSE	High	Sequest HT (A2)	Unambiguous	VAEQEMQLEPITDER		1	1	Q8N3R9	Q8N3R9	0	2	0.767	0	1	1	894.43	1787.85	1787.85	2.49	0.00223	HCD (High Energy Collision Dissociation)	MS2	0	2.803	27.1467	28057	WQR_1_20190806.raw	F4	4.55	0	0.0001445
		FALSE	High	Sequest HT (A2)	Unambiguous	VAEQEMQLEPITDER		1	1	Q8N3R9	Q8N3R9	0	2	0.7893	0	1	1	894.43	1787.85	1787.85	2.49	0.00223	HCD (High Energy Collision Dissociation)	MS2	0	5.947	27.1473	28058	WQR_1_20190806.raw	F4	4.84	0	0.001138
	FALSE	High	LDTEPQWVPSTWLR		0.00334952	0	1	1	3	Q8N3R9	0	1727.88	High	0	0.002808	3.03
		Checked	Confidence	Identifying Node	PSM Ambiguity	Annotated Sequence	Modifications	# Protein Groups	# Proteins	Master Protein Accessions	Protein Accessions	# Missed Cleavages	Charge	DeltaScore	DeltaCn	Rank	Search Engine Rank	m/z [Da]	MH+ [Da]	Theo. MH+ [Da]	DeltaM [ppm]	Deltam/z [Da]	Activation Type	MS Order	Isolation Interference [%]	Ion Inject Time [ms]	RT [min]	First Scan	Spectrum File	File ID	XCorr	Percolator q-Value	Percolator PEP
		FALSE	High	Sequest HT (A2)	Unambiguous	LDTEPQWVPSTWLR		1	1	Q8N3R9	Q8N3R9	0	2	0.6136	0	1	1	864.441	1727.87	1727.88	-0.27	-0.00023	HCD (High Energy Collision Dissociation)	MS2	0	45	45.1819	49797	WQR_1_20190806.raw	F4	2.95	0	0.006011
		FALSE	High	Sequest HT (A2)	Unambiguous	LDTEPQWVPSTWLR		1	1	Q8N3R9	Q8N3R9	0	2	0.6535	0	1	1	864.443	1727.88	1727.88	2.06	0.00178	HCD (High Energy Collision Dissociation)	MS2	0	24.145	45.1639	49777	WQR_1_20190806.raw	F4	3.03	0	0.002808
		FALSE	High	Sequest HT (A2)	Unambiguous	LDTEPQWVPSTWLR		1	1	Q8N3R9	Q8N3R9	0	2	0.675	0	1	1	864.442	1727.88	1727.88	1	0.00087	HCD (High Energy Collision Dissociation)	MS2	0	16.188	45.1553	49768	WQR_1_20190806.raw	F4	2.8	0.0007925	0.02509
	FALSE	High	KRPIILIGPQNCGQNELR	1xCarbamidomethyl [C12]	0.000499669	0	1	1	4	Q8N3R9	1	2106.16	High	0	0.0003865	7.15
		Checked	Confidence	Identifying Node	PSM Ambiguity	Annotated Sequence	Modifications	# Protein Groups	# Proteins	Master Protein Accessions	Protein Accessions	# Missed Cleavages	Charge	DeltaScore	DeltaCn	Rank	Search Engine Rank	m/z [Da]	MH+ [Da]	Theo. MH+ [Da]	DeltaM [ppm]	Deltam/z [Da]	Activation Type	MS Order	Isolation Interference [%]	Ion Inject Time [ms]	RT [min]	First Scan	Spectrum File	File ID	XCorr	Percolator q-Value	Percolator PEP
		FALSE	High	Sequest HT (A2)	Unambiguous	KRPIILIGPQNcGQNELR	C12(Carbamidomethyl)	1	1	Q8N3R9	Q8N3R9	1	4	0.7743	0	1	1	527.297	2106.16	2106.16	1.97	0.00104	HCD (High Energy Collision Dissociation)	MS2	21.1725	3.079	22.1808	21991	WQR_1_20190806.raw	F4	4.83	0	0.00475
		FALSE	High	Sequest HT (A2)	Unambiguous	KRPIILIGPQNcGQNELR	C12(Carbamidomethyl)	1	1	Q8N3R9	Q8N3R9	1	3	0.8551	0	1	1	702.726	2106.16	2106.16	1.72	0.00121	HCD (High Energy Collision Dissociation)	MS2	0	7.775	22.1814	21992	WQR_1_20190806.raw	F4	6.21	0	0.0005384
		FALSE	High	Sequest HT (A2)	Unambiguous	KRPIILIGPQNcGQNELR	C12(Carbamidomethyl)	1	1	Q8N3R9	Q8N3R9	1	3	0.8713	0	1	1	702.726	2106.16	2106.16	1.28	0.0009	HCD (High Energy Collision Dissociation)	MS2	0	8.169	22.1842	21994	WQR_1_20190806.raw	F4	7.15	0	0.0003865
		FALSE	High	Sequest HT (A2)	Unambiguous	KRPIILIGPQNcGQNELR	C12(Carbamidomethyl)	1	1	Q8N3R9	Q8N3R9	1	4	0.6088	0	1	1	527.298	2106.17	2106.16	4.99	0.00263	HCD (High Energy Collision Dissociation)	MS2		13.199	21.9922	21772	WQR_1_20190806.raw	F4	3.4	0.0007925	0.04907
	FALSE	High	LINKLDTEPQWVPSTWLR		0.000704391	0	1	1	2	Q8N3R9	1	2196.18	High	0	0.0005527	5.13
		Checked	Confidence	Identifying Node	PSM Ambiguity	Annotated Sequence	Modifications	# Protein Groups	# Proteins	Master Protein Accessions	Protein Accessions	# Missed Cleavages	Charge	DeltaScore	DeltaCn	Rank	Search Engine Rank	m/z [Da]	MH+ [Da]	Theo. MH+ [Da]	DeltaM [ppm]	Deltam/z [Da]	Activation Type	MS Order	Isolation Interference [%]	Ion Inject Time [ms]	RT [min]	First Scan	Spectrum File	File ID	XCorr	Percolator q-Value	Percolator PEP
		FALSE	High	Sequest HT (A2)	Unambiguous	LINKLDTEPQWVPSTWLR		1	1	Q8N3R9	Q8N3R9	1	3	0.7617	0	1	1	732.732	2196.18	2196.18	0.54	0.00039	HCD (High Energy Collision Dissociation)	MS2	10.0691	10.713	42.7596	46966	WQR_1_20190806.raw	F4	4.07	0	0.00453
		FALSE	High	Sequest HT (A2)	Unambiguous	LINKLDTEPQWVPSTWLR		1	1	Q8N3R9	Q8N3R9	1	3	0.8207	0	1	1	732.732	2196.18	2196.18	0.54	0.00039	HCD (High Energy Collision Dissociation)	MS2	4.9903	11.453	42.7584	46964	WQR_1_20190806.raw	F4	5.13	0	0.0005527
	FALSE	High	ILEIEDLFSSLK		0.00396753	0	1	1	2	Q8N3R9	0	1406.78	High	0	0.01235	2.93
		Checked	Confidence	Identifying Node	PSM Ambiguity	Annotated Sequence	Modifications	# Protein Groups	# Proteins	Master Protein Accessions	Protein Accessions	# Missed Cleavages	Charge	DeltaScore	DeltaCn	Rank	Search Engine Rank	m/z [Da]	MH+ [Da]	Theo. MH+ [Da]	DeltaM [ppm]	Deltam/z [Da]	Activation Type	MS Order	Isolation Interference [%]	Ion Inject Time [ms]	RT [min]	First Scan	Spectrum File	File ID	XCorr	Percolator q-Value	Percolator PEP
		FALSE	High	Sequest HT (A2)	Unambiguous	ILEIEDLFSSLK		1	1	Q8N3R9	Q8N3R9	0	2	0.6143	0	1	1	703.893	1406.78	1406.78	0.11	8e-05	HCD (High Energy Collision Dissociation)	MS2	57.1883	6.372	53.5606	59211	WQR_1_20190806.raw	F4	2.93	0	0.01235
		FALSE	High	Sequest HT (A2)	Unambiguous	ILEIEDLFSSLK		1	1	Q8N3R9	Q8N3R9	0	2	0.637	0	1	1	703.893	1406.78	1406.78	1.41	0.00099	HCD (High Energy Collision Dissociation)	MS2	47.8657	2.415	53.5839	59237	WQR_1_20190806.raw	F4	2.81	0	0.003341
	FALSE	High	IHNAITVHMNK		0.00431799	0	1	1	1	Q8N3R9	0	1277.68	High	0	0.003651	4.47
		Checked	Confidence	Identifying Node	PSM Ambiguity	Annotated Sequence	Modifications	# Protein Groups	# Proteins	Master Protein Accessions	Protein Accessions	# Missed Cleavages	Charge	DeltaScore	DeltaCn	Rank	Search Engine Rank	m/z [Da]	MH+ [Da]	Theo. MH+ [Da]	DeltaM [ppm]	Deltam/z [Da]	Activation Type	MS Order	Isolation Interference [%]	Ion Inject Time [ms]	RT [min]	First Scan	Spectrum File	File ID	XCorr	Percolator q-Value	Percolator PEP
		FALSE	High	Sequest HT (A2)	Unambiguous	IHNAITVHMNK		1	1	Q8N3R9	Q8N3R9	0	3	0.6711	0	1	1	426.564	1277.68	1277.68	-0.82	-0.00035	HCD (High Energy Collision Dissociation)	MS2	0	45	11.5772	9555	WQR_1_20190806.raw	F4	4.47	0	0.003651
	FALSE	High	RPIILIGPQNCGQNELR	1xCarbamidomethyl [C11]	0.000562646	0	1	1	1	Q8N3R9	0	1978.07	High	0	0.0004373	4.48
		Checked	Confidence	Identifying Node	PSM Ambiguity	Annotated Sequence	Modifications	# Protein Groups	# Proteins	Master Protein Accessions	Protein Accessions	# Missed Cleavages	Charge	DeltaScore	DeltaCn	Rank	Search Engine Rank	m/z [Da]	MH+ [Da]	Theo. MH+ [Da]	DeltaM [ppm]	Deltam/z [Da]	Activation Type	MS Order	Isolation Interference [%]	Ion Inject Time [ms]	RT [min]	First Scan	Spectrum File	File ID	XCorr	Percolator q-Value	Percolator PEP
		FALSE	High	Sequest HT (A2)	Unambiguous	RPIILIGPQNcGQNELR	C11(Carbamidomethyl)	1	1	Q8N3R9	Q8N3R9	0	3	0.7679	0	1	1	660.026	1978.06	1978.07	-0.09	-6e-05	HCD (High Energy Collision Dissociation)	MS2	21.1046	14.678	27.286	28236	WQR_1_20190806.raw	F4	4.48	0	0.0004373
	FALSE	High	SGLLHEGDEVLEINGIEIR		0.00513604	0	1	1	2	Q8N3R9	0	2093.09	High	0	0.004374	4.49
		Checked	Confidence	Identifying Node	PSM Ambiguity	Annotated Sequence	Modifications	# Protein Groups	# Proteins	Master Protein Accessions	Protein Accessions	# Missed Cleavages	Charge	DeltaScore	DeltaCn	Rank	Search Engine Rank	m/z [Da]	MH+ [Da]	Theo. MH+ [Da]	DeltaM [ppm]	Deltam/z [Da]	Activation Type	MS Order	Isolation Interference [%]	Ion Inject Time [ms]	RT [min]	First Scan	Spectrum File	File ID	XCorr	Percolator q-Value	Percolator PEP
		FALSE	High	Sequest HT (A2)	Unambiguous	SGLLHEGDEVLEINGIEIR		1	1	Q8N3R9	Q8N3R9	0	3	0.686	0	1	1	698.371	2093.1	2093.09	4.66	0.00325	HCD (High Energy Collision Dissociation)	MS2	14.5458	13.805	40.5742	44392	WQR_1_20190806.raw	F4	3.79	0	0.01326
		FALSE	High	Sequest HT (A2)	Unambiguous	SGLLHEGDEVLEINGIEIR		1	1	Q8N3R9	Q8N3R9	0	3	0.7194	0	1	1	698.368	2093.09	2093.09	1.42	0.00099	HCD (High Energy Collision Dissociation)	MS2	21.7087	5.523	40.4854	44277	WQR_1_20190806.raw	F4	4.49	0	0.004374
	FALSE	High	TGIDNPMFDTEEGIVLESPHYAVK		5.02078e-05	0	1	1	4	Q8N3R9	0	2662.27	High	0	0.009237	5.09
		Checked	Confidence	Identifying Node	PSM Ambiguity	Annotated Sequence	Modifications	# Protein Groups	# Proteins	Master Protein Accessions	Protein Accessions	# Missed Cleavages	Charge	DeltaScore	DeltaCn	Rank	Search Engine Rank	m/z [Da]	MH+ [Da]	Theo. MH+ [Da]	DeltaM [ppm]	Deltam/z [Da]	Activation Type	MS Order	Isolation Interference [%]	Ion Inject Time [ms]	RT [min]	First Scan	Spectrum File	File ID	XCorr	Percolator q-Value	Percolator PEP
		FALSE	High	Sequest HT (A2)	Unambiguous	TGIDNPMFDTEEGIVLESPHYAVK		1	1	Q8N3R9	Q8N3R9	0	3	0.6175	0	1	1	888.096	2662.27	2662.27	1.25	0.00111	HCD (High Energy Collision Dissociation)	MS2	4.21007	45	42.5758	46751	WQR_1_20190806.raw	F4	4.68	0	0.01444
		FALSE	High	Sequest HT (A2)	Unambiguous	TGIDNPMFDTEEGIVLESPHYAVK		1	1	Q8N3R9	Q8N3R9	0	3	0.7014	0	1	1	888.097	2662.28	2662.27	2.49	0.00221	HCD (High Energy Collision Dissociation)	MS2	44.3843	6.32	42.4095	46560	WQR_1_20190806.raw	F4	5.09	0	0.009237
		FALSE	High	Sequest HT (A2)	Unambiguous	TGIDNPMFDTEEGIVLESPHYAVK		1	1	Q8N3R9	Q8N3R9	0	3	0.7564	0	1	1	888.097	2662.28	2662.27	2.42	0.00215	HCD (High Energy Collision Dissociation)	MS2	40.6546	6.416	42.3935	46541	WQR_1_20190806.raw	F4	5.05	0	3.531e-05
		FALSE	High	Sequest HT (A2)	Unambiguous	TGIDNPMFDTEEGIVLESPHYAVK		1	1	Q8N3R9	Q8N3R9	0	3	0.6936	0	1	1	888.096	2662.27	2662.27	0.84	0.00074	HCD (High Energy Collision Dissociation)	MS2	76.6064	45	42.3438	46482	WQR_1_20190806.raw	F4	4.83	0	4.441e-05
	FALSE	High	TGIDNPMFDTEEGIVLESPHYAVK	1xOxidation [M7]	0.00578192	0	1	1	3	Q8N3R9	0	2678.27	High	0	0.004947	4.32
		Checked	Confidence	Identifying Node	PSM Ambiguity	Annotated Sequence	Modifications	# Protein Groups	# Proteins	Master Protein Accessions	Protein Accessions	# Missed Cleavages	Charge	DeltaScore	DeltaCn	Rank	Search Engine Rank	m/z [Da]	MH+ [Da]	Theo. MH+ [Da]	DeltaM [ppm]	Deltam/z [Da]	Activation Type	MS Order	Isolation Interference [%]	Ion Inject Time [ms]	RT [min]	First Scan	Spectrum File	File ID	XCorr	Percolator q-Value	Percolator PEP
		FALSE	High	Sequest HT (A2)	Unambiguous	TGIDNPmFDTEEGIVLESPHYAVK	M7(Oxidation)	1	1	Q8N3R9	Q8N3R9	0	3	0.6176	0	1	1	893.427	2678.27	2678.27	0.18	0.00016	HCD (High Energy Collision Dissociation)	MS2	31.0085	11.642	36.4257	39476	WQR_1_20190806.raw	F4	4.21	0	0.02007
		FALSE	High	Sequest HT (A2)	Unambiguous	TGIDNPmFDTEEGIVLESPHYAVK	M7(Oxidation)	1	1	Q8N3R9	Q8N3R9	0	3	0.6736	0	1	1	893.427	2678.27	2678.27	0.18	0.00016	HCD (High Energy Collision Dissociation)	MS2	38.9058	11.972	36.4269	39478	WQR_1_20190806.raw	F4	4.32	0	0.004947
		FALSE	High	Sequest HT (A2)	Unambiguous	TGIDNPmFDTEEGIVLESPHYAVK	M7(Oxidation)	1	1	Q8N3R9	Q8N3R9	0	3	0.4468	0	1	1	893.429	2678.27	2678.27	3.12	0.00278	HCD (High Energy Collision Dissociation)	MS2	64.2445	10.42	36.4089	39454	WQR_1_20190806.raw	F4	3.29	0.0007925	0.04897
	FALSE	High	NDDYDNEEILTYEEMSLYHQPANR		5.95204e-06	0	1	1	2	Q8N3R9	0	2959.27	High	0	0.0003157	5.5
		Checked	Confidence	Identifying Node	PSM Ambiguity	Annotated Sequence	Modifications	# Protein Groups	# Proteins	Master Protein Accessions	Protein Accessions	# Missed Cleavages	Charge	DeltaScore	DeltaCn	Rank	Search Engine Rank	m/z [Da]	MH+ [Da]	Theo. MH+ [Da]	DeltaM [ppm]	Deltam/z [Da]	Activation Type	MS Order	Isolation Interference [%]	Ion Inject Time [ms]	RT [min]	First Scan	Spectrum File	File ID	XCorr	Percolator q-Value	Percolator PEP
		FALSE	High	Sequest HT (A2)	Unambiguous	NDDYDNEEILTYEEMSLYHQPANR		1	1	Q8N3R9	Q8N3R9	0	3	0.7236	0	1	1	987.097	2959.28	2959.27	2.49	0.00245	HCD (High Energy Collision Dissociation)	MS2	42.9134	45	38.7903	42273	WQR_1_20190806.raw	F4	5.5	0	0.0003157
		FALSE	High	Sequest HT (A2)	Unambiguous	NDDYDNEEILTYEEMSLYHQPANR		1	1	Q8N3R9	Q8N3R9	0	3	0.7427	0	1	1	987.097	2959.28	2959.27	2.49	0.00245	HCD (High Energy Collision Dissociation)	MS2	19.2253	45	38.7863	42269	WQR_1_20190806.raw	F4	5.48	0	3.841e-06
	FALSE	High	NSDLKPYIIFIAPPSQER		0.0126378	0	1	1	2	Q8N3R9	0	2088.11	High	0	0.01116	3.46
		Checked	Confidence	Identifying Node	PSM Ambiguity	Annotated Sequence	Modifications	# Protein Groups	# Proteins	Master Protein Accessions	Protein Accessions	# Missed Cleavages	Charge	DeltaScore	DeltaCn	Rank	Search Engine Rank	m/z [Da]	MH+ [Da]	Theo. MH+ [Da]	DeltaM [ppm]	Deltam/z [Da]	Activation Type	MS Order	Isolation Interference [%]	Ion Inject Time [ms]	RT [min]	First Scan	Spectrum File	File ID	XCorr	Percolator q-Value	Percolator PEP
		FALSE	High	Sequest HT (A2)	Unambiguous	NSDLKPYIIFIAPPSQER		1	1	Q8N3R9	Q8N3R9	0	3	0.6532	0	1	1	696.714	2088.13	2088.11	6.83	0.00476	HCD (High Energy Collision Dissociation)	MS2	45.1742	2.433	39.4498	43051	WQR_1_20190806.raw	F4	3.46	0	0.01116
		FALSE	High	Sequest HT (A2)	Unambiguous	NSDLKPYIIFIAPPSQER		1	1	Q8N3R9	Q8N3R9	0	3	0.6208	0	1	1	696.711	2088.12	2088.11	2.36	0.00164	HCD (High Energy Collision Dissociation)	MS2	66.3537	2.84	39.425	43017	WQR_1_20190806.raw	F4	2.98	0.0007925	0.06556
	FALSE	High	NVDLASPEEHQK		0.00807525	0	1	1	3	Q8N3R9	0	1366.66	High	0	0.007013	2.67
		Checked	Confidence	Identifying Node	PSM Ambiguity	Annotated Sequence	Modifications	# Protein Groups	# Proteins	Master Protein Accessions	Protein Accessions	# Missed Cleavages	Charge	DeltaScore	DeltaCn	Rank	Search Engine Rank	m/z [Da]	MH+ [Da]	Theo. MH+ [Da]	DeltaM [ppm]	Deltam/z [Da]	Activation Type	MS Order	Isolation Interference [%]	Ion Inject Time [ms]	RT [min]	First Scan	Spectrum File	File ID	XCorr	Percolator q-Value	Percolator PEP
		FALSE	High	Sequest HT (A2)	Unambiguous	NVDLASPEEHQK		1	1	Q8N3R9	Q8N3R9	0	2	0.6779	0	1	1	683.835	1366.66	1366.66	2.49	0.0017	HCD (High Energy Collision Dissociation)	MS2	0	45	11.7259	9735	WQR_1_20190806.raw	F4	2.67	0	0.007013
		FALSE	High	Sequest HT (A2)	Unambiguous	NVDLASPEEHQK		1	1	Q8N3R9	Q8N3R9	0	3	0.4324	0	1	1	456.226	1366.66	1366.66	2.61	0.00119	HCD (High Energy Collision Dissociation)	MS2	74.5104	28.696	11.7716	9789	WQR_1_20190806.raw	F4	1.85	0.0007925	0.04314
		FALSE	High	Sequest HT (A2)	Unambiguous	NVDLASPEEHQK		1	1	Q8N3R9	Q8N3R9	0	3	0.3451	0	1	1	456.225	1366.66	1366.66	0	0	HCD (High Energy Collision Dissociation)	MS2	79.2099	14.417	11.7469	9759	WQR_1_20190806.raw	F4	1.42	0.0075	0.2739
	FALSE	High	EGQELTALLNTPHIQALLLAHDK		0.000599587	0	1	1	2	Q8N3R9	0	2525.37	High	0	0.005355	4.71
		Checked	Confidence	Identifying Node	PSM Ambiguity	Annotated Sequence	Modifications	# Protein Groups	# Proteins	Master Protein Accessions	Protein Accessions	# Missed Cleavages	Charge	DeltaScore	DeltaCn	Rank	Search Engine Rank	m/z [Da]	MH+ [Da]	Theo. MH+ [Da]	DeltaM [ppm]	Deltam/z [Da]	Activation Type	MS Order	Isolation Interference [%]	Ion Inject Time [ms]	RT [min]	First Scan	Spectrum File	File ID	XCorr	Percolator q-Value	Percolator PEP
		FALSE	High	Sequest HT (A2)	Unambiguous	EGQELTALLNTPHIQALLLAHDK		1	1	Q8N3R9	Q8N3R9	0	4	0.7159	0	1	1	632.1	2525.38	2525.37	1.74	0.0011	HCD (High Energy Collision Dissociation)	MS2	61.3915	13.631	45.9965	50736	WQR_1_20190806.raw	F4	3.52	0	0.0004675
		FALSE	High	Sequest HT (A2)	Unambiguous	EGQELTALLNTPHIQALLLAHDK		1	1	Q8N3R9	Q8N3R9	0	4	0.6985	0	1	1	632.099	2525.37	2525.37	0.77	0.00049	HCD (High Energy Collision Dissociation)	MS2	12.4534	44.275	45.8247	50537	WQR_1_20190806.raw	F4	4.71	0	0.005355
	FALSE	High	EGDEDNQPLAGLVPGK		0.00119653	0	1	1	3	Q8N3R9	0	1638.8	High	0	0.000961	4.59
		Checked	Confidence	Identifying Node	PSM Ambiguity	Annotated Sequence	Modifications	# Protein Groups	# Proteins	Master Protein Accessions	Protein Accessions	# Missed Cleavages	Charge	DeltaScore	DeltaCn	Rank	Search Engine Rank	m/z [Da]	MH+ [Da]	Theo. MH+ [Da]	DeltaM [ppm]	Deltam/z [Da]	Activation Type	MS Order	Isolation Interference [%]	Ion Inject Time [ms]	RT [min]	First Scan	Spectrum File	File ID	XCorr	Percolator q-Value	Percolator PEP
		FALSE	High	Sequest HT (A2)	Unambiguous	EGDEDNQPLAGLVPGK		1	1	Q8N3R9	Q8N3R9	0	2	0.6464	0	1	1	819.903	1638.8	1638.8	0.65	0.00053	HCD (High Energy Collision Dissociation)	MS2	0	45	30.2806	31893	WQR_1_20190806.raw	F4	2.8	0	0.0223
		FALSE	High	Sequest HT (A2)	Unambiguous	EGDEDNQPLAGLVPGK		1	1	Q8N3R9	Q8N3R9	0	2	0.756	0	1	1	819.904	1638.8	1638.8	2.66	0.00218	HCD (High Energy Collision Dissociation)	MS2	0	42.808	30.3124	31929	WQR_1_20190806.raw	F4	4.59	0	0.000961
		FALSE	High	Sequest HT (A2)	Unambiguous	EGDEDNQPLAGLVPGK		1	1	Q8N3R9	Q8N3R9	0	2	0.6826	0	1	1	819.904	1638.8	1638.8	1.99	0.00163	HCD (High Energy Collision Dissociation)	MS2	0	17.517	30.3931	32025	WQR_1_20190806.raw	F4	2.93	0.006395	0.2601
	FALSE	High	VYESIGQYGGETVK		0.00145407	0	1	1	2	Q8N3R9	0	1529.75	High	0	0.003001	3.85
		Checked	Confidence	Identifying Node	PSM Ambiguity	Annotated Sequence	Modifications	# Protein Groups	# Proteins	Master Protein Accessions	Protein Accessions	# Missed Cleavages	Charge	DeltaScore	DeltaCn	Rank	Search Engine Rank	m/z [Da]	MH+ [Da]	Theo. MH+ [Da]	DeltaM [ppm]	Deltam/z [Da]	Activation Type	MS Order	Isolation Interference [%]	Ion Inject Time [ms]	RT [min]	First Scan	Spectrum File	File ID	XCorr	Percolator q-Value	Percolator PEP
		FALSE	High	Sequest HT (A2)	Unambiguous	VYESIGQYGGETVK		1	1	Q8N3R9	Q8N3R9	0	2	0.6807	0	1	1	765.378	1529.75	1529.75	0.32	0.00025	HCD (High Energy Collision Dissociation)	MS2	0	4.125	21.5302	21219	WQR_1_20190806.raw	F4	3.57	0	0.001176
		FALSE	High	Sequest HT (A2)	Unambiguous	VYESIGQYGGETVK		1	1	Q8N3R9	Q8N3R9	0	2	0.6883	0	1	1	765.379	1529.75	1529.75	1.36	0.00104	HCD (High Energy Collision Dissociation)	MS2	0	35.318	21.518	21204	WQR_1_20190806.raw	F4	3.85	0	0.003001
	FALSE	High	EMEQNNGHYFDTAIVNSDLDK		0.00232712	0	1	1	1	Q8N3R9	0	2440.07	High	0	0.001915	4.69
		Checked	Confidence	Identifying Node	PSM Ambiguity	Annotated Sequence	Modifications	# Protein Groups	# Proteins	Master Protein Accessions	Protein Accessions	# Missed Cleavages	Charge	DeltaScore	DeltaCn	Rank	Search Engine Rank	m/z [Da]	MH+ [Da]	Theo. MH+ [Da]	DeltaM [ppm]	Deltam/z [Da]	Activation Type	MS Order	Isolation Interference [%]	Ion Inject Time [ms]	RT [min]	First Scan	Spectrum File	File ID	XCorr	Percolator q-Value	Percolator PEP
		FALSE	High	Sequest HT (A2)	Unambiguous	EMEQNNGHYFDTAIVNSDLDK		1	1	Q8N3R9	Q8N3R9	0	3	0.7143	0	1	1	814.028	2440.07	2440.07	-1.24	-0.00101	HCD (High Energy Collision Dissociation)	MS2	0	16.695	30.514	32175	WQR_1_20190806.raw	F4	4.69	0	0.001915
	FALSE	High	AHFDYDPSDDPYVPCR	1xCarbamidomethyl [C15]	0.00106715	0	1	1	3	Q8N3R9	0	1953.81	High	0	0.000852	4.91
		Checked	Confidence	Identifying Node	PSM Ambiguity	Annotated Sequence	Modifications	# Protein Groups	# Proteins	Master Protein Accessions	Protein Accessions	# Missed Cleavages	Charge	DeltaScore	DeltaCn	Rank	Search Engine Rank	m/z [Da]	MH+ [Da]	Theo. MH+ [Da]	DeltaM [ppm]	Deltam/z [Da]	Activation Type	MS Order	Isolation Interference [%]	Ion Inject Time [ms]	RT [min]	First Scan	Spectrum File	File ID	XCorr	Percolator q-Value	Percolator PEP
		FALSE	High	Sequest HT (A2)	Unambiguous	AHFDYDPSDDPYVPcR	C15(Carbamidomethyl)	1	1	Q8N3R9	Q8N3R9	0	3	0.656	0	1	1	651.942	1953.81	1953.81	2.39	0.00155	HCD (High Energy Collision Dissociation)	MS2	45.6705	15.235	26.0969	26764	WQR_1_20190806.raw	F4	2.82	0	0.003752
		FALSE	High	Sequest HT (A2)	Unambiguous	AHFDYDPSDDPYVPcR	C15(Carbamidomethyl)	1	1	Q8N3R9	Q8N3R9	0	3	0.6823	0	1	1	651.941	1953.81	1953.81	1.26	0.00082	HCD (High Energy Collision Dissociation)	MS2	4.63703	6.732	26.16	26838	WQR_1_20190806.raw	F4	4.91	0	0.000852
		FALSE	High	Sequest HT (A2)	Unambiguous	AHFDYDPSDDPYVPcR	C15(Carbamidomethyl)	1	1	Q8N3R9	Q8N3R9	0	3	0.6592	0	1	1	651.941	1953.81	1953.81	1.26	0.00082	HCD (High Energy Collision Dissociation)	MS2	4.18834	7.068	26.1614	26840	WQR_1_20190806.raw	F4	4.9	0	0.003091
	FALSE	High	ASPPFPLISNAQDLAQEVQTVLKPVHHK		0.00059705	0	1	1	4	Q8N3R9	0	3064.66	High	0	0.0005348	6.17
		Checked	Confidence	Identifying Node	PSM Ambiguity	Annotated Sequence	Modifications	# Protein Groups	# Proteins	Master Protein Accessions	Protein Accessions	# Missed Cleavages	Charge	DeltaScore	DeltaCn	Rank	Search Engine Rank	m/z [Da]	MH+ [Da]	Theo. MH+ [Da]	DeltaM [ppm]	Deltam/z [Da]	Activation Type	MS Order	Isolation Interference [%]	Ion Inject Time [ms]	RT [min]	First Scan	Spectrum File	File ID	XCorr	Percolator q-Value	Percolator PEP
		FALSE	High	Sequest HT (A2)	Unambiguous	ASPPFPLISNAQDLAQEVQTVLKPVHHK		1	1	Q8N3R9	Q8N3R9	0	4	0.7426	0	1	1	766.922	3064.67	3064.66	3.28	0.00251	HCD (High Energy Collision Dissociation)	MS2	0	30.176	52.6038	58161	WQR_1_20190806.raw	F4	5.75	0	0.0004642
		FALSE	High	Sequest HT (A2)	Unambiguous	ASPPFPLISNAQDLAQEVQTVLKPVHHK		1	1	Q8N3R9	Q8N3R9	0	4	0.7715	0	1	1	766.921	3064.66	3064.66	1.76	0.00135	HCD (High Energy Collision Dissociation)	MS2	15.7912	39.51	52.5945	58152	WQR_1_20190806.raw	F4	6.17	0	0.0005348
		FALSE	High	Sequest HT (A2)	Unambiguous	ASPPFPLISNAQDLAQEVQTVLKPVHHK		1	1	Q8N3R9	Q8N3R9	0	4	0.6891	0	1	1	766.921	3064.66	3064.66	1.76	0.00135	HCD (High Energy Collision Dissociation)	MS2	8.37912	38	52.5936	58151	WQR_1_20190806.raw	F4	5.34	0	0.002869
		FALSE	High	Sequest HT (A2)	Unambiguous	ASPPFPLISNAQDLAQEVQTVLKPVHHK		1	1	Q8N3R9	Q8N3R9	0	4	0.6601	0	1	1	766.916	3064.64	3064.66	-4.72	-0.00361	HCD (High Energy Collision Dissociation)	MS2		45	53.3873	59024	WQR_1_20190806.raw	F4	4.56	0.0007925	0.02756
	FALSE	High	GKDVNEVFDLLSDMHGTLTFVLIPSQQIKPPPAK		0.00533538	0	1	1	1	Q8N3R9	1	3734.98	High	0	0.004545	4.68
		Checked	Confidence	Identifying Node	PSM Ambiguity	Annotated Sequence	Modifications	# Protein Groups	# Proteins	Master Protein Accessions	Protein Accessions	# Missed Cleavages	Charge	DeltaScore	DeltaCn	Rank	Search Engine Rank	m/z [Da]	MH+ [Da]	Theo. MH+ [Da]	DeltaM [ppm]	Deltam/z [Da]	Activation Type	MS Order	Isolation Interference [%]	Ion Inject Time [ms]	RT [min]	First Scan	Spectrum File	File ID	XCorr	Percolator q-Value	Percolator PEP
		FALSE	High	Sequest HT (A2)	Unambiguous	GKDVNEVFDLLSDMHGTLTFVLIPSQQIKPPPAK		1	1	Q8N3R9	Q8N3R9	1	4	0.7628	0	1	1	934.503	3734.99	3734.98	1.69	0.00158	HCD (High Energy Collision Dissociation)	MS2	31.9491	45	54.4336	60136	WQR_1_20190806.raw	F4	4.68	0	0.004545
	FALSE	High	GDILHVISQEDPNWWQAYR		0.00246929	0	1	1	3	Q8N3R9	0	2327.12	High	0	0.002042	4.81
		Checked	Confidence	Identifying Node	PSM Ambiguity	Annotated Sequence	Modifications	# Protein Groups	# Proteins	Master Protein Accessions	Protein Accessions	# Missed Cleavages	Charge	DeltaScore	DeltaCn	Rank	Search Engine Rank	m/z [Da]	MH+ [Da]	Theo. MH+ [Da]	DeltaM [ppm]	Deltam/z [Da]	Activation Type	MS Order	Isolation Interference [%]	Ion Inject Time [ms]	RT [min]	First Scan	Spectrum File	File ID	XCorr	Percolator q-Value	Percolator PEP
		FALSE	High	Sequest HT (A2)	Unambiguous	GDILHVISQEDPNWWQAYR		1	1	Q8N3R9	Q8N3R9	0	3	0.6861	0	1	1	776.379	2327.12	2327.12	1.41	0.00109	HCD (High Energy Collision Dissociation)	MS2	16.4145	30.004	46.6721	51543	WQR_1_20190806.raw	F4	4.81	0	0.002042
		FALSE	High	Sequest HT (A2)	Unambiguous	GDILHVISQEDPNWWQAYR		1	1	Q8N3R9	Q8N3R9	0	3	0.6697	0	1	1	776.38	2327.12	2327.12	1.8	0.0014	HCD (High Energy Collision Dissociation)	MS2	25.6947	19.796	46.8669	51789	WQR_1_20190806.raw	F4	3.33	0	0.005568
		FALSE	High	Sequest HT (A2)	Unambiguous	GDILHVISQEDPNWWQAYR		1	1	Q8N3R9	Q8N3R9	0	3	0.659	0	1	1	776.38	2327.12	2327.12	1.8	0.0014	HCD (High Energy Collision Dissociation)	MS2	35.5602	19.423	46.8644	51786	WQR_1_20190806.raw	F4	3.05	0	0.01507
	FALSE	High	HIQHTLVDSQSQEDISLLLQLVQNK		3.17814e-06	0	1	1	1	Q8N3R9	0	2886.53	High	0	1.997e-06	8.02
		Checked	Confidence	Identifying Node	PSM Ambiguity	Annotated Sequence	Modifications	# Protein Groups	# Proteins	Master Protein Accessions	Protein Accessions	# Missed Cleavages	Charge	DeltaScore	DeltaCn	Rank	Search Engine Rank	m/z [Da]	MH+ [Da]	Theo. MH+ [Da]	DeltaM [ppm]	Deltam/z [Da]	Activation Type	MS Order	Isolation Interference [%]	Ion Inject Time [ms]	RT [min]	First Scan	Spectrum File	File ID	XCorr	Percolator q-Value	Percolator PEP
		FALSE	High	Sequest HT (A2)	Unambiguous	HIQHTLVDSQSQEDISLLLQLVQNK		1	1	Q8N3R9	Q8N3R9	0	3	0.8616	0	1	1	962.851	2886.54	2886.53	2.39	0.0023	HCD (High Energy Collision Dissociation)	MS2	12.5895	45	50.9173	56293	WQR_1_20190806.raw	F4	8.02	0	1.997e-06
	FALSE	High	QTIEEDKEPEK		0.0432032	0.00152962	1	1	1	Q8N3R9	1	1345.65	High	0.0007925	0.04003	3.43
		Checked	Confidence	Identifying Node	PSM Ambiguity	Annotated Sequence	Modifications	# Protein Groups	# Proteins	Master Protein Accessions	Protein Accessions	# Missed Cleavages	Charge	DeltaScore	DeltaCn	Rank	Search Engine Rank	m/z [Da]	MH+ [Da]	Theo. MH+ [Da]	DeltaM [ppm]	Deltam/z [Da]	Activation Type	MS Order	Isolation Interference [%]	Ion Inject Time [ms]	RT [min]	First Scan	Spectrum File	File ID	XCorr	Percolator q-Value	Percolator PEP
		FALSE	High	Sequest HT (A2)	Unambiguous	QTIEEDKEPEK		1	1	Q8N3R9	Q8N3R9	1	3	0.5364	0	1	1	449.221	1345.65	1345.65	0.91	0.00041	HCD (High Energy Collision Dissociation)	MS2	3.2494	11.192	8.2659	5683	WQR_1_20190806.raw	F4	3.43	0.0007925	0.04003
	FALSE	High	NEMDSVIISR		0.0346054	0.00152962	1	1	1	Q8N3R9	0	1163.57	High	0.0007925	0.03188	3.16
		Checked	Confidence	Identifying Node	PSM Ambiguity	Annotated Sequence	Modifications	# Protein Groups	# Proteins	Master Protein Accessions	Protein Accessions	# Missed Cleavages	Charge	DeltaScore	DeltaCn	Rank	Search Engine Rank	m/z [Da]	MH+ [Da]	Theo. MH+ [Da]	DeltaM [ppm]	Deltam/z [Da]	Activation Type	MS Order	Isolation Interference [%]	Ion Inject Time [ms]	RT [min]	First Scan	Spectrum File	File ID	XCorr	Percolator q-Value	Percolator PEP
		FALSE	High	Sequest HT (A2)	Unambiguous	NEMDSVIISR		1	1	Q8N3R9	Q8N3R9	0	2	0.5095	0	1	1	582.291	1163.57	1163.57	1.52	0.00088	HCD (High Energy Collision Dissociation)	MS2	9.58063	1.869	23.0844	23109	WQR_1_20190806.raw	F4	3.16	0.0007925	0.03188
	FALSE	High	NEMDSVIISR	1xOxidation [M3]	0.0452335	0.00152962	1	1	1	Q8N3R9	0	1179.57	High	0.0007925	0.0421	2.71
		Checked	Confidence	Identifying Node	PSM Ambiguity	Annotated Sequence	Modifications	# Protein Groups	# Proteins	Master Protein Accessions	Protein Accessions	# Missed Cleavages	Charge	DeltaScore	DeltaCn	Rank	Search Engine Rank	m/z [Da]	MH+ [Da]	Theo. MH+ [Da]	DeltaM [ppm]	Deltam/z [Da]	Activation Type	MS Order	Isolation Interference [%]	Ion Inject Time [ms]	RT [min]	First Scan	Spectrum File	File ID	XCorr	Percolator q-Value	Percolator PEP
		FALSE	High	Sequest HT (A2)	Unambiguous	NEmDSVIISR	M3(Oxidation)	1	1	Q8N3R9	Q8N3R9	0	2	0.5904	0	1	1	590.288	1179.57	1179.57	1.15	0.00068	HCD (High Energy Collision Dissociation)	MS2	12.6946	31.727	15.927	14618	WQR_1_20190806.raw	F4	2.71	0.0007925	0.0421
	FALSE	High	IHNAITVHMNK	1xOxidation [M9]	0.0762219	0.00152962	1	1	1	Q8N3R9	0	1293.67	High	0.0007925	0.07229	2.42
		Checked	Confidence	Identifying Node	PSM Ambiguity	Annotated Sequence	Modifications	# Protein Groups	# Proteins	Master Protein Accessions	Protein Accessions	# Missed Cleavages	Charge	DeltaScore	DeltaCn	Rank	Search Engine Rank	m/z [Da]	MH+ [Da]	Theo. MH+ [Da]	DeltaM [ppm]	Deltam/z [Da]	Activation Type	MS Order	Isolation Interference [%]	Ion Inject Time [ms]	RT [min]	First Scan	Spectrum File	File ID	XCorr	Percolator q-Value	Percolator PEP
		FALSE	High	Sequest HT (A2)	Unambiguous	IHNAITVHmNK	M9(Oxidation)	1	1	Q8N3R9	Q8N3R9	0	3	0.5702	0	1	1	431.896	1293.67	1293.67	-0.47	-0.0002	HCD (High Energy Collision Dissociation)	MS2	54.8708	28.601	8.111	5498	WQR_1_20190806.raw	F4	2.42	0.0007925	0.07229
	FALSE	High	QAFEADIAAGK		0.0448576	0.00152962	1	1	2	Q8N3R9	0	1120.56	High	0.0007925	0.04158	3.02
		Checked	Confidence	Identifying Node	PSM Ambiguity	Annotated Sequence	Modifications	# Protein Groups	# Proteins	Master Protein Accessions	Protein Accessions	# Missed Cleavages	Charge	DeltaScore	DeltaCn	Rank	Search Engine Rank	m/z [Da]	MH+ [Da]	Theo. MH+ [Da]	DeltaM [ppm]	Deltam/z [Da]	Activation Type	MS Order	Isolation Interference [%]	Ion Inject Time [ms]	RT [min]	First Scan	Spectrum File	File ID	XCorr	Percolator q-Value	Percolator PEP
		FALSE	High	Sequest HT (A2)	Unambiguous	QAFEADIAAGK		1	1	Q8N3R9	Q8N3R9	0	2	0.6921	0	1	1	560.785	1120.56	1120.56	0.08	4e-05	HCD (High Energy Collision Dissociation)	MS2	0	9.445	19.7366	19056	WQR_1_20190806.raw	F4	3.02	0.0007925	0.04158
		FALSE	High	Sequest HT (A2)	Unambiguous	QAFEADIAAGK		1	1	Q8N3R9	Q8N3R9	0	2	0.6606	0	1	1	560.785	1120.56	1120.56	-0.03	-2e-05	HCD (High Energy Collision Dissociation)	MS2	0	31.85	19.722	19041	WQR_1_20190806.raw	F4	2.74	0.0007925	0.04955
	FALSE	High	FIEHGEFEK		0.0379488	0.00152962	1	1	1	Q8N3R9	0	1135.54	High	0.0007925	0.035	2.06
		Checked	Confidence	Identifying Node	PSM Ambiguity	Annotated Sequence	Modifications	# Protein Groups	# Proteins	Master Protein Accessions	Protein Accessions	# Missed Cleavages	Charge	DeltaScore	DeltaCn	Rank	Search Engine Rank	m/z [Da]	MH+ [Da]	Theo. MH+ [Da]	DeltaM [ppm]	Deltam/z [Da]	Activation Type	MS Order	Isolation Interference [%]	Ion Inject Time [ms]	RT [min]	First Scan	Spectrum File	File ID	XCorr	Percolator q-Value	Percolator PEP
		FALSE	High	Sequest HT (A2)	Unambiguous	FIEHGEFEK		1	1	Q8N3R9	Q8N3R9	0	2	0.3592	0	1	1	568.276	1135.54	1135.54	2.53	0.00144	HCD (High Energy Collision Dissociation)	MS2	10.792	34.458	13.9802	12383	WQR_1_20190806.raw	F4	2.06	0.0007925	0.035
	FALSE	High	NPKPEELREIIEK		0.122109	0.00267473	1	1	2	Q8N3R9	1	1594.88	High	0.002119	0.1173	2.96
		Checked	Confidence	Identifying Node	PSM Ambiguity	Annotated Sequence	Modifications	# Protein Groups	# Proteins	Master Protein Accessions	Protein Accessions	# Missed Cleavages	Charge	DeltaScore	DeltaCn	Rank	Search Engine Rank	m/z [Da]	MH+ [Da]	Theo. MH+ [Da]	DeltaM [ppm]	Deltam/z [Da]	Activation Type	MS Order	Isolation Interference [%]	Ion Inject Time [ms]	RT [min]	First Scan	Spectrum File	File ID	XCorr	Percolator q-Value	Percolator PEP
		FALSE	High	Sequest HT (A2)	Unambiguous	NPKPEELREIIEK		1	1	Q8N3R9	Q8N3R9	1	3	0.598	0	1	1	532.3	1594.88	1594.88	2.65	0.00141	HCD (High Energy Collision Dissociation)	MS2	12.2605	14.574	21.6186	21323	WQR_1_20190806.raw	F4	2.96	0.002119	0.1173
		FALSE	High	Sequest HT (A2)	Unambiguous	NPKPEELREIIEK		1	1	Q8N3R9	Q8N3R9	1	3	0.6125	0	1	1	532.3	1594.88	1594.88	2.65	0.00141	HCD (High Energy Collision Dissociation)	MS2	12.2605	15.639	21.6199	21325	WQR_1_20190806.raw	F4	2.71	0.002731	0.1647
	FALSE	High	ICLLSLR	1xCarbamidomethyl [C2]	0.175282	0.00381703	1	1	1	Q8N3R9	0	874.518	High	0.002731	0.1705	2.27
		Checked	Confidence	Identifying Node	PSM Ambiguity	Annotated Sequence	Modifications	# Protein Groups	# Proteins	Master Protein Accessions	Protein Accessions	# Missed Cleavages	Charge	DeltaScore	DeltaCn	Rank	Search Engine Rank	m/z [Da]	MH+ [Da]	Theo. MH+ [Da]	DeltaM [ppm]	Deltam/z [Da]	Activation Type	MS Order	Isolation Interference [%]	Ion Inject Time [ms]	RT [min]	First Scan	Spectrum File	File ID	XCorr	Percolator q-Value	Percolator PEP
		FALSE	High	Sequest HT (A2)	Unambiguous	IcLLSLR	C2(Carbamidomethyl)	1	1	Q8N3R9	Q8N3R9	0	2	0.2643	0	1	1	437.762	874.518	874.518	-0.23	-0.0001	HCD (High Energy Collision Dissociation)	MS2	26.2569	45	32.1252	34199	WQR_1_20190806.raw	F4	2.27	0.002731	0.1705
FALSE	High	Master Protein	P35527	Keratin, type I cytoskeletal 9 OS=Homo sapiens OX=9606 GN=KRT9 PE=1 SV=3	0	75.336	48	24	56	24	1	623	62	5.24	253.98	24
	Checked	Confidence	Sequence	Modifications	Qvality PEP	Qvality q-value	# Protein Groups	# Proteins	# PSMs	Master Protein Accessions	# Missed Cleavages	Theo. MH+ [Da]	Confidence (by Search Engine): Sequest HT	Percolator q-Value (by Search Engine): Sequest HT	Percolator PEP (by Search Engine): Sequest HT	XCorr (by Search Engine): Sequest HT
	FALSE	High	LASYLDKVQALEEANNDLENK		0.000103221	0	1	1	3	P35527	1	2377.19	High	0	0.0001667	6.41
		Checked	Confidence	Identifying Node	PSM Ambiguity	Annotated Sequence	Modifications	# Protein Groups	# Proteins	Master Protein Accessions	Protein Accessions	# Missed Cleavages	Charge	DeltaScore	DeltaCn	Rank	Search Engine Rank	m/z [Da]	MH+ [Da]	Theo. MH+ [Da]	DeltaM [ppm]	Deltam/z [Da]	Activation Type	MS Order	Isolation Interference [%]	Ion Inject Time [ms]	RT [min]	First Scan	Spectrum File	File ID	XCorr	Percolator q-Value	Percolator PEP
		FALSE	High	Sequest HT (A2)	Unambiguous	LASYLDKVQALEEANNDLENK		1	1	P35527	P35527	1	3	0.78	0	1	1	793.068	2377.19	2377.19	0.3	0.00024	HCD (High Energy Collision Dissociation)	MS2	4.41773	11.405	36.2309	39230	WQR_1_20190806.raw	F4	6.41	0	0.0001667
		FALSE	High	Sequest HT (A2)	Unambiguous	LASYLDKVQALEEANNDLENK		1	1	P35527	P35527	1	3	0.8088	0	1	1	793.068	2377.19	2377.19	0.3	0.00024	HCD (High Energy Collision Dissociation)	MS2	0	9.243	36.2434	39244	WQR_1_20190806.raw	F4	6.17	0	7.496e-05
		FALSE	High	Sequest HT (A2)	Unambiguous	LASYLDKVQALEEANNDLENK		1	1	P35527	P35527	1	3	0.806	0	1	1	793.068	2377.19	2377.19	0.3	0.00024	HCD (High Energy Collision Dissociation)	MS2	4.41773	9.532	36.244	39245	WQR_1_20190806.raw	F4	6.34	0	0.0009539
	FALSE	High	TLNDMRQEYEQLIAK		0.0201901	0	1	1	3	P35527	1	1851.93	High	0	0.01816	2.78
		Checked	Confidence	Identifying Node	PSM Ambiguity	Annotated Sequence	Modifications	# Protein Groups	# Proteins	Master Protein Accessions	Protein Accessions	# Missed Cleavages	Charge	DeltaScore	DeltaCn	Rank	Search Engine Rank	m/z [Da]	MH+ [Da]	Theo. MH+ [Da]	DeltaM [ppm]	Deltam/z [Da]	Activation Type	MS Order	Isolation Interference [%]	Ion Inject Time [ms]	RT [min]	First Scan	Spectrum File	File ID	XCorr	Percolator q-Value	Percolator PEP
		FALSE	High	Sequest HT (A2)	Unambiguous	TLNDMRQEYEQLIAK		1	1	P35527	P35527	1	3	0.3813	0	1	1	617.983	1851.93	1851.93	3.32	0.00205	HCD (High Energy Collision Dissociation)	MS2	42.3524	45	35.6679	38572	WQR_1_20190806.raw	F4	2.78	0	0.01816
		FALSE	High	Sequest HT (A2)	Unambiguous	TLNDMRQEYEQLIAK		1	1	P35527	P35527	1	3	0.4065	0	1	1	617.982	1851.93	1851.93	3.13	0.00193	HCD (High Energy Collision Dissociation)	MS2	11.0855	18.287	35.6759	38580	WQR_1_20190806.raw	F4	2.78	0.0007925	0.07774
		FALSE	High	Sequest HT (A2)	Unambiguous	TLNDMRQEYEQLIAK		1	1	P35527	P35527	1	3	0.3441	0	1	1	617.981	1851.93	1851.93	1.54	0.00095	HCD (High Energy Collision Dissociation)	MS2	0	8.975	35.7372	38654	WQR_1_20190806.raw	F4	2.47	0.001475	0.1097
	FALSE	High	SDLEMQYETLQEELMALKK	2xOxidation [M5; M15]	0.00618677	0	1	1	1	P35527	1	2331.11	High	0	0.005322	4.86
		Checked	Confidence	Identifying Node	PSM Ambiguity	Annotated Sequence	Modifications	# Protein Groups	# Proteins	Master Protein Accessions	Protein Accessions	# Missed Cleavages	Charge	DeltaScore	DeltaCn	Rank	Search Engine Rank	m/z [Da]	MH+ [Da]	Theo. MH+ [Da]	DeltaM [ppm]	Deltam/z [Da]	Activation Type	MS Order	Isolation Interference [%]	Ion Inject Time [ms]	RT [min]	First Scan	Spectrum File	File ID	XCorr	Percolator q-Value	Percolator PEP
		FALSE	High	Sequest HT (A2)	Unambiguous	SDLEmQYETLQEELmALKK	M5(Oxidation); M15(Oxidation)	1	1	P35527	P35527	1	3	0.677	0	1	1	777.709	2331.11	2331.11	0.88	0.00068	HCD (High Energy Collision Dissociation)	MS2	0	26.003	45.6174	50301	WQR_1_20190806.raw	F4	4.86	0	0.005322
	FALSE	High	SDLEMQYETLQEELMALKK		0.000219532	0	1	1	3	P35527	1	2299.12	High	0	0.0001643	5.83
		Checked	Confidence	Identifying Node	PSM Ambiguity	Annotated Sequence	Modifications	# Protein Groups	# Proteins	Master Protein Accessions	Protein Accessions	# Missed Cleavages	Charge	DeltaScore	DeltaCn	Rank	Search Engine Rank	m/z [Da]	MH+ [Da]	Theo. MH+ [Da]	DeltaM [ppm]	Deltam/z [Da]	Activation Type	MS Order	Isolation Interference [%]	Ion Inject Time [ms]	RT [min]	First Scan	Spectrum File	File ID	XCorr	Percolator q-Value	Percolator PEP
		FALSE	High	Sequest HT (A2)	Unambiguous	SDLEMQYETLQEELMALKK		1	1	P35527	P35527	1	3	0.7804	0	1	1	767.047	2299.13	2299.12	2.49	0.00191	HCD (High Energy Collision Dissociation)	MS2	9.31033	20.515	47.6131	52612	WQR_1_20190806.raw	F4	5.83	0	0.0001643
		FALSE	High	Sequest HT (A2)	Unambiguous	SDLEMQYETLQEELMALKK		1	1	P35527	P35527	1	3	0.7412	0	1	1	767.047	2299.13	2299.12	2.49	0.00191	HCD (High Energy Collision Dissociation)	MS2	23.8713	15.071	47.5743	52570	WQR_1_20190806.raw	F4	4.83	0	0.0003797
		FALSE	High	Sequest HT (A2)	Unambiguous	SDLEMQYETLQEELMALKK		1	1	P35527	P35527	1	3	0.6936	0	1	1	767.046	2299.12	2299.12	2.25	0.00173	HCD (High Energy Collision Dissociation)	MS2	25.2448	29.468	47.5407	52533	WQR_1_20190806.raw	F4	4.7	0	0.0005225
	FALSE	High	SDLEMQYETLQEELMALK	2xOxidation [M5; M15]	0.00454294	0	1	1	2	P35527	0	2203.01	High	0	0.01068	3.89
		Checked	Confidence	Identifying Node	PSM Ambiguity	Annotated Sequence	Modifications	# Protein Groups	# Proteins	Master Protein Accessions	Protein Accessions	# Missed Cleavages	Charge	DeltaScore	DeltaCn	Rank	Search Engine Rank	m/z [Da]	MH+ [Da]	Theo. MH+ [Da]	DeltaM [ppm]	Deltam/z [Da]	Activation Type	MS Order	Isolation Interference [%]	Ion Inject Time [ms]	RT [min]	First Scan	Spectrum File	File ID	XCorr	Percolator q-Value	Percolator PEP
		FALSE	High	Sequest HT (A2)	Unambiguous	SDLEmQYETLQEELmALK	M5(Oxidation); M15(Oxidation)	1	1	P35527	P35527	0	2	0.6863	0	1	1	1102.01	2203.02	2203.01	1.54	0.0017	HCD (High Energy Collision Dissociation)	MS2	24.1812	45	51.3207	56735	WQR_1_20190806.raw	F4	3.73	0	0.003844
		FALSE	High	Sequest HT (A2)	Unambiguous	SDLEmQYETLQEELmALK	M5(Oxidation); M15(Oxidation)	1	1	P35527	P35527	0	2	0.6401	0	1	1	1102.01	2203.01	2203.01	-1.9	-0.00209	HCD (High Energy Collision Dissociation)	MS2	0	45	51.1293	56520	WQR_1_20190806.raw	F4	3.89	0	0.01068
	FALSE	High	SGGGGGGGLGSGGSIR		0.00104035	0	1	1	1	P35527	0	1232.6	High	0	0.0008283	4.5
		Checked	Confidence	Identifying Node	PSM Ambiguity	Annotated Sequence	Modifications	# Protein Groups	# Proteins	Master Protein Accessions	Protein Accessions	# Missed Cleavages	Charge	DeltaScore	DeltaCn	Rank	Search Engine Rank	m/z [Da]	MH+ [Da]	Theo. MH+ [Da]	DeltaM [ppm]	Deltam/z [Da]	Activation Type	MS Order	Isolation Interference [%]	Ion Inject Time [ms]	RT [min]	First Scan	Spectrum File	File ID	XCorr	Percolator q-Value	Percolator PEP
		FALSE	High	Sequest HT (A2)	Unambiguous	SGGGGGGGLGSGGSIR		1	1	P35527	P35527	0	2	0.7622	0	1	1	616.804	1232.6	1232.6	2.99	0.00184	HCD (High Energy Collision Dissociation)	MS2	8.09866	20.39	11.3058	9236	WQR_1_20190806.raw	F4	4.5	0	0.0008283
	FALSE	High	NYSPYYNTIDDLKDQIVDLTVGNNK		4.77175e-05	0	1	1	5	P35527	1	2902.41	High	0	0.0001478	6.64
		Checked	Confidence	Identifying Node	PSM Ambiguity	Annotated Sequence	Modifications	# Protein Groups	# Proteins	Master Protein Accessions	Protein Accessions	# Missed Cleavages	Charge	DeltaScore	DeltaCn	Rank	Search Engine Rank	m/z [Da]	MH+ [Da]	Theo. MH+ [Da]	DeltaM [ppm]	Deltam/z [Da]	Activation Type	MS Order	Isolation Interference [%]	Ion Inject Time [ms]	RT [min]	First Scan	Spectrum File	File ID	XCorr	Percolator q-Value	Percolator PEP
		FALSE	High	Sequest HT (A2)	Unambiguous	NYSPYYNTIDDLKDQIVDLTVGNNK		1	1	P35527	P35527	1	3	0.6062	0	1	1	968.14	2902.41	2902.41	-1.48	-0.00143	HCD (High Energy Collision Dissociation)	MS2	9.30157	26.758	52.4551	58001	WQR_1_20190806.raw	F4	5.46	0	0.0002577
		FALSE	High	Sequest HT (A2)	Unambiguous	NYSPYYNTIDDLKDQIVDLTVGNNK		1	1	P35527	P35527	1	3	0.6425	0	1	1	968.143	2902.42	2902.41	1.62	0.00156	HCD (High Energy Collision Dissociation)	MS2	9.9324	45	52.443	57988	WQR_1_20190806.raw	F4	5.51	0	3.354e-05
		FALSE	High	Sequest HT (A2)	Unambiguous	NYSPYYNTIDDLKDQIVDLTVGNNK		1	1	P35527	P35527	1	3	0.5901	0	1	1	968.143	2902.42	2902.41	1.62	0.00156	HCD (High Energy Collision Dissociation)	MS2	24.7051	45	52.4353	57979	WQR_1_20190806.raw	F4	5.27	0	9.832e-05
		FALSE	High	Sequest HT (A2)	Unambiguous	NYSPYYNTIDDLKDQIVDLTVGNNK		1	1	P35527	P35527	1	3	0.6807	0	1	1	968.143	2902.42	2902.41	1.62	0.00156	HCD (High Energy Collision Dissociation)	MS2	8.58917	38.413	52.433	57976	WQR_1_20190806.raw	F4	6.64	0	0.0001478
		FALSE	High	Sequest HT (A2)	Unambiguous	NYSPYYNTIDDLKDQIVDLTVGNNK		1	1	P35527	P35527	1	3	0.5184	0	1	1	968.141	2902.41	2902.41	-0.4	-0.00039	HCD (High Energy Collision Dissociation)	MS2	16.5693	26.903	52.4695	58016	WQR_1_20190806.raw	F4	3.8	0.001475	0.1122
	FALSE	High	DIENQYETQITQIEHEVSSSGQEVQSSAK		3.94524e-06	0	1	1	4	P35527	0	3264.51	High	0	2.497e-06	7.52
		Checked	Confidence	Identifying Node	PSM Ambiguity	Annotated Sequence	Modifications	# Protein Groups	# Proteins	Master Protein Accessions	Protein Accessions	# Missed Cleavages	Charge	DeltaScore	DeltaCn	Rank	Search Engine Rank	m/z [Da]	MH+ [Da]	Theo. MH+ [Da]	DeltaM [ppm]	Deltam/z [Da]	Activation Type	MS Order	Isolation Interference [%]	Ion Inject Time [ms]	RT [min]	First Scan	Spectrum File	File ID	XCorr	Percolator q-Value	Percolator PEP
		FALSE	High	Sequest HT (A2)	Unambiguous	DIENQYETQITQIEHEVSSSGQEVQSSAK		1	1	P35527	P35527	0	3	0.7673	0	1	1	1088.85	3264.52	3264.51	2.55	0.00278	HCD (High Energy Collision Dissociation)	MS2	0	12.034	45.6378	50323	WQR_1_20190806.raw	F4	7.52	0	2.497e-06
		FALSE	High	Sequest HT (A2)	Unambiguous	DIENQYETQITQIEHEVSSSGQEVQSSAK		1	1	P35527	P35527	0	3	0.6686	0	1	1	1088.85	3264.52	3264.51	2.55	0.00278	HCD (High Energy Collision Dissociation)	MS2	0	29.473	45.6372	50322	WQR_1_20190806.raw	F4	7	0	2.096e-05
		FALSE	High	Sequest HT (A2)	Unambiguous	DIENQYETQITQIEHEVSSSGQEVQSSAK		1	1	P35527	P35527	0	3	0.6329	0	1	1	1088.85	3264.52	3264.51	2.44	0.00265	HCD (High Energy Collision Dissociation)	MS2	0	45	45.6018	50283	WQR_1_20190806.raw	F4	6.51	0	5.162e-06
		FALSE	High	Sequest HT (A2)	Unambiguous	DIENQYETQITQIEHEVSSSGQEVQSSAK		1	1	P35527	P35527	0	3	0.6391	0	1	1	1088.85	3264.52	3264.51	2.55	0.00278	HCD (High Energy Collision Dissociation)	MS2	0	45	45.7599	50464	WQR_1_20190806.raw	F4	6.4	0	2.372e-05
	FALSE	High	EIETYHNLLEGGQEDFESSGAGK		0.00111335	0	1	1	4	P35527	0	2510.13	High	0	0.0008916	4.56
		Checked	Confidence	Identifying Node	PSM Ambiguity	Annotated Sequence	Modifications	# Protein Groups	# Proteins	Master Protein Accessions	Protein Accessions	# Missed Cleavages	Charge	DeltaScore	DeltaCn	Rank	Search Engine Rank	m/z [Da]	MH+ [Da]	Theo. MH+ [Da]	DeltaM [ppm]	Deltam/z [Da]	Activation Type	MS Order	Isolation Interference [%]	Ion Inject Time [ms]	RT [min]	First Scan	Spectrum File	File ID	XCorr	Percolator q-Value	Percolator PEP
		FALSE	High	Sequest HT (A2)	Unambiguous	EIETYHNLLEGGQEDFESSGAGK		1	1	P35527	P35527	0	3	0.7566	0	1	1	837.386	2510.14	2510.13	5.22	0.00437	HCD (High Energy Collision Dissociation)	MS2	86.15	2.431	31.7067	33680	WQR_1_20190806.raw	F4	4.56	0	0.0008916
		FALSE	High	Sequest HT (A2)	Unambiguous	EIETYHNLLEGGQEDFESSGAGK		1	1	P35527	P35527	0	3	0.7156	0	1	1	837.386	2510.14	2510.13	5.22	0.00437	HCD (High Energy Collision Dissociation)	MS2	79.9075	3.617	31.7073	33681	WQR_1_20190806.raw	F4	4.36	0	0.001722
		FALSE	High	Sequest HT (A2)	Unambiguous	EIETYHNLLEGGQEDFESSGAGK		1	1	P35527	P35527	0	3	0.6268	0	1	1	837.385	2510.14	2510.13	3.83	0.00321	HCD (High Energy Collision Dissociation)	MS2	77.4381	3.865	31.7194	33696	WQR_1_20190806.raw	F4	4.18	0	0.002497
		FALSE	High	Sequest HT (A2)	Unambiguous	EIETYHNLLEGGQEDFESSGAGK		1	1	P35527	P35527	0	3	0.6582	0	1	1	837.385	2510.14	2510.13	3.91	0.00327	HCD (High Energy Collision Dissociation)	MS2	73.0071	1.591	31.7291	33709	WQR_1_20190806.raw	F4	3.54	0.001475	0.09644
	FALSE	High	HGVQELEIELQSQLSK		2.34212e-06	0	1	1	7	P35527	0	1837.97	High	0	1.451e-06	7.01
		Checked	Confidence	Identifying Node	PSM Ambiguity	Annotated Sequence	Modifications	# Protein Groups	# Proteins	Master Protein Accessions	Protein Accessions	# Missed Cleavages	Charge	DeltaScore	DeltaCn	Rank	Search Engine Rank	m/z [Da]	MH+ [Da]	Theo. MH+ [Da]	DeltaM [ppm]	Deltam/z [Da]	Activation Type	MS Order	Isolation Interference [%]	Ion Inject Time [ms]	RT [min]	First Scan	Spectrum File	File ID	XCorr	Percolator q-Value	Percolator PEP
		FALSE	High	Sequest HT (A2)	Unambiguous	HGVQELEIELQSQLSK		1	1	P35527	P35527	0	3	0.787	0	1	1	613.327	1837.97	1837.97	0.8	0.00049	HCD (High Energy Collision Dissociation)	MS2	3.42944	7.569	37.6137	40854	WQR_1_20190806.raw	F4	4.93	0	0.0003593
		FALSE	High	Sequest HT (A2)	Unambiguous	HGVQELEIELQSQLSK		1	1	P35527	P35527	0	3	0.7908	0	1	1	613.328	1837.97	1837.97	1.8	0.0011	HCD (High Energy Collision Dissociation)	MS2	0	4.508	37.6377	40885	WQR_1_20190806.raw	F4	5.45	0	0.0002255
		FALSE	High	Sequest HT (A2)	Unambiguous	HGVQELEIELQSQLSK		1	1	P35527	P35527	0	2	0.7917	0	1	1	919.49	1837.97	1837.97	4.23	0.00389	HCD (High Energy Collision Dissociation)	MS2	0	23.126	37.6389	40887	WQR_1_20190806.raw	F4	7.01	0	1.451e-06
		FALSE	High	Sequest HT (A2)	Unambiguous	HGVQELEIELQSQLSK		1	1	P35527	P35527	0	3	0.7716	0	1	1	613.328	1837.97	1837.97	1.8	0.0011	HCD (High Energy Collision Dissociation)	MS2	0	4.615	37.6395	40888	WQR_1_20190806.raw	F4	5.21	0	0.0004711
		FALSE	High	Sequest HT (A2)	Unambiguous	HGVQELEIELQSQLSK		1	1	P35527	P35527	0	2	0.7858	0	1	1	919.49	1837.97	1837.97	4.23	0.00389	HCD (High Energy Collision Dissociation)	MS2	6.8895	23.621	37.6402	40889	WQR_1_20190806.raw	F4	6.63	0	1.478e-06
		FALSE	High	Sequest HT (A2)	Unambiguous	HGVQELEIELQSQLSK		1	1	P35527	P35527	0	2	0.818	0	1	1	919.488	1837.97	1837.97	1.84	0.00169	HCD (High Energy Collision Dissociation)	MS2	15.7541	14.95	37.6764	40934	WQR_1_20190806.raw	F4	6.32	0	1.86e-05
		FALSE	High	Sequest HT (A2)	Unambiguous	HGVQELEIELQSQLSK		1	1	P35527	P35527	0	3	0.7984	0	1	1	613.328	1837.97	1837.97	2.7	0.00165	HCD (High Energy Collision Dissociation)	MS2	12.6737	4.659	37.7637	41039	WQR_1_20190806.raw	F4	4.96	0	0.008652
	FALSE	High	HGVQELEIELQSQLSKK		0.000248251	0	1	1	2	P35527	1	1966.06	High	0	0.002614	5.92
		Checked	Confidence	Identifying Node	PSM Ambiguity	Annotated Sequence	Modifications	# Protein Groups	# Proteins	Master Protein Accessions	Protein Accessions	# Missed Cleavages	Charge	DeltaScore	DeltaCn	Rank	Search Engine Rank	m/z [Da]	MH+ [Da]	Theo. MH+ [Da]	DeltaM [ppm]	Deltam/z [Da]	Activation Type	MS Order	Isolation Interference [%]	Ion Inject Time [ms]	RT [min]	First Scan	Spectrum File	File ID	XCorr	Percolator q-Value	Percolator PEP
		FALSE	High	Sequest HT (A2)	Unambiguous	HGVQELEIELQSQLSKK		1	1	P35527	P35527	1	3	0.6971	0	1	1	656.026	1966.06	1966.06	0.91	0.0006	HCD (High Energy Collision Dissociation)	MS2	46.4884	44.298	34.2488	36831	WQR_1_20190806.raw	F4	5.91	0	0.0001866
		FALSE	High	Sequest HT (A2)	Unambiguous	HGVQELEIELQSQLSKK		1	1	P35527	P35527	1	3	0.6503	0	1	1	656.024	1966.06	1966.06	-1.05	-0.00069	HCD (High Energy Collision Dissociation)	MS2	22.4614	45	34.2599	36844	WQR_1_20190806.raw	F4	5.92	0	0.002614
	FALSE	High	GGSGGSYGGGGSGGGYGGGSGSR		2.52785e-06	0	1	1	2	P35527	0	1791.73	High	0	1.569e-06	6.68
		Checked	Confidence	Identifying Node	PSM Ambiguity	Annotated Sequence	Modifications	# Protein Groups	# Proteins	Master Protein Accessions	Protein Accessions	# Missed Cleavages	Charge	DeltaScore	DeltaCn	Rank	Search Engine Rank	m/z [Da]	MH+ [Da]	Theo. MH+ [Da]	DeltaM [ppm]	Deltam/z [Da]	Activation Type	MS Order	Isolation Interference [%]	Ion Inject Time [ms]	RT [min]	First Scan	Spectrum File	File ID	XCorr	Percolator q-Value	Percolator PEP
		FALSE	High	Sequest HT (A2)	Unambiguous	GGSGGSYGGGGSGGGYGGGSGSR		1	1	P35527	P35527	0	2	0.7833	0	1	1	896.366	1791.73	1791.73	-1.29	-0.00116	HCD (High Energy Collision Dissociation)	MS2	0	45	9.0715	6654	WQR_1_20190806.raw	F4	4.66	0	2.933e-05
		FALSE	High	Sequest HT (A2)	Unambiguous	GGSGGSYGGGGSGGGYGGGSGSR		1	1	P35527	P35527	0	2	0.7665	0	1	1	896.368	1791.73	1791.73	0.21	0.00018	HCD (High Energy Collision Dissociation)	MS2	0	45	9.0497	6626	WQR_1_20190806.raw	F4	6.68	0	1.569e-06
	FALSE	High	VQALEEANNDLENK		0.00107623	0	1	1	3	P35527	0	1586.77	High	0	0.000858	4.31
		Checked	Confidence	Identifying Node	PSM Ambiguity	Annotated Sequence	Modifications	# Protein Groups	# Proteins	Master Protein Accessions	Protein Accessions	# Missed Cleavages	Charge	DeltaScore	DeltaCn	Rank	Search Engine Rank	m/z [Da]	MH+ [Da]	Theo. MH+ [Da]	DeltaM [ppm]	Deltam/z [Da]	Activation Type	MS Order	Isolation Interference [%]	Ion Inject Time [ms]	RT [min]	First Scan	Spectrum File	File ID	XCorr	Percolator q-Value	Percolator PEP
		FALSE	High	Sequest HT (A2)	Unambiguous	VQALEEANNDLENK		1	1	P35527	P35527	0	2	0.7587	0	1	1	793.888	1586.77	1586.77	1.47	0.00117	HCD (High Energy Collision Dissociation)	MS2	0	45	19.9803	19336	WQR_1_20190806.raw	F4	4.31	0	0.000858
		FALSE	High	Sequest HT (A2)	Unambiguous	VQALEEANNDLENK		1	1	P35527	P35527	0	2	0.7421	0	1	1	793.887	1586.77	1586.77	0.47	0.00037	HCD (High Energy Collision Dissociation)	MS2	0	6.246	20.0756	19448	WQR_1_20190806.raw	F4	3.18	0	0.004617
		FALSE	High	Sequest HT (A2)	Unambiguous	VQALEEANNDLENK		1	1	P35527	P35527	0	2	0.7429	0	1	1	793.887	1586.77	1586.77	0.47	0.00037	HCD (High Energy Collision Dissociation)	MS2	0	10.839	20.0773	19451	WQR_1_20190806.raw	F4	3.54	0	0.005018
	FALSE	High	VQALEEANNDLENKIQDWYDK		0.00439171	0	1	1	1	P35527	1	2535.2	High	0	0.003725	4.71
		Checked	Confidence	Identifying Node	PSM Ambiguity	Annotated Sequence	Modifications	# Protein Groups	# Proteins	Master Protein Accessions	Protein Accessions	# Missed Cleavages	Charge	DeltaScore	DeltaCn	Rank	Search Engine Rank	m/z [Da]	MH+ [Da]	Theo. MH+ [Da]	DeltaM [ppm]	Deltam/z [Da]	Activation Type	MS Order	Isolation Interference [%]	Ion Inject Time [ms]	RT [min]	First Scan	Spectrum File	File ID	XCorr	Percolator q-Value	Percolator PEP
		FALSE	High	Sequest HT (A2)	Unambiguous	VQALEEANNDLENKIQDWYDK		1	1	P35527	P35527	1	3	0.6837	0	1	1	845.738	2535.2	2535.2	-0.23	-0.0002	HCD (High Energy Collision Dissociation)	MS2	8.29349	26.235	40.1957	43933	WQR_1_20190806.raw	F4	4.71	0	0.003725
	FALSE	High	GGGGSFGYSYGGGSGGGFSASSLGGGFGGGSR		4.11609e-06	0	1	1	2	P35527	0	2705.16	High	0	2.61e-06	7.82
		Checked	Confidence	Identifying Node	PSM Ambiguity	Annotated Sequence	Modifications	# Protein Groups	# Proteins	Master Protein Accessions	Protein Accessions	# Missed Cleavages	Charge	DeltaScore	DeltaCn	Rank	Search Engine Rank	m/z [Da]	MH+ [Da]	Theo. MH+ [Da]	DeltaM [ppm]	Deltam/z [Da]	Activation Type	MS Order	Isolation Interference [%]	Ion Inject Time [ms]	RT [min]	First Scan	Spectrum File	File ID	XCorr	Percolator q-Value	Percolator PEP
		FALSE	High	Sequest HT (A2)	Unambiguous	GGGGSFGYSYGGGSGGGFSASSLGGGFGGGSR		1	1	P35527	P35527	0	2	0.8798	0	1	1	1353.08	2705.16	2705.16	-0.52	-0.0007	HCD (High Energy Collision Dissociation)	MS2	0	45	36.3681	39402	WQR_1_20190806.raw	F4	7.82	0	2.61e-06
		FALSE	High	Sequest HT (A2)	Unambiguous	GGGGSFGYSYGGGSGGGFSASSLGGGFGGGSR		1	1	P35527	P35527	0	3	0.5685	0	1	1	902.394	2705.17	2705.16	2.19	0.00197	HCD (High Energy Collision Dissociation)	MS2	25.5003	35.57	36.3944	39437	WQR_1_20190806.raw	F4	3.87	0.002119	0.141
	FALSE	High	FSSSSGYGGGSSR		0.00717372	0	1	1	1	P35527	0	1235.53	High	0	0.006207	3.16
		Checked	Confidence	Identifying Node	PSM Ambiguity	Annotated Sequence	Modifications	# Protein Groups	# Proteins	Master Protein Accessions	Protein Accessions	# Missed Cleavages	Charge	DeltaScore	DeltaCn	Rank	Search Engine Rank	m/z [Da]	MH+ [Da]	Theo. MH+ [Da]	DeltaM [ppm]	Deltam/z [Da]	Activation Type	MS Order	Isolation Interference [%]	Ion Inject Time [ms]	RT [min]	First Scan	Spectrum File	File ID	XCorr	Percolator q-Value	Percolator PEP
		FALSE	High	Sequest HT (A2)	Unambiguous	FSSSSGYGGGSSR		1	1	P35527	P35527	0	2	0.8259	0	1	1	618.27	1235.53	1235.53	2.48	0.00153	HCD (High Energy Collision Dissociation)	MS2	0	45	9.5936	7274	WQR_1_20190806.raw	F4	3.16	0	0.006207
	FALSE	High	QGVDADINGLR		0.0278123	0.00152962	1	1	1	P35527	0	1157.59	High	0.0007925	0.02539	3.76
		Checked	Confidence	Identifying Node	PSM Ambiguity	Annotated Sequence	Modifications	# Protein Groups	# Proteins	Master Protein Accessions	Protein Accessions	# Missed Cleavages	Charge	DeltaScore	DeltaCn	Rank	Search Engine Rank	m/z [Da]	MH+ [Da]	Theo. MH+ [Da]	DeltaM [ppm]	Deltam/z [Da]	Activation Type	MS Order	Isolation Interference [%]	Ion Inject Time [ms]	RT [min]	First Scan	Spectrum File	File ID	XCorr	Percolator q-Value	Percolator PEP
		FALSE	High	Sequest HT (A2)	Unambiguous	QGVDADINGLR		1	1	P35527	P35527	0	2	0.6676	0	1	1	579.299	1157.59	1157.59	0.06	3e-05	HCD (High Energy Collision Dissociation)	MS2	23.3265	4.075	20.9297	20485	WQR_1_20190806.raw	F4	3.76	0.0007925	0.02539
	FALSE	High	STMQELNSR		0.0702051	0.00152962	1	1	1	P35527	0	1065.5	High	0.0007925	0.06624	2.57
		Checked	Confidence	Identifying Node	PSM Ambiguity	Annotated Sequence	Modifications	# Protein Groups	# Proteins	Master Protein Accessions	Protein Accessions	# Missed Cleavages	Charge	DeltaScore	DeltaCn	Rank	Search Engine Rank	m/z [Da]	MH+ [Da]	Theo. MH+ [Da]	DeltaM [ppm]	Deltam/z [Da]	Activation Type	MS Order	Isolation Interference [%]	Ion Inject Time [ms]	RT [min]	First Scan	Spectrum File	File ID	XCorr	Percolator q-Value	Percolator PEP
		FALSE	High	Sequest HT (A2)	Unambiguous	STMQELNSR		1	1	P35527	P35527	0	2	0.6654	0	1	1	533.254	1065.5	1065.5	0.56	0.0003	HCD (High Energy Collision Dissociation)	MS2	32.5052	45	11.7125	9720	WQR_1_20190806.raw	F4	2.57	0.0007925	0.06624
	FALSE	High	QVLDNLTMEK		0.0354874	0.00152962	1	1	1	P35527	0	1190.61	High	0.0007925	0.03263	2.33
		Checked	Confidence	Identifying Node	PSM Ambiguity	Annotated Sequence	Modifications	# Protein Groups	# Proteins	Master Protein Accessions	Protein Accessions	# Missed Cleavages	Charge	DeltaScore	DeltaCn	Rank	Search Engine Rank	m/z [Da]	MH+ [Da]	Theo. MH+ [Da]	DeltaM [ppm]	Deltam/z [Da]	Activation Type	MS Order	Isolation Interference [%]	Ion Inject Time [ms]	RT [min]	First Scan	Spectrum File	File ID	XCorr	Percolator q-Value	Percolator PEP
		FALSE	High	Sequest HT (A2)	Unambiguous	QVLDNLTMEK		1	1	P35527	P35527	0	2	0.3991	0	1	1	595.81	1190.61	1190.61	2.99	0.00178	HCD (High Energy Collision Dissociation)	MS2	37.0451	44.152	23.8144	24004	WQR_1_20190806.raw	F4	2.33	0.0007925	0.03263
	FALSE	High	TLNDMRQEYEQLIAK	1xOxidation [M5]	0.0595155	0.00152962	1	1	1	P35527	1	1867.92	High	0.0007925	0.05594	2.88
		Checked	Confidence	Identifying Node	PSM Ambiguity	Annotated Sequence	Modifications	# Protein Groups	# Proteins	Master Protein Accessions	Protein Accessions	# Missed Cleavages	Charge	DeltaScore	DeltaCn	Rank	Search Engine Rank	m/z [Da]	MH+ [Da]	Theo. MH+ [Da]	DeltaM [ppm]	Deltam/z [Da]	Activation Type	MS Order	Isolation Interference [%]	Ion Inject Time [ms]	RT [min]	First Scan	Spectrum File	File ID	XCorr	Percolator q-Value	Percolator PEP
		FALSE	High	Sequest HT (A2)	Unambiguous	TLNDmRQEYEQLIAK	M5(Oxidation)	1	1	P35527	P35527	1	3	0.4583	0	1	1	623.314	1867.93	1867.92	2.65	0.00165	HCD (High Energy Collision Dissociation)	MS2	0	45	26.1437	26818	WQR_1_20190806.raw	F4	2.88	0.0007925	0.05594
	FALSE	High	IKFEMEQNLR	1xOxidation [M5]	0.0759096	0.00152962	1	1	1	P35527	1	1323.67	High	0.0007925	0.07186	2.28
		Checked	Confidence	Identifying Node	PSM Ambiguity	Annotated Sequence	Modifications	# Protein Groups	# Proteins	Master Protein Accessions	Protein Accessions	# Missed Cleavages	Charge	DeltaScore	DeltaCn	Rank	Search Engine Rank	m/z [Da]	MH+ [Da]	Theo. MH+ [Da]	DeltaM [ppm]	Deltam/z [Da]	Activation Type	MS Order	Isolation Interference [%]	Ion Inject Time [ms]	RT [min]	First Scan	Spectrum File	File ID	XCorr	Percolator q-Value	Percolator PEP
		FALSE	High	Sequest HT (A2)	Unambiguous	IKFEmEQNLR	M5(Oxidation)	1	1	P35527	P35527	1	3	0.4781	0	1	1	441.897	1323.68	1323.67	1.98	0.00088	HCD (High Energy Collision Dissociation)	MS2	41.1517	8.457	16.095	14804	WQR_1_20190806.raw	F4	2.28	0.0007925	0.07186
	FALSE	High	IQDWYDKK		0.126599	0.00267473	1	1	1	P35527	1	1095.55	High	0.002119	0.1219	2.25
		Checked	Confidence	Identifying Node	PSM Ambiguity	Annotated Sequence	Modifications	# Protein Groups	# Proteins	Master Protein Accessions	Protein Accessions	# Missed Cleavages	Charge	DeltaScore	DeltaCn	Rank	Search Engine Rank	m/z [Da]	MH+ [Da]	Theo. MH+ [Da]	DeltaM [ppm]	Deltam/z [Da]	Activation Type	MS Order	Isolation Interference [%]	Ion Inject Time [ms]	RT [min]	First Scan	Spectrum File	File ID	XCorr	Percolator q-Value	Percolator PEP
		FALSE	High	Sequest HT (A2)	Unambiguous	IQDWYDKK		1	1	P35527	P35527	1	2	0.4489	0	1	1	548.276	1095.55	1095.55	-1.24	-0.00068	HCD (High Energy Collision Dissociation)	MS2	23.0024	22.471	14.5011	12993	WQR_1_20190806.raw	F4	2.25	0.002119	0.1219
	FALSE	High	FEMEQNLR		0.13714	0.00267473	1	1	1	P35527	0	1066.5	High	0.002119	0.1324	1.93
		Checked	Confidence	Identifying Node	PSM Ambiguity	Annotated Sequence	Modifications	# Protein Groups	# Proteins	Master Protein Accessions	Protein Accessions	# Missed Cleavages	Charge	DeltaScore	DeltaCn	Rank	Search Engine Rank	m/z [Da]	MH+ [Da]	Theo. MH+ [Da]	DeltaM [ppm]	Deltam/z [Da]	Activation Type	MS Order	Isolation Interference [%]	Ion Inject Time [ms]	RT [min]	First Scan	Spectrum File	File ID	XCorr	Percolator q-Value	Percolator PEP
		FALSE	High	Sequest HT (A2)	Unambiguous	FEMEQNLR		1	1	P35527	P35527	0	2	0.6062	0	1	1	533.753	1066.5	1066.5	0.67	0.00035	HCD (High Energy Collision Dissociation)	MS2	0	41.104	20.2608	19674	WQR_1_20190806.raw	F4	1.93	0.002119	0.1324
	FALSE	High	QEYEQLIAK		0.110861	0.00267473	1	1	2	P35527	0	1121.58	High	0.00453	0.2409	2.71
		Checked	Confidence	Identifying Node	PSM Ambiguity	Annotated Sequence	Modifications	# Protein Groups	# Proteins	Master Protein Accessions	Protein Accessions	# Missed Cleavages	Charge	DeltaScore	DeltaCn	Rank	Search Engine Rank	m/z [Da]	MH+ [Da]	Theo. MH+ [Da]	DeltaM [ppm]	Deltam/z [Da]	Activation Type	MS Order	Isolation Interference [%]	Ion Inject Time [ms]	RT [min]	First Scan	Spectrum File	File ID	XCorr	Percolator q-Value	Percolator PEP
		FALSE	High	Sequest HT (A2)	Unambiguous	QEYEQLIAK		1	1	P35527	P35527	0	2	0.5535	0	1	1	561.296	1121.59	1121.58	1.48	0.00083	HCD (High Energy Collision Dissociation)	MS2	3.62245	8.231	20.306	19727	WQR_1_20190806.raw	F4	2.71	0.001475	0.1063
		FALSE	High	Sequest HT (A2)	Unambiguous	QEYEQLIAK		1	1	P35527	P35527	0	2	0.5941	0	1	1	561.296	1121.59	1121.58	1.48	0.00083	HCD (High Energy Collision Dissociation)	MS2	13.3411	19.055	20.3104	19733	WQR_1_20190806.raw	F4	2.71	0.00453	0.2409
	FALSE	High	QFSSSYLSR		0.156358	0.00381703	1	1	1	P35527	0	1074.52	High	0.002731	0.1516	2.19
		Checked	Confidence	Identifying Node	PSM Ambiguity	Annotated Sequence	Modifications	# Protein Groups	# Proteins	Master Protein Accessions	Protein Accessions	# Missed Cleavages	Charge	DeltaScore	DeltaCn	Rank	Search Engine Rank	m/z [Da]	MH+ [Da]	Theo. MH+ [Da]	DeltaM [ppm]	Deltam/z [Da]	Activation Type	MS Order	Isolation Interference [%]	Ion Inject Time [ms]	RT [min]	First Scan	Spectrum File	File ID	XCorr	Percolator q-Value	Percolator PEP
		FALSE	High	Sequest HT (A2)	Unambiguous	QFSSSYLSR		1	1	P35527	P35527	0	2	0.5251	0	1	1	537.764	1074.52	1074.52	-0.72	-0.00039	HCD (High Energy Collision Dissociation)	MS2	55.7113	28.316	19.5175	18802	WQR_1_20190806.raw	F4	2.19	0.002731	0.1516
	FALSE	High	FEMEQNLR	1xOxidation [M3]	0.18299	0.00497177	1	1	1	P35527	0	1082.49	High	0.003364	0.1784	1.92
		Checked	Confidence	Identifying Node	PSM Ambiguity	Annotated Sequence	Modifications	# Protein Groups	# Proteins	Master Protein Accessions	Protein Accessions	# Missed Cleavages	Charge	DeltaScore	DeltaCn	Rank	Search Engine Rank	m/z [Da]	MH+ [Da]	Theo. MH+ [Da]	DeltaM [ppm]	Deltam/z [Da]	Activation Type	MS Order	Isolation Interference [%]	Ion Inject Time [ms]	RT [min]	First Scan	Spectrum File	File ID	XCorr	Percolator q-Value	Percolator PEP
		FALSE	High	Sequest HT (A2)	Unambiguous	FEmEQNLR	M3(Oxidation)	1	1	P35527	P35527	0	2	0.4323	0	1	1	541.752	1082.5	1082.49	3.1	0.00168	HCD (High Energy Collision Dissociation)	MS2	42.6078	45	12.3383	10451	WQR_1_20190806.raw	F4	1.92	0.003364	0.1784
	FALSE	High	MTLDDFR		0.232271	0.00596215	1	1	1	P35527	0	897.413	High	0.00393	0.2277	2.12
		Checked	Confidence	Identifying Node	PSM Ambiguity	Annotated Sequence	Modifications	# Protein Groups	# Proteins	Master Protein Accessions	Protein Accessions	# Missed Cleavages	Charge	DeltaScore	DeltaCn	Rank	Search Engine Rank	m/z [Da]	MH+ [Da]	Theo. MH+ [Da]	DeltaM [ppm]	Deltam/z [Da]	Activation Type	MS Order	Isolation Interference [%]	Ion Inject Time [ms]	RT [min]	First Scan	Spectrum File	File ID	XCorr	Percolator q-Value	Percolator PEP
		FALSE	High	Sequest HT (A2)	Unambiguous	MTLDDFR		1	1	P35527	P35527	0	2	0.6179	0	1	1	449.21	897.413	897.413	-0.32	-0.00014	HCD (High Energy Collision Dissociation)	MS2	15.5351	44.65	26.121	26793	WQR_1_20190806.raw	F4	2.12	0.00393	0.2277
FALSE	High	Master Protein	Q4VCS5	Angiomotin OS=Homo sapiens OX=9606 GN=AMOT PE=1 SV=1	0	75.323	35	33	56	32	1	1084	118	7.64	187.21	33
	Checked	Confidence	Sequence	Modifications	Qvality PEP	Qvality q-value	# Protein Groups	# Proteins	# PSMs	Master Protein Accessions	# Missed Cleavages	Theo. MH+ [Da]	Confidence (by Search Engine): Sequest HT	Percolator q-Value (by Search Engine): Sequest HT	Percolator PEP (by Search Engine): Sequest HT	XCorr (by Search Engine): Sequest HT
	FALSE	High	IQKEEEEILMANKR		0.000124917	0	1	1	5	Q4VCS5	2	1730.91	High	0	0.0008478	4.47
		Checked	Confidence	Identifying Node	PSM Ambiguity	Annotated Sequence	Modifications	# Protein Groups	# Proteins	Master Protein Accessions	Protein Accessions	# Missed Cleavages	Charge	DeltaScore	DeltaCn	Rank	Search Engine Rank	m/z [Da]	MH+ [Da]	Theo. MH+ [Da]	DeltaM [ppm]	Deltam/z [Da]	Activation Type	MS Order	Isolation Interference [%]	Ion Inject Time [ms]	RT [min]	First Scan	Spectrum File	File ID	XCorr	Percolator q-Value	Percolator PEP
		FALSE	High	Sequest HT (A2)	Unambiguous	IQKEEEEILMANKR		1	1	Q4VCS5	Q4VCS5	2	3	0.651	0	1	1	577.643	1730.91	1730.91	1.42	0.00082	HCD (High Energy Collision Dissociation)	MS2	13.3336	3.321	17.2141	16086	WQR_1_20190806.raw	F4	4.47	0	0.0008478
		FALSE	High	Sequest HT (A2)	Unambiguous	IQKEEEEILMANKR		1	1	Q4VCS5	Q4VCS5	2	3	0.6429	0	1	1	577.643	1730.91	1730.91	1.42	0.00082	HCD (High Energy Collision Dissociation)	MS2	12.2858	3.215	17.2233	16100	WQR_1_20190806.raw	F4	4.34	0	9.128e-05
		FALSE	High	Sequest HT (A2)	Unambiguous	IQKEEEEILMANKR		1	1	Q4VCS5	Q4VCS5	2	3	0.6413	0	1	1	577.643	1730.91	1730.91	1.63	0.00094	HCD (High Energy Collision Dissociation)	MS2	7.07331	4.191	17.2595	16146	WQR_1_20190806.raw	F4	4.21	0	0.001883
		FALSE	High	Sequest HT (A2)	Unambiguous	IQKEEEEILMANKR		1	1	Q4VCS5	Q4VCS5	2	4	0.4957	0	1	1	433.484	1730.91	1730.91	1.06	0.00046	HCD (High Energy Collision Dissociation)	MS2	7.88332	15.034	17.1854	16049	WQR_1_20190806.raw	F4	3.45	0.0007925	0.04298
		FALSE	High	Sequest HT (A2)	Unambiguous	IQKEEEEILMANKR		1	1	Q4VCS5	Q4VCS5	2	4	0.449	0	1	1	433.483	1730.91	1730.91	0.92	0.0004	HCD (High Energy Collision Dissociation)	MS2	8.57937	10.315	17.245	16128	WQR_1_20190806.raw	F4	2.94	0.0007925	0.03634
	FALSE	High	IQKEEEEILMANK		0.00690585	0	1	1	2	Q4VCS5	1	1574.81	High	0	0.008979	3.96
		Checked	Confidence	Identifying Node	PSM Ambiguity	Annotated Sequence	Modifications	# Protein Groups	# Proteins	Master Protein Accessions	Protein Accessions	# Missed Cleavages	Charge	DeltaScore	DeltaCn	Rank	Search Engine Rank	m/z [Da]	MH+ [Da]	Theo. MH+ [Da]	DeltaM [ppm]	Deltam/z [Da]	Activation Type	MS Order	Isolation Interference [%]	Ion Inject Time [ms]	RT [min]	First Scan	Spectrum File	File ID	XCorr	Percolator q-Value	Percolator PEP
		FALSE	High	Sequest HT (A2)	Unambiguous	IQKEEEEILMANK		1	1	Q4VCS5	Q4VCS5	1	2	0.6278	0	1	1	787.909	1574.81	1574.81	1.28	0.00101	HCD (High Energy Collision Dissociation)	MS2	0	15.696	20.1306	19516	WQR_1_20190806.raw	F4	3.95	0	0.005967
		FALSE	High	Sequest HT (A2)	Unambiguous	IQKEEEEILMANK		1	1	Q4VCS5	Q4VCS5	1	2	0.6616	0	1	1	787.909	1574.81	1574.81	1.28	0.00101	HCD (High Energy Collision Dissociation)	MS2	0	9.98	20.1312	19517	WQR_1_20190806.raw	F4	3.96	0	0.008979
	FALSE	High	LSIPSLTCNPDKTDGPVFHSNTLER	1xCarbamidomethyl [C8]	0.00115175	0	1	1	1	Q4VCS5	1	2798.38	High	0	0.0009228	3.51
		Checked	Confidence	Identifying Node	PSM Ambiguity	Annotated Sequence	Modifications	# Protein Groups	# Proteins	Master Protein Accessions	Protein Accessions	# Missed Cleavages	Charge	DeltaScore	DeltaCn	Rank	Search Engine Rank	m/z [Da]	MH+ [Da]	Theo. MH+ [Da]	DeltaM [ppm]	Deltam/z [Da]	Activation Type	MS Order	Isolation Interference [%]	Ion Inject Time [ms]	RT [min]	First Scan	Spectrum File	File ID	XCorr	Percolator q-Value	Percolator PEP
		FALSE	High	Sequest HT (A2)	Unambiguous	LSIPSLTcNPDKTDGPVFHSNTLER	C8(Carbamidomethyl)	1	1	Q4VCS5	Q4VCS5	1	3	0.6467	0	1	1	933.455	2798.35	2798.38	-9.74	-0.00909	HCD (High Energy Collision Dissociation)	MS2	0	45	32.3384	34472	WQR_1_20190806.raw	F4	3.51	0	0.0009228
	FALSE	High	KQVYVDKVEK		0.0256741	0	1	1	1	Q4VCS5	2	1235.7	High	0	0.0234	4.04
		Checked	Confidence	Identifying Node	PSM Ambiguity	Annotated Sequence	Modifications	# Protein Groups	# Proteins	Master Protein Accessions	Protein Accessions	# Missed Cleavages	Charge	DeltaScore	DeltaCn	Rank	Search Engine Rank	m/z [Da]	MH+ [Da]	Theo. MH+ [Da]	DeltaM [ppm]	Deltam/z [Da]	Activation Type	MS Order	Isolation Interference [%]	Ion Inject Time [ms]	RT [min]	First Scan	Spectrum File	File ID	XCorr	Percolator q-Value	Percolator PEP
		FALSE	High	Sequest HT (A2)	Unambiguous	KQVYVDKVEK		1	1	Q4VCS5	Q4VCS5	2	3	0.6386	0	1	1	412.571	1235.7	1235.7	-0.15	-6e-05	HCD (High Energy Collision Dissociation)	MS2	53.2065	8.2	8.3865	5829	WQR_1_20190806.raw	F4	4.04	0	0.0234
	FALSE	High	MQQALVQLQAACEK	1xCarbamidomethyl [C12]	0.00196441	0	1	1	4	Q4VCS5	0	1617.81	High	0	0.001605	4.53
		Checked	Confidence	Identifying Node	PSM Ambiguity	Annotated Sequence	Modifications	# Protein Groups	# Proteins	Master Protein Accessions	Protein Accessions	# Missed Cleavages	Charge	DeltaScore	DeltaCn	Rank	Search Engine Rank	m/z [Da]	MH+ [Da]	Theo. MH+ [Da]	DeltaM [ppm]	Deltam/z [Da]	Activation Type	MS Order	Isolation Interference [%]	Ion Inject Time [ms]	RT [min]	First Scan	Spectrum File	File ID	XCorr	Percolator q-Value	Percolator PEP
		FALSE	High	Sequest HT (A2)	Unambiguous	MQQALVQLQAAcEK	C12(Carbamidomethyl)	1	1	Q4VCS5	Q4VCS5	0	2	0.6703	0	1	1	809.408	1617.81	1617.81	0.33	0.00026	HCD (High Energy Collision Dissociation)	MS2	0	43.249	24.8593	25279	WQR_1_20190806.raw	F4	3.7	0	0.008326
		FALSE	High	Sequest HT (A2)	Unambiguous	MQQALVQLQAAcEK	C12(Carbamidomethyl)	1	1	Q4VCS5	Q4VCS5	0	2	0.67	0	1	1	809.408	1617.81	1617.81	0.33	0.00026	HCD (High Energy Collision Dissociation)	MS2	0	45	24.8619	25282	WQR_1_20190806.raw	F4	4.03	0	0.002042
		FALSE	High	Sequest HT (A2)	Unambiguous	MQQALVQLQAAcEK	C12(Carbamidomethyl)	1	1	Q4VCS5	Q4VCS5	0	2	0.6711	0	1	1	809.408	1617.81	1617.81	0.48	0.00039	HCD (High Energy Collision Dissociation)	MS2	0	16.995	24.912	25339	WQR_1_20190806.raw	F4	4.53	0	0.001605
		FALSE	High	Sequest HT (A2)	Unambiguous	MQQALVQLQAAcEK	C12(Carbamidomethyl)	1	1	Q4VCS5	Q4VCS5	0	2	0.6788	0	1	1	809.409	1617.81	1617.81	0.78	0.00063	HCD (High Energy Collision Dissociation)	MS2	13.8573	44.646	25.0421	25496	WQR_1_20190806.raw	F4	3.58	0	0.008339
	FALSE	High	SLMSISNAGSGLLSHSSTLTGSPIMEEK	1xOxidation [M3]	0.000779828	0	1	1	1	Q4VCS5	0	2850.39	High	0	0.0006144	4.58
		Checked	Confidence	Identifying Node	PSM Ambiguity	Annotated Sequence	Modifications	# Protein Groups	# Proteins	Master Protein Accessions	Protein Accessions	# Missed Cleavages	Charge	DeltaScore	DeltaCn	Rank	Search Engine Rank	m/z [Da]	MH+ [Da]	Theo. MH+ [Da]	DeltaM [ppm]	Deltam/z [Da]	Activation Type	MS Order	Isolation Interference [%]	Ion Inject Time [ms]	RT [min]	First Scan	Spectrum File	File ID	XCorr	Percolator q-Value	Percolator PEP
		FALSE	High	Sequest HT (A2)	Unambiguous	SLmSISNAGSGLLSHSSTLTGSPIMEEK	M3(Oxidation)	1	1	Q4VCS5	Q4VCS5	0	3	0.6681	0	1	1	950.808	2850.41	2850.39	8.55	0.00812	HCD (High Energy Collision Dissociation)	MS2	35.0635	45	37.9386	41243	WQR_1_20190806.raw	F4	4.58	0	0.0006144
	FALSE	High	SLMSISNAGSGLLSHSSTLTGSPIMEEK		5.08505e-05	0	1	1	1	Q4VCS5	0	2834.39	High	0	3.578e-05	6.33
		Checked	Confidence	Identifying Node	PSM Ambiguity	Annotated Sequence	Modifications	# Protein Groups	# Proteins	Master Protein Accessions	Protein Accessions	# Missed Cleavages	Charge	DeltaScore	DeltaCn	Rank	Search Engine Rank	m/z [Da]	MH+ [Da]	Theo. MH+ [Da]	DeltaM [ppm]	Deltam/z [Da]	Activation Type	MS Order	Isolation Interference [%]	Ion Inject Time [ms]	RT [min]	First Scan	Spectrum File	File ID	XCorr	Percolator q-Value	Percolator PEP
		FALSE	High	Sequest HT (A2)	Unambiguous	SLMSISNAGSGLLSHSSTLTGSPIMEEK		1	1	Q4VCS5	Q4VCS5	0	3	0.6303	0	1	1	945.472	2834.4	2834.39	3.21	0.00303	HCD (High Energy Collision Dissociation)	MS2	13.8509	37.504	41.3997	45377	WQR_1_20190806.raw	F4	6.33	0	3.578e-05
	FALSE	High	QGNCQPTNVSEYNAAALMELLR	1xCarbamidomethyl [C4]	0.000402516	0	1	1	1	Q4VCS5	0	2479.17	High	0	0.000308	4.88
		Checked	Confidence	Identifying Node	PSM Ambiguity	Annotated Sequence	Modifications	# Protein Groups	# Proteins	Master Protein Accessions	Protein Accessions	# Missed Cleavages	Charge	DeltaScore	DeltaCn	Rank	Search Engine Rank	m/z [Da]	MH+ [Da]	Theo. MH+ [Da]	DeltaM [ppm]	Deltam/z [Da]	Activation Type	MS Order	Isolation Interference [%]	Ion Inject Time [ms]	RT [min]	First Scan	Spectrum File	File ID	XCorr	Percolator q-Value	Percolator PEP
		FALSE	High	Sequest HT (A2)	Unambiguous	QGNcQPTNVSEYNAAALMELLR	C4(Carbamidomethyl)	1	1	Q4VCS5	Q4VCS5	0	3	0.6865	0	1	1	827.062	2479.17	2479.17	0.72	0.0006	HCD (High Energy Collision Dissociation)	MS2	17.359	25.856	50.9572	56335	WQR_1_20190806.raw	F4	4.88	0	0.000308
	FALSE	High	NSEEQPSGGTTVLQR		0.000713407	0	1	1	2	Q4VCS5	0	1602.77	High	0	0.0005604	4.1
		Checked	Confidence	Identifying Node	PSM Ambiguity	Annotated Sequence	Modifications	# Protein Groups	# Proteins	Master Protein Accessions	Protein Accessions	# Missed Cleavages	Charge	DeltaScore	DeltaCn	Rank	Search Engine Rank	m/z [Da]	MH+ [Da]	Theo. MH+ [Da]	DeltaM [ppm]	Deltam/z [Da]	Activation Type	MS Order	Isolation Interference [%]	Ion Inject Time [ms]	RT [min]	First Scan	Spectrum File	File ID	XCorr	Percolator q-Value	Percolator PEP
		FALSE	High	Sequest HT (A2)	Unambiguous	NSEEQPSGGTTVLQR		1	1	Q4VCS5	Q4VCS5	0	2	0.6768	0	1	1	801.891	1602.77	1602.77	1.96	0.00157	HCD (High Energy Collision Dissociation)	MS2	0	45	13.8604	12247	WQR_1_20190806.raw	F4	3.96	0	0.002134
		FALSE	High	Sequest HT (A2)	Unambiguous	NSEEQPSGGTTVLQR		1	1	Q4VCS5	Q4VCS5	0	2	0.7146	0	1	1	801.89	1602.77	1602.77	0.74	0.0006	HCD (High Energy Collision Dissociation)	MS2	13.0472	39.056	13.9056	12295	WQR_1_20190806.raw	F4	4.1	0	0.0005604
	FALSE	High	MQNNEELPTYEEAK		0.0180926	0	1	1	1	Q4VCS5	0	1695.75	High	0	0.01621	3.37
		Checked	Confidence	Identifying Node	PSM Ambiguity	Annotated Sequence	Modifications	# Protein Groups	# Proteins	Master Protein Accessions	Protein Accessions	# Missed Cleavages	Charge	DeltaScore	DeltaCn	Rank	Search Engine Rank	m/z [Da]	MH+ [Da]	Theo. MH+ [Da]	DeltaM [ppm]	Deltam/z [Da]	Activation Type	MS Order	Isolation Interference [%]	Ion Inject Time [ms]	RT [min]	First Scan	Spectrum File	File ID	XCorr	Percolator q-Value	Percolator PEP
		FALSE	High	Sequest HT (A2)	Unambiguous	MQNNEELPTYEEAK		1	1	Q4VCS5	Q4VCS5	0	2	0.6677	0	1	1	848.379	1695.75	1695.75	-0.83	-0.0007	HCD (High Energy Collision Dissociation)	MS2	0	45	19.7644	19087	WQR_1_20190806.raw	F4	3.37	0	0.01621
	FALSE	High	EKEKLEAELATAR		0.0160762	0	1	1	2	Q4VCS5	2	1487.81	High	0	0.01437	3.64
		Checked	Confidence	Identifying Node	PSM Ambiguity	Annotated Sequence	Modifications	# Protein Groups	# Proteins	Master Protein Accessions	Protein Accessions	# Missed Cleavages	Charge	DeltaScore	DeltaCn	Rank	Search Engine Rank	m/z [Da]	MH+ [Da]	Theo. MH+ [Da]	DeltaM [ppm]	Deltam/z [Da]	Activation Type	MS Order	Isolation Interference [%]	Ion Inject Time [ms]	RT [min]	First Scan	Spectrum File	File ID	XCorr	Percolator q-Value	Percolator PEP
		FALSE	High	Sequest HT (A2)	Unambiguous	EKEKLEAELATAR		1	1	Q4VCS5	Q4VCS5	2	3	0.5302	0	1	1	496.608	1487.81	1487.81	1.44	0.00071	HCD (High Energy Collision Dissociation)	MS2	64.9721	38.438	15.025	13597	WQR_1_20190806.raw	F4	3.64	0	0.01437
		FALSE	High	Sequest HT (A2)	Unambiguous	EKEKLEAELATAR		1	1	Q4VCS5	Q4VCS5	2	3	0.6079	0	1	1	496.608	1487.81	1487.81	1.13	0.00056	HCD (High Energy Collision Dissociation)	MS2	18.4333	11.371	15.0338	13607	WQR_1_20190806.raw	F4	3.29	0.0007925	0.02943
	FALSE	High	DTTVISHSPNTSYDTALEAR		0.000176847	0	1	1	1	Q4VCS5	0	2178.03	High	0	0.0001311	4.78
		Checked	Confidence	Identifying Node	PSM Ambiguity	Annotated Sequence	Modifications	# Protein Groups	# Proteins	Master Protein Accessions	Protein Accessions	# Missed Cleavages	Charge	DeltaScore	DeltaCn	Rank	Search Engine Rank	m/z [Da]	MH+ [Da]	Theo. MH+ [Da]	DeltaM [ppm]	Deltam/z [Da]	Activation Type	MS Order	Isolation Interference [%]	Ion Inject Time [ms]	RT [min]	First Scan	Spectrum File	File ID	XCorr	Percolator q-Value	Percolator PEP
		FALSE	High	Sequest HT (A2)	Unambiguous	DTTVISHSPNTSYDTALEAR		1	1	Q4VCS5	Q4VCS5	0	3	0.7385	0	1	1	726.684	2178.04	2178.03	2.52	0.00183	HCD (High Energy Collision Dissociation)	MS2	9.82359	11.076	22.9973	23004	WQR_1_20190806.raw	F4	4.78	0	0.0001311
	FALSE	High	AEYVPSTPSPVPPSTPLLSAHSK		0.000750636	0	1	1	4	Q4VCS5	0	2362.23	High	0.0007925	0.0616	5.08
		Checked	Confidence	Identifying Node	PSM Ambiguity	Annotated Sequence	Modifications	# Protein Groups	# Proteins	Master Protein Accessions	Protein Accessions	# Missed Cleavages	Charge	DeltaScore	DeltaCn	Rank	Search Engine Rank	m/z [Da]	MH+ [Da]	Theo. MH+ [Da]	DeltaM [ppm]	Deltam/z [Da]	Activation Type	MS Order	Isolation Interference [%]	Ion Inject Time [ms]	RT [min]	First Scan	Spectrum File	File ID	XCorr	Percolator q-Value	Percolator PEP
		FALSE	High	Sequest HT (A2)	Unambiguous	AEYVPSTPSPVPPSTPLLSAHSK		1	1	Q4VCS5	Q4VCS5	0	3	0.8131	0	1	1	788.083	2362.23	2362.23	1.81	0.00143	HCD (High Energy Collision Dissociation)	MS2	12.629	39.228	29.9202	31466	WQR_1_20190806.raw	F4	5.03	0	0.0005914
		FALSE	High	Sequest HT (A2)	Unambiguous	AEYVPSTPSPVPPSTPLLSAHSK		1	1	Q4VCS5	Q4VCS5	0	3	0.815	0	1	1	788.081	2362.23	2362.23	0.26	0.00021	HCD (High Energy Collision Dissociation)	MS2	0	31.554	29.9008	31443	WQR_1_20190806.raw	F4	5.08	0.0007925	0.0616
		FALSE	High	Sequest HT (A2)	Unambiguous	AEYVPSTPSPVPPSTPLLSAHSK		1	1	Q4VCS5	Q4VCS5	0	3	0.7838	0	1	1	788.081	2362.23	2362.23	0.26	0.00021	HCD (High Energy Collision Dissociation)	MS2	0	38.981	29.9052	31449	WQR_1_20190806.raw	F4	4.81	0.00393	0.1978
		FALSE	High	Sequest HT (A2)	Unambiguous	AEYVPSTPSPVPPSTPLLSAHSK		1	1	Q4VCS5	Q4VCS5	0	3	0.7225	0	1	1	788.082	2362.23	2362.23	1.58	0.00125	HCD (High Energy Collision Dissociation)	MS2	0	45	30.0096	31570	WQR_1_20190806.raw	F4	4.72	0.005146	0.2441
	FALSE	High	AQPSSASYQPVPADPFAIVSR		0.00352408	0	1	1	2	Q4VCS5	0	2188.1	High	0	0.01919	5.58
		Checked	Confidence	Identifying Node	PSM Ambiguity	Annotated Sequence	Modifications	# Protein Groups	# Proteins	Master Protein Accessions	Protein Accessions	# Missed Cleavages	Charge	DeltaScore	DeltaCn	Rank	Search Engine Rank	m/z [Da]	MH+ [Da]	Theo. MH+ [Da]	DeltaM [ppm]	Deltam/z [Da]	Activation Type	MS Order	Isolation Interference [%]	Ion Inject Time [ms]	RT [min]	First Scan	Spectrum File	File ID	XCorr	Percolator q-Value	Percolator PEP
		FALSE	High	Sequest HT (A2)	Unambiguous	AQPSSASYQPVPADPFAIVSR		1	1	Q4VCS5	Q4VCS5	0	2	0.7258	0	1	1	1094.56	2188.11	2188.1	3.69	0.00403	HCD (High Energy Collision Dissociation)	MS2	0	36.825	39.7297	43381	WQR_1_20190806.raw	F4	5.58	0	0.01919
		FALSE	High	Sequest HT (A2)	Unambiguous	AQPSSASYQPVPADPFAIVSR		1	1	Q4VCS5	Q4VCS5	0	2	0.7685	0	1	1	1094.56	2188.11	2188.1	2.13	0.00233	HCD (High Energy Collision Dissociation)	MS2	0	15.218	39.7421	43395	WQR_1_20190806.raw	F4	5.14	0	0.002954
	FALSE	High	AQQMVEILSDENR	1xOxidation [M4]	0.00109928	0	1	1	1	Q4VCS5	0	1548.73	High	0	0.0008793	4.07
		Checked	Confidence	Identifying Node	PSM Ambiguity	Annotated Sequence	Modifications	# Protein Groups	# Proteins	Master Protein Accessions	Protein Accessions	# Missed Cleavages	Charge	DeltaScore	DeltaCn	Rank	Search Engine Rank	m/z [Da]	MH+ [Da]	Theo. MH+ [Da]	DeltaM [ppm]	Deltam/z [Da]	Activation Type	MS Order	Isolation Interference [%]	Ion Inject Time [ms]	RT [min]	First Scan	Spectrum File	File ID	XCorr	Percolator q-Value	Percolator PEP
		FALSE	High	Sequest HT (A2)	Unambiguous	AQQmVEILSDENR	M4(Oxidation)	1	1	Q4VCS5	Q4VCS5	0	2	0.8133	0	1	1	774.869	1548.73	1548.73	-0.64	-0.0005	HCD (High Energy Collision Dissociation)	MS2	0	45	19.7089	19028	WQR_1_20190806.raw	F4	4.07	0	0.0008793
	FALSE	High	HFALDAAATVAAQR		0.00010907	0	1	1	3	Q4VCS5	0	1441.75	High	0	7.921e-05	4.32
		Checked	Confidence	Identifying Node	PSM Ambiguity	Annotated Sequence	Modifications	# Protein Groups	# Proteins	Master Protein Accessions	Protein Accessions	# Missed Cleavages	Charge	DeltaScore	DeltaCn	Rank	Search Engine Rank	m/z [Da]	MH+ [Da]	Theo. MH+ [Da]	DeltaM [ppm]	Deltam/z [Da]	Activation Type	MS Order	Isolation Interference [%]	Ion Inject Time [ms]	RT [min]	First Scan	Spectrum File	File ID	XCorr	Percolator q-Value	Percolator PEP
		FALSE	High	Sequest HT (A2)	Unambiguous	HFALDAAATVAAQR		1	1	Q4VCS5	Q4VCS5	0	2	0.7115	0	1	1	721.38	1441.75	1441.75	-1.49	-0.00107	HCD (High Energy Collision Dissociation)	MS2	0	41.179	24.0537	24322	WQR_1_20190806.raw	F4	3.57	0	0.003335
		FALSE	High	Sequest HT (A2)	Unambiguous	HFALDAAATVAAQR		1	1	Q4VCS5	Q4VCS5	0	2	0.7037	0	1	1	721.381	1441.75	1441.75	-0.56	-0.0004	HCD (High Energy Collision Dissociation)	MS2	74.5332	2.096	23.9371	24165	WQR_1_20190806.raw	F4	4.32	0	7.921e-05
		FALSE	High	Sequest HT (A2)	Unambiguous	HFALDAAATVAAQR		1	1	Q4VCS5	Q4VCS5	0	3	0.477	0	1	1	481.257	1441.76	1441.75	1.68	0.00081	HCD (High Energy Collision Dissociation)	MS2	90.9377	5.48	24.707	25091	WQR_1_20190806.raw	F4	2.39	0.001475	0.1153
	FALSE	High	VSEAYENLVK		0.0166283	0	1	1	4	Q4VCS5	0	1151.59	High	0	0.01484	3.09
		Checked	Confidence	Identifying Node	PSM Ambiguity	Annotated Sequence	Modifications	# Protein Groups	# Proteins	Master Protein Accessions	Protein Accessions	# Missed Cleavages	Charge	DeltaScore	DeltaCn	Rank	Search Engine Rank	m/z [Da]	MH+ [Da]	Theo. MH+ [Da]	DeltaM [ppm]	Deltam/z [Da]	Activation Type	MS Order	Isolation Interference [%]	Ion Inject Time [ms]	RT [min]	First Scan	Spectrum File	File ID	XCorr	Percolator q-Value	Percolator PEP
		FALSE	High	Sequest HT (A2)	Unambiguous	VSEAYENLVK		1	1	Q4VCS5	Q4VCS5	0	2	0.5869	0	1	1	576.3	1151.59	1151.59	-0.63	-0.00036	HCD (High Energy Collision Dissociation)	MS2	30.484	3.011	21.1993	20837	WQR_1_20190806.raw	F4	2.59	0	0.02
		FALSE	High	Sequest HT (A2)	Unambiguous	VSEAYENLVK		1	1	Q4VCS5	Q4VCS5	0	2	0.5728	0	1	1	576.301	1151.59	1151.59	0.54	0.00031	HCD (High Energy Collision Dissociation)	MS2	34.3847	6.287	21.1199	20737	WQR_1_20190806.raw	F4	3.09	0	0.01484
		FALSE	High	Sequest HT (A2)	Unambiguous	VSEAYENLVK		1	1	Q4VCS5	Q4VCS5	0	2	0.3033	0	1	1	576.3	1151.59	1151.59	-1.58	-0.00091	HCD (High Energy Collision Dissociation)	MS2	64.4289	3.021	21.2483	20893	WQR_1_20190806.raw	F4	1.22	0.0007925	0.05196
		FALSE	High	Sequest HT (A2)	Unambiguous	VSEAYENLVK		1	1	Q4VCS5	Q4VCS5	0	2	0.4072	0	1	1	576.299	1151.59	1151.59	-2.33	-0.00134	HCD (High Energy Collision Dissociation)	MS2	55.0046	5.446	21.2642	20911	WQR_1_20190806.raw	F4	1.67	0.0007925	0.02982
	FALSE	High	QELEGCYEK	1xCarbamidomethyl [C6]	0.0810567	0.00152962	1	1	1	Q4VCS5	0	1155.5	High	0.0007925	0.07697	2.53
		Checked	Confidence	Identifying Node	PSM Ambiguity	Annotated Sequence	Modifications	# Protein Groups	# Proteins	Master Protein Accessions	Protein Accessions	# Missed Cleavages	Charge	DeltaScore	DeltaCn	Rank	Search Engine Rank	m/z [Da]	MH+ [Da]	Theo. MH+ [Da]	DeltaM [ppm]	Deltam/z [Da]	Activation Type	MS Order	Isolation Interference [%]	Ion Inject Time [ms]	RT [min]	First Scan	Spectrum File	File ID	XCorr	Percolator q-Value	Percolator PEP
		FALSE	High	Sequest HT (A2)	Unambiguous	QELEGcYEK	C6(Carbamidomethyl)	1	1	Q4VCS5	Q4VCS5	0	2	0.3715	0	1	1	578.253	1155.5	1155.5	-0.18	-0.0001	HCD (High Energy Collision Dissociation)	MS2	34.3701	7.712	11.8714	9907	WQR_1_20190806.raw	F4	2.53	0.0007925	0.07697
	FALSE	High	TDGPVFHSNTLER		0.0377902	0.00152962	1	1	1	Q4VCS5	0	1472.71	High	0.0007925	0.03492	2.87
		Checked	Confidence	Identifying Node	PSM Ambiguity	Annotated Sequence	Modifications	# Protein Groups	# Proteins	Master Protein Accessions	Protein Accessions	# Missed Cleavages	Charge	DeltaScore	DeltaCn	Rank	Search Engine Rank	m/z [Da]	MH+ [Da]	Theo. MH+ [Da]	DeltaM [ppm]	Deltam/z [Da]	Activation Type	MS Order	Isolation Interference [%]	Ion Inject Time [ms]	RT [min]	First Scan	Spectrum File	File ID	XCorr	Percolator q-Value	Percolator PEP
		FALSE	High	Sequest HT (A2)	Unambiguous	TDGPVFHSNTLER		1	1	Q4VCS5	Q4VCS5	0	3	0.4948	0	1	1	491.575	1472.71	1472.71	-1.72	-0.00084	HCD (High Energy Collision Dissociation)	MS2	86.2916	45	17.1027	15954	WQR_1_20190806.raw	F4	2.87	0.0007925	0.03492
	FALSE	High	AQGPLPNQHSLK		0.0390776	0.00152962	1	1	1	Q4VCS5	0	1289.7	High	0.0007925	0.03606	2.48
		Checked	Confidence	Identifying Node	PSM Ambiguity	Annotated Sequence	Modifications	# Protein Groups	# Proteins	Master Protein Accessions	Protein Accessions	# Missed Cleavages	Charge	DeltaScore	DeltaCn	Rank	Search Engine Rank	m/z [Da]	MH+ [Da]	Theo. MH+ [Da]	DeltaM [ppm]	Deltam/z [Da]	Activation Type	MS Order	Isolation Interference [%]	Ion Inject Time [ms]	RT [min]	First Scan	Spectrum File	File ID	XCorr	Percolator q-Value	Percolator PEP
		FALSE	High	Sequest HT (A2)	Unambiguous	AQGPLPNQHSLK		1	1	Q4VCS5	Q4VCS5	0	2	0.625	0	1	1	645.353	1289.7	1289.7	1.73	0.00112	HCD (High Energy Collision Dissociation)	MS2	0	45	12.0764	10142	WQR_1_20190806.raw	F4	2.48	0.0007925	0.03606
	FALSE	High	EKLEAELATAR		0.0491662	0.00152962	1	1	1	Q4VCS5	1	1230.67	High	0.0007925	0.04584	2.6
		Checked	Confidence	Identifying Node	PSM Ambiguity	Annotated Sequence	Modifications	# Protein Groups	# Proteins	Master Protein Accessions	Protein Accessions	# Missed Cleavages	Charge	DeltaScore	DeltaCn	Rank	Search Engine Rank	m/z [Da]	MH+ [Da]	Theo. MH+ [Da]	DeltaM [ppm]	Deltam/z [Da]	Activation Type	MS Order	Isolation Interference [%]	Ion Inject Time [ms]	RT [min]	First Scan	Spectrum File	File ID	XCorr	Percolator q-Value	Percolator PEP
		FALSE	High	Sequest HT (A2)	Unambiguous	EKLEAELATAR		1	1	Q4VCS5	Q4VCS5	1	2	0.3962	0	1	1	615.839	1230.67	1230.67	1.81	0.00111	HCD (High Energy Collision Dissociation)	MS2	47.8194	32.001	16.9185	15734	WQR_1_20190806.raw	F4	2.6	0.0007925	0.04584
	FALSE	High	TLHAQIIEK		0.0333227	0.00152962	1	1	1	Q4VCS5	0	1052.61	High	0.0007925	0.03065	3.43
		Checked	Confidence	Identifying Node	PSM Ambiguity	Annotated Sequence	Modifications	# Protein Groups	# Proteins	Master Protein Accessions	Protein Accessions	# Missed Cleavages	Charge	DeltaScore	DeltaCn	Rank	Search Engine Rank	m/z [Da]	MH+ [Da]	Theo. MH+ [Da]	DeltaM [ppm]	Deltam/z [Da]	Activation Type	MS Order	Isolation Interference [%]	Ion Inject Time [ms]	RT [min]	First Scan	Spectrum File	File ID	XCorr	Percolator q-Value	Percolator PEP
		FALSE	High	Sequest HT (A2)	Unambiguous	TLHAQIIEK		1	1	Q4VCS5	Q4VCS5	0	2	0.586	0	1	1	526.81	1052.61	1052.61	2.59	0.00136	HCD (High Energy Collision Dissociation)	MS2	5.0652	8.631	12.861	11062	WQR_1_20190806.raw	F4	3.43	0.0007925	0.03065
	FALSE	High	LSIPSLTCNPDK	1xCarbamidomethyl [C8]	0.0341725	0.00152962	1	1	1	Q4VCS5	0	1344.68	High	0.0007925	0.03138	2.2
		Checked	Confidence	Identifying Node	PSM Ambiguity	Annotated Sequence	Modifications	# Protein Groups	# Proteins	Master Protein Accessions	Protein Accessions	# Missed Cleavages	Charge	DeltaScore	DeltaCn	Rank	Search Engine Rank	m/z [Da]	MH+ [Da]	Theo. MH+ [Da]	DeltaM [ppm]	Deltam/z [Da]	Activation Type	MS Order	Isolation Interference [%]	Ion Inject Time [ms]	RT [min]	First Scan	Spectrum File	File ID	XCorr	Percolator q-Value	Percolator PEP
		FALSE	High	Sequest HT (A2)	Unambiguous	LSIPSLTcNPDK	C8(Carbamidomethyl)	1	1	Q4VCS5	Q4VCS5	0	2	0.5091	0	1	1	672.844	1344.68	1344.68	-1.54	-0.00103	HCD (High Energy Collision Dissociation)	MS2	78.3394	45	29.4527	30886	WQR_1_20190806.raw	F4	2.2	0.0007925	0.03138
	FALSE	High	DQALSNAQAK		0.0499918	0.00152962	1	1	1	Q4VCS5	0	1045.53	High	0.0007925	0.0467	2.47
		Checked	Confidence	Identifying Node	PSM Ambiguity	Annotated Sequence	Modifications	# Protein Groups	# Proteins	Master Protein Accessions	Protein Accessions	# Missed Cleavages	Charge	DeltaScore	DeltaCn	Rank	Search Engine Rank	m/z [Da]	MH+ [Da]	Theo. MH+ [Da]	DeltaM [ppm]	Deltam/z [Da]	Activation Type	MS Order	Isolation Interference [%]	Ion Inject Time [ms]	RT [min]	First Scan	Spectrum File	File ID	XCorr	Percolator q-Value	Percolator PEP
		FALSE	High	Sequest HT (A2)	Unambiguous	DQALSNAQAK		1	1	Q4VCS5	Q4VCS5	0	2	0.6437	0	1	1	523.268	1045.53	1045.53	1.52	0.0008	HCD (High Energy Collision Dissociation)	MS2	64.8698	11.302	8.2478	5660	WQR_1_20190806.raw	F4	2.47	0.0007925	0.0467
	FALSE	High	NPTSSSEFYK		0.0740617	0.00152962	1	1	1	Q4VCS5	0	1159.53	High	0.0007925	0.07001	2.05
		Checked	Confidence	Identifying Node	PSM Ambiguity	Annotated Sequence	Modifications	# Protein Groups	# Proteins	Master Protein Accessions	Protein Accessions	# Missed Cleavages	Charge	DeltaScore	DeltaCn	Rank	Search Engine Rank	m/z [Da]	MH+ [Da]	Theo. MH+ [Da]	DeltaM [ppm]	Deltam/z [Da]	Activation Type	MS Order	Isolation Interference [%]	Ion Inject Time [ms]	RT [min]	First Scan	Spectrum File	File ID	XCorr	Percolator q-Value	Percolator PEP
		FALSE	High	Sequest HT (A2)	Unambiguous	NPTSSSEFYK		1	1	Q4VCS5	Q4VCS5	0	2	0.6293	0	1	1	580.267	1159.53	1159.53	-0.15	-9e-05	HCD (High Energy Collision Dissociation)	MS2	47.8546	37.643	14.1768	12613	WQR_1_20190806.raw	F4	2.05	0.0007925	0.07001
	FALSE	High	NLRQELEGCYEK	1xCarbamidomethyl [C9]	0.0316849	0.00152962	1	1	2	Q4VCS5	1	1538.73	High	0.0007925	0.02902	3.85
		Checked	Confidence	Identifying Node	PSM Ambiguity	Annotated Sequence	Modifications	# Protein Groups	# Proteins	Master Protein Accessions	Protein Accessions	# Missed Cleavages	Charge	DeltaScore	DeltaCn	Rank	Search Engine Rank	m/z [Da]	MH+ [Da]	Theo. MH+ [Da]	DeltaM [ppm]	Deltam/z [Da]	Activation Type	MS Order	Isolation Interference [%]	Ion Inject Time [ms]	RT [min]	First Scan	Spectrum File	File ID	XCorr	Percolator q-Value	Percolator PEP
		FALSE	High	Sequest HT (A2)	Unambiguous	NLRQELEGcYEK	C9(Carbamidomethyl)	1	1	Q4VCS5	Q4VCS5	1	2	0.5558	0	1	1	769.867	1538.73	1538.73	0.29	0.00023	HCD (High Energy Collision Dissociation)	MS2	64.0711	45	20.7777	20291	WQR_1_20190806.raw	F4	3.85	0.0007925	0.02902
		FALSE	High	Sequest HT (A2)	Unambiguous	NLRQELEGcYEK	C9(Carbamidomethyl)	1	1	Q4VCS5	Q4VCS5	1	3	0.5664	0	1	1	513.581	1538.73	1538.73	0.84	0.00043	HCD (High Energy Collision Dissociation)	MS2	18.0504	14.15	20.7347	20234	WQR_1_20190806.raw	F4	2.86	0.001475	0.1067
	FALSE	High	ILALEADMTK	1xOxidation [M8]	0.0794133	0.00152962	2	2	1	Q4VCS5; Q8IY63	0	1120.59	High	0.0007925	0.07519	2.24
		Checked	Confidence	Identifying Node	PSM Ambiguity	Annotated Sequence	Modifications	# Protein Groups	# Proteins	Master Protein Accessions	Protein Accessions	# Missed Cleavages	Charge	DeltaScore	DeltaCn	Rank	Search Engine Rank	m/z [Da]	MH+ [Da]	Theo. MH+ [Da]	DeltaM [ppm]	Deltam/z [Da]	Activation Type	MS Order	Isolation Interference [%]	Ion Inject Time [ms]	RT [min]	First Scan	Spectrum File	File ID	XCorr	Percolator q-Value	Percolator PEP
		FALSE	High	Sequest HT (A2)	Unambiguous	ILALEADmTK	M8(Oxidation)	2	2	Q4VCS5; Q8IY63	Q4VCS5; Q8IY63	0	2	0.5268	0	1	1	560.799	1120.59	1120.59	-0.76	-0.00042	HCD (High Energy Collision Dissociation)	MS2	0	28.177	20.5251	19983	WQR_1_20190806.raw	F4	2.24	0.0007925	0.07519
	FALSE	High	ILALEADMTK		0.0690579	0.00152962	2	2	1	Q4VCS5; Q8IY63	0	1104.6	High	0.0007925	0.06523	2.86
		Checked	Confidence	Identifying Node	PSM Ambiguity	Annotated Sequence	Modifications	# Protein Groups	# Proteins	Master Protein Accessions	Protein Accessions	# Missed Cleavages	Charge	DeltaScore	DeltaCn	Rank	Search Engine Rank	m/z [Da]	MH+ [Da]	Theo. MH+ [Da]	DeltaM [ppm]	Deltam/z [Da]	Activation Type	MS Order	Isolation Interference [%]	Ion Inject Time [ms]	RT [min]	First Scan	Spectrum File	File ID	XCorr	Percolator q-Value	Percolator PEP
		FALSE	High	Sequest HT (A2)	Unambiguous	ILALEADMTK		2	2	Q4VCS5; Q8IY63	Q4VCS5; Q8IY63	0	2	0.6154	0	1	1	552.802	1104.6	1104.6	-0.4	-0.00022	HCD (High Energy Collision Dissociation)	MS2	0	7.29	27.8754	28991	WQR_1_20190806.raw	F4	2.86	0.0007925	0.06523
	FALSE	High	YLEENVMR		0.108207	0.00267473	1	1	1	Q4VCS5	0	1053.5	High	0.001475	0.1036	1.85
[truncated: 2,266 more rows]

## Sheet: YAP+MST1+SAV1+PPM1A 
Checked	Protein FDR Confidence: Combined	Master	Accession	Description	Exp. q-value: Combined	Sum PEP Score	Coverage [%]	# Peptides	# PSMs	# Unique Peptides	# Protein Groups	# AAs	MW [kDa]	calc. pI	Score Sequest HT: Sequest HT	# Peptides (by Search Engine): Sequest HT
[truncated: 3,444 more rows]
